# Supplementary material for: Calculating Orthologs in Bacteria and Archaea: A Divide and Conquer Approach
Source: PLoS One. 2011 Dec 12;6(12):e28388. doi: 10.1371/journal.pone.0028388 (PMC3236195; doi:10.1371/journal.pone.0028388)
Supplement: Dataset S2 — List of highly conserved bacterial orthologs (HCBOs). (XLS) [file pone.0028388.s002.xls]

## Sheet: potential core CDS
Legend:
	no hit found in this genome
	questionable hit found (either similarity or coverage less than 60%)
		CDSs from this OG	Missing in # genomes	Found good hit in missing	CDSs from this OG	Occurence			Core genes by
xBASE OG label	common name	occur in # genomes	(based on annotation)	(using six-frame PROMER)	detected in # genomes	(% of all)	COG match	COG code	Ciccarelli et al. 2006	No good hit found for this OG in these genomes
OG_00485978	molecular chaperone DnaK	1284	4	4	1288	1	COG0443	O
OG_00486020	translation initiation factor IF-2	1278	10	10	1288	1	COG1298	N
OG_00486750	translation initiation factor IF-1	1266	22	22	1288	1	COG0361	J
OG_00486732	peptide chain release factor 1	1287	1	0	1287	0.999224	COG0216	J		Mycoplasma conjunctivae HRC/581
OG_00840655	30S ribosomal protein S4	1284	4	3	1287	0.999224	COG0522	J	Ribosomal protein S4 and related proteins	butyrate-producing bacterium SM4/1
OG_00486990	50S ribosomal protein L17	1282	6	5	1287	0.999224	COG0203	J		Candidatus Carsonella ruddii PV
OG_00486122	50S ribosomal protein L3	1282	6	5	1287	0.999224	COG0087	J	Ribosomal protein L3	Desulfovibrio desulfuricans subsp. desulfuricans str. ATCC 27774
OG_00485793	tryptophanyl-tRNA synthetase	1282	6	5	1287	0.999224	COG0180	J		Synergistetes bacterium SGP1
OG_00803943	50S ribosomal protein L2	1281	7	6	1287	0.999224	COG0090	J		Streptococcus mutans UA159
OG_00486482	30S ribosomal protein S2	1280	8	7	1287	0.999224	COG0052	J	Ribosomal protein S2	Bacillus pumilus SAFR-032
OG_00803338	50S ribosomal protein L13	1279	9	8	1287	0.999224	COG0102	J	Ribosomal protein L13	Candidatus Carsonella ruddii PV
OG_00486663	DNA-directed RNA polymerase subunit alpha	1272	16	15	1287	0.999224	COG0202	K	DNA-directed RNA polymerase, alpha subunit	Eubacterium cylindroides T2-87
OG_00763948	30S ribosomal protein S10	1270	18	17	1287	0.999224	COG0051	J		butyrate-producing bacterium SM4/1
OG_00486751	30S ribosomal protein S12	1269	19	18	1287	0.999224	COG0048	J	Ribosomal protein S12	Thermoanaerobacter mathranii subsp. mathranii str. A3
OG_00486885	30S ribosomal protein S19	1264	24	23	1287	0.999224	COG0185	J		Candidatus Hodgkinia cicadicola Dsem
OG_00486209	translation initiation factor IF-3	1249	39	38	1287	0.999224	COG0290	J		Eubacterium cylindroides T2-87
OG_00486785	50S ribosomal protein L5	1213	75	74	1287	0.999224	COG0094	J	Ribosomal protein L5	Candidatus Hodgkinia cicadicola Dsem
OG_00487202	50S ribosomal protein L21	1285	3	1	1286	0.998447	COG0142	H		Candidatus Carsonella ruddii PV	Candidatus Hodgkinia cicadicola Dsem
OG_00804593	DNA gyrase subunit A	1283	5	3	1286	0.998447	COG0188	L		Candidatus Carsonella ruddii PV	Candidatus Hodgkinia cicadicola Dsem
OG_00486478	50S ribosomal protein L11	1282	6	4	1286	0.998447	COG0080	J	Ribosomal protein L11	Thermoanaerobacter mathranii subsp. mathranii str. A3	butyrate-producing bacterium SM4/1
OG_00776110	50S ribosomal protein L22	1282	6	4	1286	0.998447	COG0091	J	Ribosomal protein L22	Candidatus Carsonella ruddii PV	Candidatus Hodgkinia cicadicola Dsem
OG_00487076	50S ribosomal protein L4	1282	6	4	1286	0.998447	COG0088	J		Candidatus Carsonella ruddii PV	Gordonibacter pamelaeae 7-10-1-b
OG_00803544	50S ribosomal protein L15	1279	9	7	1286	0.998447	COG0200	J	Ribosomal protein L15	Buchnera aphidicola str. JF98 (Acyrthosiphon pisum)	Candidatus Zinderia insecticola CARI
OG_00793487	GTPase ObgE	1278	10	8	1286	0.998447	COG0536	R		Candidatus Hodgkinia cicadicola Dsem	butyrate-producing bacterium SM4/1
OG_00803130	30S ribosomal protein S13	1277	11	9	1286	0.998447	COG0099	J	Ribosomal protein S13	Eubacterium cylindroides T2-87	butyrate-producing bacterium SM4/1
OG_00762959	elongation factor G	1277	11	9	1286	0.998447	COG0480	J		Buchnera aphidicola str. JF98 (Acyrthosiphon pisum)	Coprococcus sp. ART55/1
OG_00487096	50S ribosomal protein L14	1273	15	13	1286	0.998447	COG0093	J	Ribosomal protein L14	Enterococcus sp. 7L76	Coprococcus sp. ART55/1
OG_00486066	30S ribosomal protein S17	1257	31	29	1286	0.998447	COG0186	J	Ribosomal protein S17	Candidatus Zinderia insecticola CARI	Coprococcus sp. ART55/1
OG_00805761	30S ribosomal protein S5	1220	68	66	1286	0.998447	COG0098	J	Ribosomal protein S5	Candidatus Hodgkinia cicadicola Dsem	Roseburia intestinalis XB6B4
OG_00486754	seryl-tRNA synthetase	1283	5	2	1285	0.997671	COG0172	J	Seryl-tRNA synthetase	Candidatus Hodgkinia cicadicola Dsem	Coprococcus sp. ART55/1	Eubacterium cylindroides T2-87
OG_00804018	30S ribosomal protein S8	1282	6	3	1285	0.997671	COG0096	J	Ribosomal protein S8	Candidatus Carsonella ruddii PV	Lactobacillus salivarius CECT 5713	Coprococcus sp. ART55/1
OG_00486659	elongation factor Tu	1281	7	4	1285	0.997671	COG0050	JE		Enterobacter cloacae subsp. cloacae NCTC 9394	Eubacterium cylindroides T2-87	Synergistetes bacterium SGP1
OG_00487168	phenylalanyl-tRNA synthetase, alpha subunit	1281	7	4	1285	0.997671	COG0016	J	Phenylalanine-tRNA synthethase alpha subunit	Candidatus Carsonella ruddii PV	Buchnera aphidicola str. JF98 (Acyrthosiphon pisum)	butyrate-producing bacterium SM4/1
OG_00871789	50S ribosomal protein L1	1280	8	5	1285	0.997671	COG0081	J	Ribosomal protein L1	Candidatus Carsonella ruddii PV	Candidatus Hodgkinia cicadicola Dsem	Thermoanaerobacter mathranii subsp. mathranii str. A3
OG_00486761	50S ribosomal protein L6	1278	10	7	1285	0.997671	COG0097	J	Ribosomal protein L6P/L9E	Desulfotalea psychrophila LSv54	Granulibacter bethesdensis CGDNIH1	Yersinia pestis D182038
OG_00511719	50S ribosomal protein L7/L12	1278	10	7	1285	0.997671	COG0222	J		Neorickettsia risticii str. Illinois	Neorickettsia sennetsu str. Miyayama	Thermoanaerobacter mathranii subsp. mathranii str. A3
OG_00804068	DNA-directed RNA polymerase subunit beta'	1276	12	9	1285	0.997671	COG0085 (or COG0086)	K	DNA-directed RNA polymerase, beta subunit	Thermoanaerobacter mathranii subsp. mathranii str. A3	Buchnera aphidicola str. JF98 (Acyrthosiphon pisum)	butyrate-producing bacterium SM4/1
OG_00871634	histidyl-tRNA synthetase	1276	12	9	1285	0.997671	COG0124	J	Histidyl-tRNA synthetase	Candidatus Sulcia muelleri DMIN	Candidatus Sulcia muelleri GWSS	Candidatus Sulcia muelleri SMDSEM
OG_00795347	Chaperone protein DnaJ	1275	13	10	1285	0.997671	COG0484	O		Candidatus Carsonella ruddii PV	Bacteroides xylanisolvens XB1A	Buchnera aphidicola str. JF98 (Acyrthosiphon pisum)
OG_00802690	50S ribosomal protein L19	1274	14	11	1285	0.997671	COG0335	J		Candidatus Carsonella ruddii PV	Candidatus Hodgkinia cicadicola Dsem	Mycoplasma conjunctivae HRC/581
OG_00485878	30S ribosomal protein S18	1268	20	17	1285	0.997671	COG0238	J		Candidatus Carsonella ruddii PV	Candidatus Zinderia insecticola CARI	Helicobacter pylori 908
OG_00780165	alanyl-tRNA synthetase	1277	11	7	1284	0.996894	COG1396	K		Candidatus Hodgkinia cicadicola Dsem	Candidatus Sulcia muelleri DMIN	Candidatus Sulcia muelleri GWSS	butyrate-producing bacterium SM4/1
OG_00486869	50S ribosomal protein L27	1270	18	14	1284	0.996894	COG0211	J		Mycoplasma gallisepticum str. F	Mycoplasma gallisepticum str. R(high)	Mycoplasma gallisepticum str. R(low)	Neisseria meningitidis alpha710
OG_00487167	50S ribosomal protein L31	1267	21	17	1284	0.996894	COG0254	J		Candidatus Carsonella ruddii PV	Candidatus Hodgkinia cicadicola Dsem	Coprococcus sp. ART55/1	Coprothermobacter proteolyticus DSM 5265
OG_00485816	methionyl-tRNA synthetase	1220	68	64	1284	0.996894	COG0143	J	Methionyl-tRNA synthetase	Candidatus Hodgkinia cicadicola Dsem	Candidatus Sulcia muelleri DMIN	Candidatus Sulcia muelleri GWSS	butyrate-producing bacterium SM4/1
OG_00803942	threonyl-tRNA synthetase	1282	6	1	1283	0.996118	COG0441	J		Candidatus Carsonella ruddii PV	Candidatus Hodgkinia cicadicola Dsem	Candidatus Sulcia muelleri DMIN	Candidatus Sulcia muelleri GWSS	Candidatus Sulcia muelleri SMDSEM
OG_00792356	tyrosyl-tRNA synthetase	1281	7	2	1283	0.996118	COG0162	J		Candidatus Hodgkinia cicadicola Dsem	Buchnera aphidicola str. JF98 (Acyrthosiphon pisum)	Escherichia coli 536	Haemophilus influenzae PittEE	Rickettsia bellii OSU 85-389
OG_00871768	ATP-dependent metalloprotease FtsH	1276	12	7	1283	0.996118	COG0465	O		Candidatus Carsonella ruddii PV	Candidatus Hodgkinia cicadicola Dsem	Candidatus Sulcia muelleri CARI	Candidatus Sulcia muelleri SMDSEM	Candidatus Zinderia insecticola CARI
OG_00691449	preprotein translocase subunit SecY	1273	15	10	1283	0.996118	COG0201	N	Preprotein translocase subunit SecY	Candidatus Carsonella ruddii PV	Candidatus Hodgkinia cicadicola Dsem	Candidatus Sulcia muelleri SMDSEM	Candidatus Zinderia insecticola CARI	Faecalibacterium prausnitzii L2-6
OG_00487053	30S ribosomal protein S11	1270	18	13	1283	0.996118	COG0100	J	Ribosomal protein S11	Erwinia pyrifoliae DSM 12163	Eubacterium cylindroides T2-87	Mycoplasma hyorhinis HUB-1	Vibrio furnissii NCTC 11218	butyrate-producing bacterium SM4/1
OG_00487061	elongation factor Ts	1281	7	1	1282	0.995342	COG0264	J		Candidatus Carsonella ruddii PV	Candidatus Hodgkinia cicadicola Dsem	Candidatus Sulcia muelleri DMIN	Candidatus Sulcia muelleri GWSS	butyrate-producing bacterium SM4/1	Buchnera aphidicola str. JF98 (Acyrthosiphon pisum)
OG_00439379	methionine aminopeptidase	1279	9	3	1282	0.995342	COG0024	J		Candidatus Hodgkinia cicadicola Dsem	Candidatus Sulcia muelleri CARI	Candidatus Sulcia muelleri DMIN	Candidatus Sulcia muelleri GWSS	Candidatus Sulcia muelleri SMDSEM	Candidatus Zinderia insecticola CARI
OG_00871756	Preprotein translocase subunit SecA	1279	9	3	1282	0.995342	COG0653	N		Candidatus Carsonella ruddii PV	Candidatus Hodgkinia cicadicola Dsem	Candidatus Zinderia insecticola CARI	Escherichia coli UM146	Nautilia profundicola AmH	butyrate-producing bacterium SM4/1
OG_00177296	ABC transporter related	1281	7	0	1281	0.994565	COG0745	TK		Candidatus Carsonella ruddii PV	Candidatus Hodgkinia cicadicola Dsem	Candidatus Sulcia muelleri CARI	Candidatus Sulcia muelleri DMIN	Candidatus Sulcia muelleri GWSS	Candidatus Sulcia muelleri SMDSEM	Candidatus Zinderia insecticola CARI
OG_00804797	50S ribosomal protein L9	1278	10	3	1281	0.994565	COG0359	J		Candidatus Carsonella ruddii PV	Candidatus Hodgkinia cicadicola Dsem	Candidatus Sulcia muelleri CARI	Candidatus Sulcia muelleri DMIN	Candidatus Sulcia muelleri GWSS	Candidatus Zinderia insecticola CARI	Mycoplasma penetrans HF-2
OG_00803160	transcription elongation factor NusA	1277	11	4	1281	0.994565	COG0195	K		Candidatus Carsonella ruddii PV	Candidatus Hodgkinia cicadicola Dsem	Candidatus Sulcia muelleri CARI	Candidatus Sulcia muelleri DMIN	Candidatus Sulcia muelleri GWSS	Candidatus Zinderia insecticola CARI	Mycoplasma pneumoniae FH
OG_00763245	dimethyladenosine transferase	1275	13	6	1281	0.994565	COG0030	J		Candidatus Amoebophilus asiaticus 5a2	Candidatus Carsonella ruddii PV	Candidatus Hodgkinia cicadicola Dsem	Synergistetes bacterium SGP1	Buchnera aphidicola str. Bp (Baizongia pistaciae)	Buchnera aphidicola str. JF98 (Acyrthosiphon pisum)	Gordonibacter pamelaeae 7-10-1-b
OG_00485977	putative metalloprotease	1275	13	6	1281	0.994565	COG0319	R		Buchnera aphidicola str. Cc (Cinara cedri)	Candidatus Carsonella ruddii PV	Candidatus Hodgkinia cicadicola Dsem	Synergistetes bacterium SGP1	cyanobacterium UCYN-A	Clostridiales genomosp. BVAB3 str. UPII9-5	Desulfotalea psychrophila LSv54
OG_00086231	50S ribosomal protein L18	1280	8	0	1280	0.993789	COG0256	J	Ribosomal protein L18	Buchnera aphidicola str. Cc (Cinara cedri)	Candidatus Carsonella ruddii PV	Candidatus Hodgkinia cicadicola Dsem	Enterococcus sp. 7L76	Lactobacillus fermentum CECT 5716	Lactobacillus salivarius CECT 5713	Megamonas hypermegale	Synergistetes bacterium SGP1
OG_00804543	methionyl-tRNA formyltransferase	1279	9	1	1280	0.993789	COG2217	P		Candidatus Carsonella ruddii PV	Candidatus Hodgkinia cicadicola Dsem	Candidatus Zinderia insecticola CARI	Mycoplasma hyopneumoniae 168	Mycoplasma hyopneumoniae 232	Mycoplasma hyopneumoniae 7448	Mycoplasma hyopneumoniae J	Mycoplasma hyorhinis HUB-1
OG_00764076	elongation factor P	1276	12	4	1280	0.993789	COG0231	J		Buchnera aphidicola str. Bp (Baizongia pistaciae)	Candidatus Carsonella ruddii PV	Candidatus Hodgkinia cicadicola Dsem	Candidatus Sulcia muelleri DMIN	Candidatus Sulcia muelleri GWSS	Candidatus Sulcia muelleri SMDSEM	Candidatus Zinderia insecticola CARI	Leptospira interrogans serovar Copenhageni str. Fiocruz L1-130
OG_00485810	30S ribosomal protein S3	1272	16	8	1280	0.993789	COG0092	J	Ribosomal protein S3	Mesoplasma florum L1	Mycoplasma capricolum subsp. capricolum ATCC 27343	Mycoplasma leachii PG50	Mycoplasma mycoides subsp. capri str. GM12 (deltatypeIIIres clone)	Mycoplasma mycoides subsp. capri str. GM12 (tetM-lacZ clone)	Mycoplasma mycoides subsp. mycoides SC str. Gladysdale	Mycoplasma mycoides subsp. mycoides SC str. PG1	butyrate-producing bacterium SM4/1
OG_00777384	50S ribosomal protein L24	1270	18	10	1280	0.993789	COG0198	J		Bdellovibrio bacteriovorus HD100	Candidatus Carsonella ruddii PV	Candidatus Hodgkinia cicadicola Dsem	Candidatus Sulcia muelleri DMIN	Candidatus Sulcia muelleri GWSS	Candidatus Sulcia muelleri SMDSEM	Ruminococcus sp. 18P13	butyrate-producing bacterium SSC/2
OG_00779674	50S ribosomal protein L10	1267	21	13	1280	0.993789	COG0244	J		Alteromonas macleodii 'Deep ecotype'	Buchnera aphidicola str. Cc (Cinara cedri)	Candidatus Carsonella ruddii PV	Candidatus Hodgkinia cicadicola Dsem	Candidatus Nitrospira defluvii	Neorickettsia risticii str. Illinois	Neorickettsia sennetsu str. Miyayama	Thermoanaerobacter mathranii subsp. mathranii str. A3
OG_00803183	peptidyl-tRNA hydrolase	1278	10	1	1279	0.993012	COG0193	J		Candidatus Carsonella ruddii PV	Candidatus Hodgkinia cicadicola Dsem	Candidatus Sulcia muelleri CARI	Candidatus Sulcia muelleri DMIN	Candidatus Sulcia muelleri GWSS	Candidatus Sulcia muelleri SMDSEM	Candidatus Zinderia insecticola CARI	Mesoplasma florum L1	Eubacterium cylindroides T2-87
OG_00485983	ribosome recycling factor	1278	10	1	1279	0.993012	COG0233	J		Buchnera aphidicola str. Bp (Baizongia pistaciae)	Buchnera aphidicola str. Cc (Cinara cedri)	Candidatus Hodgkinia cicadicola Dsem	Candidatus Sulcia muelleri DMIN	Candidatus Sulcia muelleri GWSS	Candidatus Zinderia insecticola CARI	Mycoplasma penetrans HF-2	Staphylococcus aureus subsp. aureus USA300_TCH1516	Lactobacillus brevis ATCC 367
OG_00485899	uridylate kinase	1277	11	2	1279	0.993012	COG0528	F		Candidatus Amoebophilus asiaticus 5a2	Candidatus Carsonella ruddii PV	Candidatus Hodgkinia cicadicola Dsem	Candidatus Pelagibacter ubique HTCC1062	Candidatus Sulcia muelleri CARI	Candidatus Sulcia muelleri DMIN	Candidatus Sulcia muelleri GWSS	Candidatus Sulcia muelleri SMDSEM	Candidatus Zinderia insecticola CARI
OG_00486225	30S ribosomal protein S9	1275	13	4	1279	0.993012	COG0103	J	Ribosomal protein S9	Alistipes shahii WAL 8301	Eubacterium rectale DSM 17629	Eubacterium rectale M104/1	Roseburia intestinalis	Roseburia intestinalis XB6B4	Ruminococcus obeum	Ruminococcus sp.	Ruminococcus torques	butyrate-producing bacterium SSC/2
OG_00486356	arginyl-tRNA synthetase	1274	14	5	1279	0.993012	COG0018	J	Arginyl-tRNA synthetase	Candidatus Carsonella ruddii PV	Candidatus Hodgkinia cicadicola Dsem	Candidatus Sulcia muelleri CARI	Candidatus Sulcia muelleri DMIN	Candidatus Sulcia muelleri GWSS	Candidatus Sulcia muelleri SMDSEM	Candidatus Zinderia insecticola CARI	Buchnera aphidicola str. JF98 (Acyrthosiphon pisum)	Ruminococcus torques
OG_00487321	30S ribosomal protein S6	1273	15	6	1279	0.993012	COG0360	J		Bacteriovorax marinus SJ	Candidatus Carsonella ruddii PV	Candidatus Hodgkinia cicadicola Dsem	Candidatus Zinderia insecticola CARI	Coraliomargarita akajimensis DSM 45221	Helicobacter pylori 908	Mycoplasma crocodyli MP145	Opitutus terrae PB90-1	Synergistetes bacterium SGP1
OG_00486823	SsrA-binding protein	1273	15	6	1279	0.993012	COG0691	O		Candidatus Carsonella ruddii PV	Candidatus Hodgkinia cicadicola Dsem	Gordonibacter pamelaeae 7-10-1-b	Mycoplasma arthritidis 158L3-1	Mycoplasma conjunctivae HRC/581	Mycoplasma hominis	Mycoplasma hyorhinis HUB-1	Mycoplasma pneumoniae FH	butyrate-producing bacterium SM4/1
OG_00802487	GTP-binding protein EngA	1269	19	10	1279	0.993012	COG1160	R		Candidatus Carsonella ruddii PV	Candidatus Hodgkinia cicadicola Dsem	Buchnera aphidicola str. Bp (Baizongia pistaciae)	Buchnera aphidicola str. Cc (Cinara cedri)	Candidatus Pelagibacter ubique HTCC1062	Elusimicrobium minutum Pei191	Ketogulonicigenium vulgare Y25	Pediococcus pentosaceus ATCC 25745	butyrate-producing bacterium SM4/1
OG_00688306	RNA polymerase sigma factor RpoD	1205	83	74	1279	0.993012	COG0568	K		Candidatus Hodgkinia cicadicola Dsem	Candidatus Zinderia insecticola CARI	Candidatus Carsonella ruddii PV	Frankia alni ACN14a	Jonesia denitrificans DSM 20603	Kocuria rhizophila DC2201	Micrococcus luteus NCTC 2665	Tropheryma whipplei TW08/27	Tropheryma whipplei str. Twist
OG_00487309	putative DNA-binding/iron metalloprotein/AP endonuclease	1274	14	4	1278	0.992236	COG0533	O	Metal-dependent proteases with chaperone activity	Candidatus Carsonella ruddii PV	Candidatus Hodgkinia cicadicola Dsem	Candidatus Sulcia muelleri CARI	Candidatus Sulcia muelleri DMIN	Candidatus Sulcia muelleri GWSS	Candidatus Sulcia muelleri SMDSEM	Candidatus Zinderia insecticola CARI	Buchnera aphidicola str. Cc (Cinara cedri)	Gordonibacter pamelaeae 7-10-1-b	butyrate-producing bacterium SM4/1
OG_00698526	cysteinyl-tRNA synthetase	1273	15	5	1278	0.992236	COG0215	J		Candidatus Carsonella ruddii PV	Candidatus Hodgkinia cicadicola Dsem	Candidatus Sulcia muelleri CARI	Candidatus Sulcia muelleri DMIN	Candidatus Sulcia muelleri GWSS	Candidatus Sulcia muelleri SMDSEM	Candidatus Zinderia insecticola CARI	Eubacterium cylindroides T2-87	Haemophilus influenzae PittEE	butyrate-producing bacterium SM4/1
OG_00486535	tRNA <guanine-N<1>->-methyltransferase	1271	17	7	1278	0.992236	COG0336	J		Candidatus Carsonella ruddii PV	Candidatus Hodgkinia cicadicola Dsem	Candidatus Sulcia muelleri CARI	Candidatus Sulcia muelleri DMIN	Candidatus Sulcia muelleri GWSS	Candidatus Sulcia muelleri SMDSEM	Candidatus Zinderia insecticola CARI	Gordonibacter pamelaeae 7-10-1-b	Mycoplasma conjunctivae HRC/581	butyrate-producing bacterium SM4/1
OG_00802986	30S ribosomal protein S15	1265	23	13	1278	0.992236	COG0184	J	Ribosomal protein S15P/S13E	Brachyspira hyodysenteriae WA1	Brachyspira murdochii DSM 12563	Brachyspira pilosicoli 95/1000	Candidatus Carsonella ruddii PV	Candidatus Hodgkinia cicadicola Dsem	Lactobacillus fermentum CECT 5716	Lactobacillus salivarius CECT 5713	Yersinia pestis D106004	Yersinia pestis D182038	Yersinia pestis Z176003
OG_00237963	ribosomal large subunit pseudouridine synthase D	1263	25	15	1278	0.992236	COG0564	J		Candidatus Hodgkinia cicadicola Dsem	Candidatus Zinderia insecticola CARI	Orientia tsutsugamushi str. Boryong	Orientia tsutsugamushi str. Ikeda	Bifidobacterium longum subsp. longum BBMN68	Chlamydia muridarum Nigg	Coprococcus sp. ART55/1	Lactobacillus fermentum CECT 5716	Synergistetes bacterium SGP1	Wolbachia endosymbiont strain TRS of Brugia malayi
OG_00700252	replicative DNA helicase	1238	50	40	1278	0.992236	COG0305	L		Candidatus Hodgkinia cicadicola Dsem	Candidatus Sulcia muelleri DMIN	Candidatus Sulcia muelleri GWSS	Cyanothece sp. PCC 7822	Gloeobacter violaceus PCC 7421	Haemophilus influenzae PittEE	Haemophilus influenzae PittGG	Salinibacter ruber DSM 13855	Thermosynechococcus elongatus BP-1	Trichodesmium erythraeum IMS101
OG_00486222	DNA polymerase III subunit alpha	1181	107	97	1278	0.992236	COG0587	L		Buchnera aphidicola str. JF98 (Acyrthosiphon pisum)	Chlorobium phaeobacteroides BS1	Clostridium perfringens ATCC 13124	Clostridium perfringens SM101	Eubacterium cylindroides T2-87	Eubacterium eligens ATCC 27750	Helicobacter pylori	Lactobacillus fermentum CECT 5716	Megamonas hypermegale	butyrate-producing bacterium SSC/2
OG_00738990	peptidase M22 glycoprotease	1275	13	2	1277	0.99146	COG1214	O		Candidatus Carsonella ruddii PV	Candidatus Hodgkinia cicadicola Dsem	Candidatus Sulcia muelleri CARI	Candidatus Sulcia muelleri DMIN	Candidatus Sulcia muelleri GWSS	Candidatus Sulcia muelleri SMDSEM	Candidatus Zinderia insecticola CARI	Wolbachia endosymbiont of Culex quinquefasciatus Pel	Wolbachia endosymbiont of Drosophila melanogaster	Wolbachia endosymbiont strain TRS of Brugia malayi	Wolbachia sp. wRi
OG_00499304	single-strand binding protein	1276	12	0	1276	0.990683	COG0629	L		Candidatus Carsonella ruddii PV	Candidatus Sulcia muelleri CARI	Candidatus Sulcia muelleri DMIN	Candidatus Sulcia muelleri GWSS	Candidatus Sulcia muelleri SMDSEM	Mycoplasma gallisepticum str. F	Mycoplasma gallisepticum str. R(high)	Mycoplasma gallisepticum str. R(low)	Mycoplasma genitalium G37	Mycoplasma pneumoniae FH	Mycoplasma pneumoniae M129	Lactobacillus fermentum CECT 5716
OG_00487105	glutamyl-tRNA synthetase	1244	44	32	1276	0.990683	COG0008	J		Candidatus Carsonella ruddii PV	Candidatus Hodgkinia cicadicola Dsem	Candidatus Sulcia muelleri DMIN	Candidatus Sulcia muelleri GWSS	Mycoplasma conjunctivae HRC/581	Mycoplasma hyopneumoniae 168	Mycoplasma hyopneumoniae 232	Mycoplasma hyopneumoniae 7448	Mycoplasma hyopneumoniae J	butyrate-producing bacterium SM4/1	Buchnera aphidicola str. JF98 (Acyrthosiphon pisum)	Gordonibacter pamelaeae 7-10-1-b
OG_00802410	GTP-dependent nucleic acid-binding protein EngD	1270	18	5	1275	0.989907	COG0012	R	Predicted GTPase, probable translation factor	Candidatus Carsonella ruddii PV	Candidatus Hodgkinia cicadicola Dsem	Candidatus Riesia pediculicola USDA	Candidatus Sulcia muelleri CARI	Candidatus Sulcia muelleri DMIN	Candidatus Sulcia muelleri GWSS	Candidatus Sulcia muelleri SMDSEM	Candidatus Zinderia insecticola CARI	Eubacterium cylindroides T2-87	Synergistetes bacterium SGP1	butyrate-producing bacterium SM4/1	Megamonas hypermegale	Ruminococcus sp.
OG_00871433	aspartyl-tRNA synthetase	1269	19	5	1274	0.98913	COG0173	J		Candidatus Hodgkinia cicadicola Dsem	Candidatus Sulcia muelleri DMIN	Candidatus Sulcia muelleri GWSS	Candidatus Sulcia muelleri SMDSEM	Clavibacter michiganensis subsp. michiganensis NCPPB 382	Clavibacter michiganensis subsp. sepedonicus	Eubacterium cylindroides T2-87	Faecalibacterium prausnitzii	Faecalibacterium prausnitzii L2-6	Leifsonia xyli subsp. xyli str. CTCB07	Ruminococcus albus 7	Tropheryma whipplei TW08/27	Tropheryma whipplei str. Twist	Enterobacter cloacae subsp. cloacae NCTC 9394
OG_00700773	cell division protein FtsZ	1272	16	1	1273	0.988354	COG1010	H		Aster yellows witches'-broom phytoplasma AYWB	Candidatus Carsonella ruddii PV	Candidatus Hodgkinia cicadicola Dsem	Candidatus Phytoplasma australiense	Candidatus Phytoplasma mali	Candidatus Sulcia muelleri CARI	Candidatus Sulcia muelleri DMIN	Candidatus Sulcia muelleri GWSS	Candidatus Sulcia muelleri SMDSEM	Candidatus Zinderia insecticola CARI	Mycoplasma mobile 163K	Onion yellows phytoplasma OY-M	Ureaplasma parvum serovar 3 str. ATCC 27815	Ureaplasma parvum serovar 3 str. ATCC 700970	Ureaplasma urealyticum serovar 10 str. ATCC 33699
OG_00804544	DNA polymerase I	1269	19	2	1271	0.986801	COG0749	L		Buchnera aphidicola str. Bp (Baizongia pistaciae)	Candidatus Carsonella ruddii PV	Candidatus Hodgkinia cicadicola Dsem	Candidatus Sulcia muelleri CARI	Candidatus Sulcia muelleri DMIN	Candidatus Sulcia muelleri GWSS	Candidatus Sulcia muelleri SMDSEM	Candidatus Zinderia insecticola CARI	Campylobacter concisus 13826	Coprococcus sp. ART55/1	Escherichia coli CFT073	Gordonibacter pamelaeae 7-10-1-b	Ruminococcus obeum	Ruminococcus sp.	Veillonella parvula DSM 2008	butyrate-producing bacterium SM4/1	butyrate-producing bacterium SSC/2
OG_00487174	protein-<glutamine-N5> methyltransferase, release factor-specific	1260	28	11	1271	0.986801	COG2890	J		Aster yellows witches'-broom phytoplasma AYWB	Candidatus Carsonella ruddii PV	Candidatus Hodgkinia cicadicola Dsem	Candidatus Phytoplasma australiense	Candidatus Phytoplasma mali	Candidatus Sulcia muelleri CARI	Candidatus Sulcia muelleri DMIN	Candidatus Sulcia muelleri GWSS	Candidatus Sulcia muelleri SMDSEM	Candidatus Zinderia insecticola CARI	Mycoplasma conjunctivae HRC/581	Onion yellows phytoplasma OY-M	Orientia tsutsugamushi str. Boryong	cyanobacterium UCYN-A	Fibrobacter succinogenes subsp. succinogenes S85	Gordonibacter pamelaeae 7-10-1-b	Ruminococcus sp. 18P13
OG_00486238	isoleucyl-tRNA synthetase	1204	84	67	1271	0.986801	COG0060	J	Isoleucyl-tRNA synthetase	Candidatus Hodgkinia cicadicola Dsem	Candidatus Sulcia muelleri DMIN	Eubacterium cylindroides T2-87	Mesoplasma florum L1	Mycoplasma arthritidis 158L3-1	Mycoplasma conjunctivae HRC/581	Mycoplasma hominis	Mycoplasma synoviae 53	Bradyrhizobium sp. BTAi1	Buchnera aphidicola str. JF98 (Acyrthosiphon pisum)	Candidatus Sulcia muelleri GWSS	Haemophilus influenzae Rd KW20	Mycoplasma pneumoniae FH	Rhodopseudomonas palustris BisB18	Rhodopseudomonas palustris DX-1	Synergistetes bacterium SGP1	Xylella fastidiosa subsp. fastidiosa GB514
OG_00804698	30S ribosomal protein S7	1268	20	2	1270	0.986025	COG0049	J	Ribosomal protein S7	Butyrivibrio fibrisolvens	Clostridium cf. saccharolyticum K10	Coprococcus catus GD/7	Coprococcus sp. ART55/1	Eubacterium rectale DSM 17629	Eubacterium rectale M104/1	Lactobacillus fermentum CECT 5716	Lactobacillus salivarius CECT 5713	Roseburia intestinalis	Ruminococcus bromii	Ruminococcus obeum	Ruminococcus sp.	Ruminococcus torques	Synergistetes bacterium SGP1	Thermoanaerobacter mathranii subsp. mathranii str. A3	butyrate-producing bacterium SM4/1	butyrate-producing bacterium SS3/4	butyrate-producing bacterium SSC/2
OG_00474462	transketolase	1217	71	53	1270	0.986025	COG0021	G		Candidatus Hodgkinia cicadicola Dsem	Candidatus Phytoplasma mali	Candidatus Zinderia insecticola CARI	Lactobacillus reuteri DSM 20016	Rickettsia africae ESF-5	Rickettsia akari str. Hartford	Rickettsia bellii OSU 85-389	Rickettsia bellii RML369-C	Rickettsia canadensis str. McKiel	Rickettsia conorii str. Malish 7	Rickettsia felis URRWXCal2	Rickettsia massiliae MTU5	Rickettsia peacockii str. Rustic	Rickettsia prowazekii Rp22	Rickettsia prowazekii str. Madrid E	Rickettsia rickettsii str. 'Sheila Smith'	Rickettsia rickettsii str. Iowa	Rickettsia typhi str. Wilmington
OG_00764224	trigger factor	1265	23	4	1269	0.985248	COG0544	O		Alteromonas macleodii 'Deep ecotype'	Blattabacterium sp. (Blattella germanica) str. Bge	Blattabacterium sp. (Periplaneta americana) str. BPLAN	Borrelia burgdorferi ZS7	Buchnera aphidicola str. Bp (Baizongia pistaciae)	Buchnera aphidicola str. Cc (Cinara cedri)	Candidatus Blochmannia floridanus	Candidatus Blochmannia pennsylvanicus str. BPEN	Candidatus Carsonella ruddii PV	Candidatus Hodgkinia cicadicola Dsem	Candidatus Riesia pediculicola USDA	Candidatus Sulcia muelleri DMIN	Candidatus Sulcia muelleri GWSS	Candidatus Sulcia muelleri SMDSEM	Candidatus Zinderia insecticola CARI	Synergistetes bacterium SGP1	butyrate-producing bacterium SM4/1	Candidatus Sulcia muelleri CARI	Leptospira biflexa serovar Patoc strain 'Patoc 1 (Ames)'
OG_00486525	valyl-tRNA synthetase	1267	21	1	1268	0.984472	COG0525	J	Valyl-tRNA synthetase	Mesoplasma florum L1	Mycoplasma agalactiae PG2	Mycoplasma capricolum subsp. capricolum ATCC 27343	Mycoplasma conjunctivae HRC/581	Mycoplasma crocodyli MP145	Mycoplasma fermentans JER	Mycoplasma fermentans PG18	Mycoplasma hyorhinis HUB-1	Mycoplasma leachii PG50	Mycoplasma mycoides subsp. capri str. GM12 (deltatypeIIIres clone)	Mycoplasma mycoides subsp. capri str. GM12 (tetM-lacZ clone)	Mycoplasma mycoides subsp. mycoides SC str. Gladysdale	Mycoplasma mycoides subsp. mycoides SC str. PG1	Mycoplasma penetrans HF-2	Mycoplasma pulmonis UAB CTIP	Mycoplasma synoviae 53	Ureaplasma parvum serovar 3 str. ATCC 27815	Ureaplasma parvum serovar 3 str. ATCC 700970	Candidatus Hodgkinia cicadicola Dsem	Ureaplasma urealyticum serovar 10 str. ATCC 33699
OG_00802676	chromosomal replication initiation protein	1264	24	4	1268	0.984472	COG0593	L		'Nostoc azollae' 0708	Baumannia cicadellinicola str. Hc (Homalodisca coagulata)	Blattabacterium sp. (Blattella germanica) str. Bge	Blattabacterium sp. (Periplaneta americana) str. BPLAN	Candidatus Blochmannia floridanus	Candidatus Blochmannia pennsylvanicus str. BPEN	Candidatus Carsonella ruddii PV	Candidatus Hodgkinia cicadicola Dsem	Candidatus Riesia pediculicola USDA	Candidatus Sulcia muelleri CARI	Candidatus Sulcia muelleri DMIN	Candidatus Sulcia muelleri GWSS	Candidatus Sulcia muelleri SMDSEM	Candidatus Zinderia insecticola CARI	Fusobacterium nucleatum subsp. nucleatum ATCC 25586	Ilyobacter polytropus DSM 2926	Wigglesworthia glossinidia endosymbiont of Glossina brevipalpis	cyanobacterium UCYN-A	Escherichia coli CFT073	uncultured Termite group 1 bacterium phylotype Rs-D17
OG_00485818	GrpE protein	1263	25	4	1267	0.983696	COG0576	O		Acinetobacter baumannii SDF	Alistipes shahii WAL 8301	Buchnera aphidicola str. Cc (Cinara cedri)	Candidatus Hodgkinia cicadicola Dsem	Candidatus Sulcia muelleri SMDSEM	Coprococcus catus GD/7	Enterococcus sp. 7L76	Eubacterium cylindroides T2-87	Eubacterium siraeum	Eubacterium siraeum V10Sc8a	Lactobacillus helveticus DPC 4571	Ruminococcus torques	Synergistetes bacterium SGP1	Ureaplasma parvum serovar 3 str. ATCC 27815	Ureaplasma parvum serovar 3 str. ATCC 700970	Ureaplasma urealyticum serovar 10 str. ATCC 33699	butyrate-producing bacterium SM4/1	butyrate-producing bacterium SS3/4	Clostridium cf. saccharolyticum K10	Ruminococcus obeum	Ruminococcus sp.
OG_00803199	50S ribosomal protein L20	1262	26	5	1267	0.983696	COG0292	J		Candidatus Carsonella ruddii PV	Mycoplasma agalactiae PG2	Mycoplasma arthritidis 158L3-1	Mycoplasma bovis PG45	Mycoplasma conjunctivae HRC/581	Mycoplasma crocodyli MP145	Mycoplasma fermentans JER	Mycoplasma fermentans PG18	Mycoplasma hominis	Mycoplasma hyopneumoniae 168	Mycoplasma hyopneumoniae 232	Mycoplasma hyopneumoniae 7448	Mycoplasma hyopneumoniae J	Mycoplasma hyorhinis HUB-1	Mycoplasma mobile 163K	Mycoplasma penetrans HF-2	Mycoplasma pulmonis UAB CTIP	Mycoplasma synoviae 53	Ureaplasma parvum serovar 3 str. ATCC 27815	Ureaplasma parvum serovar 3 str. ATCC 700970	Ureaplasma urealyticum serovar 10 str. ATCC 33699
OG_00486957	Signal recognition particle protein	1257	31	10	1267	0.983696	COG0541	N		Candidatus Carsonella ruddii PV	Candidatus Hodgkinia cicadicola Dsem	Candidatus Sulcia muelleri CARI	Candidatus Sulcia muelleri DMIN	Candidatus Sulcia muelleri GWSS	Candidatus Sulcia muelleri SMDSEM	Candidatus Zinderia insecticola CARI	Dehalococcoides ethenogenes 195	Dehalococcoides sp. BAV1	Dehalococcoides sp. CBDB1	Dehalococcoides sp. GT	Dehalococcoides sp. VS	Dehalogenimonas lykanthroporepellens BL-DC-9	Elusimicrobium minutum Pei191	Leptospira biflexa serovar Patoc strain 'Patoc 1 (Ames)'	Leptospira biflexa serovar Patoc strain 'Patoc 1 (Paris)'	Leptospira borgpetersenii serovar Hardjo-bovis JB197	Leptospira borgpetersenii serovar Hardjo-bovis L550	Leptospira interrogans serovar Copenhageni str. Fiocruz L1-130	Leptospira interrogans serovar Lai str. 56601	uncultured Termite group 1 bacterium phylotype Rs-D17
OG_00486694	recombinase A	1259	29	7	1266	0.982919	COG0468	L		Aster yellows witches'-broom phytoplasma AYWB	Buchnera aphidicola str. 5A (Acyrthosiphon pisum)	Buchnera aphidicola str. APS (Acyrthosiphon pisum)	Buchnera aphidicola str. Bp (Baizongia pistaciae)	Buchnera aphidicola str. Cc (Cinara cedri)	Buchnera aphidicola str. JF98 (Acyrthosiphon pisum)	Buchnera aphidicola str. JF99 (Acyrthosiphon pisum)	Buchnera aphidicola str. LL01 (Acyrthosiphon pisum)	Buchnera aphidicola str. Sg (Schizaphis graminum)	Buchnera aphidicola str. TLW03 (Acyrthosiphon pisum)	Buchnera aphidicola str. Tuc7 (Acyrthosiphon pisum)	Candidatus Blochmannia floridanus	Candidatus Blochmannia pennsylvanicus str. BPEN	Candidatus Hodgkinia cicadicola Dsem	Candidatus Phytoplasma australiense	Candidatus Ruthia magnifica str. Cm (Calyptogena magnifica)	Candidatus Sulcia muelleri CARI	Candidatus Sulcia muelleri DMIN	Candidatus Sulcia muelleri GWSS	Candidatus Sulcia muelleri SMDSEM	Candidatus Vesicomyosocius okutanii HA	Candidatus Zinderia insecticola CARI
OG_00804278	ribonuclease III	1258	30	8	1266	0.982919	COG0571	K		Alistipes shahii WAL 8301	Candidatus Carsonella ruddii PV	Candidatus Hodgkinia cicadicola Dsem	Candidatus Sulcia muelleri CARI	Candidatus Sulcia muelleri DMIN	Candidatus Sulcia muelleri GWSS	Candidatus Sulcia muelleri SMDSEM	Coprothermobacter proteolyticus DSM 5265	Deinococcus deserti VCD115	Deinococcus geothermalis DSM 11300	Deinococcus radiodurans R1	Desulfobacterium autotrophicum HRM2	Eubacterium cylindroides T2-87	Gemmatimonas aurantiaca T-27	Meiothermus ruber DSM 1279	Meiothermus silvanus DSM 9946	Oceanithermus profundus DSM 14977	Thermodesulfovibrio yellowstonii DSM 11347	Thermosynechococcus elongatus BP-1	Thermus thermophilus HB27	Thermus thermophilus HB8	Truepera radiovictrix DSM 17093
OG_00095538	Hydrolase, TatD family	1204	84	62	1266	0.982919	COG0084	L		Alistipes shahii WAL 8301	Candidatus Carsonella ruddii PV	Candidatus Hodgkinia cicadicola Dsem	Candidatus Sulcia muelleri CARI	Candidatus Sulcia muelleri DMIN	Candidatus Sulcia muelleri GWSS	Candidatus Sulcia muelleri SMDSEM	Candidatus Zinderia insecticola CARI	Eubacterium cylindroides T2-87	Eubacterium siraeum	Faecalibacterium prausnitzii	Faecalibacterium prausnitzii L2-6	Ruminococcus albus 7	cyanobacterium UCYN-A	Butyrivibrio fibrisolvens	Clostridium saccharolyticum WM1	Coprococcus catus GD/7	Ethanoligenens harbinense YUAN-3	Eubacterium limosum KIST612	Roseburia intestinalis	Ruminococcus sp.	Ruminococcus sp. 18P13
OG_00487027	DNA ligase, NAD-dependent	1256	32	9	1265	0.982143	COG0272	L		Candidatus Carsonella ruddii PV	Candidatus Hodgkinia cicadicola Dsem	Candidatus Sulcia muelleri CARI	Candidatus Sulcia muelleri DMIN	Candidatus Sulcia muelleri GWSS	Candidatus Sulcia muelleri SMDSEM	Candidatus Zinderia insecticola CARI	Dictyoglomus thermophilum H-6-12	Dictyoglomus turgidum DSM 6724	Hydrogenobacter thermophilus TK-6	Hydrogenobacter thermophilus TK-6	Prochlorococcus marinus str. AS9601	Prochlorococcus marinus str. MIT 9215	Prochlorococcus marinus str. MIT 9301	Prochlorococcus marinus str. MIT 9312	Prochlorococcus marinus str. MIT 9515	Prochlorococcus marinus subsp. pastoris str. CCMP1986	Thermobaculum terrenum ATCC BAA-798	Thermocrinis albus DSM 14484	butyrate-producing bacterium SM4/1	Eubacterium cylindroides T2-87	Ketogulonicigenium vulgare Y25	Shigella boydii CDC 3083-94
OG_00486359	phosphoglycerate kinase	1261	27	3	1264	0.981366	COG0126	G		Candidatus Carsonella ruddii PV	Candidatus Hodgkinia cicadicola Dsem	Candidatus Phytoplasma mali	Candidatus Sulcia muelleri CARI	Candidatus Sulcia muelleri DMIN	Candidatus Sulcia muelleri GWSS	Candidatus Sulcia muelleri SMDSEM	Candidatus Zinderia insecticola CARI	Lactobacillus reuteri DSM 20016	Rickettsia africae ESF-5	Rickettsia akari str. Hartford	Rickettsia bellii OSU 85-389	Rickettsia bellii RML369-C	Rickettsia canadensis str. McKiel	Rickettsia conorii str. Malish 7	Rickettsia felis URRWXCal2	Rickettsia massiliae MTU5	Rickettsia peacockii str. Rustic	Rickettsia prowazekii Rp22	Rickettsia prowazekii str. Madrid E	Rickettsia rickettsii str. 'Sheila Smith'	Rickettsia rickettsii str. Iowa	Rickettsia typhi str. Wilmington	Vibrio splendidus LGP32
OG_00486027	signal recognition particle-docking protein FtsY	1261	27	3	1264	0.981366	COG0552	N		Candidatus Carsonella ruddii PV	Candidatus Sulcia muelleri CARI	Candidatus Sulcia muelleri DMIN	Candidatus Sulcia muelleri GWSS	Candidatus Zinderia insecticola CARI	Dehalococcoides ethenogenes 195	Dehalococcoides sp. BAV1	Dehalococcoides sp. CBDB1	Dehalococcoides sp. GT	Dehalococcoides sp. VS	Dehalogenimonas lykanthroporepellens BL-DC-9	Elusimicrobium minutum Pei191	Leptospira biflexa serovar Patoc strain 'Patoc 1 (Ames)'	Leptospira biflexa serovar Patoc strain 'Patoc 1 (Paris)'	Leptospira borgpetersenii serovar Hardjo-bovis JB197	Leptospira borgpetersenii serovar Hardjo-bovis L550	Leptospira interrogans serovar Copenhageni str. Fiocruz L1-130	Leptospira interrogans serovar Lai str. 56601	butyrate-producing bacterium SM4/1	uncultured Termite group 1 bacterium phylotype Rs-D17	Candidatus Hodgkinia cicadicola Dsem	Candidatus Sulcia muelleri SMDSEM	Coprococcus sp. ART55/1	Gordonibacter pamelaeae 7-10-1-b
OG_00763822	50S ribosomal protein L16	1259	29	5	1264	0.981366	COG0197	J	Ribosomal protein L16/L10E	Coprococcus sp. ART55/1	Mesoplasma florum L1	Mycoplasma agalactiae PG2	Mycoplasma bovis PG45	Mycoplasma capricolum subsp. capricolum ATCC 27343	Mycoplasma crocodyli MP145	Mycoplasma fermentans JER	Mycoplasma fermentans PG18	Mycoplasma gallisepticum str. F	Mycoplasma gallisepticum str. R(high)	Mycoplasma gallisepticum str. R(low)	Mycoplasma hominis	Mycoplasma hyorhinis HUB-1	Mycoplasma leachii PG50	Mycoplasma mycoides subsp. capri str. GM12 (deltatypeIIIres clone)	Mycoplasma mycoides subsp. capri str. GM12 (tetM-lacZ clone)	Mycoplasma mycoides subsp. mycoides SC str. Gladysdale	Mycoplasma mycoides subsp. mycoides SC str. PG1	Mycoplasma penetrans HF-2	Mycoplasma pulmonis UAB CTIP	Mycoplasma synoviae 53	Ureaplasma parvum serovar 3 str. ATCC 27815	Ureaplasma parvum serovar 3 str. ATCC 700970	Ureaplasma urealyticum serovar 10 str. ATCC 33699
OG_00775806	tRNA pseudouridine synthase A	1250	38	14	1264	0.981366	COG0101	J		Candidatus Carsonella ruddii PV	Candidatus Hodgkinia cicadicola Dsem	Candidatus Zinderia insecticola CARI	Elusimicrobium minutum Pei191	Leptospira interrogans serovar Copenhageni str. Fiocruz L1-130	Mycoplasma agalactiae PG2	Mycoplasma arthritidis 158L3-1	Mycoplasma bovis PG45	Mycoplasma conjunctivae HRC/581	Mycoplasma crocodyli MP145	Mycoplasma fermentans JER	Mycoplasma fermentans PG18	Mycoplasma hominis	Mycoplasma hyopneumoniae 168	Mycoplasma hyopneumoniae 232	Mycoplasma hyopneumoniae 7448	Mycoplasma hyopneumoniae J	Mycoplasma hyorhinis HUB-1	Mycoplasma mobile 163K	Mycoplasma pulmonis UAB CTIP	Mycoplasma synoviae 53	Synergistetes bacterium SGP1	uncultured Termite group 1 bacterium phylotype Rs-D17	Lactobacillus fermentum CECT 5716
OG_00486996	triosephosphate isomerase	1248	40	16	1264	0.981366	COG0149	G		Bacillus cereus ATCC 14579	Candidatus Carsonella ruddii PV	Candidatus Hodgkinia cicadicola Dsem	Candidatus Sulcia muelleri CARI	Candidatus Sulcia muelleri DMIN	Candidatus Sulcia muelleri GWSS	Candidatus Sulcia muelleri SMDSEM	Candidatus Zinderia insecticola CARI	Mycoplasma crocodyli MP145	Rickettsia africae ESF-5	Rickettsia akari str. Hartford	Rickettsia bellii OSU 85-389	Rickettsia bellii RML369-C	Rickettsia canadensis str. McKiel	Rickettsia conorii str. Malish 7	Rickettsia felis URRWXCal2	Rickettsia massiliae MTU5	Rickettsia peacockii str. Rustic	Rickettsia prowazekii Rp22	Rickettsia prowazekii str. Madrid E	Rickettsia rickettsii str. 'Sheila Smith'	Rickettsia rickettsii str. Iowa	Rickettsia typhi str. Wilmington	butyrate-producing bacterium SM4/1
OG_00487322	transcription antitermination protein nusG	1260	28	3	1263	0.98059	COG0250	K		Candidatus Carsonella ruddii PV	Candidatus Hodgkinia cicadicola Dsem	Candidatus Sulcia muelleri CARI	Candidatus Sulcia muelleri DMIN	Candidatus Sulcia muelleri GWSS	Candidatus Sulcia muelleri SMDSEM	Candidatus Zinderia insecticola CARI	Mycoplasma gallisepticum str. F	Mycoplasma gallisepticum str. R(high)	Mycoplasma gallisepticum str. R(low)	Mycoplasma genitalium G37	Mycoplasma hyopneumoniae 168	Mycoplasma hyopneumoniae 232	Mycoplasma hyopneumoniae 7448	Mycoplasma hyopneumoniae J	Mycoplasma penetrans HF-2	Mycoplasma pneumoniae FH	Mycoplasma pneumoniae M129	Mycoplasma synoviae 53	Thermoanaerobacter mathranii subsp. mathranii str. A3	Ureaplasma parvum serovar 3 str. ATCC 27815	Ureaplasma parvum serovar 3 str. ATCC 700970	Ureaplasma urealyticum serovar 10 str. ATCC 33699	Buchnera aphidicola str. JF98 (Acyrthosiphon pisum)	butyrate-producing bacterium SM4/1
OG_00871666	putative inner membrane protein translocase component YidC	1258	30	5	1263	0.98059	COG0706	N		Buchnera aphidicola str. Cc (Cinara cedri)	Candidatus Carsonella ruddii PV	Candidatus Hodgkinia cicadicola Dsem	Candidatus Sulcia muelleri DMIN	Candidatus Sulcia muelleri GWSS	Candidatus Zinderia insecticola CARI	Coprococcus sp. ART55/1	Dehalococcoides sp. BAV1	Enterococcus sp. 7L76	Mesoplasma florum L1	Mycoplasma fermentans JER	Mycoplasma fermentans PG18	Mycoplasma gallisepticum str. F	Mycoplasma gallisepticum str. R(high)	Mycoplasma gallisepticum str. R(low)	Ruminococcus obeum	Ruminococcus sp. 18P13	Bacteriovorax marinus SJ	Buchnera aphidicola str. JF98 (Acyrthosiphon pisum)	Campylobacter jejuni subsp. jejuni ICDCCJ07001	Clostridium cf. saccharolyticum K10	Coprococcus catus GD/7	Haemophilus influenzae PittGG	Roseburia intestinalis	butyrate-producing bacterium SM4/1
OG_00802959	30S ribosomal protein S14	1257	31	6	1263	0.98059	COG0199	J		Bdellovibrio bacteriovorus HD100	Brachyspira hyodysenteriae WA1	Campylobacter jejuni subsp. jejuni ICDCCJ07001	Chloroflexus aggregans DSM 9485	Clostridium tetani E88	Eubacterium rectale ATCC 33656	Helicobacter acinonychis str. Sheeba	Helicobacter felis ATCC 49179	Helicobacter hepaticus ATCC 51449	Helicobacter pylori P12	Helicobacter pylori v225d	Lactobacillus acidophilus NCFM	Lactobacillus delbrueckii subsp. bulgaricus ND02	Lactobacillus fermentum CECT 5716	Lactobacillus salivarius CECT 5713	Lawsonia intracellularis PHE/MN1-00	Leptospira biflexa serovar Patoc strain 'Patoc 1 (Paris)'	Mycoplasma conjunctivae HRC/581	Mycoplasma mycoides subsp. mycoides SC str. PG1	Paenibacillus polymyxa E681	Pelotomaculum thermopropionicum SI	Roseburia intestinalis XB6B4	Ruminococcus bromii	Thermomicrobium roseum DSM 5159	Wolinella succinogenes DSM 1740
OG_00474144	DNA primase	1256	32	7	1263	0.98059	COG0358	L		Candidatus Hodgkinia cicadicola Dsem	Candidatus Sulcia muelleri DMIN	Candidatus Sulcia muelleri GWSS	Candidatus Sulcia muelleri SMDSEM	Eubacterium cylindroides T2-87	Mycoplasma agalactiae PG2	Mycoplasma bovis PG45	Mycoplasma conjunctivae HRC/581	Mycoplasma crocodyli MP145	Mycoplasma fermentans JER	Mycoplasma fermentans PG18	Mycoplasma hyopneumoniae 168	Mycoplasma hyopneumoniae 232	Mycoplasma hyopneumoniae 7448	Mycoplasma hyopneumoniae J	Mycoplasma hyorhinis HUB-1	Mycoplasma mobile 163K	Mycoplasma synoviae 53	Alteromonas macleodii 'Deep ecotype'	Buchnera aphidicola str. JF98 (Acyrthosiphon pisum)	Enterobacter cloacae subsp. cloacae NCTC 9394	Gordonibacter pamelaeae 7-10-1-b	Mycoplasma gallisepticum str. F	Mycoplasma gallisepticum str. R(high)	Mycoplasma gallisepticum str. R(low)
OG_00486409	thioredoxin reductase	1244	44	18	1262	0.979814	COG0492	O		Aster yellows witches'-broom phytoplasma AYWB	Candidatus Carsonella ruddii PV	Candidatus Phytoplasma australiense	Candidatus Phytoplasma mali	Candidatus Sulcia muelleri CARI	Candidatus Sulcia muelleri DMIN	Candidatus Sulcia muelleri GWSS	Candidatus Zinderia insecticola CARI	Cyanothece sp. ATCC 51142	Haliangium ochraceum DSM 14365	Onion yellows phytoplasma OY-M	Persephonella marina EX-H1	Sphaerobacter thermophilus DSM 20745	Sulfurihydrogenibium azorense Az-Fu1	Sulfurihydrogenibium sp. YO3AOP1	Synechococcus sp. PCC 7002	Synechocystis sp. PCC 6803	Thermomicrobium roseum DSM 5159	Tropheryma whipplei TW08/27	Tropheryma whipplei str. Twist	cyanobacterium UCYN-A	Aquifex aeolicus VF5	Buchnera aphidicola str. JF98 (Acyrthosiphon pisum)	Candidatus Hamiltonella defensa 5AT (Acyrthosiphon pisum)	Prochlorococcus marinus str. MIT 9303	Prochlorococcus marinus str. MIT 9313
OG_00487014	chaperonin GroEL	1188	100	74	1262	0.979814	COG0459	O		Mesoplasma florum L1	Mycoplasma agalactiae PG2	Mycoplasma arthritidis 158L3-1	Mycoplasma bovis PG45	Mycoplasma capricolum subsp. capricolum ATCC 27343	Mycoplasma conjunctivae HRC/581	Mycoplasma crocodyli MP145	Mycoplasma fermentans JER	Mycoplasma fermentans PG18	Mycoplasma hominis	Mycoplasma hyopneumoniae 168	Mycoplasma hyopneumoniae 232	Mycoplasma hyopneumoniae 7448	Mycoplasma hyopneumoniae J	Mycoplasma hyorhinis HUB-1	Mycoplasma leachii PG50	Mycoplasma mobile 163K	Mycoplasma mycoides subsp. capri str. GM12 (deltatypeIIIres clone)	Mycoplasma mycoides subsp. capri str. GM12 (tetM-lacZ clone)	Mycoplasma mycoides subsp. mycoides SC str. Gladysdale	Mycoplasma mycoides subsp. mycoides SC str. PG1	Mycoplasma pulmonis UAB CTIP	Mycoplasma synoviae 53	Ureaplasma parvum serovar 3 str. ATCC 27815	Ureaplasma parvum serovar 3 str. ATCC 700970	Ureaplasma urealyticum serovar 10 str. ATCC 33699
OG_00871578	phenylalanyl-tRNA synthetase subunit beta	1257	31	4	1261	0.979037	COG0072	J		Borrelia afzelii PKo	Borrelia burgdorferi B31	Borrelia burgdorferi JD1	Borrelia burgdorferi N40	Borrelia burgdorferi ZS7	Borrelia duttonii Ly	Borrelia garinii PBi	Borrelia hermsii DAH	Borrelia recurrentis A1	Borrelia turicatae 91E135	Buchnera aphidicola str. Cc (Cinara cedri)	Candidatus Carsonella ruddii PV	Candidatus Hodgkinia cicadicola Dsem	Candidatus Nitrospira defluvii	Candidatus Zinderia insecticola CARI	Spirochaeta smaragdinae DSM 11293	Spirochaeta thermophila DSM 6192	Treponema denticola ATCC 35405	Treponema pallidum subsp. pallidum SS14	Treponema pallidum subsp. pallidum str. Chicago	Treponema pallidum subsp. pallidum str. Nichols	Buchnera aphidicola str. TLW03 (Acyrthosiphon pisum)	Campylobacter concisus 13826	Caulobacter segnis ATCC 21756	Escherichia coli CFT073	Gordonibacter pamelaeae 7-10-1-b	Synergistetes bacterium SGP1
OG_00120621	tRNA-specific 2-thiouridylase MnmA	1254	34	6	1260	0.978261	COG0482	J		Arcanobacterium haemolyticum DSM 20595	Bifidobacterium adolescentis ATCC 15703	Bifidobacterium animalis subsp. lactis AD011	Bifidobacterium animalis subsp. lactis BB-12	Bifidobacterium animalis subsp. lactis Bl-04	Bifidobacterium animalis subsp. lactis DSM 10140	Bifidobacterium animalis subsp. lactis V9	Bifidobacterium bifidum PRL2010	Bifidobacterium bifidum S17	Bifidobacterium dentium Bd1	Bifidobacterium longum DJO10A	Bifidobacterium longum NCC2705	Bifidobacterium longum subsp. infantis ATCC 15697	Bifidobacterium longum subsp. longum BBMN68	Bifidobacterium longum subsp. longum F8	Bifidobacterium longum subsp. longum JDM301	Candidatus Hodgkinia cicadicola Dsem	Gardnerella vaginalis 409-05	Gardnerella vaginalis ATCC 14019	Leuconostoc citreum KM20	Leuconostoc gasicomitatum LMG 18811	Leuconostoc kimchii IMSNU 11154	Leuconostoc mesenteroides subsp. mesenteroides ATCC 8293	Oenococcus oeni PSU-1	Treponema pallidum subsp. pallidum SS14	Treponema pallidum subsp. pallidum str. Chicago	Treponema pallidum subsp. pallidum str. Nichols	Gordonibacter pamelaeae 7-10-1-b
OG_00486637	ATP-dependent chaperone ClpB	1257	31	2	1259	0.977484	COG0542	O		Aster yellows witches'-broom phytoplasma AYWB	Buchnera aphidicola str. 5A (Acyrthosiphon pisum)	Buchnera aphidicola str. APS (Acyrthosiphon pisum)	Buchnera aphidicola str. Bp (Baizongia pistaciae)	Buchnera aphidicola str. Cc (Cinara cedri)	Buchnera aphidicola str. JF98 (Acyrthosiphon pisum)	Buchnera aphidicola str. JF99 (Acyrthosiphon pisum)	Buchnera aphidicola str. LL01 (Acyrthosiphon pisum)	Buchnera aphidicola str. Sg (Schizaphis graminum)	Buchnera aphidicola str. TLW03 (Acyrthosiphon pisum)	Buchnera aphidicola str. Tuc7 (Acyrthosiphon pisum)	Candidatus Carsonella ruddii PV	Candidatus Hodgkinia cicadicola Dsem	Candidatus Pelagibacter ubique HTCC1062	Candidatus Phytoplasma australiense	Candidatus Phytoplasma mali	Candidatus Riesia pediculicola USDA	Candidatus Sulcia muelleri CARI	Candidatus Sulcia muelleri DMIN	Candidatus Sulcia muelleri GWSS	Candidatus Sulcia muelleri SMDSEM	Candidatus Zinderia insecticola CARI	Mycoplasma crocodyli MP145	Mycoplasma pulmonis UAB CTIP	Mycoplasma synoviae 53	Onion yellows phytoplasma OY-M	Orientia tsutsugamushi str. Boryong	Orientia tsutsugamushi str. Ikeda	Wigglesworthia glossinidia endosymbiont of Glossina brevipalpis
OG_00487043	guanylate kinase	1252	36	7	1259	0.977484	COG0194	F		Borrelia afzelii PKo	Borrelia burgdorferi B31	Borrelia burgdorferi JD1	Borrelia burgdorferi N40	Borrelia burgdorferi ZS7	Borrelia duttonii Ly	Borrelia garinii PBi	Borrelia hermsii DAH	Borrelia recurrentis A1	Borrelia turicatae 91E135	Buchnera aphidicola str. Cc (Cinara cedri)	Candidatus Amoebophilus asiaticus 5a2	Candidatus Carsonella ruddii PV	Candidatus Hodgkinia cicadicola Dsem	Candidatus Sulcia muelleri CARI	Candidatus Sulcia muelleri DMIN	Candidatus Sulcia muelleri GWSS	Candidatus Sulcia muelleri SMDSEM	Candidatus Zinderia insecticola CARI	Clostridium phytofermentans ISDg	Eubacterium cylindroides T2-87	Spirochaeta smaragdinae DSM 11293	Spirochaeta thermophila DSM 6192	Treponema denticola ATCC 35405	Treponema pallidum subsp. pallidum SS14	Treponema pallidum subsp. pallidum str. Chicago	Treponema pallidum subsp. pallidum str. Nichols	Streptomyces bingchenggensis BCW-1	butyrate-producing bacterium SM4/1
OG_00804361	phosphatidate cytidylyltransferase	1251	37	7	1258	0.976708	COG0575	I		Buchnera aphidicola str. 5A (Acyrthosiphon pisum)	Buchnera aphidicola str. APS (Acyrthosiphon pisum)	Buchnera aphidicola str. Bp (Baizongia pistaciae)	Buchnera aphidicola str. Cc (Cinara cedri)	Buchnera aphidicola str. JF98 (Acyrthosiphon pisum)	Buchnera aphidicola str. JF99 (Acyrthosiphon pisum)	Buchnera aphidicola str. LL01 (Acyrthosiphon pisum)	Buchnera aphidicola str. Sg (Schizaphis graminum)	Buchnera aphidicola str. TLW03 (Acyrthosiphon pisum)	Buchnera aphidicola str. Tuc7 (Acyrthosiphon pisum)	Candidatus Carsonella ruddii PV	Candidatus Hodgkinia cicadicola Dsem	Candidatus Sulcia muelleri CARI	Candidatus Sulcia muelleri DMIN	Candidatus Sulcia muelleri GWSS	Candidatus Sulcia muelleri SMDSEM	Candidatus Zinderia insecticola CARI	Mycoplasma capricolum subsp. capricolum ATCC 27343	Mycoplasma genitalium G37	Mycoplasma hominis	Mycoplasma mycoides subsp. capri str. GM12 (deltatypeIIIres clone)	Mycoplasma mycoides subsp. capri str. GM12 (tetM-lacZ clone)	Mycoplasma mycoides subsp. mycoides SC str. Gladysdale	Mycoplasma mycoides subsp. mycoides SC str. PG1	Mycoplasma synoviae 53	Pirellula staleyi DSM 6068	butyrate-producing bacterium SM4/1	Candidatus Amoebophilus asiaticus 5a2	Parvibaculum lavamentivorans DS-1	Planctomyces limnophilus DSM 3776
OG_00084244	UvrD/REP helicase	1167	121	89	1256	0.975155	COG0210	L		Candidatus Blochmannia floridanus	Candidatus Carsonella ruddii PV	Candidatus Hodgkinia cicadicola Dsem	Candidatus Sulcia muelleri DMIN	Candidatus Sulcia muelleri GWSS	Candidatus Sulcia muelleri SMDSEM	Candidatus Zinderia insecticola CARI	Kosmotoga olearia TBF 19.5.1	Thermosipho africanus TCF52B	Thermosipho melanesiensis BI429	Thermotoga lettingae TMO	Thermotoga maritima MSB8	Thermotoga naphthophila RKU-10	Thermotoga neapolitana DSM 4359	Thermotoga petrophila RKU-1	Thermotoga sp. RQ2	Candidatus Blochmannia pennsylvanicus str. BPEN	Clostridium cf. saccharolyticum K10	Desulfarculus baarsii DSM 2075	Desulfobacterium autotrophicum HRM2	Desulfococcus oleovorans Hxd3	Desulfovibrio vulgaris DP4	Desulfovibrio vulgaris str. 'Miyazaki F'	Desulfurivibrio alkaliphilus AHT2	Fervidobacterium nodosum Rt17-B1	Ketogulonicigenium vulgare Y25	Methylacidiphilum infernorum V4	Opitutus terrae PB90-1	Petrotoga mobilis SJ95	Syntrophobacter fumaroxidans MPOB	Thermocrinis albus DSM 14484	butyrate-producing bacterium SM4/1
OG_00084320	Holliday junction DNA helicase RuvB	1248	40	6	1254	0.973602	COG2255	L		Aquifex aeolicus VF5	Aster yellows witches'-broom phytoplasma AYWB	Buchnera aphidicola str. 5A (Acyrthosiphon pisum)	Buchnera aphidicola str. APS (Acyrthosiphon pisum)	Buchnera aphidicola str. Bp (Baizongia pistaciae)	Buchnera aphidicola str. Cc (Cinara cedri)	Buchnera aphidicola str. JF98 (Acyrthosiphon pisum)	Buchnera aphidicola str. JF99 (Acyrthosiphon pisum)	Buchnera aphidicola str. LL01 (Acyrthosiphon pisum)	Buchnera aphidicola str. Sg (Schizaphis graminum)	Buchnera aphidicola str. TLW03 (Acyrthosiphon pisum)	Buchnera aphidicola str. Tuc7 (Acyrthosiphon pisum)	Candidatus Blochmannia floridanus	Candidatus Blochmannia pennsylvanicus str. BPEN	Candidatus Carsonella ruddii PV	Candidatus Hodgkinia cicadicola Dsem	Candidatus Pelagibacter ubique HTCC1062	Candidatus Phytoplasma australiense	Candidatus Riesia pediculicola USDA	Candidatus Ruthia magnifica str. Cm (Calyptogena magnifica)	Candidatus Sulcia muelleri CARI	Candidatus Sulcia muelleri DMIN	Candidatus Sulcia muelleri GWSS	Candidatus Sulcia muelleri SMDSEM	Candidatus Zinderia insecticola CARI	Desulfotalea psychrophila LSv54	Hydrogenobacter thermophilus TK-6	Hydrogenobacter thermophilus TK-6	Hydrogenobaculum sp. Y04AAS1	Mycoplasma capricolum subsp. capricolum ATCC 27343	Onion yellows phytoplasma OY-M	Thermocrinis albus DSM 14484	Wigglesworthia glossinidia endosymbiont of Glossina brevipalpis	butyrate-producing bacterium SM4/1
OG_00871498	serine hydroxymethyltransferase	1247	41	6	1253	0.972826	COG0112	E		Atopobium parvulum DSM 20469	Bifidobacterium animalis subsp. lactis AD011	Bifidobacterium animalis subsp. lactis BB-12	Bifidobacterium animalis subsp. lactis Bl-04	Bifidobacterium animalis subsp. lactis DSM 10140	Bifidobacterium animalis subsp. lactis V9	Bifidobacterium bifidum PRL2010	Bifidobacterium bifidum S17	Blattabacterium sp. (Blattella germanica) str. Bge	Blattabacterium sp. (Periplaneta americana) str. BPLAN	Candidatus Sulcia muelleri CARI	Candidatus Sulcia muelleri DMIN	Candidatus Sulcia muelleri GWSS	Candidatus Sulcia muelleri SMDSEM	Candidatus Zinderia insecticola CARI	Clostridiales genomosp. BVAB3 str. UPII9-5	Clostridium cf. saccharolyticum K10	Clostridium tetani E88	Faecalibacterium prausnitzii L2-6	Fusobacterium nucleatum subsp. nucleatum ATCC 25586	Gardnerella vaginalis 409-05	Gardnerella vaginalis ATCC 14019	Haemophilus ducreyi 35000HP	Lactobacillus delbrueckii subsp. bulgaricus ATCC 11842	Lactobacillus delbrueckii subsp. bulgaricus ATCC BAA-365	Lactobacillus delbrueckii subsp. bulgaricus ND02	Olsenella uli DSM 7084	Ruminococcus obeum	Ruminococcus sp.	Ureaplasma parvum serovar 3 str. ATCC 27815	Ureaplasma parvum serovar 3 str. ATCC 700970	Ureaplasma urealyticum serovar 10 str. ATCC 33699	butyrate-producing bacterium SM4/1	butyrate-producing bacterium SS3/4	Streptobacillus moniliformis DSM 12112
OG_00486948	co-chaperonin GroES	1239	49	14	1253	0.972826	COG0234	O		Candidatus Hodgkinia cicadicola Dsem	Mesoplasma florum L1	Mycoplasma agalactiae PG2	Mycoplasma arthritidis 158L3-1	Mycoplasma bovis PG45	Mycoplasma capricolum subsp. capricolum ATCC 27343	Mycoplasma conjunctivae HRC/581	Mycoplasma crocodyli MP145	Mycoplasma fermentans JER	Mycoplasma fermentans PG18	Mycoplasma gallisepticum str. F	Mycoplasma gallisepticum str. R(high)	Mycoplasma gallisepticum str. R(low)	Mycoplasma genitalium G37	Mycoplasma hominis	Mycoplasma hyopneumoniae 168	Mycoplasma hyopneumoniae 232	Mycoplasma hyopneumoniae 7448	Mycoplasma hyopneumoniae J	Mycoplasma hyorhinis HUB-1	Mycoplasma leachii PG50	Mycoplasma mobile 163K	Mycoplasma mycoides subsp. capri str. GM12 (deltatypeIIIres clone)	Mycoplasma mycoides subsp. capri str. GM12 (tetM-lacZ clone)	Mycoplasma mycoides subsp. mycoides SC str. Gladysdale	Mycoplasma mycoides subsp. mycoides SC str. PG1	Mycoplasma pneumoniae FH	Mycoplasma pneumoniae M129	Mycoplasma pulmonis UAB CTIP	Mycoplasma synoviae 53	Ureaplasma parvum serovar 3 str. ATCC 27815	Ureaplasma parvum serovar 3 str. ATCC 700970	Ureaplasma urealyticum serovar 10 str. ATCC 33699	butyrate-producing bacterium SM4/1	Lysinibacillus sphaericus C3-41
OG_00379159	Excinuclease ABC subunit B	1248	40	4	1252	0.97205	COG0556	L		Baumannia cicadellinicola str. Hc (Homalodisca coagulata)	Blattabacterium sp. (Blattella germanica) str. Bge	Blattabacterium sp. (Periplaneta americana) str. BPLAN	Buchnera aphidicola str. 5A (Acyrthosiphon pisum)	Buchnera aphidicola str. APS (Acyrthosiphon pisum)	Buchnera aphidicola str. Bp (Baizongia pistaciae)	Buchnera aphidicola str. Cc (Cinara cedri)	Buchnera aphidicola str. JF98 (Acyrthosiphon pisum)	Buchnera aphidicola str. JF99 (Acyrthosiphon pisum)	Buchnera aphidicola str. LL01 (Acyrthosiphon pisum)	Buchnera aphidicola str. Sg (Schizaphis graminum)	Buchnera aphidicola str. TLW03 (Acyrthosiphon pisum)	Buchnera aphidicola str. Tuc7 (Acyrthosiphon pisum)	Candidatus Blochmannia floridanus	Candidatus Blochmannia pennsylvanicus str. BPEN	Candidatus Carsonella ruddii PV	Candidatus Hodgkinia cicadicola Dsem	Candidatus Phytoplasma mali	Candidatus Riesia pediculicola USDA	Candidatus Sulcia muelleri CARI	Candidatus Sulcia muelleri DMIN	Candidatus Sulcia muelleri GWSS	Candidatus Sulcia muelleri SMDSEM	Candidatus Vesicomyosocius okutanii HA	Candidatus Zinderia insecticola CARI	Ehrlichia canis str. Jake	Ehrlichia chaffeensis str. Arkansas	Ehrlichia ruminantium str. Gardel	Ehrlichia ruminantium str. Welgevonden	Ehrlichia ruminantium str. Welgevonden	Neorickettsia risticii str. Illinois	Neorickettsia sennetsu str. Miyayama	Orientia tsutsugamushi str. Boryong	Orientia tsutsugamushi str. Ikeda	Wigglesworthia glossinidia endosymbiont of Glossina brevipalpis	Haemophilus influenzae PittEE
OG_00802543	CTP synthetase	1247	41	4	1251	0.971273	COG0504	F		Alkaliphilus oremlandii OhILAs	Anaerococcus prevotii DSM 20548	Arcanobacterium haemolyticum DSM 20595	Buchnera aphidicola str. Cc (Cinara cedri)	Candidatus Amoebophilus asiaticus 5a2	Candidatus Carsonella ruddii PV	Candidatus Hodgkinia cicadicola Dsem	Candidatus Sulcia muelleri CARI	Candidatus Sulcia muelleri DMIN	Candidatus Sulcia muelleri GWSS	Candidatus Sulcia muelleri SMDSEM	Candidatus Zinderia insecticola CARI	Clostridiales genomosp. BVAB3 str. UPII9-5	Clostridium difficile 630	Clostridium difficile CD196	Clostridium difficile R20291	Clostridium sticklandii DSM 519	Clostridium tetani E88	Corynebacterium aurimucosum ATCC 700975	Corynebacterium diphtheriae NCTC 13129	Corynebacterium pseudotuberculosis 1002	Corynebacterium pseudotuberculosis C231	Corynebacterium pseudotuberculosis FRC41	Corynebacterium pseudotuberculosis I19	Corynebacterium urealyticum DSM 7109	Fusobacterium nucleatum subsp. nucleatum ATCC 25586	Mobiluncus curtisii ATCC 43063	Mycoplasma genitalium G37	Mycoplasma hominis	Mycoplasma pneumoniae FH	Mycoplasma pneumoniae M129	Mycoplasma synoviae 53	Orientia tsutsugamushi str. Boryong	Orientia tsutsugamushi str. Ikeda	Rickettsia akari str. Hartford	Rickettsia canadensis str. McKiel	butyrate-producing bacterium SM4/1
OG_00486028	methyltransferase	1243	45	7	1250	0.970497	COG0742	L		Aquifex aeolicus VF5	Baumannia cicadellinicola str. Hc (Homalodisca coagulata)	Blattabacterium sp. (Blattella germanica) str. Bge	Blattabacterium sp. (Periplaneta americana) str. BPLAN	Candidatus Amoebophilus asiaticus 5a2	Candidatus Azobacteroides pseudotrichonymphae genomovar. CFP2	Candidatus Carsonella ruddii PV	Candidatus Hodgkinia cicadicola Dsem	Candidatus Sulcia muelleri CARI	Candidatus Sulcia muelleri DMIN	Candidatus Sulcia muelleri SMDSEM	Candidatus Zinderia insecticola CARI	Cytophaga hutchinsonii ATCC 33406	Dyadobacter fermentans DSM 18053	Gordonibacter pamelaeae 7-10-1-b	Leadbetterella byssophila DSM 17132	Leptospira biflexa serovar Patoc strain 'Patoc 1 (Ames)'	Leptospira biflexa serovar Patoc strain 'Patoc 1 (Paris)'	Leptospira borgpetersenii serovar Hardjo-bovis JB197	Leptospira borgpetersenii serovar Hardjo-bovis L550	Leptospira interrogans serovar Copenhageni str. Fiocruz L1-130	Leptospira interrogans serovar Lai str. 56601	Marivirga tractuosa DSM 4126	Mycoplasma gallisepticum str. F	Mycoplasma gallisepticum str. R(high)	Mycoplasma gallisepticum str. R(low)	Mycoplasma genitalium G37	Mycoplasma penetrans HF-2	Mycoplasma pneumoniae FH	Mycoplasma pneumoniae M129	Spirosoma linguale DSM 74	Synergistetes bacterium SGP1	Ureaplasma parvum serovar 3 str. ATCC 27815	Ureaplasma parvum serovar 3 str. ATCC 700970	Ureaplasma urealyticum serovar 10 str. ATCC 33699	butyrate-producing bacterium SM4/1	Coprococcus sp. ART55/1	Lactobacillus fermentum CECT 5716
OG_00006771	signal peptidase I	1243	45	7	1250	0.970497	COG0681	N		Acholeplasma laidlawii PG-8A	Aster yellows witches'-broom phytoplasma AYWB	Buchnera aphidicola str. Cc (Cinara cedri)	Candidatus Carsonella ruddii PV	Candidatus Hodgkinia cicadicola Dsem	Candidatus Phytoplasma australiense	Candidatus Phytoplasma mali	Candidatus Zinderia insecticola CARI	Mesoplasma florum L1	Mycoplasma agalactiae PG2	Mycoplasma arthritidis 158L3-1	Mycoplasma bovis PG45	Mycoplasma capricolum subsp. capricolum ATCC 27343	Mycoplasma crocodyli MP145	Mycoplasma fermentans JER	Mycoplasma fermentans PG18	Mycoplasma genitalium G37	Mycoplasma hominis	Mycoplasma hyorhinis HUB-1	Mycoplasma leachii PG50	Mycoplasma mobile 163K	Mycoplasma mycoides subsp. capri str. GM12 (deltatypeIIIres clone)	Mycoplasma mycoides subsp. capri str. GM12 (tetM-lacZ clone)	Mycoplasma mycoides subsp. mycoides SC str. Gladysdale	Mycoplasma mycoides subsp. mycoides SC str. PG1	Mycoplasma penetrans HF-2	Mycoplasma pneumoniae FH	Mycoplasma pneumoniae M129	Onion yellows phytoplasma OY-M	Pirellula staleyi DSM 6068	Planctomyces limnophilus DSM 3776	Sphingomonas wittichii RW1	Treponema pallidum subsp. pallidum SS14	Treponema pallidum subsp. pallidum str. Chicago	Treponema pallidum subsp. pallidum str. Nichols	Ureaplasma parvum serovar 3 str. ATCC 27815	Ureaplasma parvum serovar 3 str. ATCC 700970	Ureaplasma urealyticum serovar 10 str. ATCC 33699
OG_00828262	prolipoprotein diacylglyceryl transferase	1248	40	1	1249	0.96972	COG0682	M		Aster yellows witches'-broom phytoplasma AYWB	Buchnera aphidicola str. Cc (Cinara cedri)	Candidatus Carsonella ruddii PV	Candidatus Hodgkinia cicadicola Dsem	Candidatus Phytoplasma australiense	Candidatus Phytoplasma mali	Candidatus Zinderia insecticola CARI	Leuconostoc gasicomitatum LMG 18811	Leuconostoc kimchii IMSNU 11154	Leuconostoc mesenteroides subsp. mesenteroides ATCC 8293	Mesoplasma florum L1	Mycoplasma agalactiae PG2	Mycoplasma arthritidis 158L3-1	Mycoplasma bovis PG45	Mycoplasma capricolum subsp. capricolum ATCC 27343	Mycoplasma conjunctivae HRC/581	Mycoplasma crocodyli MP145	Mycoplasma fermentans JER	Mycoplasma fermentans PG18	Mycoplasma hyopneumoniae 168	Mycoplasma hyopneumoniae 232	Mycoplasma hyopneumoniae 7448	Mycoplasma hyopneumoniae J	Mycoplasma hyorhinis HUB-1	Mycoplasma leachii PG50	Mycoplasma mobile 163K	Mycoplasma mycoides subsp. capri str. GM12 (deltatypeIIIres clone)	Mycoplasma mycoides subsp. capri str. GM12 (tetM-lacZ clone)	Mycoplasma mycoides subsp. mycoides SC str. Gladysdale	Mycoplasma mycoides subsp. mycoides SC str. PG1	Mycoplasma penetrans HF-2	Mycoplasma pulmonis UAB CTIP	Mycoplasma synoviae 53	Oenococcus oeni PSU-1	Onion yellows phytoplasma OY-M	Orientia tsutsugamushi str. Ikeda	Thermanaerovibrio acidaminovorans DSM 6589	Buchnera aphidicola str. LL01 (Acyrthosiphon pisum)	Orientia tsutsugamushi str. Boryong
OG_00803265	excinuclease ABC subunit C	1239	49	9	1248	0.968944	COG0322	L		Baumannia cicadellinicola str. Hc (Homalodisca coagulata)	Blattabacterium sp. (Blattella germanica) str. Bge	Blattabacterium sp. (Periplaneta americana) str. BPLAN	Buchnera aphidicola str. 5A (Acyrthosiphon pisum)	Buchnera aphidicola str. APS (Acyrthosiphon pisum)	Buchnera aphidicola str. Bp (Baizongia pistaciae)	Buchnera aphidicola str. Cc (Cinara cedri)	Buchnera aphidicola str. JF98 (Acyrthosiphon pisum)	Buchnera aphidicola str. JF99 (Acyrthosiphon pisum)	Buchnera aphidicola str. LL01 (Acyrthosiphon pisum)	Buchnera aphidicola str. Sg (Schizaphis graminum)	Buchnera aphidicola str. TLW03 (Acyrthosiphon pisum)	Buchnera aphidicola str. Tuc7 (Acyrthosiphon pisum)	Candidatus Blochmannia floridanus	Candidatus Blochmannia pennsylvanicus str. BPEN	Candidatus Carsonella ruddii PV	Candidatus Hodgkinia cicadicola Dsem	Candidatus Phytoplasma mali	Candidatus Riesia pediculicola USDA	Candidatus Sulcia muelleri CARI	Candidatus Sulcia muelleri DMIN	Candidatus Sulcia muelleri GWSS	Candidatus Sulcia muelleri SMDSEM	Candidatus Vesicomyosocius okutanii HA	Candidatus Zinderia insecticola CARI	Ehrlichia canis str. Jake	Ehrlichia chaffeensis str. Arkansas	Ehrlichia ruminantium str. Gardel	Ehrlichia ruminantium str. Welgevonden	Ehrlichia ruminantium str. Welgevonden	Mycoplasma pneumoniae FH	Neorickettsia risticii str. Illinois	Neorickettsia sennetsu str. Miyayama	Orientia tsutsugamushi str. Boryong	Orientia tsutsugamushi str. Ikeda	Wigglesworthia glossinidia endosymbiont of Glossina brevipalpis	Arcanobacterium haemolyticum DSM 20595	Eubacterium siraeum V10Sc8a	Megamonas hypermegale	butyrate-producing bacterium SM4/1
OG_00486136	ribulose-phosphate 3-epimerase	1232	56	16	1248	0.968944	COG0036	G		Aster yellows witches'-broom phytoplasma AYWB	Borrelia afzelii PKo	Borrelia burgdorferi B31	Borrelia burgdorferi JD1	Borrelia burgdorferi N40	Borrelia burgdorferi ZS7	Borrelia duttonii Ly	Borrelia garinii PBi	Borrelia hermsii DAH	Borrelia recurrentis A1	Borrelia turicatae 91E135	Candidatus Amoebophilus asiaticus 5a2	Candidatus Carsonella ruddii PV	Candidatus Hodgkinia cicadicola Dsem	Candidatus Phytoplasma australiense	Candidatus Phytoplasma mali	Candidatus Sulcia muelleri CARI	Candidatus Sulcia muelleri DMIN	Candidatus Sulcia muelleri GWSS	Candidatus Sulcia muelleri SMDSEM	Candidatus Zinderia insecticola CARI	Onion yellows phytoplasma OY-M	Orientia tsutsugamushi str. Boryong	Orientia tsutsugamushi str. Ikeda	Rickettsia africae ESF-5	Rickettsia akari str. Hartford	Rickettsia bellii OSU 85-389	Rickettsia bellii RML369-C	Rickettsia canadensis str. McKiel	Rickettsia conorii str. Malish 7	Rickettsia felis URRWXCal2	Rickettsia massiliae MTU5	Rickettsia peacockii str. Rustic	Rickettsia prowazekii Rp22	Rickettsia prowazekii str. Madrid E	Rickettsia rickettsii str. 'Sheila Smith'	Rickettsia rickettsii str. Iowa	Rickettsia typhi str. Wilmington	Synergistetes bacterium SGP1	butyrate-producing bacterium SM4/1
OG_00844379	ATP-dependent Clp protease proteolytic subunit	1197	91	49	1246	0.967391	COG0740	NO		Acholeplasma laidlawii PG-8A	Aster yellows witches'-broom phytoplasma AYWB	Candidatus Hodgkinia cicadicola Dsem	Candidatus Phytoplasma australiense	Candidatus Phytoplasma mali	Candidatus Sulcia muelleri SMDSEM	Candidatus Zinderia insecticola CARI	Eubacterium cylindroides T2-87	Mesoplasma florum L1	Mycoplasma agalactiae PG2	Mycoplasma arthritidis 158L3-1	Mycoplasma bovis PG45	Mycoplasma capricolum subsp. capricolum ATCC 27343	Mycoplasma conjunctivae HRC/581	Mycoplasma crocodyli MP145	Mycoplasma fermentans JER	Mycoplasma fermentans PG18	Mycoplasma gallisepticum str. F	Mycoplasma gallisepticum str. R(high)	Mycoplasma gallisepticum str. R(low)	Mycoplasma genitalium G37	Mycoplasma hominis	Mycoplasma hyopneumoniae 168	Mycoplasma hyopneumoniae 232	Mycoplasma hyopneumoniae 7448	Mycoplasma hyopneumoniae J	Mycoplasma hyorhinis HUB-1	Mycoplasma leachii PG50	Mycoplasma mobile 163K	Mycoplasma mycoides subsp. capri str. GM12 (deltatypeIIIres clone)	Mycoplasma mycoides subsp. capri str. GM12 (tetM-lacZ clone)	Mycoplasma mycoides subsp. mycoides SC str. Gladysdale	Mycoplasma mycoides subsp. mycoides SC str. PG1	Mycoplasma penetrans HF-2	Mycoplasma pneumoniae FH	Mycoplasma pneumoniae M129	Mycoplasma pulmonis UAB CTIP	Mycoplasma synoviae 53	Onion yellows phytoplasma OY-M	Ureaplasma parvum serovar 3 str. ATCC 27815
OG_00802962	tRNA pseudouridine synthase B	1232	56	12	1244	0.965839	COG0130	J		Acetohalobium arabaticum DSM 5501	Candidatus Carsonella ruddii PV	Candidatus Hodgkinia cicadicola Dsem	Candidatus Liberibacter asiaticus str. psy62	Candidatus Liberibacter solanacearum CLso-ZC1	Candidatus Pelagibacter ubique HTCC1062	Candidatus Riesia pediculicola USDA	Candidatus Sulcia muelleri CARI	Candidatus Sulcia muelleri DMIN	Candidatus Sulcia muelleri GWSS	Candidatus Sulcia muelleri SMDSEM	Candidatus Zinderia insecticola CARI	Gordonibacter pamelaeae 7-10-1-b	Helicobacter acinonychis str. Sheeba	Helicobacter felis ATCC 49179	Helicobacter pylori	Helicobacter pylori 26695	Helicobacter pylori 35A	Helicobacter pylori 51	Helicobacter pylori 908	Helicobacter pylori B38	Helicobacter pylori B8	Helicobacter pylori Cuz20	Helicobacter pylori G27	Helicobacter pylori HPAG1	Helicobacter pylori J99	Helicobacter pylori P12	Helicobacter pylori PeCan4	Helicobacter pylori SJM180	Helicobacter pylori Sat464	Helicobacter pylori Shi470	Helicobacter pylori v225d	Mycoplasma genitalium G37	Mycoplasma pneumoniae FH	Mycoplasma pneumoniae M129	Salinibacter ruber DSM 13855	Anaeromyxobacter dehalogenans 2CP-1	Anaeromyxobacter dehalogenans 2CP-C	Anaeromyxobacter sp. Fw109-5	Anaeromyxobacter sp. K
OG_00487208	tRNA delta<2>-isopentenylpyrophosphate transferase	1236	52	7	1243	0.965062	COG0324	J		Candidatus Carsonella ruddii PV	Candidatus Hodgkinia cicadicola Dsem	Candidatus Sulcia muelleri CARI	Candidatus Sulcia muelleri DMIN	Candidatus Sulcia muelleri GWSS	Candidatus Sulcia muelleri SMDSEM	Candidatus Zinderia insecticola CARI	Mesoplasma florum L1	Mycoplasma agalactiae PG2	Mycoplasma arthritidis 158L3-1	Mycoplasma bovis PG45	Mycoplasma capricolum subsp. capricolum ATCC 27343	Mycoplasma conjunctivae HRC/581	Mycoplasma crocodyli MP145	Mycoplasma fermentans JER	Mycoplasma fermentans PG18	Mycoplasma genitalium G37	Mycoplasma hominis	Mycoplasma hyopneumoniae 168	Mycoplasma hyopneumoniae 232	Mycoplasma hyopneumoniae 7448	Mycoplasma hyopneumoniae J	Mycoplasma hyorhinis HUB-1	Mycoplasma leachii PG50	Mycoplasma mobile 163K	Mycoplasma mycoides subsp. capri str. GM12 (deltatypeIIIres clone)	Mycoplasma mycoides subsp. capri str. GM12 (tetM-lacZ clone)	Mycoplasma mycoides subsp. mycoides SC str. Gladysdale	Mycoplasma mycoides subsp. mycoides SC str. PG1	Mycoplasma pneumoniae FH	Mycoplasma pneumoniae M129	Mycoplasma pulmonis UAB CTIP	Mycoplasma synoviae 53	Ureaplasma parvum serovar 3 str. ATCC 27815	Ureaplasma parvum serovar 3 str. ATCC 700970	Ureaplasma urealyticum serovar 10 str. ATCC 33699	cyanobacterium UCYN-A	Buchnera aphidicola str. Sg (Schizaphis graminum)	Candidatus Liberibacter asiaticus str. psy62	Eubacterium cylindroides T2-87
OG_00582020	UDP-N-acetylenolpyruvoylglucosamine reductase	1239	49	3	1242	0.964286	COG0812	M		Buchnera aphidicola str. Cc (Cinara cedri)	Candidatus Carsonella ruddii PV	Candidatus Hodgkinia cicadicola Dsem	Candidatus Sulcia muelleri CARI	Candidatus Sulcia muelleri DMIN	Candidatus Sulcia muelleri GWSS	Candidatus Sulcia muelleri SMDSEM	Candidatus Zinderia insecticola CARI	Ehrlichia canis str. Jake	Ehrlichia chaffeensis str. Arkansas	Ehrlichia ruminantium str. Gardel	Ehrlichia ruminantium str. Welgevonden	Ehrlichia ruminantium str. Welgevonden	Mycoplasma agalactiae PG2	Mycoplasma arthritidis 158L3-1	Mycoplasma bovis PG45	Mycoplasma crocodyli MP145	Mycoplasma fermentans JER	Mycoplasma fermentans PG18	Mycoplasma hominis	Mycoplasma hyorhinis HUB-1	Mycoplasma leachii PG50	Mycoplasma mobile 163K	Mycoplasma mycoides subsp. capri str. GM12 (deltatypeIIIres clone)	Mycoplasma mycoides subsp. capri str. GM12 (tetM-lacZ clone)	Mycoplasma mycoides subsp. mycoides SC str. Gladysdale	Mycoplasma mycoides subsp. mycoides SC str. PG1	Ureaplasma parvum serovar 3 str. ATCC 27815	Ureaplasma parvum serovar 3 str. ATCC 700970	Ureaplasma urealyticum serovar 10 str. ATCC 33699	Mesoplasma florum L1	Mycoplasma capricolum subsp. capricolum ATCC 27343	Mycoplasma conjunctivae HRC/581	Mycoplasma gallisepticum str. F	Mycoplasma gallisepticum str. R(high)	Mycoplasma gallisepticum str. R(low)	Mycoplasma genitalium G37	Mycoplasma hyopneumoniae 168	Mycoplasma hyopneumoniae 232	Mycoplasma hyopneumoniae 7448
OG_00687521	holliday junction DNA helicase RuvA	1226	62	14	1240	0.962733	COG0632	L		Ammonifex degensii KC4	Aquifex aeolicus VF5	Aster yellows witches'-broom phytoplasma AYWB	Buchnera aphidicola str. 5A (Acyrthosiphon pisum)	Buchnera aphidicola str. APS (Acyrthosiphon pisum)	Buchnera aphidicola str. Bp (Baizongia pistaciae)	Buchnera aphidicola str. Cc (Cinara cedri)	Buchnera aphidicola str. JF98 (Acyrthosiphon pisum)	Buchnera aphidicola str. JF99 (Acyrthosiphon pisum)	Buchnera aphidicola str. LL01 (Acyrthosiphon pisum)	Buchnera aphidicola str. Sg (Schizaphis graminum)	Buchnera aphidicola str. TLW03 (Acyrthosiphon pisum)	Buchnera aphidicola str. Tuc7 (Acyrthosiphon pisum)	Caldicellulosiruptor bescii DSM 6725	Caldicellulosiruptor hydrothermalis 108	Caldicellulosiruptor kristjanssonii 177R1B	Caldicellulosiruptor kronotskyensis 2002	Caldicellulosiruptor obsidiansis OB47	Caldicellulosiruptor owensensis OL	Caldicellulosiruptor saccharolyticus DSM 8903	Candidatus Blochmannia floridanus	Candidatus Blochmannia pennsylvanicus str. BPEN	Candidatus Carsonella ruddii PV	Candidatus Hodgkinia cicadicola Dsem	Candidatus Pelagibacter ubique HTCC1062	Candidatus Phytoplasma australiense	Candidatus Riesia pediculicola USDA	Candidatus Ruthia magnifica str. Cm (Calyptogena magnifica)	Candidatus Sulcia muelleri CARI	Candidatus Sulcia muelleri DMIN	Candidatus Sulcia muelleri GWSS	Candidatus Sulcia muelleri SMDSEM	Candidatus Zinderia insecticola CARI	Coprothermobacter proteolyticus DSM 5265	Desulfotalea psychrophila LSv54	Fibrobacter succinogenes subsp. succinogenes S85	Hydrogenobacter thermophilus TK-6	Hydrogenobacter thermophilus TK-6	Hydrogenobaculum sp. Y04AAS1	Moorella thermoacetica ATCC 39073
OG_00582023	3-phosphoshikimate 1-carboxyvinyltransferase	1236	52	2	1238	0.96118	COG0128	E		Candidatus Hodgkinia cicadicola Dsem	Elusimicrobium minutum Pei191	Lactobacillus reuteri DSM 20016	Lactobacillus reuteri JCM 1112	Lawsonia intracellularis PHE/MN1-00	Mesoplasma florum L1	Mycoplasma agalactiae PG2	Mycoplasma arthritidis 158L3-1	Mycoplasma bovis PG45	Mycoplasma capricolum subsp. capricolum ATCC 27343	Mycoplasma crocodyli MP145	Mycoplasma fermentans JER	Mycoplasma fermentans PG18	Mycoplasma genitalium G37	Mycoplasma hominis	Mycoplasma leachii PG50	Mycoplasma mobile 163K	Mycoplasma mycoides subsp. capri str. GM12 (deltatypeIIIres clone)	Mycoplasma mycoides subsp. capri str. GM12 (tetM-lacZ clone)	Mycoplasma mycoides subsp. mycoides SC str. Gladysdale	Mycoplasma mycoides subsp. mycoides SC str. PG1	Mycoplasma penetrans HF-2	Mycoplasma pneumoniae FH	Mycoplasma pneumoniae M129	Mycoplasma synoviae 53	Orientia tsutsugamushi str. Boryong	Orientia tsutsugamushi str. Ikeda	Rickettsia africae ESF-5	Rickettsia akari str. Hartford	Rickettsia bellii OSU 85-389	Rickettsia bellii RML369-C	Rickettsia canadensis str. McKiel	Rickettsia conorii str. Malish 7	Rickettsia felis URRWXCal2	Rickettsia massiliae MTU5	Rickettsia peacockii str. Rustic	Rickettsia prowazekii Rp22	Rickettsia prowazekii str. Madrid E	Rickettsia rickettsii str. 'Sheila Smith'	Rickettsia rickettsii str. Iowa
OG_00802510	30S ribosomal protein S1	1232	56	6	1238	0.96118	COG0539	J		Aster yellows witches'-broom phytoplasma AYWB	Candidatus Carsonella ruddii PV	Candidatus Hodgkinia cicadicola Dsem	Candidatus Phytoplasma australiense	Candidatus Phytoplasma mali	Dehalococcoides ethenogenes 195	Dehalococcoides sp. BAV1	Dehalococcoides sp. CBDB1	Dehalococcoides sp. GT	Dehalococcoides sp. VS	Dehalogenimonas lykanthroporepellens BL-DC-9	Eubacterium cylindroides T2-87	Mesoplasma florum L1	Mycoplasma agalactiae PG2	Mycoplasma arthritidis 158L3-1	Mycoplasma bovis PG45	Mycoplasma capricolum subsp. capricolum ATCC 27343	Mycoplasma conjunctivae HRC/581	Mycoplasma crocodyli MP145	Mycoplasma fermentans JER	Mycoplasma fermentans PG18	Mycoplasma gallisepticum str. F	Mycoplasma gallisepticum str. R(high)	Mycoplasma gallisepticum str. R(low)	Mycoplasma genitalium G37	Mycoplasma hominis	Mycoplasma hyopneumoniae 168	Mycoplasma hyopneumoniae 232	Mycoplasma hyopneumoniae 7448	Mycoplasma hyopneumoniae J	Mycoplasma hyorhinis HUB-1	Mycoplasma leachii PG50	Mycoplasma mobile 163K	Mycoplasma mycoides subsp. capri str. GM12 (deltatypeIIIres clone)	Mycoplasma mycoides subsp. capri str. GM12 (tetM-lacZ clone)	Mycoplasma mycoides subsp. mycoides SC str. Gladysdale	Mycoplasma mycoides subsp. mycoides SC str. PG1	Mycoplasma penetrans HF-2	Mycoplasma pneumoniae FH	Mycoplasma pneumoniae M129
OG_00309120	ribonuclease HII	1235	53	2	1237	0.960404	COG0164	L		Aster yellows witches'-broom phytoplasma AYWB	Blattabacterium sp. (Blattella germanica) str. Bge	Blattabacterium sp. (Periplaneta americana) str. BPLAN	Buchnera aphidicola str. 5A (Acyrthosiphon pisum)	Buchnera aphidicola str. APS (Acyrthosiphon pisum)	Buchnera aphidicola str. Bp (Baizongia pistaciae)	Buchnera aphidicola str. Cc (Cinara cedri)	Buchnera aphidicola str. JF98 (Acyrthosiphon pisum)	Buchnera aphidicola str. JF99 (Acyrthosiphon pisum)	Buchnera aphidicola str. LL01 (Acyrthosiphon pisum)	Buchnera aphidicola str. Sg (Schizaphis graminum)	Buchnera aphidicola str. TLW03 (Acyrthosiphon pisum)	Buchnera aphidicola str. Tuc7 (Acyrthosiphon pisum)	Candidatus Carsonella ruddii PV	Candidatus Hodgkinia cicadicola Dsem	Candidatus Phytoplasma australiense	Candidatus Phytoplasma mali	Candidatus Ruthia magnifica str. Cm (Calyptogena magnifica)	Candidatus Sulcia muelleri CARI	Candidatus Sulcia muelleri DMIN	Candidatus Sulcia muelleri GWSS	Candidatus Sulcia muelleri SMDSEM	Candidatus Vesicomyosocius okutanii HA	Candidatus Zinderia insecticola CARI	Mycoplasma arthritidis 158L3-1	Mycoplasma conjunctivae HRC/581	Mycoplasma gallisepticum str. F	Mycoplasma gallisepticum str. R(high)	Mycoplasma gallisepticum str. R(low)	Mycoplasma genitalium G37	Mycoplasma hominis	Mycoplasma hyopneumoniae 168	Mycoplasma hyopneumoniae 232	Mycoplasma hyopneumoniae 7448	Mycoplasma hyopneumoniae J	Mycoplasma hyorhinis HUB-1	Mycoplasma pneumoniae FH	Mycoplasma pneumoniae M129	Mycoplasma pulmonis UAB CTIP	Mycoplasma synoviae 53
OG_00486321	RNA methyltransferase, TrmH family, group 3	1222	66	15	1237	0.960404	COG0566	J		Buchnera aphidicola str. 5A (Acyrthosiphon pisum)	Buchnera aphidicola str. APS (Acyrthosiphon pisum)	Buchnera aphidicola str. Bp (Baizongia pistaciae)	Buchnera aphidicola str. Cc (Cinara cedri)	Buchnera aphidicola str. JF98 (Acyrthosiphon pisum)	Buchnera aphidicola str. JF99 (Acyrthosiphon pisum)	Buchnera aphidicola str. LL01 (Acyrthosiphon pisum)	Buchnera aphidicola str. Sg (Schizaphis graminum)	Buchnera aphidicola str. TLW03 (Acyrthosiphon pisum)	Buchnera aphidicola str. Tuc7 (Acyrthosiphon pisum)	Candidatus Carsonella ruddii PV	Candidatus Hodgkinia cicadicola Dsem	Candidatus Protochlamydia amoebophila UWE25	Chlamydia muridarum Nigg	Chlamydia trachomatis 434/Bu	Chlamydia trachomatis A/HAR-13	Chlamydia trachomatis B/Jali20/OT	Chlamydia trachomatis B/TZ1A828/OT	Chlamydia trachomatis D-EC	Chlamydia trachomatis D-LC	Chlamydia trachomatis D/UW-3/CX	Chlamydia trachomatis E/11023	Chlamydia trachomatis E/150	Chlamydia trachomatis G/11074	Chlamydia trachomatis G/11222	Chlamydia trachomatis G/9301	Chlamydia trachomatis G/9768	Chlamydia trachomatis L2b/UCH-1/proctitis	Chlamydia trachomatis Sweden2	Chlamydophila abortus S26/3	Chlamydophila caviae GPIC	Chlamydophila felis Fe/C-56	Chlamydophila pneumoniae AR39	Chlamydophila pneumoniae CWL029	Chlamydophila pneumoniae J138	Chlamydophila pneumoniae LPCoLN	Chlamydophila pneumoniae TW-183	Dehalococcoides ethenogenes 195	Dehalococcoides sp. BAV1	Dehalococcoides sp. CBDB1
OG_00279053	DNA topoisomerase I	1187	101	49	1236	0.959627	COG0550	L		Buchnera aphidicola str. Bp (Baizongia pistaciae)	Buchnera aphidicola str. Cc (Cinara cedri)	Candidatus Blochmannia floridanus	Candidatus Blochmannia pennsylvanicus str. BPEN	Candidatus Carsonella ruddii PV	Candidatus Hodgkinia cicadicola Dsem	Candidatus Riesia pediculicola USDA	Candidatus Sulcia muelleri CARI	Candidatus Sulcia muelleri DMIN	Candidatus Sulcia muelleri GWSS	Candidatus Sulcia muelleri SMDSEM	Candidatus Zinderia insecticola CARI	Coprothermobacter proteolyticus DSM 5265	Mycoplasma conjunctivae HRC/581	Wigglesworthia glossinidia endosymbiont of Glossina brevipalpis	Achromobacter xylosoxidans A8	Akkermansia muciniphila ATCC BAA-835	Aminobacterium colombiense DSM 12261	Bordetella bronchiseptica RB50	Burkholderia ambifaria AMMD	Burkholderia ambifaria MC40-6	Burkholderia cenocepacia J2315	Burkholderia cenocepacia MC0-3	Burkholderia mallei ATCC 23344	Burkholderia mallei NCTC 10229	Burkholderia mallei NCTC 10247	Burkholderia mallei SAVP1	Burkholderia phytofirmans PsJN	Burkholderia pseudomallei 1106a	Burkholderia pseudomallei 1710b	Burkholderia pseudomallei 668	Burkholderia pseudomallei K96243	Burkholderia sp. 383	Burkholderia thailandensis E264	Burkholderia xenovorans LB400	Comamonas testosteroni CNB-1	Conexibacter woesei DSM 14684	Coraliomargarita akajimensis DSM 45221	Fibrobacter succinogenes subsp. succinogenes S85	Fibrobacter succinogenes subsp. succinogenes S85
OG_00486366	ATP-dependent protease ATP-binding subunit ClpX	1226	62	8	1234	0.958075	COG1219	O		Acholeplasma laidlawii PG-8A	Aster yellows witches'-broom phytoplasma AYWB	Candidatus Hodgkinia cicadicola Dsem	Candidatus Phytoplasma australiense	Candidatus Phytoplasma mali	Candidatus Zinderia insecticola CARI	Dehalococcoides ethenogenes 195	Dehalococcoides sp. BAV1	Dehalococcoides sp. CBDB1	Dehalococcoides sp. GT	Dehalococcoides sp. VS	Dehalogenimonas lykanthroporepellens BL-DC-9	Elusimicrobium minutum Pei191	Eubacterium cylindroides T2-87	Gardnerella vaginalis 409-05	Gardnerella vaginalis ATCC 14019	Mesoplasma florum L1	Mycoplasma agalactiae PG2	Mycoplasma arthritidis 158L3-1	Mycoplasma bovis PG45	Mycoplasma capricolum subsp. capricolum ATCC 27343	Mycoplasma conjunctivae HRC/581	Mycoplasma crocodyli MP145	Mycoplasma fermentans JER	Mycoplasma fermentans PG18	Mycoplasma gallisepticum str. F	Mycoplasma gallisepticum str. R(high)	Mycoplasma gallisepticum str. R(low)	Mycoplasma genitalium G37	Mycoplasma hominis	Mycoplasma hyopneumoniae 168	Mycoplasma hyopneumoniae 232	Mycoplasma hyopneumoniae 7448	Mycoplasma hyopneumoniae J	Mycoplasma hyorhinis HUB-1	Mycoplasma leachii PG50	Mycoplasma mobile 163K	Mycoplasma mycoides subsp. capri str. GM12 (deltatypeIIIres clone)	Mycoplasma mycoides subsp. capri str. GM12 (tetM-lacZ clone)	Mycoplasma mycoides subsp. mycoides SC str. Gladysdale
OG_00804133	recombination protein RecR	1229	59	3	1232	0.956522	COG0353	L		Aster yellows witches'-broom phytoplasma AYWB	Baumannia cicadellinicola str. Hc (Homalodisca coagulata)	Blattabacterium sp. (Blattella germanica) str. Bge	Blattabacterium sp. (Periplaneta americana) str. BPLAN	Borrelia afzelii PKo	Borrelia burgdorferi B31	Borrelia burgdorferi JD1	Borrelia burgdorferi N40	Borrelia burgdorferi ZS7	Borrelia garinii PBi	Buchnera aphidicola str. 5A (Acyrthosiphon pisum)	Buchnera aphidicola str. APS (Acyrthosiphon pisum)	Buchnera aphidicola str. Bp (Baizongia pistaciae)	Buchnera aphidicola str. Cc (Cinara cedri)	Buchnera aphidicola str. JF98 (Acyrthosiphon pisum)	Buchnera aphidicola str. JF99 (Acyrthosiphon pisum)	Buchnera aphidicola str. LL01 (Acyrthosiphon pisum)	Buchnera aphidicola str. Sg (Schizaphis graminum)	Buchnera aphidicola str. TLW03 (Acyrthosiphon pisum)	Buchnera aphidicola str. Tuc7 (Acyrthosiphon pisum)	Candidatus Blochmannia floridanus	Candidatus Blochmannia pennsylvanicus str. BPEN	Candidatus Carsonella ruddii PV	Candidatus Hodgkinia cicadicola Dsem	Candidatus Phytoplasma australiense	Candidatus Riesia pediculicola USDA	Candidatus Ruthia magnifica str. Cm (Calyptogena magnifica)	Candidatus Sulcia muelleri CARI	Candidatus Sulcia muelleri DMIN	Candidatus Sulcia muelleri GWSS	Candidatus Sulcia muelleri SMDSEM	Candidatus Vesicomyosocius okutanii HA	Candidatus Zinderia insecticola CARI	Desulfotalea psychrophila LSv54	Eubacterium cylindroides T2-87	Fervidobacterium nodosum Rt17-B1	Helicobacter felis ATCC 49179	Kosmotoga olearia TBF 19.5.1	Lactobacillus fermentum CECT 5716	Mycoplasma genitalium G37
OG_00499434	undecaprenyl diphosphate synthase	1227	61	5	1232	0.956522	COG0020	I		Anaplasma phagocytophilum HZ	Aster yellows witches'-broom phytoplasma AYWB	Bartonella bacilliformis KC583	Bartonella grahamii as4aup	Bartonella henselae str. Houston-1	Bartonella quintana str. Toulouse	Bartonella tribocorum CIP 105476	Buchnera aphidicola str. Cc (Cinara cedri)	Candidatus Carsonella ruddii PV	Candidatus Hodgkinia cicadicola Dsem	Candidatus Phytoplasma australiense	Candidatus Phytoplasma mali	Candidatus Sulcia muelleri CARI	Candidatus Sulcia muelleri DMIN	Candidatus Sulcia muelleri GWSS	Candidatus Sulcia muelleri SMDSEM	Candidatus Zinderia insecticola CARI	Ehrlichia canis str. Jake	Ehrlichia chaffeensis str. Arkansas	Ehrlichia ruminantium str. Gardel	Ehrlichia ruminantium str. Welgevonden	Ehrlichia ruminantium str. Welgevonden	Mesoplasma florum L1	Mycoplasma agalactiae PG2	Mycoplasma arthritidis 158L3-1	Mycoplasma bovis PG45	Mycoplasma capricolum subsp. capricolum ATCC 27343	Mycoplasma conjunctivae HRC/581	Mycoplasma crocodyli MP145	Mycoplasma fermentans JER	Mycoplasma fermentans PG18	Mycoplasma gallisepticum str. F	Mycoplasma gallisepticum str. R(high)	Mycoplasma gallisepticum str. R(low)	Mycoplasma genitalium G37	Mycoplasma hominis	Mycoplasma hyopneumoniae 168	Mycoplasma hyopneumoniae 232	Mycoplasma hyopneumoniae 7448	Mycoplasma hyopneumoniae J
OG_00828057	primosome assembly protein PriA	1223	65	9	1232	0.956522	COG1198	L		Acidimicrobium ferrooxidans DSM 10331	Blattabacterium sp. (Blattella germanica) str. Bge	Blattabacterium sp. (Periplaneta americana) str. BPLAN	Buchnera aphidicola str. Bp (Baizongia pistaciae)	Buchnera aphidicola str. Cc (Cinara cedri)	Candidatus Blochmannia floridanus	Candidatus Blochmannia pennsylvanicus str. BPEN	Candidatus Carsonella ruddii PV	Candidatus Hodgkinia cicadicola Dsem	Candidatus Sulcia muelleri CARI	Candidatus Sulcia muelleri DMIN	Candidatus Sulcia muelleri GWSS	Candidatus Sulcia muelleri SMDSEM	Candidatus Zinderia insecticola CARI	Coprothermobacter proteolyticus DSM 5265	Mesoplasma florum L1	Mycoplasma agalactiae PG2	Mycoplasma arthritidis 158L3-1	Mycoplasma bovis PG45	Mycoplasma capricolum subsp. capricolum ATCC 27343	Mycoplasma conjunctivae HRC/581	Mycoplasma crocodyli MP145	Mycoplasma fermentans JER	Mycoplasma fermentans PG18	Mycoplasma gallisepticum str. F	Mycoplasma gallisepticum str. R(high)	Mycoplasma gallisepticum str. R(low)	Mycoplasma genitalium G37	Mycoplasma hominis	Mycoplasma hyopneumoniae 168	Mycoplasma hyopneumoniae 232	Mycoplasma hyopneumoniae 7448	Mycoplasma hyopneumoniae J	Mycoplasma hyorhinis HUB-1	Mycoplasma leachii PG50	Mycoplasma mobile 163K	Mycoplasma mycoides subsp. capri str. GM12 (deltatypeIIIres clone)	Mycoplasma mycoides subsp. capri str. GM12 (tetM-lacZ clone)	Mycoplasma mycoides subsp. mycoides SC str. Gladysdale	Mycoplasma mycoides subsp. mycoides SC str. PG1
OG_00871557	50S ribosomal protein L35	1197	91	35	1232	0.956522	COG0291	J		Acinetobacter baumannii ATCC 17978	Bacteriovorax marinus SJ	Bdellovibrio bacteriovorus HD100	Bifidobacterium adolescentis ATCC 15703	Bifidobacterium animalis subsp. lactis AD011	Bifidobacterium animalis subsp. lactis BB-12	Bifidobacterium animalis subsp. lactis Bl-04	Bifidobacterium animalis subsp. lactis DSM 10140	Bifidobacterium animalis subsp. lactis V9	Bifidobacterium bifidum PRL2010	Bifidobacterium bifidum S17	Bifidobacterium dentium Bd1	Bifidobacterium longum DJO10A	Bifidobacterium longum NCC2705	Bifidobacterium longum subsp. infantis ATCC 15697	Bifidobacterium longum subsp. longum BBMN68	Bifidobacterium longum subsp. longum F8	Bifidobacterium longum subsp. longum JDM301	Borrelia afzelii PKo	Borrelia burgdorferi B31	Borrelia burgdorferi JD1	Borrelia burgdorferi N40	Borrelia burgdorferi ZS7	Borrelia duttonii Ly	Borrelia garinii PBi	Borrelia hermsii DAH	Borrelia recurrentis A1	Borrelia turicatae 91E135	Brachyspira hyodysenteriae WA1	Brachyspira murdochii DSM 12563	Brachyspira pilosicoli 95/1000	Candidatus Carsonella ruddii PV	Candidatus Hodgkinia cicadicola Dsem	Candidatus Zinderia insecticola CARI	Chlamydia trachomatis D-EC	Chlamydia trachomatis D-LC	Coprothermobacter proteolyticus DSM 5265	Deinococcus deserti VCD115	Deinococcus geothermalis DSM 11300	Deinococcus radiodurans R1
OG_00486197	50S ribosomal protein L23	1224	64	7	1231	0.955745	COG0089	J		Anaplasma centrale str. Israel	Anaplasma marginale str. Florida	Anaplasma marginale str. St. Maries	Anaplasma phagocytophilum HZ	Campylobacter jejuni subsp. jejuni ICDCCJ07001	Candidatus Carsonella ruddii PV	Candidatus Hodgkinia cicadicola Dsem	Candidatus Sulcia muelleri CARI	Candidatus Sulcia muelleri DMIN	Candidatus Sulcia muelleri GWSS	Candidatus Sulcia muelleri SMDSEM	Candidatus Zinderia insecticola CARI	Coprothermobacter proteolyticus DSM 5265	Ehrlichia canis str. Jake	Ehrlichia chaffeensis str. Arkansas	Ehrlichia ruminantium str. Gardel	Ehrlichia ruminantium str. Welgevonden	Ehrlichia ruminantium str. Welgevonden	Mycoplasma agalactiae PG2	Mycoplasma arthritidis 158L3-1	Mycoplasma bovis PG45	Mycoplasma capricolum subsp. capricolum ATCC 27343	Mycoplasma conjunctivae HRC/581	Mycoplasma crocodyli MP145	Mycoplasma fermentans JER	Mycoplasma fermentans PG18	Mycoplasma gallisepticum str. F	Mycoplasma gallisepticum str. R(high)	Mycoplasma gallisepticum str. R(low)	Mycoplasma genitalium G37	Mycoplasma hominis	Mycoplasma hyopneumoniae 168	Mycoplasma hyopneumoniae 232	Mycoplasma hyopneumoniae 7448	Mycoplasma hyopneumoniae J	Mycoplasma hyorhinis HUB-1	Mycoplasma leachii PG50	Mycoplasma mobile 163K	Mycoplasma mycoides subsp. capri str. GM12 (deltatypeIIIres clone)	Mycoplasma mycoides subsp. capri str. GM12 (tetM-lacZ clone)
OG_00487020	dephospho-CoA kinase	1206	82	23	1229	0.954193	COG0237	H		Aster yellows witches'-broom phytoplasma AYWB	Buchnera aphidicola str. Bp (Baizongia pistaciae)	Buchnera aphidicola str. Cc (Cinara cedri)	Candidatus Amoebophilus asiaticus 5a2	Candidatus Blochmannia floridanus	Candidatus Carsonella ruddii PV	Candidatus Hodgkinia cicadicola Dsem	Candidatus Phytoplasma australiense	Candidatus Phytoplasma mali	Candidatus Sulcia muelleri CARI	Candidatus Sulcia muelleri DMIN	Candidatus Sulcia muelleri GWSS	Candidatus Sulcia muelleri SMDSEM	Candidatus Zinderia insecticola CARI	Coprothermobacter proteolyticus DSM 5265	Desulfohalobium retbaense DSM 5692	Desulfomicrobium baculatum DSM 4028	Desulfovibrio desulfuricans subsp. desulfuricans str. ATCC 27774	Desulfovibrio desulfuricans subsp. desulfuricans str. G20	Desulfovibrio magneticus RS-1	Desulfovibrio salexigens DSM 2638	Desulfovibrio vulgaris DP4	Desulfovibrio vulgaris RCH1	Desulfovibrio vulgaris str. 'Miyazaki F'	Desulfovibrio vulgaris str. Hildenborough	Lawsonia intracellularis PHE/MN1-00	Mycoplasma agalactiae PG2	Mycoplasma arthritidis 158L3-1	Mycoplasma bovis PG45	Mycoplasma conjunctivae HRC/581	Mycoplasma crocodyli MP145	Mycoplasma fermentans JER	Mycoplasma fermentans PG18	Mycoplasma gallisepticum str. F	Mycoplasma gallisepticum str. R(high)	Mycoplasma gallisepticum str. R(low)	Mycoplasma genitalium G37	Mycoplasma hominis	Mycoplasma hyopneumoniae 168	Mycoplasma hyopneumoniae 232
OG_00120492	histone family protein DNA-binding protein	1215	73	13	1228	0.953416	COG0776	L		Atopobium parvulum DSM 20469	Brachyspira pilosicoli 95/1000	Candidatus Azobacteroides pseudotrichonymphae genomovar. CFP2	Candidatus Blochmannia floridanus	Candidatus Blochmannia pennsylvanicus str. BPEN	Candidatus Carsonella ruddii PV	Candidatus Hodgkinia cicadicola Dsem	Candidatus Riesia pediculicola USDA	Candidatus Sulcia muelleri CARI	Candidatus Sulcia muelleri DMIN	Candidatus Sulcia muelleri GWSS	Candidatus Sulcia muelleri SMDSEM	Candidatus Zinderia insecticola CARI	Corynebacterium aurimucosum ATCC 700975	Corynebacterium diphtheriae NCTC 13129	Corynebacterium pseudotuberculosis 1002	Corynebacterium pseudotuberculosis C231	Corynebacterium pseudotuberculosis FRC41	Corynebacterium pseudotuberculosis I19	Cryptobacterium curtum DSM 15641	Dehalococcoides ethenogenes 195	Dehalococcoides sp. BAV1	Dehalococcoides sp. CBDB1	Dehalococcoides sp. GT	Dehalococcoides sp. VS	Dehalogenimonas lykanthroporepellens BL-DC-9	Leptospira biflexa serovar Patoc strain 'Patoc 1 (Ames)'	Leptospira biflexa serovar Patoc strain 'Patoc 1 (Paris)'	Leptospira borgpetersenii serovar Hardjo-bovis JB197	Leptospira borgpetersenii serovar Hardjo-bovis L550	Leptospira interrogans serovar Copenhageni str. Fiocruz L1-130	Leptospira interrogans serovar Lai str. 56601	Mycoplasma genitalium G37	Mycoplasma hominis	Mycoplasma penetrans HF-2	Mycoplasma pneumoniae FH	Mycoplasma pneumoniae M129	Neorickettsia risticii str. Illinois	Neorickettsia sennetsu str. Miyayama	Olsenella uli DSM 7084
OG_00601994	holliday junction resolvase-like protein	1215	73	11	1226	0.951863	COG0816	L		Bdellovibrio bacteriovorus HD100	Borrelia afzelii PKo	Borrelia burgdorferi B31	Borrelia burgdorferi JD1	Borrelia burgdorferi N40	Borrelia burgdorferi ZS7	Borrelia duttonii Ly	Borrelia garinii PBi	Borrelia hermsii DAH	Borrelia recurrentis A1	Borrelia turicatae 91E135	Buchnera aphidicola str. Cc (Cinara cedri)	Calditerrivibrio nitroreducens DSM 19672	Candidatus Carsonella ruddii PV	Candidatus Hodgkinia cicadicola Dsem	Candidatus Riesia pediculicola USDA	Candidatus Zinderia insecticola CARI	Deferribacter desulfuricans SSM1	Denitrovibrio acetiphilus DSM 12809	Desulfatibacillum alkenivorans AK-01	Desulfobacterium autotrophicum HRM2	Desulfotalea psychrophila LSv54	Desulfurivibrio alkaliphilus AHT2	Elusimicrobium minutum Pei191	Eubacterium cylindroides T2-87	Fervidobacterium nodosum Rt17-B1	Geobacter bemidjiensis Bem	Geobacter lovleyi SZ	Geobacter sp. FRC-32	Geobacter sp. M21	Geobacter sulfurreducens KN400	Geobacter sulfurreducens PCA	Geobacter uraniireducens Rf4	Kosmotoga olearia TBF 19.5.1	Leptospira biflexa serovar Patoc strain 'Patoc 1 (Ames)'	Leptospira biflexa serovar Patoc strain 'Patoc 1 (Paris)'	Leptospira borgpetersenii serovar Hardjo-bovis JB197	Leptospira borgpetersenii serovar Hardjo-bovis L550	Leptospira interrogans serovar Copenhageni str. Fiocruz L1-130	Leptospira interrogans serovar Lai str. 56601
OG_00342722	UDP-N-acetylglucosamine 1-carboxyvinyltransferase	1192	96	34	1226	0.951863	COG0766	M		Acholeplasma laidlawii PG-8A	Anaplasma phagocytophilum HZ	Aster yellows witches'-broom phytoplasma AYWB	Buchnera aphidicola str. Cc (Cinara cedri)	Candidatus Carsonella ruddii PV	Candidatus Hodgkinia cicadicola Dsem	Candidatus Phytoplasma australiense	Candidatus Phytoplasma mali	Candidatus Sulcia muelleri CARI	Candidatus Sulcia muelleri DMIN	Candidatus Sulcia muelleri GWSS	Candidatus Sulcia muelleri SMDSEM	Candidatus Zinderia insecticola CARI	Dehalococcoides ethenogenes 195	Dehalococcoides sp. BAV1	Dehalococcoides sp. CBDB1	Dehalococcoides sp. GT	Dehalococcoides sp. VS	Dehalogenimonas lykanthroporepellens BL-DC-9	Ehrlichia canis str. Jake	Ehrlichia chaffeensis str. Arkansas	Ehrlichia ruminantium str. Gardel	Ehrlichia ruminantium str. Welgevonden	Ehrlichia ruminantium str. Welgevonden	Mesoplasma florum L1	Mycoplasma agalactiae PG2	Mycoplasma arthritidis 158L3-1	Mycoplasma bovis PG45	Mycoplasma capricolum subsp. capricolum ATCC 27343	Mycoplasma conjunctivae HRC/581	Mycoplasma crocodyli MP145	Mycoplasma fermentans JER	Mycoplasma fermentans PG18	Mycoplasma gallisepticum str. F	Mycoplasma gallisepticum str. R(high)	Mycoplasma gallisepticum str. R(low)	Mycoplasma genitalium G37	Mycoplasma hominis	Mycoplasma hyopneumoniae 168	Mycoplasma hyopneumoniae 232
OG_00483928	riboflavin biosynthesis protein RibF	1221	67	4	1225	0.951087	COG0196	H		Aster yellows witches'-broom phytoplasma AYWB	Borrelia afzelii PKo	Borrelia burgdorferi B31	Borrelia burgdorferi JD1	Borrelia burgdorferi N40	Borrelia burgdorferi ZS7	Borrelia duttonii Ly	Borrelia garinii PBi	Borrelia hermsii DAH	Borrelia recurrentis A1	Borrelia turicatae 91E135	Buchnera aphidicola str. Bp (Baizongia pistaciae)	Buchnera aphidicola str. Cc (Cinara cedri)	Candidatus Amoebophilus asiaticus 5a2	Candidatus Carsonella ruddii PV	Candidatus Hodgkinia cicadicola Dsem	Candidatus Phytoplasma mali	Candidatus Sulcia muelleri CARI	Candidatus Sulcia muelleri DMIN	Candidatus Sulcia muelleri GWSS	Candidatus Sulcia muelleri SMDSEM	Candidatus Zinderia insecticola CARI	Eubacterium siraeum	Eubacterium siraeum V10Sc8a	Megamonas hypermegale	Mesoplasma florum L1	Mycoplasma capricolum subsp. capricolum ATCC 27343	Mycoplasma gallisepticum str. F	Mycoplasma gallisepticum str. R(high)	Mycoplasma gallisepticum str. R(low)	Mycoplasma leachii PG50	Mycoplasma mycoides subsp. capri str. GM12 (deltatypeIIIres clone)	Mycoplasma mycoides subsp. capri str. GM12 (tetM-lacZ clone)	Mycoplasma mycoides subsp. mycoides SC str. Gladysdale	Mycoplasma mycoides subsp. mycoides SC str. PG1	Onion yellows phytoplasma OY-M	Orientia tsutsugamushi str. Boryong	Orientia tsutsugamushi str. Ikeda	Rickettsia africae ESF-5	Rickettsia akari str. Hartford
OG_00803028	adenylate kinase	1219	69	5	1224	0.950311	COG0563	F		Buchnera aphidicola str. Bp (Baizongia pistaciae)	Buchnera aphidicola str. Cc (Cinara cedri)	Campylobacter hominis ATCC BAA-381	Candidatus Carsonella ruddii PV	Candidatus Hodgkinia cicadicola Dsem	Candidatus Sulcia muelleri CARI	Candidatus Sulcia muelleri DMIN	Candidatus Sulcia muelleri GWSS	Candidatus Sulcia muelleri SMDSEM	Candidatus Zinderia insecticola CARI	Desulfobacterium autotrophicum HRM2	Helicobacter acinonychis str. Sheeba	Helicobacter felis ATCC 49179	Helicobacter hepaticus ATCC 51449	Helicobacter mustelae 12198	Helicobacter pylori	Helicobacter pylori 26695	Helicobacter pylori 35A	Helicobacter pylori 51	Helicobacter pylori 908	Helicobacter pylori B38	Helicobacter pylori B8	Helicobacter pylori Cuz20	Helicobacter pylori G27	Helicobacter pylori HPAG1	Helicobacter pylori J99	Helicobacter pylori P12	Helicobacter pylori PeCan4	Helicobacter pylori SJM180	Helicobacter pylori Sat464	Helicobacter pylori Shi470	Helicobacter pylori v225d	Nautilia profundicola AmH	Nitratiruptor sp. SB155-2	Rickettsia bellii OSU 85-389	Sulfurospirillum deleyianum DSM 6946	Sulfurovum sp. NBC37-1	Wolinella succinogenes DSM 1740	Campylobacter concisus 13826	Campylobacter curvus 525.92
OG_00486357	30S ribosomal protein S20	1202	86	22	1224	0.950311	COG0268	J		Anaeromyxobacter dehalogenans 2CP-1	Anaeromyxobacter dehalogenans 2CP-C	Anaeromyxobacter sp. Fw109-5	Anaeromyxobacter sp. K	Candidatus Carsonella ruddii PV	Candidatus Hodgkinia cicadicola Dsem	Candidatus Protochlamydia amoebophila UWE25	Candidatus Zinderia insecticola CARI	Chlamydia muridarum Nigg	Chlamydia trachomatis 434/Bu	Chlamydia trachomatis A/HAR-13	Chlamydia trachomatis B/Jali20/OT	Chlamydia trachomatis B/TZ1A828/OT	Chlamydia trachomatis D-EC	Chlamydia trachomatis D-LC	Chlamydia trachomatis D/UW-3/CX	Chlamydia trachomatis E/11023	Chlamydia trachomatis E/150	Chlamydia trachomatis G/11074	Chlamydia trachomatis G/11222	Chlamydia trachomatis G/9301	Chlamydia trachomatis G/9768	Chlamydia trachomatis L2b/UCH-1/proctitis	Chlamydia trachomatis Sweden2	Chlamydophila abortus S26/3	Chlamydophila caviae GPIC	Chlamydophila felis Fe/C-56	Chlamydophila pneumoniae AR39	Chlamydophila pneumoniae CWL029	Chlamydophila pneumoniae J138	Chlamydophila pneumoniae LPCoLN	Chlamydophila pneumoniae TW-183	Coprococcus catus GD/7	Eubacterium rectale DSM 17629	Eubacterium rectale M104/1	Eubacterium siraeum	Eubacterium siraeum V10Sc8a	Fibrobacter succinogenes subsp. succinogenes S85	Fibrobacter succinogenes subsp. succinogenes S85	Gemmatimonas aurantiaca T-27
OG_00486423	undecaprenyldiphospho-muramoylpentapeptide beta-N- acetylglucosaminyltransferase	1220	68	3	1223	0.949534	COG0707	M		Acholeplasma laidlawii PG-8A	Anaplasma phagocytophilum HZ	Aster yellows witches'-broom phytoplasma AYWB	Buchnera aphidicola str. Cc (Cinara cedri)	Candidatus Carsonella ruddii PV	Candidatus Hodgkinia cicadicola Dsem	Candidatus Phytoplasma australiense	Candidatus Phytoplasma mali	Candidatus Sulcia muelleri CARI	Candidatus Sulcia muelleri DMIN	Candidatus Sulcia muelleri GWSS	Candidatus Sulcia muelleri SMDSEM	Candidatus Zinderia insecticola CARI	Dehalococcoides ethenogenes 195	Dehalococcoides sp. BAV1	Dehalococcoides sp. CBDB1	Dehalococcoides sp. GT	Dehalococcoides sp. VS	Dehalogenimonas lykanthroporepellens BL-DC-9	Ehrlichia canis str. Jake	Ehrlichia chaffeensis str. Arkansas	Ehrlichia ruminantium str. Gardel	Ehrlichia ruminantium str. Welgevonden	Ehrlichia ruminantium str. Welgevonden	Eubacterium cylindroides T2-87	Mesoplasma florum L1	Mycoplasma agalactiae PG2	Mycoplasma arthritidis 158L3-1	Mycoplasma bovis PG45	Mycoplasma capricolum subsp. capricolum ATCC 27343	Mycoplasma conjunctivae HRC/581	Mycoplasma crocodyli MP145	Mycoplasma fermentans JER	Mycoplasma fermentans PG18	Mycoplasma gallisepticum str. F	Mycoplasma gallisepticum str. R(high)	Mycoplasma gallisepticum str. R(low)	Mycoplasma genitalium G37	Mycoplasma hominis	Mycoplasma hyopneumoniae 168
OG_00804286	transcription antitermination protein NusB	1216	72	7	1223	0.949534	COG0781	K		Caldicellulosiruptor bescii DSM 6725	Caldicellulosiruptor hydrothermalis 108	Caldicellulosiruptor kristjanssonii 177R1B	Caldicellulosiruptor kronotskyensis 2002	Caldicellulosiruptor obsidiansis OB47	Caldicellulosiruptor owensensis OL	Caldicellulosiruptor saccharolyticus DSM 8903	Candidatus Carsonella ruddii PV	Candidatus Hodgkinia cicadicola Dsem	Candidatus Sulcia muelleri CARI	Candidatus Sulcia muelleri DMIN	Candidatus Sulcia muelleri GWSS	Candidatus Sulcia muelleri SMDSEM	Candidatus Zinderia insecticola CARI	Carboxydothermus hydrogenoformans Z-2901	Coprothermobacter proteolyticus DSM 5265	Eubacterium cylindroides T2-87	Lactobacillus fermentum CECT 5716	Lactobacillus salivarius CECT 5713	Mesoplasma florum L1	Moorella thermoacetica ATCC 39073	Mycoplasma agalactiae PG2	Mycoplasma arthritidis 158L3-1	Mycoplasma bovis PG45	Mycoplasma capricolum subsp. capricolum ATCC 27343	Mycoplasma conjunctivae HRC/581	Mycoplasma crocodyli MP145	Mycoplasma fermentans JER	Mycoplasma fermentans PG18	Mycoplasma gallisepticum str. F	Mycoplasma gallisepticum str. R(high)	Mycoplasma gallisepticum str. R(low)	Mycoplasma genitalium G37	Mycoplasma hominis	Mycoplasma hyopneumoniae 168	Mycoplasma hyopneumoniae 232	Mycoplasma hyopneumoniae 7448	Mycoplasma hyopneumoniae J	Mycoplasma hyorhinis HUB-1	Mycoplasma leachii PG50
OG_00743491	protein of unknown function DUF21	1216	72	6	1222	0.948758	COG0517 (or COG1253)	RN		Alicyclobacillus acidocaldarius subsp. acidocaldarius DSM 446	Ammonifex degensii KC4	Bacillus halodurans C-125	Bacillus selenitireducens MLS10	Bartonella bacilliformis KC583	Bartonella grahamii as4aup	Bartonella henselae str. Houston-1	Bartonella quintana str. Toulouse	Bartonella tribocorum CIP 105476	Baumannia cicadellinicola str. Hc (Homalodisca coagulata)	Buchnera aphidicola str. Cc (Cinara cedri)	Caldicellulosiruptor bescii DSM 6725	Caldicellulosiruptor hydrothermalis 108	Caldicellulosiruptor kristjanssonii 177R1B	Caldicellulosiruptor kronotskyensis 2002	Caldicellulosiruptor obsidiansis OB47	Caldicellulosiruptor owensensis OL	Caldicellulosiruptor saccharolyticus DSM 8903	Candidatus Amoebophilus asiaticus 5a2	Candidatus Azobacteroides pseudotrichonymphae genomovar. CFP2	Candidatus Carsonella ruddii PV	Candidatus Hodgkinia cicadicola Dsem	Candidatus Liberibacter asiaticus str. psy62	Candidatus Liberibacter solanacearum CLso-ZC1	Candidatus Pelagibacter ubique HTCC1062	Candidatus Sulcia muelleri CARI	Candidatus Sulcia muelleri DMIN	Candidatus Sulcia muelleri GWSS	Candidatus Sulcia muelleri SMDSEM	Candidatus Zinderia insecticola CARI	Carboxydothermus hydrogenoformans Z-2901	Clostridium tetani E88	Heliobacterium modesticaldum Ice1	Mesoplasma florum L1	Moorella thermoacetica ATCC 39073	Mycoplasma capricolum subsp. capricolum ATCC 27343	Mycoplasma leachii PG50	Mycoplasma mobile 163K	Mycoplasma mycoides subsp. capri str. GM12 (deltatypeIIIres clone)	Mycoplasma mycoides subsp. capri str. GM12 (tetM-lacZ clone)
OG_00803966	UDP-N-acetylmuramoyl-L-alanyl-D-glutamate synthetase	1220	68	1	1221	0.947981	COG0771	M		Acholeplasma laidlawii PG-8A	Anaplasma phagocytophilum HZ	Aster yellows witches'-broom phytoplasma AYWB	Buchnera aphidicola str. Cc (Cinara cedri)	Candidatus Carsonella ruddii PV	Candidatus Hodgkinia cicadicola Dsem	Candidatus Phytoplasma australiense	Candidatus Phytoplasma mali	Candidatus Sulcia muelleri CARI	Candidatus Sulcia muelleri DMIN	Candidatus Sulcia muelleri GWSS	Candidatus Sulcia muelleri SMDSEM	Candidatus Zinderia insecticola CARI	Dehalococcoides ethenogenes 195	Dehalococcoides sp. BAV1	Dehalococcoides sp. CBDB1	Dehalococcoides sp. GT	Dehalococcoides sp. VS	Dehalogenimonas lykanthroporepellens BL-DC-9	Ehrlichia canis str. Jake	Ehrlichia chaffeensis str. Arkansas	Ehrlichia ruminantium str. Gardel	Ehrlichia ruminantium str. Welgevonden	Ehrlichia ruminantium str. Welgevonden	Leadbetterella byssophila DSM 17132	Mesoplasma florum L1	Mycoplasma agalactiae PG2	Mycoplasma arthritidis 158L3-1	Mycoplasma bovis PG45	Mycoplasma capricolum subsp. capricolum ATCC 27343	Mycoplasma conjunctivae HRC/581	Mycoplasma crocodyli MP145	Mycoplasma fermentans JER	Mycoplasma fermentans PG18	Mycoplasma gallisepticum str. F	Mycoplasma gallisepticum str. R(high)	Mycoplasma gallisepticum str. R(low)	Mycoplasma genitalium G37	Mycoplasma hominis	Mycoplasma hyopneumoniae 168
OG_00487008	phospho-N-acetylmuramoyl-pentapeptide- transferase	1212	76	9	1221	0.947981	COG0472	M		Acholeplasma laidlawii PG-8A	Anaplasma phagocytophilum HZ	Aster yellows witches'-broom phytoplasma AYWB	Buchnera aphidicola str. Cc (Cinara cedri)	Candidatus Carsonella ruddii PV	Candidatus Hodgkinia cicadicola Dsem	Candidatus Phytoplasma australiense	Candidatus Phytoplasma mali	Candidatus Sulcia muelleri CARI	Candidatus Sulcia muelleri DMIN	Candidatus Sulcia muelleri GWSS	Candidatus Sulcia muelleri SMDSEM	Candidatus Zinderia insecticola CARI	Dehalococcoides ethenogenes 195	Dehalococcoides sp. BAV1	Dehalococcoides sp. CBDB1	Dehalococcoides sp. GT	Dehalococcoides sp. VS	Dehalogenimonas lykanthroporepellens BL-DC-9	Ehrlichia canis str. Jake	Ehrlichia chaffeensis str. Arkansas	Ehrlichia ruminantium str. Gardel	Ehrlichia ruminantium str. Welgevonden	Ehrlichia ruminantium str. Welgevonden	Mesoplasma florum L1	Mycoplasma agalactiae PG2	Mycoplasma arthritidis 158L3-1	Mycoplasma bovis PG45	Mycoplasma capricolum subsp. capricolum ATCC 27343	Mycoplasma conjunctivae HRC/581	Mycoplasma crocodyli MP145	Mycoplasma fermentans JER	Mycoplasma fermentans PG18	Mycoplasma gallisepticum str. F	Mycoplasma gallisepticum str. R(high)	Mycoplasma gallisepticum str. R(low)	Mycoplasma genitalium G37	Mycoplasma hominis	Mycoplasma hyopneumoniae 168	Mycoplasma hyopneumoniae 232
OG_00485948	UDP-N-acetylmuramate--L-alanine ligase	1215	73	5	1220	0.947205	COG0773	M		Acholeplasma laidlawii PG-8A	Anaplasma phagocytophilum HZ	Aster yellows witches'-broom phytoplasma AYWB	Buchnera aphidicola str. Cc (Cinara cedri)	Candidatus Carsonella ruddii PV	Candidatus Hodgkinia cicadicola Dsem	Candidatus Phytoplasma australiense	Candidatus Phytoplasma mali	Candidatus Sulcia muelleri CARI	Candidatus Sulcia muelleri DMIN	Candidatus Sulcia muelleri GWSS	Candidatus Sulcia muelleri SMDSEM	Candidatus Zinderia insecticola CARI	Dehalococcoides ethenogenes 195	Dehalococcoides sp. BAV1	Dehalococcoides sp. CBDB1	Dehalococcoides sp. GT	Dehalococcoides sp. VS	Dehalogenimonas lykanthroporepellens BL-DC-9	Ehrlichia canis str. Jake	Ehrlichia chaffeensis str. Arkansas	Ehrlichia ruminantium str. Gardel	Ehrlichia ruminantium str. Welgevonden	Ehrlichia ruminantium str. Welgevonden	Leadbetterella byssophila DSM 17132	Mesoplasma florum L1	Mycoplasma agalactiae PG2	Mycoplasma arthritidis 158L3-1	Mycoplasma bovis PG45	Mycoplasma capricolum subsp. capricolum ATCC 27343	Mycoplasma conjunctivae HRC/581	Mycoplasma crocodyli MP145	Mycoplasma fermentans JER	Mycoplasma fermentans PG18	Mycoplasma gallisepticum str. F	Mycoplasma gallisepticum str. R(high)	Mycoplasma gallisepticum str. R(low)	Mycoplasma genitalium G37	Mycoplasma hominis	Mycoplasma hyopneumoniae 168
OG_00084366	ribosomal large subunit pseudouridine synthase B	1192	96	27	1219	0.946429	COG1187	J		Anaplasma centrale str. Israel	Anaplasma marginale str. Florida	Anaplasma marginale str. St. Maries	Anaplasma phagocytophilum HZ	Baumannia cicadellinicola str. Hc (Homalodisca coagulata)	Borrelia afzelii PKo	Borrelia burgdorferi B31	Borrelia burgdorferi JD1	Borrelia burgdorferi N40	Borrelia burgdorferi ZS7	Borrelia duttonii Ly	Borrelia garinii PBi	Borrelia hermsii DAH	Borrelia recurrentis A1	Borrelia turicatae 91E135	Candidatus Carsonella ruddii PV	Candidatus Hodgkinia cicadicola Dsem	Candidatus Pelagibacter ubique HTCC1062	Candidatus Riesia pediculicola USDA	Candidatus Sulcia muelleri DMIN	Candidatus Sulcia muelleri GWSS	Candidatus Sulcia muelleri SMDSEM	Candidatus Zinderia insecticola CARI	Coprothermobacter proteolyticus DSM 5265	Ehrlichia canis str. Jake	Ehrlichia chaffeensis str. Arkansas	Ehrlichia ruminantium str. Gardel	Ehrlichia ruminantium str. Welgevonden	Ehrlichia ruminantium str. Welgevonden	Elusimicrobium minutum Pei191	Leptospira borgpetersenii serovar Hardjo-bovis JB197	Leptospira borgpetersenii serovar Hardjo-bovis L550	Leptospira interrogans serovar Copenhageni str. Fiocruz L1-130	Leptospira interrogans serovar Lai str. 56601	Mycoplasma gallisepticum str. F	Mycoplasma gallisepticum str. R(high)	Mycoplasma gallisepticum str. R(low)	Mycoplasma genitalium G37	Mycoplasma penetrans HF-2	Mycoplasma pneumoniae FH
OG_00487145	endonuclease III	1187	101	32	1219	0.946429	COG0177	L		Aminobacterium colombiense DSM 12261	Aster yellows witches'-broom phytoplasma AYWB	Baumannia cicadellinicola str. Hc (Homalodisca coagulata)	Buchnera aphidicola str. Cc (Cinara cedri)	Candidatus Amoebophilus asiaticus 5a2	Candidatus Carsonella ruddii PV	Candidatus Desulforudis audaxviator MP104C	Candidatus Hodgkinia cicadicola Dsem	Candidatus Phytoplasma australiense	Candidatus Phytoplasma mali	Candidatus Sulcia muelleri CARI	Candidatus Sulcia muelleri DMIN	Candidatus Sulcia muelleri GWSS	Candidatus Sulcia muelleri SMDSEM	Candidatus Zinderia insecticola CARI	Clavibacter michiganensis subsp. michiganensis NCPPB 382	Clavibacter michiganensis subsp. sepedonicus	Herpetosiphon aurantiacus ATCC 23779	Lactobacillus fermentum CECT 5716	Lactobacillus fermentum IFO 3956	Leifsonia xyli subsp. xyli str. CTCB07	Leuconostoc citreum KM20	Leuconostoc gasicomitatum LMG 18811	Leuconostoc kimchii IMSNU 11154	Leuconostoc mesenteroides subsp. mesenteroides ATCC 8293	Mesoplasma florum L1	Mobiluncus curtisii ATCC 43063	Mycoplasma agalactiae PG2	Mycoplasma arthritidis 158L3-1	Mycoplasma bovis PG45	Mycoplasma capricolum subsp. capricolum ATCC 27343	Mycoplasma conjunctivae HRC/581	Mycoplasma crocodyli MP145	Mycoplasma fermentans JER	Mycoplasma fermentans PG18	Mycoplasma gallisepticum str. F	Mycoplasma gallisepticum str. R(high)	Mycoplasma gallisepticum str. R(low)	Mycoplasma genitalium G37	Mycoplasma hominis
OG_00803686	inorganic polyphosphate/ATP-NAD kinase	1215	73	3	1218	0.945652	COG0061	R		Acholeplasma laidlawii PG-8A	Aster yellows witches'-broom phytoplasma AYWB	Buchnera aphidicola str. Cc (Cinara cedri)	Candidatus Amoebophilus asiaticus 5a2	Candidatus Carsonella ruddii PV	Candidatus Hodgkinia cicadicola Dsem	Candidatus Phytoplasma australiense	Candidatus Phytoplasma mali	Candidatus Sulcia muelleri CARI	Candidatus Sulcia muelleri DMIN	Candidatus Sulcia muelleri GWSS	Candidatus Sulcia muelleri SMDSEM	Candidatus Zinderia insecticola CARI	Chlamydia muridarum Nigg	Chlamydia trachomatis 434/Bu	Chlamydia trachomatis A/HAR-13	Chlamydia trachomatis B/Jali20/OT	Chlamydia trachomatis B/TZ1A828/OT	Chlamydia trachomatis D-EC	Chlamydia trachomatis D-LC	Chlamydia trachomatis D/UW-3/CX	Chlamydia trachomatis E/11023	Chlamydia trachomatis E/150	Chlamydia trachomatis G/11074	Chlamydia trachomatis G/11222	Chlamydia trachomatis G/9301	Chlamydia trachomatis G/9768	Chlamydia trachomatis L2b/UCH-1/proctitis	Chlamydia trachomatis Sweden2	Chlamydophila abortus S26/3	Chlamydophila caviae GPIC	Chlamydophila felis Fe/C-56	Chlamydophila pneumoniae AR39	Chlamydophila pneumoniae CWL029	Chlamydophila pneumoniae J138	Chlamydophila pneumoniae LPCoLN	Chlamydophila pneumoniae TW-183	Deinococcus deserti VCD115	Deinococcus geothermalis DSM 11300	Deinococcus radiodurans R1
OG_00636131	16S rRNA methyltransferase GidB	1206	82	10	1216	0.944099	COG0357	M		Akkermansia muciniphila ATCC BAA-835	Anaplasma centrale str. Israel	Anaplasma marginale str. Florida	Anaplasma marginale str. St. Maries	Anaplasma phagocytophilum HZ	Bacteriovorax marinus SJ	Baumannia cicadellinicola str. Hc (Homalodisca coagulata)	Buchnera aphidicola str. 5A (Acyrthosiphon pisum)	Buchnera aphidicola str. APS (Acyrthosiphon pisum)	Buchnera aphidicola str. Bp (Baizongia pistaciae)	Buchnera aphidicola str. Cc (Cinara cedri)	Buchnera aphidicola str. JF98 (Acyrthosiphon pisum)	Buchnera aphidicola str. JF99 (Acyrthosiphon pisum)	Buchnera aphidicola str. LL01 (Acyrthosiphon pisum)	Buchnera aphidicola str. Sg (Schizaphis graminum)	Buchnera aphidicola str. TLW03 (Acyrthosiphon pisum)	Buchnera aphidicola str. Tuc7 (Acyrthosiphon pisum)	Candidatus Blochmannia floridanus	Candidatus Blochmannia pennsylvanicus str. BPEN	Candidatus Carsonella ruddii PV	Candidatus Hodgkinia cicadicola Dsem	Candidatus Phytoplasma mali	Candidatus Protochlamydia amoebophila UWE25	Candidatus Riesia pediculicola USDA	Candidatus Vesicomyosocius okutanii HA	Candidatus Zinderia insecticola CARI	Chlamydia muridarum Nigg	Chlamydia trachomatis 434/Bu	Chlamydia trachomatis A/HAR-13	Chlamydia trachomatis B/Jali20/OT	Chlamydia trachomatis B/TZ1A828/OT	Chlamydia trachomatis D-EC	Chlamydia trachomatis D-LC	Chlamydia trachomatis D/UW-3/CX	Chlamydia trachomatis E/11023	Chlamydia trachomatis E/150	Chlamydia trachomatis G/11074	Chlamydia trachomatis G/11222	Chlamydia trachomatis G/9301	Chlamydia trachomatis G/9768
OG_00764199	polynucleotide phosphorylase/polyadenylase	1204	84	12	1216	0.944099	COG1185	J		Candidatus Carsonella ruddii PV	Candidatus Hodgkinia cicadicola Dsem	Candidatus Zinderia insecticola CARI	Ethanoligenens harbinense YUAN-3	Lactobacillus acidophilus NCFM	Lactobacillus amylovorus GRL 1112	Lactobacillus casei ATCC 334	Lactobacillus casei BL23	Lactobacillus casei str. Zhang	Lactobacillus crispatus ST1	Lactobacillus delbrueckii subsp. bulgaricus ATCC 11842	Lactobacillus delbrueckii subsp. bulgaricus ATCC BAA-365	Lactobacillus delbrueckii subsp. bulgaricus ND02	Lactobacillus gasseri ATCC 33323	Lactobacillus helveticus DPC 4571	Lactobacillus johnsonii FI9785	Lactobacillus johnsonii NCC 533	Lactobacillus plantarum JDM1	Lactobacillus plantarum WCFS1	Lactobacillus plantarum subsp. plantarum ST-III	Lactobacillus sakei subsp. sakei 23K	Leuconostoc citreum KM20	Leuconostoc gasicomitatum LMG 18811	Leuconostoc kimchii IMSNU 11154	Leuconostoc mesenteroides subsp. mesenteroides ATCC 8293	Mesoplasma florum L1	Mycoplasma agalactiae PG2	Mycoplasma arthritidis 158L3-1	Mycoplasma bovis PG45	Mycoplasma capricolum subsp. capricolum ATCC 27343	Mycoplasma conjunctivae HRC/581	Mycoplasma crocodyli MP145	Mycoplasma fermentans JER	Mycoplasma fermentans PG18	Mycoplasma gallisepticum str. F	Mycoplasma gallisepticum str. R(high)	Mycoplasma gallisepticum str. R(low)	Mycoplasma genitalium G37	Mycoplasma hominis	Mycoplasma hyopneumoniae 168
OG_00779047	GTP-binding protein Era	1210	78	5	1215	0.943323	COG1159	R		Akkermansia muciniphila ATCC BAA-835	Brachyspira hyodysenteriae WA1	Brachyspira murdochii DSM 12563	Brachyspira pilosicoli 95/1000	Buchnera aphidicola str. Cc (Cinara cedri)	Candidatus Blochmannia floridanus	Candidatus Blochmannia pennsylvanicus str. BPEN	Candidatus Carsonella ruddii PV	Candidatus Hodgkinia cicadicola Dsem	Candidatus Pelagibacter ubique HTCC1062	Candidatus Protochlamydia amoebophila UWE25	Candidatus Riesia pediculicola USDA	Candidatus Sulcia muelleri DMIN	Candidatus Sulcia muelleri GWSS	Candidatus Sulcia muelleri SMDSEM	Candidatus Zinderia insecticola CARI	Chlamydia muridarum Nigg	Chlamydia trachomatis 434/Bu	Chlamydia trachomatis A/HAR-13	Chlamydia trachomatis B/Jali20/OT	Chlamydia trachomatis B/TZ1A828/OT	Chlamydia trachomatis D-EC	Chlamydia trachomatis D-LC	Chlamydia trachomatis D/UW-3/CX	Chlamydia trachomatis E/11023	Chlamydia trachomatis E/150	Chlamydia trachomatis G/11074	Chlamydia trachomatis G/11222	Chlamydia trachomatis G/9301	Chlamydia trachomatis G/9768	Chlamydia trachomatis L2b/UCH-1/proctitis	Chlamydia trachomatis Sweden2	Chlamydophila abortus S26/3	Chlamydophila caviae GPIC	Chlamydophila felis Fe/C-56	Chlamydophila pneumoniae AR39	Chlamydophila pneumoniae CWL029	Chlamydophila pneumoniae J138	Chlamydophila pneumoniae LPCoLN	Chlamydophila pneumoniae TW-183
OG_00871589	F0F1 ATP synthase subunit alpha	1208	80	6	1214	0.942547	COG0056	C		Aminobacterium colombiense DSM 12261	Anaerococcus prevotii DSM 20548	Aster yellows witches'-broom phytoplasma AYWB	Borrelia afzelii PKo	Borrelia burgdorferi B31	Borrelia burgdorferi JD1	Borrelia burgdorferi N40	Borrelia burgdorferi ZS7	Borrelia duttonii Ly	Borrelia garinii PBi	Borrelia hermsii DAH	Borrelia recurrentis A1	Borrelia turicatae 91E135	Buchnera aphidicola str. Cc (Cinara cedri)	Candidatus Hodgkinia cicadicola Dsem	Candidatus Phytoplasma australiense	Candidatus Phytoplasma mali	Candidatus Riesia pediculicola USDA	Candidatus Zinderia insecticola CARI	Chlamydia muridarum Nigg	Chlamydia trachomatis 434/Bu	Chlamydia trachomatis A/HAR-13	Chlamydia trachomatis B/Jali20/OT	Chlamydia trachomatis B/TZ1A828/OT	Chlamydia trachomatis D-EC	Chlamydia trachomatis D-LC	Chlamydia trachomatis D/UW-3/CX	Chlamydia trachomatis E/11023	Chlamydia trachomatis E/150	Chlamydia trachomatis G/11074	Chlamydia trachomatis G/11222	Chlamydia trachomatis G/9301	Chlamydia trachomatis G/9768	Chlamydia trachomatis L2b/UCH-1/proctitis	Chlamydia trachomatis Sweden2	Chlamydophila abortus S26/3	Chlamydophila caviae GPIC	Chlamydophila felis Fe/C-56	Chlamydophila pneumoniae AR39	Chlamydophila pneumoniae CWL029
OG_00486269	Sua5/YciO/YrdC/YwlC family protein	1203	85	11	1214	0.942547	COG0009	J		Arcobacter butzleri RM4018	Arcobacter nitrofigilis DSM 7299	Bacteriovorax marinus SJ	Buchnera aphidicola str. Cc (Cinara cedri)	Campylobacter concisus 13826	Campylobacter curvus 525.92	Campylobacter fetus subsp. fetus 82-40	Campylobacter hominis ATCC BAA-381	Campylobacter jejuni RM1221	Campylobacter jejuni subsp. doylei 269.97	Campylobacter jejuni subsp. jejuni 81-176	Campylobacter jejuni subsp. jejuni 81116	Campylobacter jejuni subsp. jejuni IA3902	Campylobacter jejuni subsp. jejuni ICDCCJ07001	Campylobacter jejuni subsp. jejuni M1	Campylobacter jejuni subsp. jejuni NCTC 11168	Campylobacter jejuni subsp. jejuni S3	Campylobacter lari RM2100	Candidatus Carsonella ruddii PV	Candidatus Hodgkinia cicadicola Dsem	Candidatus Sulcia muelleri CARI	Candidatus Sulcia muelleri DMIN	Candidatus Sulcia muelleri GWSS	Candidatus Sulcia muelleri SMDSEM	Candidatus Zinderia insecticola CARI	Geobacter bemidjiensis Bem	Geobacter lovleyi SZ	Geobacter metallireducens GS-15	Geobacter sp. FRC-32	Geobacter sp. M21	Geobacter sulfurreducens KN400	Geobacter sulfurreducens PCA	Geobacter uraniireducens Rf4	Gordonibacter pamelaeae 7-10-1-b	Helicobacter acinonychis str. Sheeba	Helicobacter felis ATCC 49179	Helicobacter hepaticus ATCC 51449	Helicobacter mustelae 12198	Helicobacter pylori	Helicobacter pylori 26695
OG_00485987	F0F1 ATP synthase subunit beta	1197	91	17	1214	0.942547	COG0055	C		Alistipes shahii WAL 8301	Aminobacterium colombiense DSM 12261	Anaerococcus prevotii DSM 20548	Aster yellows witches'-broom phytoplasma AYWB	Borrelia afzelii PKo	Borrelia burgdorferi B31	Borrelia burgdorferi JD1	Borrelia burgdorferi N40	Borrelia burgdorferi ZS7	Borrelia duttonii Ly	Borrelia garinii PBi	Borrelia hermsii DAH	Borrelia recurrentis A1	Borrelia turicatae 91E135	Buchnera aphidicola str. Cc (Cinara cedri)	Candidatus Hodgkinia cicadicola Dsem	Candidatus Phytoplasma australiense	Candidatus Phytoplasma mali	Candidatus Riesia pediculicola USDA	Candidatus Zinderia insecticola CARI	Chlamydia muridarum Nigg	Chlamydia trachomatis 434/Bu	Chlamydia trachomatis A/HAR-13	Chlamydia trachomatis B/Jali20/OT	Chlamydia trachomatis B/TZ1A828/OT	Chlamydia trachomatis D-EC	Chlamydia trachomatis D-LC	Chlamydia trachomatis D/UW-3/CX	Chlamydia trachomatis E/11023	Chlamydia trachomatis E/150	Chlamydia trachomatis G/11074	Chlamydia trachomatis G/11222	Chlamydia trachomatis G/9301	Chlamydia trachomatis G/9768	Chlamydia trachomatis L2b/UCH-1/proctitis	Chlamydia trachomatis Sweden2	Chlamydophila abortus S26/3	Chlamydophila caviae GPIC	Chlamydophila felis Fe/C-56	Chlamydophila pneumoniae AR39
OG_00487149	F0F1 ATP synthase subunit gamma	1210	78	3	1213	0.94177	COG0224	C		Alistipes shahii WAL 8301	Aminobacterium colombiense DSM 12261	Anaerococcus prevotii DSM 20548	Aster yellows witches'-broom phytoplasma AYWB	Borrelia afzelii PKo	Borrelia burgdorferi B31	Borrelia burgdorferi JD1	Borrelia burgdorferi N40	Borrelia burgdorferi ZS7	Borrelia duttonii Ly	Borrelia garinii PBi	Borrelia hermsii DAH	Borrelia recurrentis A1	Borrelia turicatae 91E135	Buchnera aphidicola str. Cc (Cinara cedri)	Candidatus Hodgkinia cicadicola Dsem	Candidatus Phytoplasma australiense	Candidatus Phytoplasma mali	Candidatus Riesia pediculicola USDA	Candidatus Zinderia insecticola CARI	Chlamydia muridarum Nigg	Chlamydia trachomatis 434/Bu	Chlamydia trachomatis A/HAR-13	Chlamydia trachomatis B/Jali20/OT	Chlamydia trachomatis B/TZ1A828/OT	Chlamydia trachomatis D-EC	Chlamydia trachomatis D-LC	Chlamydia trachomatis D/UW-3/CX	Chlamydia trachomatis E/11023	Chlamydia trachomatis E/150	Chlamydia trachomatis G/11074	Chlamydia trachomatis G/11222	Chlamydia trachomatis G/9301	Chlamydia trachomatis G/9768	Chlamydia trachomatis L2b/UCH-1/proctitis	Chlamydia trachomatis Sweden2	Chlamydophila abortus S26/3	Chlamydophila caviae GPIC	Chlamydophila felis Fe/C-56	Chlamydophila pneumoniae AR39
OG_00486087	UDP-N-acetylmuramoylalanyl-D-glutamate--2, 6-diaminopimelate ligase	1181	107	32	1213	0.94177	COG0769	M		Acholeplasma laidlawii PG-8A	Anaplasma phagocytophilum HZ	Aster yellows witches'-broom phytoplasma AYWB	Buchnera aphidicola str. Cc (Cinara cedri)	Candidatus Carsonella ruddii PV	Candidatus Hodgkinia cicadicola Dsem	Candidatus Phytoplasma australiense	Candidatus Phytoplasma mali	Candidatus Sulcia muelleri CARI	Candidatus Sulcia muelleri DMIN	Candidatus Sulcia muelleri GWSS	Candidatus Sulcia muelleri SMDSEM	Candidatus Zinderia insecticola CARI	Coprothermobacter proteolyticus DSM 5265	Dehalococcoides ethenogenes 195	Dehalococcoides sp. BAV1	Dehalococcoides sp. CBDB1	Dehalococcoides sp. GT	Dehalococcoides sp. VS	Dehalogenimonas lykanthroporepellens BL-DC-9	Ehrlichia canis str. Jake	Ehrlichia chaffeensis str. Arkansas	Ehrlichia ruminantium str. Gardel	Ehrlichia ruminantium str. Welgevonden	Ehrlichia ruminantium str. Welgevonden	Eubacterium cylindroides T2-87	Mesoplasma florum L1	Mycoplasma agalactiae PG2	Mycoplasma arthritidis 158L3-1	Mycoplasma bovis PG45	Mycoplasma capricolum subsp. capricolum ATCC 27343	Mycoplasma conjunctivae HRC/581	Mycoplasma crocodyli MP145	Mycoplasma fermentans JER	Mycoplasma fermentans PG18	Mycoplasma gallisepticum str. F	Mycoplasma gallisepticum str. R(high)	Mycoplasma gallisepticum str. R(low)	Mycoplasma genitalium G37	Mycoplasma hominis
OG_00487083	phosphopantetheine adenylyltransferase	1195	93	14	1209	0.938665	COG0669	H		Aster yellows witches'-broom phytoplasma AYWB	Buchnera aphidicola str. Bp (Baizongia pistaciae)	Buchnera aphidicola str. Cc (Cinara cedri)	Candidatus Amoebophilus asiaticus 5a2	Candidatus Blochmannia floridanus	Candidatus Carsonella ruddii PV	Candidatus Hodgkinia cicadicola Dsem	Candidatus Phytoplasma australiense	Candidatus Phytoplasma mali	Candidatus Protochlamydia amoebophila UWE25	Candidatus Sulcia muelleri CARI	Candidatus Sulcia muelleri DMIN	Candidatus Sulcia muelleri GWSS	Candidatus Sulcia muelleri SMDSEM	Candidatus Zinderia insecticola CARI	Chlamydia muridarum Nigg	Chlamydia trachomatis 434/Bu	Chlamydia trachomatis A/HAR-13	Chlamydia trachomatis B/Jali20/OT	Chlamydia trachomatis B/TZ1A828/OT	Chlamydia trachomatis D-EC	Chlamydia trachomatis D-LC	Chlamydia trachomatis D/UW-3/CX	Chlamydia trachomatis E/11023	Chlamydia trachomatis E/150	Chlamydia trachomatis G/11074	Chlamydia trachomatis G/11222	Chlamydia trachomatis G/9301	Chlamydia trachomatis G/9768	Chlamydia trachomatis L2b/UCH-1/proctitis	Chlamydia trachomatis Sweden2	Chlamydophila abortus S26/3	Chlamydophila caviae GPIC	Chlamydophila felis Fe/C-56	Chlamydophila pneumoniae AR39	Chlamydophila pneumoniae CWL029	Chlamydophila pneumoniae J138	Chlamydophila pneumoniae LPCoLN	Chlamydophila pneumoniae TW-183	Coprococcus sp. ART55/1
OG_00732074	aspartate kinase	1194	94	13	1207	0.937112	COG0527	E		Anaerococcus prevotii DSM 20548	Anaplasma phagocytophilum HZ	Arcanobacterium haemolyticum DSM 20595	Aster yellows witches'-broom phytoplasma AYWB	Baumannia cicadellinicola str. Hc (Homalodisca coagulata)	Borrelia afzelii PKo	Borrelia burgdorferi B31	Borrelia burgdorferi JD1	Borrelia burgdorferi N40	Borrelia burgdorferi ZS7	Borrelia duttonii Ly	Borrelia garinii PBi	Borrelia hermsii DAH	Borrelia recurrentis A1	Borrelia turicatae 91E135	Candidatus Hodgkinia cicadicola Dsem	Candidatus Phytoplasma australiense	Candidatus Phytoplasma mali	Candidatus Zinderia insecticola CARI	Desulfotalea psychrophila LSv54	Eubacterium cylindroides T2-87	Fusobacterium nucleatum subsp. nucleatum ATCC 25586	Lactobacillus brevis ATCC 367	Lactobacillus johnsonii NCC 533	Lactobacillus sakei subsp. sakei 23K	Mesoplasma florum L1	Mycoplasma agalactiae PG2	Mycoplasma arthritidis 158L3-1	Mycoplasma bovis PG45	Mycoplasma capricolum subsp. capricolum ATCC 27343	Mycoplasma conjunctivae HRC/581	Mycoplasma crocodyli MP145	Mycoplasma fermentans JER	Mycoplasma fermentans PG18	Mycoplasma gallisepticum str. F	Mycoplasma gallisepticum str. R(high)	Mycoplasma gallisepticum str. R(low)	Mycoplasma genitalium G37	Mycoplasma hominis	Mycoplasma hyopneumoniae 168
OG_00605287	thioredoxin	1198	90	7	1205	0.935559	COG0526	OC		Alkaliphilus metalliredigens QYMF	Aminobacterium colombiense DSM 12261	Arcanobacterium haemolyticum DSM 20595	Aster yellows witches'-broom phytoplasma AYWB	Bifidobacterium adolescentis ATCC 15703	Bifidobacterium animalis subsp. lactis AD011	Bifidobacterium animalis subsp. lactis BB-12	Bifidobacterium animalis subsp. lactis Bl-04	Bifidobacterium animalis subsp. lactis DSM 10140	Bifidobacterium animalis subsp. lactis V9	Bifidobacterium bifidum PRL2010	Bifidobacterium bifidum S17	Bifidobacterium dentium Bd1	Bifidobacterium longum DJO10A	Bifidobacterium longum NCC2705	Bifidobacterium longum subsp. infantis ATCC 15697	Bifidobacterium longum subsp. longum BBMN68	Bifidobacterium longum subsp. longum F8	Bifidobacterium longum subsp. longum JDM301	Brachybacterium faecium DSM 4810	Candidatus Carsonella ruddii PV	Candidatus Hodgkinia cicadicola Dsem	Candidatus Phytoplasma australiense	Candidatus Phytoplasma mali	Candidatus Sulcia muelleri CARI	Candidatus Sulcia muelleri DMIN	Candidatus Sulcia muelleri GWSS	Candidatus Sulcia muelleri SMDSEM	Candidatus Zinderia insecticola CARI	Clostridium sticklandii DSM 519	Coprothermobacter proteolyticus DSM 5265	Dictyoglomus thermophilum H-6-12	Dictyoglomus turgidum DSM 6724	Fervidobacterium nodosum Rt17-B1	Kosmotoga olearia TBF 19.5.1	Mesoplasma florum L1	Mycoplasma agalactiae PG2	Mycoplasma arthritidis 158L3-1	Mycoplasma bovis PG45	Mycoplasma capricolum subsp. capricolum ATCC 27343
OG_00372429	Glucose-6-phosphate isomerase	1166	122	39	1205	0.935559	COG0166	G		Alkaliphilus oremlandii OhILAs	Anaplasma centrale str. Israel	Anaplasma marginale str. Florida	Anaplasma marginale str. St. Maries	Anaplasma phagocytophilum HZ	Aquifex aeolicus VF5	Blattabacterium sp. (Blattella germanica) str. Bge	Blattabacterium sp. (Periplaneta americana) str. BPLAN	Caldicellulosiruptor bescii DSM 6725	Caldicellulosiruptor hydrothermalis 108	Caldicellulosiruptor kristjanssonii 177R1B	Caldicellulosiruptor kronotskyensis 2002	Caldicellulosiruptor obsidiansis OB47	Caldicellulosiruptor owensensis OL	Caldicellulosiruptor saccharolyticus DSM 8903	Candidatus Amoebophilus asiaticus 5a2	Candidatus Carsonella ruddii PV	Candidatus Desulforudis audaxviator MP104C	Candidatus Hodgkinia cicadicola Dsem	Candidatus Liberibacter asiaticus str. psy62	Candidatus Liberibacter solanacearum CLso-ZC1	Candidatus Sulcia muelleri CARI	Candidatus Sulcia muelleri DMIN	Candidatus Sulcia muelleri GWSS	Candidatus Sulcia muelleri SMDSEM	Candidatus Zinderia insecticola CARI	Coprothermobacter proteolyticus DSM 5265	Dehalococcoides ethenogenes 195	Dehalococcoides sp. BAV1	Dehalococcoides sp. CBDB1	Dehalococcoides sp. GT	Dehalococcoides sp. VS	Dehalogenimonas lykanthroporepellens BL-DC-9	Dictyoglomus thermophilum H-6-12	Dictyoglomus turgidum DSM 6724	Ehrlichia canis str. Jake	Ehrlichia chaffeensis str. Arkansas	Ehrlichia ruminantium str. Gardel	Ehrlichia ruminantium str. Welgevonden	Ehrlichia ruminantium str. Welgevonden
OG_00804224	protease Do	1199	89	3	1202	0.93323	COG0265	O		Acholeplasma laidlawii PG-8A	Aster yellows witches'-broom phytoplasma AYWB	Buchnera aphidicola str. Cc (Cinara cedri)	Candidatus Carsonella ruddii PV	Candidatus Hodgkinia cicadicola Dsem	Candidatus Liberibacter asiaticus str. psy62	Candidatus Liberibacter solanacearum CLso-ZC1	Candidatus Phytoplasma australiense	Candidatus Phytoplasma mali	Candidatus Ruthia magnifica str. Cm (Calyptogena magnifica)	Candidatus Sulcia muelleri CARI	Candidatus Sulcia muelleri DMIN	Candidatus Sulcia muelleri GWSS	Candidatus Sulcia muelleri SMDSEM	Candidatus Vesicomyosocius okutanii HA	Candidatus Zinderia insecticola CARI	Elusimicrobium minutum Pei191	Fibrobacter succinogenes subsp. succinogenes S85	Fibrobacter succinogenes subsp. succinogenes S85	Francisella novicida U112	Francisella philomiragia subsp. philomiragia ATCC 25017	Francisella tularensis subsp. holarctica FTNF002-00	Francisella tularensis subsp. holarctica LVS	Francisella tularensis subsp. holarctica OSU18	Francisella tularensis subsp. mediasiatica FSC147	Francisella tularensis subsp. tularensis FSC198	Francisella tularensis subsp. tularensis NE061598	Francisella tularensis subsp. tularensis SCHU S4	Francisella tularensis subsp. tularensis WY96-3418	Fusobacterium nucleatum subsp. nucleatum ATCC 25586	Ilyobacter polytropus DSM 2926	Mesoplasma florum L1	Mycoplasma agalactiae PG2	Mycoplasma arthritidis 158L3-1	Mycoplasma bovis PG45	Mycoplasma capricolum subsp. capricolum ATCC 27343	Mycoplasma conjunctivae HRC/581	Mycoplasma crocodyli MP145	Mycoplasma fermentans JER	Mycoplasma fermentans PG18
OG_00778584	16S ribosomal RNA methyltransferase RsmE	1196	92	6	1202	0.93323	COG0366	G		Anaerococcus prevotii DSM 20548	Aster yellows witches'-broom phytoplasma AYWB	Atopobium parvulum DSM 20469	Baumannia cicadellinicola str. Hc (Homalodisca coagulata)	Blattabacterium sp. (Blattella germanica) str. Bge	Blattabacterium sp. (Periplaneta americana) str. BPLAN	Buchnera aphidicola str. Bp (Baizongia pistaciae)	Buchnera aphidicola str. Cc (Cinara cedri)	Candidatus Amoebophilus asiaticus 5a2	Candidatus Azobacteroides pseudotrichonymphae genomovar. CFP2	Candidatus Blochmannia floridanus	Candidatus Blochmannia pennsylvanicus str. BPEN	Candidatus Carsonella ruddii PV	Candidatus Hodgkinia cicadicola Dsem	Candidatus Phytoplasma australiense	Candidatus Phytoplasma mali	Candidatus Riesia pediculicola USDA	Candidatus Ruthia magnifica str. Cm (Calyptogena magnifica)	Candidatus Sulcia muelleri CARI	Candidatus Sulcia muelleri DMIN	Candidatus Sulcia muelleri GWSS	Candidatus Sulcia muelleri SMDSEM	Candidatus Zinderia insecticola CARI	Chlamydia muridarum Nigg	Chlamydia trachomatis 434/Bu	Chlamydia trachomatis A/HAR-13	Chlamydia trachomatis B/Jali20/OT	Chlamydia trachomatis B/TZ1A828/OT	Chlamydia trachomatis D-EC	Chlamydia trachomatis D-LC	Chlamydia trachomatis D/UW-3/CX	Chlamydia trachomatis E/11023	Chlamydia trachomatis E/150	Chlamydia trachomatis G/11074	Chlamydia trachomatis G/11222	Chlamydia trachomatis G/9301	Chlamydia trachomatis G/9768	Chlamydia trachomatis L2b/UCH-1/proctitis	Chlamydia trachomatis Sweden2	Chlamydophila abortus S26/3
OG_00721630	porphobilinogen deaminase	1192	96	9	1201	0.932453	COG0007	H		Anaerococcus prevotii DSM 20548	Aster yellows witches'-broom phytoplasma AYWB	Butyrivibrio proteoclasticus B316	Caldicellulosiruptor obsidiansis OB47	Caldicellulosiruptor owensensis OL	Candidatus Carsonella ruddii PV	Candidatus Hodgkinia cicadicola Dsem	Candidatus Phytoplasma australiense	Candidatus Phytoplasma mali	Candidatus Sulcia muelleri CARI	Candidatus Sulcia muelleri DMIN	Candidatus Sulcia muelleri GWSS	Candidatus Sulcia muelleri SMDSEM	Candidatus Zinderia insecticola CARI	Coprothermobacter proteolyticus DSM 5265	Dehalococcoides ethenogenes 195	Dehalococcoides sp. BAV1	Dehalococcoides sp. CBDB1	Dehalococcoides sp. GT	Dehalococcoides sp. VS	Dictyoglomus thermophilum H-6-12	Dictyoglomus turgidum DSM 6724	Elusimicrobium minutum Pei191	Eubacterium siraeum	Eubacterium siraeum V10Sc8a	Fervidobacterium nodosum Rt17-B1	Finegoldia magna ATCC 29328	Gardnerella vaginalis ATCC 14019	Halothermothrix orenii H 168	Kosmotoga olearia TBF 19.5.1	Lactobacillus acidophilus NCFM	Lactobacillus amylovorus GRL 1112	Lactobacillus crispatus ST1	Lactobacillus fermentum CECT 5716	Lactobacillus fermentum IFO 3956	Lactobacillus gasseri ATCC 33323	Lactobacillus helveticus DPC 4571	Lactobacillus johnsonii FI9785	Lactobacillus johnsonii NCC 533	Mesoplasma florum L1
OG_00803249	GMP synthase	1188	100	9	1197	0.929348	COG0519	F		Acholeplasma laidlawii PG-8A	Aster yellows witches'-broom phytoplasma AYWB	Borrelia hermsii DAH	Borrelia turicatae 91E135	Buchnera aphidicola str. 5A (Acyrthosiphon pisum)	Buchnera aphidicola str. APS (Acyrthosiphon pisum)	Buchnera aphidicola str. Bp (Baizongia pistaciae)	Buchnera aphidicola str. Cc (Cinara cedri)	Buchnera aphidicola str. JF98 (Acyrthosiphon pisum)	Buchnera aphidicola str. JF99 (Acyrthosiphon pisum)	Buchnera aphidicola str. LL01 (Acyrthosiphon pisum)	Buchnera aphidicola str. Sg (Schizaphis graminum)	Buchnera aphidicola str. TLW03 (Acyrthosiphon pisum)	Buchnera aphidicola str. Tuc7 (Acyrthosiphon pisum)	Candidatus Amoebophilus asiaticus 5a2	Candidatus Carsonella ruddii PV	Candidatus Hodgkinia cicadicola Dsem	Candidatus Phytoplasma australiense	Candidatus Phytoplasma mali	Candidatus Protochlamydia amoebophila UWE25	Candidatus Sulcia muelleri CARI	Candidatus Sulcia muelleri DMIN	Candidatus Sulcia muelleri GWSS	Candidatus Sulcia muelleri SMDSEM	Candidatus Zinderia insecticola CARI	Chlamydia trachomatis 434/Bu	Chlamydia trachomatis A/HAR-13	Chlamydia trachomatis B/Jali20/OT	Chlamydia trachomatis B/TZ1A828/OT	Chlamydia trachomatis D-EC	Chlamydia trachomatis D-LC	Chlamydia trachomatis D/UW-3/CX	Chlamydia trachomatis E/11023	Chlamydia trachomatis E/150	Chlamydia trachomatis G/11074	Chlamydia trachomatis G/11222	Chlamydia trachomatis G/9301	Chlamydia trachomatis G/9768	Chlamydia trachomatis L2b/UCH-1/proctitis	Chlamydia trachomatis Sweden2
OG_00778648	F0F1 ATP synthase subunit A	1193	95	3	1196	0.928571	COG0356	C		Alistipes shahii WAL 8301	Aminobacterium colombiense DSM 12261	Anaerococcus prevotii DSM 20548	Aster yellows witches'-broom phytoplasma AYWB	Borrelia afzelii PKo	Borrelia burgdorferi B31	Borrelia burgdorferi JD1	Borrelia burgdorferi N40	Borrelia burgdorferi ZS7	Borrelia duttonii Ly	Borrelia garinii PBi	Borrelia hermsii DAH	Borrelia recurrentis A1	Borrelia turicatae 91E135	Buchnera aphidicola str. Cc (Cinara cedri)	Candidatus Hodgkinia cicadicola Dsem	Candidatus Phytoplasma australiense	Candidatus Phytoplasma mali	Candidatus Riesia pediculicola USDA	Candidatus Zinderia insecticola CARI	Chlamydia muridarum Nigg	Chlamydia trachomatis 434/Bu	Chlamydia trachomatis A/HAR-13	Chlamydia trachomatis B/Jali20/OT	Chlamydia trachomatis B/TZ1A828/OT	Chlamydia trachomatis D-EC	Chlamydia trachomatis D-LC	Chlamydia trachomatis D/UW-3/CX	Chlamydia trachomatis E/11023	Chlamydia trachomatis E/150	Chlamydia trachomatis G/11074	Chlamydia trachomatis G/11222	Chlamydia trachomatis G/9301	Chlamydia trachomatis G/9768	Chlamydia trachomatis L2b/UCH-1/proctitis	Chlamydia trachomatis Sweden2	Chlamydophila abortus S26/3	Chlamydophila caviae GPIC	Chlamydophila felis Fe/C-56	Chlamydophila pneumoniae AR39
OG_00487272	glucosamine--fructose-6-phosphate aminotransferase	1190	98	5	1195	0.927795	COG0449	M		Acholeplasma laidlawii PG-8A	Akkermansia muciniphila ATCC BAA-835	Anaplasma phagocytophilum HZ	Aster yellows witches'-broom phytoplasma AYWB	Borrelia afzelii PKo	Borrelia burgdorferi B31	Borrelia burgdorferi JD1	Borrelia burgdorferi N40	Borrelia burgdorferi ZS7	Borrelia duttonii Ly	Borrelia garinii PBi	Borrelia hermsii DAH	Borrelia recurrentis A1	Borrelia turicatae 91E135	Buchnera aphidicola str. Cc (Cinara cedri)	Candidatus Blochmannia floridanus	Candidatus Blochmannia pennsylvanicus str. BPEN	Candidatus Carsonella ruddii PV	Candidatus Hodgkinia cicadicola Dsem	Candidatus Phytoplasma australiense	Candidatus Phytoplasma mali	Candidatus Sulcia muelleri CARI	Candidatus Sulcia muelleri DMIN	Candidatus Sulcia muelleri GWSS	Candidatus Sulcia muelleri SMDSEM	Candidatus Zinderia insecticola CARI	Clostridiales genomosp. BVAB3 str. UPII9-5	Ehrlichia canis str. Jake	Ehrlichia chaffeensis str. Arkansas	Ehrlichia ruminantium str. Gardel	Ehrlichia ruminantium str. Welgevonden	Ehrlichia ruminantium str. Welgevonden	Mesoplasma florum L1	Mycoplasma agalactiae PG2	Mycoplasma arthritidis 158L3-1	Mycoplasma bovis PG45	Mycoplasma capricolum subsp. capricolum ATCC 27343	Mycoplasma conjunctivae HRC/581	Mycoplasma crocodyli MP145	Mycoplasma fermentans JER
OG_00803071	membrane-associated zinc metalloprotease	1185	103	10	1195	0.927795	COG0750	M		Aster yellows witches'-broom phytoplasma AYWB	Bartonella bacilliformis KC583	Bifidobacterium adolescentis ATCC 15703	Bifidobacterium animalis subsp. lactis AD011	Bifidobacterium animalis subsp. lactis BB-12	Bifidobacterium animalis subsp. lactis Bl-04	Bifidobacterium animalis subsp. lactis DSM 10140	Bifidobacterium animalis subsp. lactis V9	Bifidobacterium bifidum PRL2010	Bifidobacterium bifidum S17	Bifidobacterium dentium Bd1	Bifidobacterium longum DJO10A	Bifidobacterium longum NCC2705	Bifidobacterium longum subsp. infantis ATCC 15697	Bifidobacterium longum subsp. longum BBMN68	Bifidobacterium longum subsp. longum F8	Bifidobacterium longum subsp. longum JDM301	Buchnera aphidicola str. 5A (Acyrthosiphon pisum)	Buchnera aphidicola str. APS (Acyrthosiphon pisum)	Buchnera aphidicola str. Bp (Baizongia pistaciae)	Buchnera aphidicola str. Cc (Cinara cedri)	Buchnera aphidicola str. JF98 (Acyrthosiphon pisum)	Buchnera aphidicola str. JF99 (Acyrthosiphon pisum)	Buchnera aphidicola str. LL01 (Acyrthosiphon pisum)	Buchnera aphidicola str. Sg (Schizaphis graminum)	Buchnera aphidicola str. TLW03 (Acyrthosiphon pisum)	Buchnera aphidicola str. Tuc7 (Acyrthosiphon pisum)	Candidatus Carsonella ruddii PV	Candidatus Hodgkinia cicadicola Dsem	Candidatus Phytoplasma australiense	Candidatus Phytoplasma mali	Candidatus Riesia pediculicola USDA	Candidatus Sulcia muelleri CARI	Candidatus Sulcia muelleri DMIN	Candidatus Sulcia muelleri GWSS	Candidatus Sulcia muelleri SMDSEM	Candidatus Zinderia insecticola CARI	Coprococcus sp. ART55/1	Francisella novicida U112	Francisella philomiragia subsp. philomiragia ATCC 25017
OG_00597137	3-oxoacyl-<acyl-carrier-protein> reductase	1184	104	11	1195	0.927795	COG1028	QR		Anaerococcus prevotii DSM 20548	Arcanobacterium haemolyticum DSM 20595	Aster yellows witches'-broom phytoplasma AYWB	Atopobium parvulum DSM 20469	Bifidobacterium adolescentis ATCC 15703	Bifidobacterium animalis subsp. lactis AD011	Bifidobacterium animalis subsp. lactis BB-12	Bifidobacterium animalis subsp. lactis Bl-04	Bifidobacterium animalis subsp. lactis DSM 10140	Bifidobacterium animalis subsp. lactis V9	Bifidobacterium bifidum PRL2010	Bifidobacterium bifidum S17	Bifidobacterium dentium Bd1	Bifidobacterium longum DJO10A	Bifidobacterium longum NCC2705	Bifidobacterium longum subsp. infantis ATCC 15697	Bifidobacterium longum subsp. longum BBMN68	Bifidobacterium longum subsp. longum F8	Borrelia afzelii PKo	Borrelia burgdorferi B31	Borrelia burgdorferi JD1	Borrelia burgdorferi N40	Borrelia burgdorferi ZS7	Borrelia duttonii Ly	Borrelia garinii PBi	Borrelia hermsii DAH	Borrelia recurrentis A1	Borrelia turicatae 91E135	Candidatus Carsonella ruddii PV	Candidatus Hodgkinia cicadicola Dsem	Candidatus Phytoplasma australiense	Candidatus Phytoplasma mali	Candidatus Sulcia muelleri CARI	Candidatus Sulcia muelleri DMIN	Candidatus Sulcia muelleri GWSS	Candidatus Sulcia muelleri SMDSEM	Candidatus Zinderia insecticola CARI	Corynebacterium aurimucosum ATCC 700975	Corynebacterium diphtheriae NCTC 13129	Corynebacterium efficiens YS-314
OG_00762512	coproporphyrinogen III oxidase	1187	101	6	1193	0.926242	COG0635	H		Anaplasma centrale str. Israel	Anaplasma marginale str. Florida	Anaplasma marginale str. St. Maries	Anaplasma phagocytophilum HZ	Aster yellows witches'-broom phytoplasma AYWB	Blattabacterium sp. (Blattella germanica) str. Bge	Blattabacterium sp. (Periplaneta americana) str. BPLAN	Candidatus Blochmannia floridanus	Candidatus Blochmannia pennsylvanicus str. BPEN	Candidatus Carsonella ruddii PV	Candidatus Desulforudis audaxviator MP104C	Candidatus Hodgkinia cicadicola Dsem	Candidatus Pelagibacter ubique HTCC1062	Candidatus Phytoplasma australiense	Candidatus Phytoplasma mali	Candidatus Riesia pediculicola USDA	Candidatus Ruthia magnifica str. Cm (Calyptogena magnifica)	Candidatus Sulcia muelleri CARI	Candidatus Sulcia muelleri DMIN	Candidatus Sulcia muelleri GWSS	Candidatus Sulcia muelleri SMDSEM	Candidatus Zinderia insecticola CARI	Ehrlichia canis str. Jake	Ehrlichia chaffeensis str. Arkansas	Ehrlichia ruminantium str. Gardel	Ehrlichia ruminantium str. Welgevonden	Ehrlichia ruminantium str. Welgevonden	Lactobacillus acidophilus NCFM	Lactobacillus amylovorus GRL 1112	Lactobacillus brevis ATCC 367	Lactobacillus crispatus ST1	Lactobacillus delbrueckii subsp. bulgaricus ATCC 11842	Lactobacillus delbrueckii subsp. bulgaricus ATCC BAA-365	Lactobacillus delbrueckii subsp. bulgaricus ND02	Lactobacillus fermentum CECT 5716	Lactobacillus fermentum IFO 3956	Lactobacillus gasseri ATCC 33323	Lactobacillus helveticus DPC 4571	Lactobacillus johnsonii FI9785	Lactobacillus johnsonii NCC 533
OG_00586063	CDP-diacylglycerol--glycerol-3-phosphate 3-phosphatidyltransferase	1188	100	4	1192	0.925466	COG0558	I		Acidaminococcus fermentans DSM 20731	Ammonifex degensii KC4	Aster yellows witches'-broom phytoplasma AYWB	Bacteroides fragilis 638R	Bacteroides fragilis NCTC 9343	Bacteroides fragilis YCH46	Bacteroides vulgatus ATCC 8482	Blattabacterium sp. (Blattella germanica) str. Bge	Blattabacterium sp. (Periplaneta americana) str. BPLAN	Buchnera aphidicola str. 5A (Acyrthosiphon pisum)	Buchnera aphidicola str. APS (Acyrthosiphon pisum)	Buchnera aphidicola str. Bp (Baizongia pistaciae)	Buchnera aphidicola str. JF98 (Acyrthosiphon pisum)	Buchnera aphidicola str. JF99 (Acyrthosiphon pisum)	Buchnera aphidicola str. LL01 (Acyrthosiphon pisum)	Buchnera aphidicola str. Sg (Schizaphis graminum)	Buchnera aphidicola str. Tuc7 (Acyrthosiphon pisum)	Candidatus Amoebophilus asiaticus 5a2	Candidatus Azobacteroides pseudotrichonymphae genomovar. CFP2	Candidatus Carsonella ruddii PV	Candidatus Desulforudis audaxviator MP104C	Candidatus Hodgkinia cicadicola Dsem	Candidatus Sulcia muelleri CARI	Candidatus Sulcia muelleri DMIN	Candidatus Sulcia muelleri GWSS	Candidatus Sulcia muelleri SMDSEM	Candidatus Zinderia insecticola CARI	Capnocytophaga ochracea DSM 7271	Carboxydothermus hydrogenoformans Z-2901	Chitinophaga pinensis DSM 2588	Croceibacter atlanticus HTCC2559	Cytophaga hutchinsonii ATCC 33406	Dehalogenimonas lykanthroporepellens BL-DC-9	Deinococcus deserti VCD115	Deinococcus geothermalis DSM 11300	Deinococcus radiodurans R1	Eubacterium cylindroides T2-87	Flavobacteriaceae bacterium 3519-10	Flavobacterium johnsoniae UW101	Flavobacterium psychrophilum JIP02/86
OG_00803677	inosine-5'-monophosphate dehydrogenase	1183	105	9	1192	0.925466	COG0516	F		Aster yellows witches'-broom phytoplasma AYWB	Borrelia hermsii DAH	Borrelia turicatae 91E135	Buchnera aphidicola str. Bp (Baizongia pistaciae)	Buchnera aphidicola str. Cc (Cinara cedri)	Candidatus Amoebophilus asiaticus 5a2	Candidatus Carsonella ruddii PV	Candidatus Hodgkinia cicadicola Dsem	Candidatus Phytoplasma australiense	Candidatus Phytoplasma mali	Candidatus Protochlamydia amoebophila UWE25	Candidatus Sulcia muelleri CARI	Candidatus Sulcia muelleri DMIN	Candidatus Sulcia muelleri GWSS	Candidatus Sulcia muelleri SMDSEM	Candidatus Zinderia insecticola CARI	Chlamydia trachomatis 434/Bu	Chlamydia trachomatis A/HAR-13	Chlamydia trachomatis B/Jali20/OT	Chlamydia trachomatis B/TZ1A828/OT	Chlamydia trachomatis D-EC	Chlamydia trachomatis D-LC	Chlamydia trachomatis D/UW-3/CX	Chlamydia trachomatis E/11023	Chlamydia trachomatis E/150	Chlamydia trachomatis G/11074	Chlamydia trachomatis G/11222	Chlamydia trachomatis G/9301	Chlamydia trachomatis G/9768	Chlamydia trachomatis L2b/UCH-1/proctitis	Chlamydia trachomatis Sweden2	Chlamydophila pneumoniae LPCoLN	Kosmotoga olearia TBF 19.5.1	Mycoplasma agalactiae PG2	Mycoplasma arthritidis 158L3-1	Mycoplasma bovis PG45	Mycoplasma capricolum subsp. capricolum ATCC 27343	Mycoplasma conjunctivae HRC/581	Mycoplasma crocodyli MP145	Mycoplasma fermentans JER
OG_00637411	dihydrodipicolinate synthase	1179	109	9	1188	0.92236	COG0329	EM		Anaerococcus prevotii DSM 20548	Anaplasma phagocytophilum HZ	Arcanobacterium haemolyticum DSM 20595	Aster yellows witches'-broom phytoplasma AYWB	Baumannia cicadellinicola str. Hc (Homalodisca coagulata)	Borrelia afzelii PKo	Borrelia burgdorferi B31	Borrelia burgdorferi JD1	Borrelia burgdorferi N40	Borrelia burgdorferi ZS7	Borrelia duttonii Ly	Borrelia garinii PBi	Borrelia hermsii DAH	Borrelia recurrentis A1	Borrelia turicatae 91E135	Candidatus Hodgkinia cicadicola Dsem	Candidatus Phytoplasma australiense	Candidatus Phytoplasma mali	Candidatus Zinderia insecticola CARI	Clostridiales genomosp. BVAB3 str. UPII9-5	Coprothermobacter proteolyticus DSM 5265	Deinococcus geothermalis DSM 11300	Deinococcus radiodurans R1	Eubacterium cylindroides T2-87	Finegoldia magna ATCC 29328	Francisella tularensis subsp. holarctica FTNF002-00	Francisella tularensis subsp. holarctica LVS	Francisella tularensis subsp. holarctica OSU18	Francisella tularensis subsp. mediasiatica FSC147	Francisella tularensis subsp. tularensis FSC198	Francisella tularensis subsp. tularensis NE061598	Francisella tularensis subsp. tularensis SCHU S4	Francisella tularensis subsp. tularensis WY96-3418	Fusobacterium nucleatum subsp. nucleatum ATCC 25586	Gardnerella vaginalis 409-05	Gardnerella vaginalis ATCC 14019	Lactobacillus brevis ATCC 367	Lactobacillus delbrueckii subsp. bulgaricus ATCC 11842	Lactobacillus delbrueckii subsp. bulgaricus ATCC BAA-365	Lactobacillus gasseri ATCC 33323
OG_00486141	DNA repair protein RadA	1180	108	7	1187	0.921584	COG1066	O		Acholeplasma laidlawii PG-8A	Acidimicrobium ferrooxidans DSM 10331	Acidobacterium capsulatum ATCC 51196	Akkermansia muciniphila ATCC BAA-835	Anaplasma phagocytophilum HZ	Aster yellows witches'-broom phytoplasma AYWB	Atopobium parvulum DSM 20469	Baumannia cicadellinicola str. Hc (Homalodisca coagulata)	Blattabacterium sp. (Blattella germanica) str. Bge	Blattabacterium sp. (Periplaneta americana) str. BPLAN	Borrelia afzelii PKo	Borrelia burgdorferi B31	Borrelia burgdorferi JD1	Borrelia burgdorferi N40	Borrelia burgdorferi ZS7	Borrelia duttonii Ly	Borrelia garinii PBi	Borrelia recurrentis A1	Buchnera aphidicola str. 5A (Acyrthosiphon pisum)	Buchnera aphidicola str. APS (Acyrthosiphon pisum)	Buchnera aphidicola str. Bp (Baizongia pistaciae)	Buchnera aphidicola str. Cc (Cinara cedri)	Buchnera aphidicola str. JF98 (Acyrthosiphon pisum)	Buchnera aphidicola str. JF99 (Acyrthosiphon pisum)	Buchnera aphidicola str. LL01 (Acyrthosiphon pisum)	Buchnera aphidicola str. Sg (Schizaphis graminum)	Buchnera aphidicola str. TLW03 (Acyrthosiphon pisum)	Buchnera aphidicola str. Tuc7 (Acyrthosiphon pisum)	Candidatus Blochmannia floridanus	Candidatus Blochmannia pennsylvanicus str. BPEN	Candidatus Carsonella ruddii PV	Candidatus Hodgkinia cicadicola Dsem	Candidatus Koribacter versatilis Ellin345	Candidatus Pelagibacter ubique HTCC1062	Candidatus Phytoplasma australiense	Candidatus Phytoplasma mali	Candidatus Riesia pediculicola USDA	Candidatus Ruthia magnifica str. Cm (Calyptogena magnifica)	Candidatus Sulcia muelleri CARI	Candidatus Sulcia muelleri DMIN
OG_00136158	glycosyl transferase group 1	1179	109	7	1186	0.920807	COG0317	TK		Anaplasma centrale str. Israel	Anaplasma marginale str. Florida	Anaplasma marginale str. St. Maries	Anaplasma phagocytophilum HZ	Blattabacterium sp. (Blattella germanica) str. Bge	Blattabacterium sp. (Periplaneta americana) str. BPLAN	Brachyspira hyodysenteriae WA1	Brachyspira murdochii DSM 12563	Brachyspira pilosicoli 95/1000	Buchnera aphidicola str. 5A (Acyrthosiphon pisum)	Buchnera aphidicola str. APS (Acyrthosiphon pisum)	Buchnera aphidicola str. Bp (Baizongia pistaciae)	Buchnera aphidicola str. Cc (Cinara cedri)	Buchnera aphidicola str. JF98 (Acyrthosiphon pisum)	Buchnera aphidicola str. JF99 (Acyrthosiphon pisum)	Buchnera aphidicola str. LL01 (Acyrthosiphon pisum)	Buchnera aphidicola str. Sg (Schizaphis graminum)	Buchnera aphidicola str. TLW03 (Acyrthosiphon pisum)	Buchnera aphidicola str. Tuc7 (Acyrthosiphon pisum)	Candidatus Blochmannia floridanus	Candidatus Blochmannia pennsylvanicus str. BPEN	Candidatus Carsonella ruddii PV	Candidatus Hodgkinia cicadicola Dsem	Candidatus Liberibacter asiaticus str. psy62	Candidatus Liberibacter solanacearum CLso-ZC1	Candidatus Protochlamydia amoebophila UWE25	Candidatus Riesia pediculicola USDA	Candidatus Sulcia muelleri CARI	Candidatus Sulcia muelleri DMIN	Candidatus Sulcia muelleri GWSS	Candidatus Sulcia muelleri SMDSEM	Candidatus Zinderia insecticola CARI	Chlamydia muridarum Nigg	Chlamydia trachomatis 434/Bu	Chlamydia trachomatis A/HAR-13	Chlamydia trachomatis B/Jali20/OT	Chlamydia trachomatis B/TZ1A828/OT	Chlamydia trachomatis D-EC	Chlamydia trachomatis D-LC	Chlamydia trachomatis D/UW-3/CX
OG_00763889	ribosome-binding factor A	1183	105	2	1185	0.920031	COG0858	J		Acidithiobacillus ferrooxidans ATCC 23270	Acidithiobacillus ferrooxidans ATCC 53993	Anaplasma centrale str. Israel	Anaplasma marginale str. Florida	Anaplasma marginale str. St. Maries	Anaplasma phagocytophilum HZ	Aquifex aeolicus VF5	Arcobacter butzleri RM4018	Arcobacter nitrofigilis DSM 7299	Buchnera aphidicola str. JF99 (Acyrthosiphon pisum)	Campylobacter concisus 13826	Campylobacter curvus 525.92	Campylobacter fetus subsp. fetus 82-40	Campylobacter hominis ATCC BAA-381	Campylobacter jejuni RM1221	Campylobacter jejuni subsp. doylei 269.97	Campylobacter jejuni subsp. jejuni 81-176	Campylobacter jejuni subsp. jejuni 81116	Campylobacter jejuni subsp. jejuni IA3902	Campylobacter jejuni subsp. jejuni ICDCCJ07001	Campylobacter jejuni subsp. jejuni M1	Campylobacter jejuni subsp. jejuni NCTC 11168	Campylobacter jejuni subsp. jejuni S3	Campylobacter lari RM2100	Candidatus Carsonella ruddii PV	Candidatus Hodgkinia cicadicola Dsem	Candidatus Sulcia muelleri CARI	Candidatus Sulcia muelleri DMIN	Candidatus Sulcia muelleri GWSS	Candidatus Sulcia muelleri SMDSEM	Candidatus Zinderia insecticola CARI	Desulfovibrio desulfuricans subsp. desulfuricans str. ATCC 27774	Desulfovibrio desulfuricans subsp. desulfuricans str. G20	Desulfovibrio magneticus RS-1	Desulfovibrio vulgaris DP4	Desulfovibrio vulgaris RCH1	Desulfovibrio vulgaris str. 'Miyazaki F'	Desulfovibrio vulgaris str. Hildenborough	Ehrlichia canis str. Jake	Ehrlichia chaffeensis str. Arkansas
OG_00085192	acyl carrier protein	1166	122	18	1184	0.919255	COG0236	IQ		Alteromonas macleodii 'Deep ecotype'	Anaplasma centrale str. Israel	Anaplasma marginale str. Florida	Anaplasma marginale str. St. Maries	Anaplasma phagocytophilum HZ	Arcanobacterium haemolyticum DSM 20595	Bifidobacterium adolescentis ATCC 15703	Bifidobacterium animalis subsp. lactis AD011	Bifidobacterium animalis subsp. lactis BB-12	Bifidobacterium animalis subsp. lactis Bl-04	Bifidobacterium animalis subsp. lactis DSM 10140	Bifidobacterium animalis subsp. lactis V9	Bifidobacterium bifidum PRL2010	Bifidobacterium bifidum S17	Bifidobacterium dentium Bd1	Bifidobacterium longum DJO10A	Bifidobacterium longum NCC2705	Bifidobacterium longum subsp. infantis ATCC 15697	Bifidobacterium longum subsp. longum BBMN68	Bifidobacterium longum subsp. longum F8	Bifidobacterium longum subsp. longum JDM301	Buchnera aphidicola str. Cc (Cinara cedri)	Candidatus Carsonella ruddii PV	Candidatus Hodgkinia cicadicola Dsem	Candidatus Sulcia muelleri SMDSEM	Candidatus Zinderia insecticola CARI	Coprococcus catus GD/7	Coprococcus sp. ART55/1	Corynebacterium aurimucosum ATCC 700975	Corynebacterium diphtheriae NCTC 13129	Corynebacterium kroppenstedtii DSM 44385	Corynebacterium pseudotuberculosis 1002	Corynebacterium pseudotuberculosis C231	Corynebacterium pseudotuberculosis FRC41	Corynebacterium pseudotuberculosis I19	Cryptobacterium curtum DSM 15641	Eggerthella lenta DSM 2243	Ehrlichia canis str. Jake	Ehrlichia chaffeensis str. Arkansas	Ehrlichia ruminantium str. Gardel
OG_00701205	cell divisionFtsK/SpoIIIE	1160	128	17	1177	0.91382	COG1674	D		'Nostoc azollae' 0708	Acaryochloris marina MBIC11017	Aquifex aeolicus VF5	Arthrospira platensis NIES-39	Aster yellows witches'-broom phytoplasma AYWB	Buchnera aphidicola str. 5A (Acyrthosiphon pisum)	Buchnera aphidicola str. APS (Acyrthosiphon pisum)	Buchnera aphidicola str. Bp (Baizongia pistaciae)	Buchnera aphidicola str. Cc (Cinara cedri)	Buchnera aphidicola str. JF98 (Acyrthosiphon pisum)	Buchnera aphidicola str. JF99 (Acyrthosiphon pisum)	Buchnera aphidicola str. LL01 (Acyrthosiphon pisum)	Buchnera aphidicola str. Sg (Schizaphis graminum)	Buchnera aphidicola str. TLW03 (Acyrthosiphon pisum)	Buchnera aphidicola str. Tuc7 (Acyrthosiphon pisum)	Candidatus Carsonella ruddii PV	Candidatus Hodgkinia cicadicola Dsem	Candidatus Phytoplasma australiense	Candidatus Phytoplasma mali	Candidatus Riesia pediculicola USDA	Candidatus Sulcia muelleri CARI	Candidatus Sulcia muelleri DMIN	Candidatus Sulcia muelleri GWSS	Candidatus Zinderia insecticola CARI	Cyanothece sp. ATCC 51142	Cyanothece sp. PCC 7424	Cyanothece sp. PCC 7425	Cyanothece sp. PCC 7822	Cyanothece sp. PCC 8801	Cyanothece sp. PCC 8802	Fervidobacterium nodosum Rt17-B1	Fusobacterium nucleatum subsp. nucleatum ATCC 25586	Gloeobacter violaceus PCC 7421	Hydrogenobacter thermophilus TK-6	Hydrogenobacter thermophilus TK-6	Hydrogenobaculum sp. Y04AAS1	Ilyobacter polytropus DSM 2926	Kosmotoga olearia TBF 19.5.1	Megamonas hypermegale	Mycoplasma agalactiae PG2
OG_00801347	phosphomethylpyrimidine kinase	1175	113	0	1175	0.912267	COG2201	NT		Aster yellows witches'-broom phytoplasma AYWB	Borrelia afzelii PKo	Borrelia burgdorferi B31	Borrelia burgdorferi JD1	Borrelia burgdorferi N40	Borrelia burgdorferi ZS7	Borrelia garinii PBi	Borrelia hermsii DAH	Borrelia recurrentis A1	Borrelia turicatae 91E135	Buchnera aphidicola str. 5A (Acyrthosiphon pisum)	Buchnera aphidicola str. APS (Acyrthosiphon pisum)	Buchnera aphidicola str. Bp (Baizongia pistaciae)	Buchnera aphidicola str. Cc (Cinara cedri)	Buchnera aphidicola str. JF98 (Acyrthosiphon pisum)	Buchnera aphidicola str. JF99 (Acyrthosiphon pisum)	Buchnera aphidicola str. LL01 (Acyrthosiphon pisum)	Buchnera aphidicola str. Sg (Schizaphis graminum)	Buchnera aphidicola str. TLW03 (Acyrthosiphon pisum)	Buchnera aphidicola str. Tuc7 (Acyrthosiphon pisum)	Candidatus Amoebophilus asiaticus 5a2	Candidatus Blochmannia floridanus	Candidatus Blochmannia pennsylvanicus str. BPEN	Candidatus Carsonella ruddii PV	Candidatus Hamiltonella defensa 5AT (Acyrthosiphon pisum)	Candidatus Hodgkinia cicadicola Dsem	Candidatus Liberibacter asiaticus str. psy62	Candidatus Liberibacter solanacearum CLso-ZC1	Candidatus Phytoplasma australiense	Candidatus Phytoplasma mali	Candidatus Riesia pediculicola USDA	Candidatus Sulcia muelleri CARI	Candidatus Sulcia muelleri DMIN	Candidatus Sulcia muelleri GWSS	Candidatus Sulcia muelleri SMDSEM	Candidatus Zinderia insecticola CARI	Chlamydia muridarum Nigg	Chlamydia trachomatis 434/Bu	Chlamydia trachomatis A/HAR-13	Chlamydia trachomatis B/Jali20/OT
OG_00776156	Poly<A> polymerase	1165	123	10	1175	0.912267	COG0617	J		Campylobacter concisus 13826	Campylobacter curvus 525.92	Campylobacter fetus subsp. fetus 82-40	Campylobacter hominis ATCC BAA-381	Campylobacter jejuni RM1221	Campylobacter jejuni subsp. doylei 269.97	Campylobacter jejuni subsp. jejuni 81-176	Campylobacter jejuni subsp. jejuni 81116	Campylobacter jejuni subsp. jejuni IA3902	Campylobacter jejuni subsp. jejuni ICDCCJ07001	Campylobacter jejuni subsp. jejuni M1	Campylobacter jejuni subsp. jejuni NCTC 11168	Campylobacter jejuni subsp. jejuni S3	Campylobacter lari RM2100	Candidatus Carsonella ruddii PV	Candidatus Hodgkinia cicadicola Dsem	Candidatus Zinderia insecticola CARI	Clostridiales genomosp. BVAB3 str. UPII9-5	Clostridium tetani E88	Coprothermobacter proteolyticus DSM 5265	Desulfotomaculum reducens MI-1	Fervidobacterium nodosum Rt17-B1	Finegoldia magna ATCC 29328	Halanaerobium praevalens DSM 2228	Halanaerobium sp. 'sapolanicus'	Heliobacterium modesticaldum Ice1	Kosmotoga olearia TBF 19.5.1	Lawsonia intracellularis PHE/MN1-00	Mesoplasma florum L1	Mycoplasma agalactiae PG2	Mycoplasma arthritidis 158L3-1	Mycoplasma bovis PG45	Mycoplasma capricolum subsp. capricolum ATCC 27343	Mycoplasma conjunctivae HRC/581	Mycoplasma crocodyli MP145	Mycoplasma fermentans JER	Mycoplasma fermentans PG18	Mycoplasma gallisepticum str. F	Mycoplasma gallisepticum str. R(high)	Mycoplasma gallisepticum str. R(low)
OG_00763113	geranyltranstransferase	1168	120	6	1174	0.911491	COG0142	H		Aster yellows witches'-broom phytoplasma AYWB	Bacteriovorax marinus SJ	Blattabacterium sp. (Blattella germanica) str. Bge	Blattabacterium sp. (Periplaneta americana) str. BPLAN	Buchnera aphidicola str. Bp (Baizongia pistaciae)	Buchnera aphidicola str. Cc (Cinara cedri)	Candidatus Amoebophilus asiaticus 5a2	Candidatus Blochmannia floridanus	Candidatus Carsonella ruddii PV	Candidatus Hodgkinia cicadicola Dsem	Candidatus Phytoplasma australiense	Candidatus Phytoplasma mali	Candidatus Sulcia muelleri CARI	Candidatus Sulcia muelleri DMIN	Candidatus Sulcia muelleri GWSS	Candidatus Sulcia muelleri SMDSEM	Candidatus Zinderia insecticola CARI	Chlamydia muridarum Nigg	Chlamydia trachomatis 434/Bu	Chlamydia trachomatis A/HAR-13	Chlamydia trachomatis B/Jali20/OT	Chlamydia trachomatis B/TZ1A828/OT	Chlamydia trachomatis D-EC	Chlamydia trachomatis D-LC	Chlamydia trachomatis D/UW-3/CX	Chlamydia trachomatis E/11023	Chlamydia trachomatis E/150	Chlamydia trachomatis G/11074	Chlamydia trachomatis G/11222	Chlamydia trachomatis G/9301	Chlamydia trachomatis G/9768	Chlamydia trachomatis L2b/UCH-1/proctitis	Chlamydia trachomatis Sweden2	Coprothermobacter proteolyticus DSM 5265	Dehalococcoides ethenogenes 195	Dehalococcoides sp. BAV1	Dehalococcoides sp. CBDB1	Dehalococcoides sp. GT	Dehalococcoides sp. VS	Deinococcus deserti VCD115
OG_00497785	gamma-glutamyl phosphate reductase	1173	115	0	1173	0.910714	COG0665	E		Acholeplasma laidlawii PG-8A	Anaplasma centrale str. Israel	Anaplasma marginale str. Florida	Anaplasma marginale str. St. Maries	Anaplasma phagocytophilum HZ	Aster yellows witches'-broom phytoplasma AYWB	Atopobium parvulum DSM 20469	Blattabacterium sp. (Blattella germanica) str. Bge	Blattabacterium sp. (Periplaneta americana) str. BPLAN	Borrelia afzelii PKo	Borrelia burgdorferi B31	Borrelia burgdorferi JD1	Borrelia burgdorferi N40	Borrelia burgdorferi ZS7	Borrelia duttonii Ly	Borrelia garinii PBi	Borrelia hermsii DAH	Borrelia recurrentis A1	Borrelia turicatae 91E135	Buchnera aphidicola str. Bp (Baizongia pistaciae)	Buchnera aphidicola str. Cc (Cinara cedri)	Buchnera aphidicola str. Sg (Schizaphis graminum)	Campylobacter jejuni subsp. doylei 269.97	Campylobacter lari RM2100	Candidatus Amoebophilus asiaticus 5a2	Candidatus Carsonella ruddii PV	Candidatus Hodgkinia cicadicola Dsem	Candidatus Liberibacter asiaticus str. psy62	Candidatus Liberibacter solanacearum CLso-ZC1	Candidatus Phytoplasma australiense	Candidatus Phytoplasma mali	Candidatus Riesia pediculicola USDA	Candidatus Sulcia muelleri CARI	Candidatus Sulcia muelleri DMIN	Candidatus Sulcia muelleri GWSS	Candidatus Sulcia muelleri SMDSEM	Candidatus Zinderia insecticola CARI	Clostridiales genomosp. BVAB3 str. UPII9-5	Ehrlichia canis str. Jake	Ehrlichia chaffeensis str. Arkansas
OG_00499205	pyruvate kinase	1169	119	1	1170	0.908385	COG0469	G		Acinetobacter baumannii AB0057	Acinetobacter baumannii AB307-0294	Acinetobacter baumannii ACICU	Acinetobacter baumannii ATCC 17978	Acinetobacter baumannii AYE	Acinetobacter baumannii SDF	Acinetobacter baylyi ADP1	Acinetobacter calcoaceticus PHEA-2	Acinetobacter sp. DR1	Anaplasma centrale str. Israel	Anaplasma marginale str. Florida	Anaplasma marginale str. St. Maries	Anaplasma phagocytophilum HZ	Aquifex aeolicus VF5	Bartonella bacilliformis KC583	Blattabacterium sp. (Blattella germanica) str. Bge	Blattabacterium sp. (Periplaneta americana) str. BPLAN	Candidatus Azobacteroides pseudotrichonymphae genomovar. CFP2	Candidatus Carsonella ruddii PV	Candidatus Hodgkinia cicadicola Dsem	Candidatus Pelagibacter ubique HTCC1062	Candidatus Phytoplasma mali	Candidatus Sulcia muelleri CARI	Candidatus Sulcia muelleri DMIN	Candidatus Sulcia muelleri GWSS	Candidatus Sulcia muelleri SMDSEM	Candidatus Zinderia insecticola CARI	Chlorobaculum parvum NCIB 8327	Chlorobium chlorochromatii CaD3	Chlorobium limicola DSM 245	Chlorobium luteolum DSM 273	Chlorobium phaeobacteroides BS1	Chlorobium phaeobacteroides DSM 266	Chlorobium phaeovibrioides DSM 265	Chlorobium tepidum TLS	Clostridium thermocellum ATCC 27405	Clostridium thermocellum DSM 1313	Cryptobacterium curtum DSM 15641	Ehrlichia canis str. Jake	Ehrlichia chaffeensis str. Arkansas
OG_00802794	F0F1 ATP synthase subunit epsilon	1162	126	1	1163	0.90295	COG0355	C		Acholeplasma laidlawii PG-8A	Acidimicrobium ferrooxidans DSM 10331	Alistipes shahii WAL 8301	Aminobacterium colombiense DSM 12261	Anaerococcus prevotii DSM 20548	Aster yellows witches'-broom phytoplasma AYWB	Borrelia afzelii PKo	Borrelia burgdorferi B31	Borrelia burgdorferi JD1	Borrelia burgdorferi N40	Borrelia burgdorferi ZS7	Borrelia duttonii Ly	Borrelia garinii PBi	Borrelia hermsii DAH	Borrelia recurrentis A1	Borrelia turicatae 91E135	Brachyspira hyodysenteriae WA1	Brachyspira murdochii DSM 12563	Brachyspira pilosicoli 95/1000	Buchnera aphidicola str. Cc (Cinara cedri)	Candidatus Carsonella ruddii PV	Candidatus Hodgkinia cicadicola Dsem	Candidatus Phytoplasma australiense	Candidatus Phytoplasma mali	Candidatus Riesia pediculicola USDA	Candidatus Sulcia muelleri CARI	Candidatus Sulcia muelleri DMIN	Candidatus Sulcia muelleri GWSS	Candidatus Sulcia muelleri SMDSEM	Candidatus Zinderia insecticola CARI	Chlamydia muridarum Nigg	Chlamydia trachomatis 434/Bu	Chlamydia trachomatis A/HAR-13	Chlamydia trachomatis B/Jali20/OT	Chlamydia trachomatis B/TZ1A828/OT	Chlamydia trachomatis D-EC	Chlamydia trachomatis D-LC	Chlamydia trachomatis D/UW-3/CX	Chlamydia trachomatis E/11023	Chlamydia trachomatis E/150
[truncated: 85 more columns]

## Sheet: genomes missing core OG-by name
	Total:	9039	2382
	Percentage of OG for which a good hit was found (PROMER):		0.263525
		missing core OGs	found good hits in sequence	could not find a
xBASE genome_id	genome name	(based on annotation)	(six-frame PROMER)	good PROMER hit	List of OGs with no xBASE orthologue and no good PROMER hit
16628	Acaryochloris marina MBIC11017	2	1	1	OG_00701205
16629	Acetobacter pasteurianus IFO 3283-01	1	1	0
19738	Acetobacter pasteurianus IFO 3283-01-42C	1	1	0
19739	Acetobacter pasteurianus IFO 3283-03	1	1	0
19740	Acetobacter pasteurianus IFO 3283-07	1	1	0
19741	Acetobacter pasteurianus IFO 3283-12	1	1	0
19742	Acetobacter pasteurianus IFO 3283-22	1	1	0
19743	Acetobacter pasteurianus IFO 3283-26	1	1	0
19744	Acetobacter pasteurianus IFO 3283-32	1	1	0
19745	Acetohalobium arabaticum DSM 5501	2	1	1	OG_00802962
16630	Acholeplasma laidlawii PG-8A	19	1	18	OG_00006771	OG_00342722	OG_00485948	OG_00486087	OG_00486141	OG_00486366	OG_00486423	OG_00487008	OG_00487020	OG_00487272	OG_00497785	OG_00802794	OG_00803249	OG_00803677	OG_00803686	OG_00803966	OG_00804224	OG_00844379
19746	Achromobacter xylosoxidans A8	2	1	1	OG_00279053
16631	Acidaminococcus fermentans DSM 20731	3	2	1	OG_00586063
16632	Acidimicrobium ferrooxidans DSM 10331	5	1	4	OG_00120492	OG_00486141	OG_00802794	OG_00828057
16633	Acidiphilium cryptum JF-5	1	1	0
16634	Acidithiobacillus ferrooxidans ATCC 23270	2	0	2	OG_00701205	OG_00763889
16635	Acidithiobacillus ferrooxidans ATCC 53993	1	0	1	OG_00763889
16636	Acidobacterium capsulatum ATCC 51196	1	0	1	OG_00486141
16637	Acidothermus cellulolyticus 11B	2	1	1	OG_00763113
16638	Acidovorax citrulli AAC00-1	1	1	0
16955	Acidovorax ebreus TPSY	1	1	0
16639	Acidovorax sp. JS42	1	1	0
16640	Acinetobacter baumannii AB0057	1	0	1	OG_00499205
16641	Acinetobacter baumannii AB307-0294	5	3	2	OG_00487008	OG_00499205
16642	Acinetobacter baumannii ACICU	1	0	1	OG_00499205
16643	Acinetobacter baumannii ATCC 17978	7	4	3	OG_00483928	OG_00499205	OG_00871557
16644	Acinetobacter baumannii AYE	1	0	1	OG_00499205
16645	Acinetobacter baumannii SDF	3	1	2	OG_00485818	OG_00499205
16646	Acinetobacter baylyi ADP1	1	0	1	OG_00499205
20795	Acinetobacter calcoaceticus PHEA-2	1	0	1	OG_00499205
19749	Acinetobacter sp. DR1	2	1	1	OG_00499205
16648	Actinobacillus pleuropneumoniae serovar 3 str. JL03	4	3	1	OG_00687521
16647	Actinobacillus pleuropneumoniae serovar 5b str. L20	2	2	0
16653	Aeromonas salmonicida subsp. salmonicida A449	1	1	0
19750	Aggregatibacter actinomycetemcomitans D11S-1	3	3	0
16656	Aggregatibacter aphrophilus NJ8700	2	2	0
16657	Agrobacterium radiobacter K84	6	6	0
16658	Agrobacterium tumefaciens str. C58	6	6	0
16659	Agrobacterium vitis S4	6	6	0
16660	Akkermansia muciniphila ATCC BAA-835	5	0	5	OG_00279053	OG_00486141	OG_00487272	OG_00636131	OG_00779047
16662	Alicyclobacillus acidocaldarius subsp. acidocaldarius DSM 446	1	0	1	OG_00743491
16663	Aliivibrio salmonicida LFI1238	2	2	0
19751	Alistipes shahii WAL 8301	37	27	10	OG_00095538	OG_00485818	OG_00485987	OG_00486225	OG_00487149	OG_00586063	OG_00778648	OG_00802794	OG_00804278	OG_00871589
16665	Alkaliphilus metalliredigens QYMF	6	5	1	OG_00605287
16666	Alkaliphilus oremlandii OhILAs	8	6	2	OG_00372429	OG_00802543
16667	Alteromonas macleodii 'Deep ecotype'	5	0	5	OG_00085192	OG_00474144	OG_00586063	OG_00764224	OG_00779674
19753	Aminobacterium colombiense DSM 12261	9	0	9	OG_00279053	OG_00483928	OG_00485987	OG_00487145	OG_00487149	OG_00605287	OG_00778648	OG_00802794	OG_00871589
16668	Ammonifex degensii KC4	7	3	4	OG_00586063	OG_00687521	OG_00743491	OG_00804286
16671	Anaerococcus prevotii DSM 20548	16	4	12	OG_00485987	OG_00487149	OG_00597137	OG_00637411	OG_00721630	OG_00732074	OG_00776156	OG_00778584	OG_00778648	OG_00802543	OG_00802794	OG_00871589
16672	Anaeromyxobacter dehalogenans 2CP-1	3	1	2	OG_00486357	OG_00802962
16673	Anaeromyxobacter dehalogenans 2CP-C	2	0	2	OG_00486357	OG_00802962
16674	Anaeromyxobacter sp. Fw109-5	2	0	2	OG_00486357	OG_00802962
16675	Anaeromyxobacter sp. K	4	2	2	OG_00486357	OG_00802962
16676	Anaplasma centrale str. Israel	10	0	10	OG_00084366	OG_00085192	OG_00136158	OG_00372429	OG_00486197	OG_00497785	OG_00499205	OG_00636131	OG_00762512	OG_00763889
16677	Anaplasma marginale str. Florida	10	0	10	OG_00084366	OG_00085192	OG_00136158	OG_00372429	OG_00486197	OG_00497785	OG_00499205	OG_00636131	OG_00762512	OG_00763889
16678	Anaplasma marginale str. St. Maries	10	0	10	OG_00084366	OG_00085192	OG_00136158	OG_00372429	OG_00486197	OG_00497785	OG_00499205	OG_00636131	OG_00762512	OG_00763889
16679	Anaplasma phagocytophilum HZ	21	0	21	OG_00084366	OG_00085192	OG_00136158	OG_00342722	OG_00372429	OG_00485948	OG_00486087	OG_00486141	OG_00486197	OG_00486423	OG_00487008	OG_00487272	OG_00497785	OG_00499205	OG_00499434	OG_00636131	OG_00637411	OG_00732074	OG_00762512	OG_00763889	OG_00803966
16681	Aquifex aeolicus VF5	8	0	8	OG_00084320	OG_00372429	OG_00486028	OG_00486409	OG_00499205	OG_00687521	OG_00701205	OG_00763889
19756	Arcanobacterium haemolyticum DSM 20595	9	1	8	OG_00085192	OG_00120621	OG_00597137	OG_00605287	OG_00637411	OG_00732074	OG_00802543	OG_00803265
16684	Arcobacter butzleri RM4018	2	0	2	OG_00486269	OG_00763889
19757	Arcobacter nitrofigilis DSM 7299	2	0	2	OG_00486269	OG_00763889
16685	Aromatoleum aromaticum EbN1	1	1	0
19758	Arthrobacter arilaitensis Re117	2	1	1	OG_00804224
16686	Arthrobacter aurescens TC1	4	3	1	OG_00804224
16687	Arthrobacter chlorophenolicus A6	2	1	1	OG_00804224
16688	Arthrobacter sp. FB24	2	1	1	OG_00804224
19759	Arthrospira platensis NIES-39	2	1	1	OG_00701205
16689	Aster yellows witches'-broom phytoplasma AYWB	50	0	50	OG_00006771	OG_00084320	OG_00309120	OG_00342722	OG_00483928	OG_00485948	OG_00485987	OG_00486087	OG_00486136	OG_00486141	OG_00486366	OG_00486409	OG_00486423	OG_00486637	OG_00486694	OG_00487008	OG_00487020	OG_00487083	OG_00487145	OG_00487149	OG_00487174	OG_00487272	OG_00497785	OG_00499434	OG_00586063	OG_00597137	OG_00605287	OG_00637411	OG_00687521	OG_00700773	OG_00701205	OG_00721630	OG_00732074	OG_00762512	OG_00763113	OG_00778584	OG_00778648	OG_00801347	OG_00802510	OG_00802794	OG_00803071	OG_00803249	OG_00803677	OG_00803686	OG_00803966
16690	Atopobium parvulum DSM 20469	7	1	6	OG_00120492	OG_00486141	OG_00497785	OG_00597137	OG_00778584	OG_00871498
16691	Azoarcus sp. BH72	1	1	0
16692	Azorhizobium caulinodans ORS 571	6	6	0
16696	Bacillus anthracis str. A0248	1	1	0
16695	Bacillus anthracis str. 'Ames Ancestor'	4	4	0
16702	Bacillus cereus AH820	1	1	0
16704	Bacillus cereus ATCC 14579	3	1	2	OG_00486996	OG_00803071
16708	Bacillus cereus Q1	2	2	0
16711	Bacillus halodurans C-125	1	0	1	OG_00743491
16714	Bacillus pumilus SAFR-032	3	2	1	OG_00486482
19769	Bacillus selenitireducens MLS10	2	1	1	OG_00743491
19770	Bacillus subtilis subsp. natto BEST195	4	4	0
19772	Bacillus thuringiensis BMB171	5	5	0
16717	Bacillus thuringiensis str. Al Hakam	1	1	0
19774	Bacteriovorax marinus SJ	6	0	6	OG_00486269	OG_00487321	OG_00636131	OG_00763113	OG_00871557	OG_00871666
19775	Bacteroides fragilis 638R	3	2	1	OG_00586063
16719	Bacteroides fragilis NCTC 9343	4	2	2	OG_00487272	OG_00586063
16720	Bacteroides fragilis YCH46	3	2	1	OG_00586063
16721	Bacteroides thetaiotaomicron VPI-5482	3	2	1	OG_00586063
16722	Bacteroides vulgatus ATCC 8482	5	4	1	OG_00586063
19776	Bacteroides xylanisolvens XB1A	16	14	2	OG_00586063	OG_00795347
16723	Bartonella bacilliformis KC583	9	5	4	OG_00499205	OG_00499434	OG_00743491	OG_00803071
16724	Bartonella grahamii as4aup	8	6	2	OG_00499434	OG_00743491
16725	Bartonella henselae str. Houston-1	7	5	2	OG_00499434	OG_00743491
16726	Bartonella quintana str. Toulouse	8	5	3	OG_00499205	OG_00499434	OG_00743491
16727	Bartonella tribocorum CIP 105476	7	5	2	OG_00499434	OG_00743491
16728	Baumannia cicadellinicola str. Hc (Homalodisca coagulata)	16	2	14	OG_00084366	OG_00136158	OG_00379159	OG_00486028	OG_00486141	OG_00487145	OG_00636131	OG_00637411	OG_00732074	OG_00743491	OG_00778584	OG_00802676	OG_00803265	OG_00804133
16729	Bdellovibrio bacteriovorus HD100	4	0	4	OG_00601994	OG_00777384	OG_00802959	OG_00871557
16730	Beijerinckia indica subsp. indica ATCC 9039	5	5	0
16731	Beutenbergia cavernae DSM 12333	1	1	0
16732	Bifidobacterium adolescentis ATCC 15703	12	6	6	OG_00085192	OG_00120621	OG_00597137	OG_00605287	OG_00803071	OG_00871557
16733	Bifidobacterium animalis subsp. lactis AD011	10	3	7	OG_00085192	OG_00120621	OG_00597137	OG_00605287	OG_00803071	OG_00871498	OG_00871557
19777	Bifidobacterium animalis subsp. lactis BB-12	9	2	7	OG_00085192	OG_00120621	OG_00597137	OG_00605287	OG_00803071	OG_00871498	OG_00871557
16734	Bifidobacterium animalis subsp. lactis Bl-04	8	1	7	OG_00085192	OG_00120621	OG_00597137	OG_00605287	OG_00803071	OG_00871498	OG_00871557
16735	Bifidobacterium animalis subsp. lactis DSM 10140	8	1	7	OG_00085192	OG_00120621	OG_00597137	OG_00605287	OG_00803071	OG_00871498	OG_00871557
19778	Bifidobacterium animalis subsp. lactis V9	8	1	7	OG_00085192	OG_00120621	OG_00597137	OG_00605287	OG_00803071	OG_00871498	OG_00871557
19779	Bifidobacterium bifidum PRL2010	9	2	7	OG_00085192	OG_00120621	OG_00597137	OG_00605287	OG_00803071	OG_00871498	OG_00871557
19780	Bifidobacterium bifidum S17	9	2	7	OG_00085192	OG_00120621	OG_00597137	OG_00605287	OG_00803071	OG_00871498	OG_00871557
16736	Bifidobacterium dentium Bd1	7	1	6	OG_00085192	OG_00120621	OG_00597137	OG_00605287	OG_00803071	OG_00871557
16737	Bifidobacterium longum DJO10A	8	2	6	OG_00085192	OG_00120621	OG_00597137	OG_00605287	OG_00803071	OG_00871557
16738	Bifidobacterium longum NCC2705	8	2	6	OG_00085192	OG_00120621	OG_00597137	OG_00605287	OG_00803071	OG_00871557
16739	Bifidobacterium longum subsp. infantis ATCC 15697	8	2	6	OG_00085192	OG_00120621	OG_00597137	OG_00605287	OG_00803071	OG_00871557
19781	Bifidobacterium longum subsp. longum BBMN68	9	2	7	OG_00085192	OG_00120621	OG_00237963	OG_00597137	OG_00605287	OG_00803071	OG_00871557
19782	Bifidobacterium longum subsp. longum F8	47	40	7	OG_00085192	OG_00120621	OG_00597137	OG_00605287	OG_00802962	OG_00803071	OG_00871557
19783	Bifidobacterium longum subsp. longum JDM301	8	2	6	OG_00085192	OG_00120621	OG_00597137	OG_00605287	OG_00803071	OG_00871557
16740	Blattabacterium sp. (Blattella germanica) str. Bge	18	0	18	OG_00136158	OG_00309120	OG_00372429	OG_00379159	OG_00486028	OG_00486141	OG_00497785	OG_00499205	OG_00586063	OG_00762512	OG_00763113	OG_00764224	OG_00778584	OG_00802676	OG_00803265	OG_00804133	OG_00828057	OG_00871498
16741	Blattabacterium sp. (Periplaneta americana) str. BPLAN	18	0	18	OG_00136158	OG_00309120	OG_00372429	OG_00379159	OG_00486028	OG_00486141	OG_00497785	OG_00499205	OG_00586063	OG_00762512	OG_00763113	OG_00764224	OG_00778584	OG_00802676	OG_00803265	OG_00804133	OG_00828057	OG_00871498
16742	Bordetella avium 197N	2	2	0
16743	Bordetella bronchiseptica RB50	2	1	1	OG_00279053
16744	Bordetella parapertussis 12822	2	2	0
16745	Bordetella pertussis Tohama I	2	2	0
16746	Bordetella petrii DSM 12804	2	2	0
19784	Borrelia afzelii PKo	20	0	20	OG_00084366	OG_00483928	OG_00485987	OG_00486136	OG_00486141	OG_00487043	OG_00487149	OG_00487272	OG_00497785	OG_00597137	OG_00601994	OG_00637411	OG_00732074	OG_00778648	OG_00801347	OG_00802794	OG_00804133	OG_00871557	OG_00871578	OG_00871589
16748	Borrelia burgdorferi B31	20	0	20	OG_00084366	OG_00483928	OG_00485987	OG_00486136	OG_00486141	OG_00487043	OG_00487149	OG_00487272	OG_00497785	OG_00597137	OG_00601994	OG_00637411	OG_00732074	OG_00778648	OG_00801347	OG_00802794	OG_00804133	OG_00871557	OG_00871578	OG_00871589
19785	Borrelia burgdorferi JD1	20	0	20	OG_00084366	OG_00483928	OG_00485987	OG_00486136	OG_00486141	OG_00487043	OG_00487149	OG_00487272	OG_00497785	OG_00597137	OG_00601994	OG_00637411	OG_00732074	OG_00778648	OG_00801347	OG_00802794	OG_00804133	OG_00871557	OG_00871578	OG_00871589
19786	Borrelia burgdorferi N40	20	0	20	OG_00084366	OG_00483928	OG_00485987	OG_00486136	OG_00486141	OG_00487043	OG_00487149	OG_00487272	OG_00497785	OG_00597137	OG_00601994	OG_00637411	OG_00732074	OG_00778648	OG_00801347	OG_00802794	OG_00804133	OG_00871557	OG_00871578	OG_00871589
16749	Borrelia burgdorferi ZS7	22	1	21	OG_00084366	OG_00483928	OG_00485987	OG_00486136	OG_00486141	OG_00487043	OG_00487149	OG_00487272	OG_00497785	OG_00597137	OG_00601994	OG_00637411	OG_00732074	OG_00764224	OG_00778648	OG_00801347	OG_00802794	OG_00804133	OG_00871557	OG_00871578	OG_00871589
16750	Borrelia duttonii Ly	19	0	19	OG_00084366	OG_00483928	OG_00485987	OG_00486136	OG_00486141	OG_00487043	OG_00487149	OG_00487272	OG_00497785	OG_00597137	OG_00601994	OG_00637411	OG_00732074	OG_00778648	OG_00801347	OG_00802794	OG_00871557	OG_00871578	OG_00871589
18608	Borrelia garinii PBi	20	0	20	OG_00084366	OG_00483928	OG_00485987	OG_00486136	OG_00486141	OG_00487043	OG_00487149	OG_00487272	OG_00497785	OG_00597137	OG_00601994	OG_00637411	OG_00732074	OG_00778648	OG_00801347	OG_00802794	OG_00804133	OG_00871557	OG_00871578	OG_00871589
19787	Borrelia hermsii DAH	20	0	20	OG_00084366	OG_00483928	OG_00485987	OG_00486136	OG_00487043	OG_00487149	OG_00487272	OG_00497785	OG_00597137	OG_00601994	OG_00637411	OG_00732074	OG_00778648	OG_00801347	OG_00802794	OG_00803249	OG_00803677	OG_00871557	OG_00871578	OG_00871589
16753	Borrelia recurrentis A1	20	1	19	OG_00084366	OG_00483928	OG_00485987	OG_00486136	OG_00486141	OG_00487043	OG_00487149	OG_00487272	OG_00497785	OG_00597137	OG_00601994	OG_00637411	OG_00732074	OG_00778648	OG_00801347	OG_00802794	OG_00871557	OG_00871578	OG_00871589
16754	Borrelia turicatae 91E135	20	0	20	OG_00084366	OG_00483928	OG_00485987	OG_00486136	OG_00487043	OG_00487149	OG_00487272	OG_00497785	OG_00597137	OG_00601994	OG_00637411	OG_00732074	OG_00778648	OG_00801347	OG_00802794	OG_00803249	OG_00803677	OG_00871557	OG_00871578	OG_00871589
16755	Brachybacterium faecium DSM 4810	5	2	3	OG_00120492	OG_00486141	OG_00605287
16756	Brachyspira hyodysenteriae WA1	8	1	7	OG_00120492	OG_00136158	OG_00779047	OG_00802794	OG_00802959	OG_00802986	OG_00871557
19788	Brachyspira murdochii DSM 12563	6	0	6	OG_00120492	OG_00136158	OG_00779047	OG_00802794	OG_00802986	OG_00871557
19789	Brachyspira pilosicoli 95/1000	7	1	6	OG_00120492	OG_00136158	OG_00779047	OG_00802794	OG_00802986	OG_00871557
16757	Bradyrhizobium japonicum USDA 110	5	5	0
16758	Bradyrhizobium sp. BTAi1	6	5	1	OG_00486238
16759	Bradyrhizobium sp. ORS278	5	5	0
16762	Brucella abortus bv. 1 str. 9-941	5	5	0
16761	Brucella abortus S19	5	5	0
16763	Brucella canis ATCC 23365	6	6	0
16764	Brucella melitensis ATCC 23457	5	5	0
16765	Brucella melitensis biovar Abortus 2308	6	6	0
16766	Brucella melitensis bv. 1 str. 16M	5	5	0
16767	Brucella microti CCM 4915	5	5	0
16768	Brucella ovis ATCC 25840	5	5	0
16769	Brucella suis 1330	5	5	0
16770	Brucella suis ATCC 23445	6	6	0
16771	Buchnera aphidicola str. 5A (Acyrthosiphon pisum)	20	0	20	OG_00084320	OG_00136158	OG_00309120	OG_00379159	OG_00486141	OG_00486321	OG_00486637	OG_00486694	OG_00497785	OG_00586063	OG_00636131	OG_00687521	OG_00701205	OG_00801347	OG_00803071	OG_00803249	OG_00803265	OG_00803677	OG_00804133	OG_00804361
16772	Buchnera aphidicola str. APS (Acyrthosiphon pisum)	20	0	20	OG_00084320	OG_00136158	OG_00309120	OG_00379159	OG_00486141	OG_00486321	OG_00486637	OG_00486694	OG_00497785	OG_00586063	OG_00636131	OG_00687521	OG_00701205	OG_00801347	OG_00803071	OG_00803249	OG_00803265	OG_00803677	OG_00804133	OG_00804361
16773	Buchnera aphidicola str. Bp (Baizongia pistaciae)	36	2	34	OG_00084320	OG_00136158	OG_00279053	OG_00309120	OG_00379159	OG_00483928	OG_00485983	OG_00486141	OG_00486321	OG_00486637	OG_00486694	OG_00487020	OG_00487083	OG_00497785	OG_00586063	OG_00636131	OG_00687521	OG_00701205	OG_00763113	OG_00763245	OG_00764076	OG_00764224	OG_00778584	OG_00801347	OG_00802487	OG_00803028	OG_00803071	OG_00803249	OG_00803265	OG_00803677	OG_00804133	OG_00804361	OG_00804544	OG_00828057
16774	Buchnera aphidicola str. Cc (Cinara cedri)	68	4	64	OG_00006771	OG_00084320	OG_00085192	OG_00086231	OG_00136158	OG_00279053	OG_00309120	OG_00342722	OG_00379159	OG_00483928	OG_00485818	OG_00485948	OG_00485977	OG_00485983	OG_00485987	OG_00486087	OG_00486141	OG_00486269	OG_00486321	OG_00486423	OG_00486637	OG_00486694	OG_00487008	OG_00487020	OG_00487043	OG_00487083	OG_00487145	OG_00487149	OG_00487272	OG_00487309	OG_00497785	OG_00499434	OG_00582020	OG_00586063	OG_00601994	OG_00636131	OG_00687521	OG_00701205	OG_00743491	OG_00763113	OG_00764224	OG_00778584	OG_00778648	OG_00779047	OG_00779674
19791	Buchnera aphidicola str. JF98 (Acyrthosiphon pisum)	58	18	40	OG_00084320	OG_00136158	OG_00309120	OG_00379159	OG_00474144	OG_00486087	OG_00486141	OG_00486222	OG_00486238	OG_00486321	OG_00486356	OG_00486409	OG_00486637	OG_00486694	OG_00487061	OG_00487105	OG_00487168	OG_00487322	OG_00586063	OG_00636131	OG_00687521	OG_00701205	OG_00732074	OG_00762959	OG_00763245	OG_00776156	OG_00792356	OG_00795347	OG_00801347	OG_00803071	OG_00803249	OG_00803265	OG_00803544	OG_00803677	OG_00804068	OG_00804133	OG_00804286	OG_00804361	OG_00828057	OG_00871666
19792	Buchnera aphidicola str. JF99 (Acyrthosiphon pisum)	23	2	21	OG_00084320	OG_00136158	OG_00309120	OG_00379159	OG_00486141	OG_00486321	OG_00486637	OG_00486694	OG_00487272	OG_00586063	OG_00636131	OG_00687521	OG_00701205	OG_00763889	OG_00801347	OG_00803071	OG_00803249	OG_00803265	OG_00803677	OG_00804133	OG_00804361
19793	Buchnera aphidicola str. LL01 (Acyrthosiphon pisum)	24	2	22	OG_00084320	OG_00136158	OG_00309120	OG_00379159	OG_00486141	OG_00486321	OG_00486637	OG_00486694	OG_00486957	OG_00487272	OG_00586063	OG_00636131	OG_00687521	OG_00701205	OG_00801347	OG_00803071	OG_00803249	OG_00803265	OG_00803677	OG_00804133	OG_00804361	OG_00828262
16775	Buchnera aphidicola str. Sg (Schizaphis graminum)	27	6	21	OG_00084320	OG_00136158	OG_00309120	OG_00379159	OG_00486141	OG_00486321	OG_00486637	OG_00486694	OG_00487208	OG_00497785	OG_00586063	OG_00636131	OG_00687521	OG_00701205	OG_00801347	OG_00803071	OG_00803249	OG_00803265	OG_00803677	OG_00804133	OG_00804361
19794	Buchnera aphidicola str. TLW03 (Acyrthosiphon pisum)	25	3	22	OG_00084320	OG_00136158	OG_00309120	OG_00379159	OG_00486141	OG_00486321	OG_00486637	OG_00486694	OG_00487272	OG_00586063	OG_00636131	OG_00687521	OG_00701205	OG_00778648	OG_00801347	OG_00803071	OG_00803249	OG_00803265	OG_00803677	OG_00804133	OG_00804361	OG_00871578
16776	Buchnera aphidicola str. Tuc7 (Acyrthosiphon pisum)	21	1	20	OG_00084320	OG_00136158	OG_00309120	OG_00379159	OG_00486141	OG_00486321	OG_00486637	OG_00486694	OG_00497785	OG_00586063	OG_00636131	OG_00687521	OG_00701205	OG_00801347	OG_00803071	OG_00803249	OG_00803265	OG_00803677	OG_00804133	OG_00804361
16777	Burkholderia ambifaria AMMD	1	0	1	OG_00279053
16778	Burkholderia ambifaria MC40-6	1	0	1	OG_00279053
16779	Burkholderia cenocepacia AU 1054	1	1	0
16780	Burkholderia cenocepacia HI2424	1	1	0
16781	Burkholderia cenocepacia J2315	3	2	1	OG_00279053
16782	Burkholderia cenocepacia MC0-3	1	0	1	OG_00279053
16783	Burkholderia glumae BGR1	1	1	0
16784	Burkholderia mallei ATCC 23344	1	0	1	OG_00279053
16785	Burkholderia mallei NCTC 10229	2	1	1	OG_00279053
16786	Burkholderia mallei NCTC 10247	1	0	1	OG_00279053
16787	Burkholderia mallei SAVP1	1	0	1	OG_00279053
16788	Burkholderia multivorans ATCC 17616	1	1	0
16789	Burkholderia multivorans ATCC 17616	1	1	0
16790	Burkholderia phymatum STM815	1	1	0
16791	Burkholderia phytofirmans PsJN	1	0	1	OG_00279053
16792	Burkholderia pseudomallei 1106a	2	1	1	OG_00279053
16793	Burkholderia pseudomallei 1710b	3	2	1	OG_00279053
16794	Burkholderia pseudomallei 668	2	1	1	OG_00279053
16795	Burkholderia pseudomallei K96243	2	1	1	OG_00279053
16796	Burkholderia sp. 383	1	0	1	OG_00279053
19795	Burkholderia sp. CCGE1002	1	1	0
19796	Burkholderia sp. CCGE1003	1	1	0
16797	Burkholderia thailandensis E264	1	0	1	OG_00279053
16798	Burkholderia vietnamiensis G4	1	1	0
16799	Burkholderia xenovorans LB400	1	0	1	OG_00279053
20091	butyrate-producing bacterium SM4/1	102	48	54	OG_00084244	OG_00084320	OG_00136158	OG_00485810	OG_00485816	OG_00485818	OG_00486027	OG_00486028	OG_00486087	OG_00486136	OG_00486269	OG_00486357	OG_00486478	OG_00486535	OG_00486823	OG_00486948	OG_00486996	OG_00487008	OG_00487027	OG_00487043	OG_00487053	OG_00487061	OG_00487105	OG_00487168	OG_00487208	OG_00487309	OG_00487322	OG_00499434	OG_00687521	OG_00698526	OG_00762512	OG_00763948	OG_00764224	OG_00776156	OG_00780165	OG_00793487	OG_00802410	OG_00802487	OG_00802543	OG_00802794	OG_00803071	OG_00803130	OG_00803265	OG_00803966	OG_00804068
20092	butyrate-producing bacterium SS3/4	24	19	5	OG_00279053	OG_00485818	OG_00487008	OG_00804698	OG_00871498
20093	butyrate-producing bacterium SSC/2	24	19	5	OG_00486222	OG_00486225	OG_00776156	OG_00777384	OG_00804544
19797	Butyrivibrio fibrisolvens	18	13	5	OG_00095538	OG_00487083	OG_00776156	OG_00803071	OG_00804698
19798	Butyrivibrio proteoclasticus B316	6	4	2	OG_00721630	OG_00776156
16670	Caldicellulosiruptor bescii DSM 6725	9	5	4	OG_00372429	OG_00687521	OG_00743491	OG_00804286
19799	Caldicellulosiruptor hydrothermalis 108	8	4	4	OG_00372429	OG_00687521	OG_00743491	OG_00804286
19800	Caldicellulosiruptor kristjanssonii 177R1B	8	4	4	OG_00372429	OG_00687521	OG_00743491	OG_00804286
19801	Caldicellulosiruptor kronotskyensis 2002	8	4	4	OG_00372429	OG_00687521	OG_00743491	OG_00804286
19802	Caldicellulosiruptor obsidiansis OB47	9	4	5	OG_00372429	OG_00687521	OG_00721630	OG_00743491	OG_00804286
19803	Caldicellulosiruptor owensensis OL	9	4	5	OG_00372429	OG_00687521	OG_00721630	OG_00743491	OG_00804286
16800	Caldicellulosiruptor saccharolyticus DSM 8903	8	4	4	OG_00372429	OG_00687521	OG_00743491	OG_00804286
19804	Calditerrivibrio nitroreducens DSM 19672	1	0	1	OG_00601994
16802	Campylobacter concisus 13826	20	13	7	OG_00486269	OG_00487008	OG_00763889	OG_00776156	OG_00803028	OG_00804544	OG_00871578
16803	Campylobacter curvus 525.92	14	10	4	OG_00486269	OG_00763889	OG_00776156	OG_00803028
16804	Campylobacter fetus subsp. fetus 82-40	4	0	4	OG_00486269	OG_00763889	OG_00776156	OG_00803028
16805	Campylobacter hominis ATCC BAA-381	5	1	4	OG_00486269	OG_00763889	OG_00776156	OG_00803028
16806	Campylobacter jejuni RM1221	4	0	4	OG_00486269	OG_00763889	OG_00776156	OG_00803028
16807	Campylobacter jejuni subsp. doylei 269.97	7	2	5	OG_00486269	OG_00497785	OG_00763889	OG_00776156	OG_00803028
16809	Campylobacter jejuni subsp. jejuni 81116	4	0	4	OG_00486269	OG_00763889	OG_00776156	OG_00803028
16808	Campylobacter jejuni subsp. jejuni 81-176	4	0	4	OG_00486269	OG_00763889	OG_00776156	OG_00803028
17656	Campylobacter jejuni subsp. jejuni IA3902	4	0	4	OG_00486269	OG_00763889	OG_00776156	OG_00803028
19805	Campylobacter jejuni subsp. jejuni ICDCCJ07001	32	25	7	OG_00486197	OG_00486269	OG_00763889	OG_00776156	OG_00802959	OG_00803028	OG_00871666
19806	Campylobacter jejuni subsp. jejuni M1	4	0	4	OG_00486269	OG_00763889	OG_00776156	OG_00803028
16810	Campylobacter jejuni subsp. jejuni NCTC 11168	4	0	4	OG_00486269	OG_00763889	OG_00776156	OG_00803028
19807	Campylobacter jejuni subsp. jejuni S3	4	0	4	OG_00486269	OG_00763889	OG_00776156	OG_00803028
16811	Campylobacter lari RM2100	5	0	5	OG_00486269	OG_00497785	OG_00763889	OG_00776156	OG_00803028
16812	Candidatus Accumulibacter phosphatis clade IIA str. UW-1	1	1	0
16813	Candidatus Amoebophilus asiaticus 5a2	22	0	22	OG_00136158	OG_00372429	OG_00483928	OG_00485899	OG_00486028	OG_00486136	OG_00487020	OG_00487043	OG_00487083	OG_00487145	OG_00497785	OG_00586063	OG_00743491	OG_00763113	OG_00763245	OG_00778584	OG_00801347	OG_00802543	OG_00803249	OG_00803677	OG_00803686	OG_00804361
16814	Candidatus Azobacteroides pseudotrichonymphae genomovar. CFP2	9	3	6	OG_00120492	OG_00486028	OG_00499205	OG_00586063	OG_00743491	OG_00778584
16815	Candidatus Blochmannia floridanus	24	0	24	OG_00084244	OG_00084320	OG_00084366	OG_00120492	OG_00136158	OG_00279053	OG_00379159	OG_00486141	OG_00486694	OG_00487020	OG_00487083	OG_00487272	OG_00636131	OG_00687521	OG_00762512	OG_00763113	OG_00764224	OG_00778584	OG_00779047	OG_00801347	OG_00802676	OG_00803265	OG_00804133	OG_00828057
16816	Candidatus Blochmannia pennsylvanicus str. BPEN	21	0	21	OG_00084244	OG_00084320	OG_00084366	OG_00120492	OG_00136158	OG_00279053	OG_00379159	OG_00486141	OG_00486694	OG_00487272	OG_00636131	OG_00687521	OG_00762512	OG_00764224	OG_00778584	OG_00779047	OG_00801347	OG_00802676	OG_00803265	OG_00804133	OG_00828057
16817	Candidatus Carsonella ruddii PV	131	0	131	OG_00006771	OG_00084244	OG_00084320	OG_00084366	OG_00085192	OG_00086231	OG_00095538	OG_00120492	OG_00136158	OG_00177296	OG_00279053	OG_00309120	OG_00342722	OG_00372429	OG_00379159	OG_00483928	OG_00485878	OG_00485899	OG_00485948	OG_00485977	OG_00486027	OG_00486028	OG_00486087	OG_00486136	OG_00486141	OG_00486197	OG_00486269	OG_00486321	OG_00486356	OG_00486357	OG_00486359	OG_00486409	OG_00486423	OG_00486535	OG_00486637	OG_00486823	OG_00486957	OG_00486990	OG_00486996	OG_00487008	OG_00487020	OG_00487027	OG_00487043	OG_00487061	OG_00487076
16818	Candidatus Desulforudis audaxviator MP104C	9	4	5	OG_00372429	OG_00487145	OG_00586063	OG_00762512	OG_00776156
16819	Candidatus Hamiltonella defensa 5AT (Acyrthosiphon pisum)	2	0	2	OG_00486409	OG_00801347
16820	Candidatus Hodgkinia cicadicola Dsem	151	0	151	OG_00006771	OG_00084244	OG_00084320	OG_00084366	OG_00085192	OG_00086231	OG_00095538	OG_00120492	OG_00120621	OG_00136158	OG_00177296	OG_00237963	OG_00279053	OG_00309120	OG_00342722	OG_00372429	OG_00379159	OG_00439379	OG_00474144	OG_00474462	OG_00483928	OG_00485816	OG_00485818	OG_00485899	OG_00485948	OG_00485977	OG_00485983	OG_00485987	OG_00486027	OG_00486028	OG_00486087	OG_00486136	OG_00486141	OG_00486197	OG_00486238	OG_00486269	OG_00486321	OG_00486356	OG_00486357	OG_00486359	OG_00486366	OG_00486423	OG_00486525	OG_00486535	OG_00486637
16822	Candidatus Koribacter versatilis Ellin345	2	1	1	OG_00486141
16823	Candidatus Liberibacter asiaticus str. psy62	16	8	8	OG_00136158	OG_00372429	OG_00487208	OG_00497785	OG_00743491	OG_00801347	OG_00802962	OG_00804224
19808	Candidatus Liberibacter solanacearum CLso-ZC1	14	7	7	OG_00136158	OG_00372429	OG_00497785	OG_00743491	OG_00801347	OG_00802962	OG_00804224
19809	Candidatus Nitrospira defluvii	4	1	3	OG_00372429	OG_00779674	OG_00871578
16825	Candidatus Pelagibacter ubique HTCC1062	12	0	12	OG_00084320	OG_00084366	OG_00485899	OG_00486141	OG_00486637	OG_00499205	OG_00687521	OG_00743491	OG_00762512	OG_00779047	OG_00802487	OG_00802962
16826	Candidatus Phytoplasma australiense	49	0	49	OG_00006771	OG_00084320	OG_00309120	OG_00342722	OG_00485948	OG_00485987	OG_00486087	OG_00486136	OG_00486141	OG_00486366	OG_00486409	OG_00486423	OG_00486637	OG_00486694	OG_00487008	OG_00487020	OG_00487083	OG_00487145	OG_00487149	OG_00487174	OG_00487272	OG_00497785	OG_00499434	OG_00586063	OG_00597137	OG_00605287	OG_00637411	OG_00687521	OG_00700773	OG_00701205	OG_00721630	OG_00732074	OG_00762512	OG_00763113	OG_00778584	OG_00778648	OG_00801347	OG_00802510	OG_00802794	OG_00803071	OG_00803249	OG_00803677	OG_00803686	OG_00803966	OG_00804133
16827	Candidatus Phytoplasma mali	53	1	52	OG_00006771	OG_00309120	OG_00342722	OG_00379159	OG_00474462	OG_00483928	OG_00485948	OG_00485987	OG_00486087	OG_00486136	OG_00486141	OG_00486359	OG_00486366	OG_00486409	OG_00486423	OG_00486637	OG_00487008	OG_00487020	OG_00487083	OG_00487145	OG_00487149	OG_00487174	OG_00487272	OG_00497785	OG_00499205	OG_00499434	OG_00586063	OG_00597137	OG_00605287	OG_00636131	OG_00637411	OG_00700773	OG_00701205	OG_00721630	OG_00732074	OG_00762512	OG_00763113	OG_00778584	OG_00778648	OG_00801347	OG_00802510	OG_00802794	OG_00803071	OG_00803249	OG_00803265
16828	Candidatus Protochlamydia amoebophila UWE25	8	0	8	OG_00136158	OG_00486321	OG_00486357	OG_00487083	OG_00636131	OG_00779047	OG_00803249	OG_00803677
19811	Candidatus Riesia pediculicola USDA	31	2	29	OG_00084320	OG_00084366	OG_00120492	OG_00136158	OG_00279053	OG_00379159	OG_00485987	OG_00486141	OG_00486637	OG_00487149	OG_00497785	OG_00601994	OG_00636131	OG_00687521	OG_00701205	OG_00762512	OG_00764224	OG_00778584	OG_00778648	OG_00779047	OG_00801347	OG_00802410	OG_00802676	OG_00802794	OG_00802962	OG_00803071	OG_00803265	OG_00804133	OG_00871589
16829	Candidatus Ruthia magnifica str. Cm (Calyptogena magnifica)	9	0	9	OG_00084320	OG_00309120	OG_00486141	OG_00486694	OG_00687521	OG_00762512	OG_00778584	OG_00804133	OG_00804224
19812	Candidatus Sulcia muelleri CARI	88	2	86	OG_00084320	OG_00095538	OG_00120492	OG_00136158	OG_00177296	OG_00279053	OG_00309120	OG_00342722	OG_00372429	OG_00379159	OG_00439379	OG_00483928	OG_00485899	OG_00485948	OG_00486027	OG_00486028	OG_00486087	OG_00486136	OG_00486141	OG_00486197	OG_00486269	OG_00486356	OG_00486359	OG_00486409	OG_00486423	OG_00486535	OG_00486637	OG_00486694	OG_00486957	OG_00486996	OG_00487008	OG_00487020	OG_00487027	OG_00487043	OG_00487083	OG_00487145	OG_00487174	OG_00487208	OG_00487272	OG_00487309	OG_00487322	OG_00497785	OG_00499205	OG_00499304	OG_00499434
19813	Candidatus Sulcia muelleri DMIN	103	1	102	OG_00084244	OG_00084320	OG_00084366	OG_00095538	OG_00120492	OG_00136158	OG_00177296	OG_00279053	OG_00309120	OG_00342722	OG_00372429	OG_00379159	OG_00439379	OG_00474144	OG_00483928	OG_00485816	OG_00485899	OG_00485948	OG_00485983	OG_00486027	OG_00486028	OG_00486087	OG_00486136	OG_00486141	OG_00486197	OG_00486238	OG_00486269	OG_00486356	OG_00486359	OG_00486409	OG_00486423	OG_00486535	OG_00486637	OG_00486694	OG_00486957	OG_00486996	OG_00487008	OG_00487020	OG_00487027	OG_00487043	OG_00487061	OG_00487083	OG_00487105	OG_00487145	OG_00487174
16831	Candidatus Sulcia muelleri GWSS	101	0	101	OG_00084244	OG_00084320	OG_00084366	OG_00095538	OG_00120492	OG_00136158	OG_00177296	OG_00279053	OG_00309120	OG_00342722	OG_00372429	OG_00379159	OG_00439379	OG_00474144	OG_00483928	OG_00485816	OG_00485899	OG_00485948	OG_00485983	OG_00486027	OG_00486087	OG_00486136	OG_00486141	OG_00486197	OG_00486238	OG_00486269	OG_00486356	OG_00486359	OG_00486409	OG_00486423	OG_00486535	OG_00486637	OG_00486694	OG_00486957	OG_00486996	OG_00487008	OG_00487020	OG_00487027	OG_00487043	OG_00487061	OG_00487083	OG_00487105	OG_00487145	OG_00487174	OG_00487208
16832	Candidatus Sulcia muelleri SMDSEM	97	0	97	OG_00084244	OG_00084320	OG_00084366	OG_00085192	OG_00095538	OG_00120492	OG_00136158	OG_00177296	OG_00279053	OG_00309120	OG_00342722	OG_00372429	OG_00379159	OG_00439379	OG_00474144	OG_00483928	OG_00485818	OG_00485899	OG_00485948	OG_00486027	OG_00486028	OG_00486087	OG_00486136	OG_00486141	OG_00486197	OG_00486269	OG_00486356	OG_00486359	OG_00486366	OG_00486423	OG_00486535	OG_00486637	OG_00486694	OG_00486957	OG_00486996	OG_00487008	OG_00487020	OG_00487027	OG_00487043	OG_00487083	OG_00487145	OG_00487174	OG_00487208	OG_00487272	OG_00487309
16833	Candidatus Vesicomyosocius okutanii HA	8	0	8	OG_00309120	OG_00379159	OG_00486141	OG_00486694	OG_00636131	OG_00803265	OG_00804133	OG_00804224
19814	Candidatus Zinderia insecticola CARI	119	0	119	OG_00006771	OG_00084244	OG_00084320	OG_00084366	OG_00085192	OG_00095538	OG_00120492	OG_00136158	OG_00177296	OG_00237963	OG_00279053	OG_00309120	OG_00342722	OG_00372429	OG_00379159	OG_00439379	OG_00474462	OG_00483928	OG_00485878	OG_00485899	OG_00485948	OG_00485983	OG_00485987	OG_00486027	OG_00486028	OG_00486066	OG_00486087	OG_00486136	OG_00486141	OG_00486197	OG_00486269	OG_00486356	OG_00486357	OG_00486359	OG_00486366	OG_00486409	OG_00486423	OG_00486535	OG_00486637	OG_00486694	OG_00486957	OG_00486996	OG_00487008	OG_00487020	OG_00487027
16834	Capnocytophaga ochracea DSM 7271	1	0	1	OG_00586063
16835	Carboxydothermus hydrogenoformans Z-2901	6	3	3	OG_00586063	OG_00743491	OG_00804286
16837	Caulobacter crescentus CB15	1	1	0
19815	Caulobacter segnis ATCC 21756	5	4	1	OG_00871578
19816	Cellulomonas flavigena DSM 20109	2	2	0
16841	Chelativorans sp. BNC1	4	4	0
16842	Chitinophaga pinensis DSM 2588	2	1	1	OG_00586063
16843	Chlamydia muridarum Nigg	19	3	16	OG_00136158	OG_00237963	OG_00485987	OG_00486321	OG_00486357	OG_00487083	OG_00487149	OG_00636131	OG_00763113	OG_00778584	OG_00778648	OG_00779047	OG_00801347	OG_00802794	OG_00803686	OG_00871589
16844	Chlamydia trachomatis 434/Bu	17	0	17	OG_00136158	OG_00485987	OG_00486321	OG_00486357	OG_00487083	OG_00487149	OG_00636131	OG_00763113	OG_00778584	OG_00778648	OG_00779047	OG_00801347	OG_00802794	OG_00803249	OG_00803677	OG_00803686	OG_00871589
16845	Chlamydia trachomatis A/HAR-13	17	0	17	OG_00136158	OG_00485987	OG_00486321	OG_00486357	OG_00487083	OG_00487149	OG_00636131	OG_00763113	OG_00778584	OG_00778648	OG_00779047	OG_00801347	OG_00802794	OG_00803249	OG_00803677	OG_00803686	OG_00871589
16846	Chlamydia trachomatis B/Jali20/OT	17	0	17	OG_00136158	OG_00485987	OG_00486321	OG_00486357	OG_00487083	OG_00487149	OG_00636131	OG_00763113	OG_00778584	OG_00778648	OG_00779047	OG_00801347	OG_00802794	OG_00803249	OG_00803677	OG_00803686	OG_00871589
16847	Chlamydia trachomatis B/TZ1A828/OT	17	0	17	OG_00136158	OG_00485987	OG_00486321	OG_00486357	OG_00487083	OG_00487149	OG_00636131	OG_00763113	OG_00778584	OG_00778648	OG_00779047	OG_00801347	OG_00802794	OG_00803249	OG_00803677	OG_00803686	OG_00871589
16848	Chlamydia trachomatis D/UW-3/CX	17	0	17	OG_00136158	OG_00485987	OG_00486321	OG_00486357	OG_00487083	OG_00487149	OG_00636131	OG_00763113	OG_00778584	OG_00778648	OG_00779047	OG_00801347	OG_00802794	OG_00803249	OG_00803677	OG_00803686	OG_00871589
19817	Chlamydia trachomatis D-EC	20	2	18	OG_00136158	OG_00485987	OG_00486321	OG_00486357	OG_00487083	OG_00487149	OG_00636131	OG_00763113	OG_00778584	OG_00778648	OG_00779047	OG_00801347	OG_00802794	OG_00803249	OG_00803677	OG_00803686	OG_00871557	OG_00871589
19818	Chlamydia trachomatis D-LC	20	2	18	OG_00136158	OG_00485987	OG_00486321	OG_00486357	OG_00487083	OG_00487149	OG_00636131	OG_00763113	OG_00778584	OG_00778648	OG_00779047	OG_00801347	OG_00802794	OG_00803249	OG_00803677	OG_00803686	OG_00871557	OG_00871589
19819	Chlamydia trachomatis E/11023	17	0	17	OG_00136158	OG_00485987	OG_00486321	OG_00486357	OG_00487083	OG_00487149	OG_00636131	OG_00763113	OG_00778584	OG_00778648	OG_00779047	OG_00801347	OG_00802794	OG_00803249	OG_00803677	OG_00803686	OG_00871589
19820	Chlamydia trachomatis E/150	17	0	17	OG_00136158	OG_00485987	OG_00486321	OG_00486357	OG_00487083	OG_00487149	OG_00636131	OG_00763113	OG_00778584	OG_00778648	OG_00779047	OG_00801347	OG_00802794	OG_00803249	OG_00803677	OG_00803686	OG_00871589
19821	Chlamydia trachomatis G/11074	17	0	17	OG_00136158	OG_00485987	OG_00486321	OG_00486357	OG_00487083	OG_00487149	OG_00636131	OG_00763113	OG_00778584	OG_00778648	OG_00779047	OG_00801347	OG_00802794	OG_00803249	OG_00803677	OG_00803686	OG_00871589
19822	Chlamydia trachomatis G/11222	17	0	17	OG_00136158	OG_00485987	OG_00486321	OG_00486357	OG_00487083	OG_00487149	OG_00636131	OG_00763113	OG_00778584	OG_00778648	OG_00779047	OG_00801347	OG_00802794	OG_00803249	OG_00803677	OG_00803686	OG_00871589
19823	Chlamydia trachomatis G/9301	17	0	17	OG_00136158	OG_00485987	OG_00486321	OG_00486357	OG_00487083	OG_00487149	OG_00636131	OG_00763113	OG_00778584	OG_00778648	OG_00779047	OG_00801347	OG_00802794	OG_00803249	OG_00803677	OG_00803686	OG_00871589
19824	Chlamydia trachomatis G/9768	17	0	17	OG_00136158	OG_00485987	OG_00486321	OG_00486357	OG_00487083	OG_00487149	OG_00636131	OG_00763113	OG_00778584	OG_00778648	OG_00779047	OG_00801347	OG_00802794	OG_00803249	OG_00803677	OG_00803686	OG_00871589
16849	Chlamydia trachomatis L2b/UCH-1/proctitis	17	0	17	OG_00136158	OG_00485987	OG_00486321	OG_00486357	OG_00487083	OG_00487149	OG_00636131	OG_00763113	OG_00778584	OG_00778648	OG_00779047	OG_00801347	OG_00802794	OG_00803249	OG_00803677	OG_00803686	OG_00871589
19825	Chlamydia trachomatis Sweden2	17	0	17	OG_00136158	OG_00485987	OG_00486321	OG_00486357	OG_00487083	OG_00487149	OG_00636131	OG_00763113	OG_00778584	OG_00778648	OG_00779047	OG_00801347	OG_00802794	OG_00803249	OG_00803677	OG_00803686	OG_00871589
16850	Chlamydophila abortus S26/3	17	0	17	OG_00136158	OG_00485987	OG_00486321	OG_00486357	OG_00487083	OG_00487149	OG_00636131	OG_00763113	OG_00778584	OG_00778648	OG_00779047	OG_00801347	OG_00802794	OG_00803249	OG_00803677	OG_00803686	OG_00871589
16851	Chlamydophila caviae GPIC	19	4	15	OG_00136158	OG_00485987	OG_00486321	OG_00486357	OG_00487083	OG_00487149	OG_00636131	OG_00763113	OG_00778584	OG_00778648	OG_00779047	OG_00801347	OG_00802794	OG_00803686	OG_00871589
16852	Chlamydophila felis Fe/C-56	15	0	15	OG_00136158	OG_00485987	OG_00486321	OG_00486357	OG_00487083	OG_00487149	OG_00636131	OG_00763113	OG_00778584	OG_00778648	OG_00779047	OG_00801347	OG_00802794	OG_00803686	OG_00871589
19826	Chlamydophila pneumoniae AR39	16	0	16	OG_00136158	OG_00485987	OG_00486321	OG_00486357	OG_00487083	OG_00487149	OG_00636131	OG_00763113	OG_00778584	OG_00778648	OG_00779047	OG_00801347	OG_00802794	OG_00803677	OG_00803686	OG_00871589
16854	Chlamydophila pneumoniae CWL029	15	0	15	OG_00136158	OG_00485987	OG_00486321	OG_00486357	OG_00487083	OG_00487149	OG_00636131	OG_00763113	OG_00778584	OG_00778648	OG_00779047	OG_00801347	OG_00802794	OG_00803686	OG_00871589
16855	Chlamydophila pneumoniae J138	15	0	15	OG_00136158	OG_00485987	OG_00486321	OG_00486357	OG_00487083	OG_00487149	OG_00636131	OG_00763113	OG_00778584	OG_00778648	OG_00779047	OG_00801347	OG_00802794	OG_00803686	OG_00871589
17657	Chlamydophila pneumoniae LPCoLN	18	1	17	OG_00136158	OG_00485987	OG_00486321	OG_00486357	OG_00487083	OG_00487149	OG_00636131	OG_00763113	OG_00778584	OG_00778648	OG_00779047	OG_00801347	OG_00802794	OG_00803249	OG_00803677	OG_00803686	OG_00871589
16856	Chlamydophila pneumoniae TW-183	15	0	15	OG_00136158	OG_00485987	OG_00486321	OG_00486357	OG_00487083	OG_00487149	OG_00636131	OG_00763113	OG_00778584	OG_00778648	OG_00779047	OG_00801347	OG_00802794	OG_00803686	OG_00871589
16857	Chlorobaculum parvum NCIB 8327	3	2	1	OG_00499205
16858	Chlorobium chlorochromatii CaD3	1	0	1	OG_00499205
16859	Chlorobium limicola DSM 245	2	0	2	OG_00499205	OG_00778648
16860	Chlorobium luteolum DSM 273	2	1	1	OG_00499205
16861	Chlorobium phaeobacteroides BS1	2	0	2	OG_00486222	OG_00499205
16862	Chlorobium phaeobacteroides DSM 266	1	0	1	OG_00499205
16863	Chlorobium phaeovibrioides DSM 265	1	0	1	OG_00499205
16864	Chlorobium tepidum TLS	2	1	1	OG_00499205
16865	Chloroflexus aggregans DSM 9485	4	3	1	OG_00802959
16866	Chloroflexus aurantiacus J-10-fl	4	3	1	OG_00486366
16867	Chloroflexus sp. Y-400-fl	3	3	0
16869	Chromobacterium violaceum ATCC 12472	1	1	0
16871	Citrobacter koseri ATCC BAA-895	5	5	0
16873	Clavibacter michiganensis subsp. michiganensis NCPPB 382	3	1	2	OG_00487145	OG_00871433
16874	Clavibacter michiganensis subsp. sepedonicus	3	1	2	OG_00487145	OG_00871433
19827	Clostridiales genomosp. BVAB3 str. UPII9-5	14	6	8	OG_00485977	OG_00487272	OG_00497785	OG_00597137	OG_00637411	OG_00776156	OG_00802543	OG_00871498
16875	Clostridium acetobutylicum ATCC 824	3	3	0
16876	Clostridium beijerinckii NCIMB 8052	6	5	1	OG_00776156
16877	Clostridium botulinum A str. ATCC 19397	6	6	0
16878	Clostridium botulinum A str. ATCC 3502	5	5	0
16879	Clostridium botulinum A str. Hall	5	5	0
16880	Clostridium botulinum A2 str. Kyoto	5	4	1	OG_00776156
16881	Clostridium botulinum A3 str. Loch Maree	5	4	1	OG_00776156
16882	Clostridium botulinum B str. Eklund 17B	5	4	1	OG_00776156
16883	Clostridium botulinum B1 str. Okra	5	5	0
16884	Clostridium botulinum Ba4 str. 657	5	4	1	OG_00776156
16885	Clostridium botulinum E3 str. Alaska E43	5	4	1	OG_00776156
19828	Clostridium botulinum F str. 230613	10	7	3	OG_00764199	OG_00776156	OG_00803966
16886	Clostridium botulinum F str. Langeland	5	4	1	OG_00776156
16887	Clostridium cellulolyticum H10	6	5	1	OG_00776156
19829	Clostridium cellulovorans 743B	4	4	0
19830	Clostridium cf. saccharolyticum K10	23	17	6	OG_00084244	OG_00485818	OG_00803071	OG_00804698	OG_00871498	OG_00871666
16888	Clostridium difficile 630	6	5	1	OG_00802543
16889	Clostridium difficile CD196	5	4	1	OG_00802543
16890	Clostridium difficile R20291	6	5	1	OG_00802543
16891	Clostridium kluyveri DSM 555	4	4	0
16892	Clostridium kluyveri NBRC 12016	4	4	0
19836	Clostridium ljungdahlii DSM 13528	4	4	0
16893	Clostridium novyi NT	4	4	0
16894	Clostridium perfringens ATCC 13124	6	4	2	OG_00486222	OG_00776156
19837	Clostridium perfringens SM101	6	5	1	OG_00486222
16896	Clostridium perfringens str. 13	6	5	1	OG_00776156
16897	Clostridium phytofermentans ISDg	6	4	2	OG_00487043	OG_00776156
19838	Clostridium saccharolyticum WM1	4	3	1	OG_00095538
19839	Clostridium sticklandii DSM 519	6	4	2	OG_00605287	OG_00802543
16898	Clostridium tetani E88	30	20	10	OG_00485987	OG_00487149	OG_00743491	OG_00776156	OG_00778648	OG_00802543	OG_00802794	OG_00802959	OG_00871498	OG_00871589
16899	Clostridium thermocellum ATCC 27405	6	4	2	OG_00499205	OG_00776156
19840	Clostridium thermocellum DSM 1313	6	4	2	OG_00499205	OG_00776156
19841	Comamonas testosteroni CNB-1	1	0	1	OG_00279053
16902	Conexibacter woesei DSM 14684	3	2	1	OG_00279053
19842	Coprococcus catus GD/7	26	17	9	OG_00085192	OG_00095538	OG_00485818	OG_00486357	OG_00776156	OG_00803071	OG_00803966	OG_00804698	OG_00871666
19843	Coprococcus sp. ART55/1	49	31	18	OG_00085192	OG_00237963	OG_00486027	OG_00486028	OG_00486066	OG_00486366	OG_00486754	OG_00487083	OG_00487096	OG_00487167	OG_00762959	OG_00763822	OG_00776156	OG_00803071	OG_00804018	OG_00804544	OG_00804698	OG_00871666
16903	Coprothermobacter proteolyticus DSM 5265	22	3	19	OG_00084366	OG_00279053	OG_00372429	OG_00486087	OG_00486197	OG_00487020	OG_00487149	OG_00487167	OG_00586063	OG_00605287	OG_00637411	OG_00687521	OG_00721630	OG_00763113	OG_00776156	OG_00804278	OG_00804286	OG_00828057	OG_00871557
19844	Coraliomargarita akajimensis DSM 45221	6	4	2	OG_00279053	OG_00803028
16904	Corynebacterium aurimucosum ATCC 700975	4	0	4	OG_00085192	OG_00120492	OG_00597137	OG_00802543
16905	Corynebacterium diphtheriae NCTC 13129	4	0	4	OG_00085192	OG_00120492	OG_00597137	OG_00802543
16906	Corynebacterium efficiens YS-314	2	0	2	OG_00120492	OG_00597137
16907	Corynebacterium glutamicum ATCC 13032	2	0	2	OG_00120492	OG_00597137
16908	Corynebacterium glutamicum ATCC 13032	2	0	2	OG_00120492	OG_00597137
16909	Corynebacterium glutamicum R	2	0	2	OG_00120492	OG_00597137
16910	Corynebacterium jeikeium K411	3	1	2	OG_00120492	OG_00597137
16911	Corynebacterium kroppenstedtii DSM 44385	4	1	3	OG_00085192	OG_00120492	OG_00486141
19845	Corynebacterium pseudotuberculosis 1002	4	0	4	OG_00085192	OG_00120492	OG_00597137	OG_00802543
19846	Corynebacterium pseudotuberculosis C231	4	0	4	OG_00085192	OG_00120492	OG_00597137	OG_00802543
19847	Corynebacterium pseudotuberculosis FRC41	4	0	4	OG_00085192	OG_00120492	OG_00597137	OG_00802543
19848	Corynebacterium pseudotuberculosis I19	4	0	4	OG_00085192	OG_00120492	OG_00597137	OG_00802543
16912	Corynebacterium urealyticum DSM 7109	3	0	3	OG_00120492	OG_00597137	OG_00802543
16913	Coxiella burnetii CbuG_Q212	1	1	0
16914	Coxiella burnetii CbuK_Q154	2	2	0
19849	Croceibacter atlanticus HTCC2559	2	1	1	OG_00586063
16918	Cronobacter sakazakii ATCC BAA-894	5	5	0
16920	Cryptobacterium curtum DSM 15641	5	1	4	OG_00085192	OG_00120492	OG_00486141	OG_00499205
17350	Cupriavidus metallidurans CH34	1	1	0
16921	Cupriavidus taiwanensis	1	1	0
18605	cyanobacterium UCYN-A	13	1	12	OG_00095538	OG_00309120	OG_00485977	OG_00486409	OG_00487145	OG_00487174	OG_00487208	OG_00701205	OG_00762512	OG_00778584	OG_00801347	OG_00802676
16922	Cyanothece sp. ATCC 51142	2	0	2	OG_00486409	OG_00701205
16923	Cyanothece sp. PCC 7424	2	1	1	OG_00701205
16924	Cyanothece sp. PCC 7425	4	2	2	OG_00486141	OG_00701205
19850	Cyanothece sp. PCC 7822	2	0	2	OG_00700252	OG_00701205
16925	Cyanothece sp. PCC 8801	2	1	1	OG_00701205
16926	Cyanothece sp. PCC 8802	2	1	1	OG_00701205
16927	Cytophaga hutchinsonii ATCC 33406	3	1	2	OG_00486028	OG_00586063
16928	Dechloromonas aromatica RCB	1	1	0
19851	Deferribacter desulfuricans SSM1	1	0	1	OG_00601994
16929	Dehalococcoides ethenogenes 195	20	1	19	OG_00120492	OG_00342722	OG_00372429	OG_00485948	OG_00486027	OG_00486087	OG_00486321	OG_00486366	OG_00486423	OG_00486957	OG_00487008	OG_00499205	OG_00586063	OG_00721630	OG_00763113	OG_00778584	OG_00779047	OG_00802510	OG_00803966
16930	Dehalococcoides sp. BAV1	21	1	20	OG_00120492	OG_00342722	OG_00372429	OG_00485948	OG_00486027	OG_00486087	OG_00486321	OG_00486366	OG_00486423	OG_00486957	OG_00487008	OG_00499205	OG_00586063	OG_00721630	OG_00763113	OG_00778584	OG_00779047	OG_00802510	OG_00803966	OG_00871666
16931	Dehalococcoides sp. CBDB1	20	1	19	OG_00120492	OG_00342722	OG_00372429	OG_00485948	OG_00486027	OG_00486087	OG_00486321	OG_00486366	OG_00486423	OG_00486957	OG_00487008	OG_00499205	OG_00586063	OG_00721630	OG_00763113	OG_00778584	OG_00779047	OG_00802510	OG_00803966
19852	Dehalococcoides sp. GT	21	2	19	OG_00120492	OG_00342722	OG_00372429	OG_00485948	OG_00486027	OG_00486087	OG_00486321	OG_00486366	OG_00486423	OG_00486957	OG_00487008	OG_00499205	OG_00586063	OG_00721630	OG_00763113	OG_00778584	OG_00779047	OG_00802510	OG_00803966
16932	Dehalococcoides sp. VS	21	2	19	OG_00120492	OG_00342722	OG_00372429	OG_00485948	OG_00486027	OG_00486087	OG_00486321	OG_00486366	OG_00486423	OG_00486957	OG_00487008	OG_00499205	OG_00586063	OG_00721630	OG_00763113	OG_00778584	OG_00779047	OG_00802510	OG_00803966
19853	Dehalogenimonas lykanthroporepellens BL-DC-9	20	2	18	OG_00120492	OG_00342722	OG_00372429	OG_00485948	OG_00486027	OG_00486087	OG_00486321	OG_00486366	OG_00486423	OG_00486957	OG_00487008	OG_00586063	OG_00763113	OG_00778584	OG_00779047	OG_00802510	OG_00803966	OG_00804224
16933	Deinococcus deserti VCD115	12	2	10	OG_00485987	OG_00487149	OG_00586063	OG_00763113	OG_00778648	OG_00802794	OG_00803686	OG_00804278	OG_00871557	OG_00871589
16934	Deinococcus geothermalis DSM 11300	12	0	12	OG_00485987	OG_00487149	OG_00586063	OG_00637411	OG_00763113	OG_00778648	OG_00802794	OG_00803686	OG_00804224	OG_00804278	OG_00871557	OG_00871589
16935	Deinococcus radiodurans R1	12	0	12	OG_00485987	OG_00487149	OG_00586063	OG_00637411	OG_00763113	OG_00778648	OG_00802794	OG_00803686	OG_00804224	OG_00804278	OG_00871557	OG_00871589
16936	Delftia acidovorans SPH-1	1	1	0
19854	Denitrovibrio acetiphilus DSM 12809	1	0	1	OG_00601994
19855	Desulfarculus baarsii DSM 2075	1	0	1	OG_00084244
16937	Desulfatibacillum alkenivorans AK-01	4	2	2	OG_00601994	OG_00803028
16938	Desulfitobacterium hafniense DCB-2	3	3	0
16939	Desulfitobacterium hafniense Y51	4	4	0
16940	Desulfobacterium autotrophicum HRM2	4	0	4	OG_00084244	OG_00601994	OG_00803028	OG_00804278
16941	Desulfococcus oleovorans Hxd3	3	1	2	OG_00084244	OG_00601994
16942	Desulfohalobium retbaense DSM 5692	3	1	2	OG_00487020	OG_00803028
16943	Desulfomicrobium baculatum DSM 4028	3	1	2	OG_00487020	OG_00803028
16944	Desulfotalea psychrophila LSv54	11	2	9	OG_00084320	OG_00084366	OG_00485977	OG_00486761	OG_00601994	OG_00687521	OG_00732074	OG_00803028	OG_00804133
16945	Desulfotomaculum acetoxidans DSM 771	5	4	1	OG_00776156
16946	Desulfotomaculum reducens MI-1	6	5	1	OG_00776156
16947	Desulfovibrio desulfuricans subsp. desulfuricans str. ATCC 27774	5	2	3	OG_00486122	OG_00487020	OG_00763889
16948	Desulfovibrio desulfuricans subsp. desulfuricans str. G20	4	1	3	OG_00487020	OG_00763889	OG_00803028
16949	Desulfovibrio magneticus RS-1	4	1	3	OG_00487020	OG_00763889	OG_00803028
16950	Desulfovibrio salexigens DSM 2638	3	1	2	OG_00487020	OG_00803028
16951	Desulfovibrio vulgaris DP4	4	0	4	OG_00084244	OG_00487020	OG_00763889	OG_00803028
19856	Desulfovibrio vulgaris RCH1	4	1	3	OG_00487020	OG_00763889	OG_00803028
16953	Desulfovibrio vulgaris str. Hildenborough	4	1	3	OG_00487020	OG_00763889	OG_00803028
16952	Desulfovibrio vulgaris str. 'Miyazaki F'	4	0	4	OG_00084244	OG_00487020	OG_00763889	OG_00803028
19857	Desulfurivibrio alkaliphilus AHT2	4	2	2	OG_00084244	OG_00601994
16956	Dichelobacter nodosus VCS1703A	3	2	1	OG_00801347
16960	Dictyoglomus thermophilum H-6-12	4	0	4	OG_00372429	OG_00487027	OG_00605287	OG_00721630
16961	Dictyoglomus turgidum DSM 6724	4	0	4	OG_00372429	OG_00487027	OG_00605287	OG_00721630
16963	Dyadobacter fermentans DSM 18053	3	1	2	OG_00486028	OG_00586063
16964	Edwardsiella ictaluri 93-146	4	4	0
16965	Edwardsiella tarda EIB202	3	3	0
16966	Eggerthella lenta DSM 2243	5	2	3	OG_00085192	OG_00120492	OG_00486141
16967	Ehrlichia canis str. Jake	21	0	21	OG_00084366	OG_00085192	OG_00136158	OG_00342722	OG_00372429	OG_00379159	OG_00485948	OG_00486087	OG_00486197	OG_00486423	OG_00487008	OG_00487272	OG_00497785	OG_00499205	OG_00499434	OG_00582020	OG_00636131	OG_00762512	OG_00763889	OG_00803265	OG_00803966
16968	Ehrlichia chaffeensis str. Arkansas	21	0	21	OG_00084366	OG_00085192	OG_00136158	OG_00342722	OG_00372429	OG_00379159	OG_00485948	OG_00486087	OG_00486197	OG_00486423	OG_00487008	OG_00487272	OG_00497785	OG_00499205	OG_00499434	OG_00582020	OG_00636131	OG_00762512	OG_00763889	OG_00803265	OG_00803966
16969	Ehrlichia ruminantium str. Gardel	21	0	21	OG_00084366	OG_00085192	OG_00136158	OG_00342722	OG_00372429	OG_00379159	OG_00485948	OG_00486087	OG_00486197	OG_00486423	OG_00487008	OG_00487272	OG_00497785	OG_00499205	OG_00499434	OG_00582020	OG_00636131	OG_00762512	OG_00763889	OG_00803265	OG_00803966
16970	Ehrlichia ruminantium str. Welgevonden	21	0	21	OG_00084366	OG_00085192	OG_00136158	OG_00342722	OG_00372429	OG_00379159	OG_00485948	OG_00486087	OG_00486197	OG_00486423	OG_00487008	OG_00487272	OG_00497785	OG_00499205	OG_00499434	OG_00582020	OG_00636131	OG_00762512	OG_00763889	OG_00803265	OG_00803966
16971	Ehrlichia ruminantium str. Welgevonden	21	0	21	OG_00084366	OG_00085192	OG_00136158	OG_00342722	OG_00372429	OG_00379159	OG_00485948	OG_00486087	OG_00486197	OG_00486423	OG_00487008	OG_00487272	OG_00497785	OG_00499205	OG_00499434	OG_00582020	OG_00636131	OG_00762512	OG_00763889	OG_00803265	OG_00803966
16972	Elusimicrobium minutum Pei191	10	0	10	OG_00084366	OG_00486027	OG_00486366	OG_00486957	OG_00582023	OG_00601994	OG_00721630	OG_00775806	OG_00802487	OG_00804224
19862	Enterobacter cloacae subsp. cloacae NCTC 9394	25	22	3	OG_00474144	OG_00486659	OG_00871433
16974	Enterococcus faecalis V583	6	6	0
19863	Enterococcus sp. 7L76	34	28	6	OG_00085192	OG_00086231	OG_00372429	OG_00485818	OG_00487096	OG_00871666
19867	Erwinia pyrifoliae DSM 12163	4	3	1	OG_00487053
19868	Erwinia pyrifoliae Ep1/96	2	2	0
19869	Erwinia sp. Ejp617	1	1	0
16976	Erwinia tasmaniensis Et1/99	1	1	0
19870	Escherichia coli 042	1	1	0
16978	Escherichia coli 536	1	0	1	OG_00792356
16979	Escherichia coli 55989	1	1	0
19871	Escherichia coli ABU 83972	2	2	0
16980	Escherichia coli APEC O1	10	10	0
16982	Escherichia coli B str. REL606	1	1	0
16985	Escherichia coli CFT073	5	2	3	OG_00802676	OG_00804544	OG_00871578
16986	Escherichia coli E24377A	2	2	0
16987	Escherichia coli ED1a	1	1	0
16989	Escherichia coli IAI1	1	1	0
16990	Escherichia coli IAI39	1	1	0
16995	Escherichia coli O157:H7 str. EC4115	1	1	0
16999	Escherichia coli S88	1	1	0
17004	Escherichia coli str. K-12 substr. DH10B	7	7	0
17002	Escherichia coli UMN026	1	1	0
19879	Escherichia coli UM146	1	0	1	OG_00871756
17007	Escherichia fergusonii ATCC 35469	1	1	0
19881	Ethanoligenens harbinense YUAN-3	12	4	8	OG_00095538	OG_00485987	OG_00487149	OG_00764199	OG_00776156	OG_00778648	OG_00802794	OG_00871589
19882	Eubacterium cylindroides T2-87	52	14	38	OG_00095538	OG_00474144	OG_00485818	OG_00486087	OG_00486141	OG_00486209	OG_00486222	OG_00486238	OG_00486321	OG_00486366	OG_00486423	OG_00486659	OG_00486663	OG_00486754	OG_00487027	OG_00487043	OG_00487053	OG_00487083	OG_00487208	OG_00499205	OG_00586063	OG_00601994	OG_00636131	OG_00637411	OG_00698526	OG_00732074	OG_00778584	OG_00802410	OG_00802510	OG_00803130	OG_00803183	OG_00803686	OG_00804133	OG_00804278	OG_00804286	OG_00828057	OG_00844379	OG_00871433
17008	Eubacterium eligens ATCC 27750	8	6	2	OG_00486222	OG_00776156
19883	Eubacterium limosum KIST612	11	4	7	OG_00095538	OG_00485987	OG_00487149	OG_00776156	OG_00778648	OG_00802794	OG_00871589
17009	Eubacterium rectale ATCC 33656	9	7	2	OG_00776156	OG_00802959
19884	Eubacterium rectale DSM 17629	20	16	4	OG_00486225	OG_00486357	OG_00776156	OG_00804698
19885	Eubacterium rectale M104/1	21	17	4	OG_00486225	OG_00486357	OG_00776156	OG_00804698
19886	Eubacterium siraeum	29	21	8	OG_00095538	OG_00483928	OG_00485818	OG_00486087	OG_00486357	OG_00721630	OG_00776156	OG_00803071
19887	Eubacterium siraeum V10Sc8a	32	24	8	OG_00483928	OG_00485818	OG_00486087	OG_00486357	OG_00721630	OG_00776156	OG_00803071	OG_00803265
19888	Faecalibacterium prausnitzii	17	15	2	OG_00095538	OG_00871433
19889	Faecalibacterium prausnitzii L2-6	19	14	5	OG_00095538	OG_00487208	OG_00691449	OG_00871433	OG_00871498
17012	Fervidobacterium nodosum Rt17-B1	10	1	9	OG_00084244	OG_00486087	OG_00601994	OG_00605287	OG_00701205	OG_00721630	OG_00776156	OG_00802794	OG_00804133
19892	Fibrobacter succinogenes subsp. succinogenes S85	22	10	12	OG_00279053	OG_00485987	OG_00486357	OG_00487149	OG_00487174	OG_00499205	OG_00687521	OG_00778648	OG_00779047	OG_00802794	OG_00804224	OG_00871589
17013	Fibrobacter succinogenes subsp. succinogenes S85	10	0	10	OG_00279053	OG_00485987	OG_00486357	OG_00487149	OG_00499205	OG_00778648	OG_00779047	OG_00802794	OG_00804224	OG_00871589
17014	Finegoldia magna ATCC 29328	13	5	8	OG_00485987	OG_00487149	OG_00637411	OG_00721630	OG_00776156	OG_00778648	OG_00802794	OG_00871589
17015	Flavobacteriaceae bacterium 3519-10	1	0	1	OG_00586063
17016	Flavobacterium johnsoniae UW101	1	0	1	OG_00586063
17017	Flavobacterium psychrophilum JIP02/86	2	1	1	OG_00586063
17018	Francisella novicida U112	2	0	2	OG_00803071	OG_00804224
17019	Francisella philomiragia subsp. philomiragia ATCC 25017	2	0	2	OG_00803071	OG_00804224
17021	Francisella tularensis subsp. holarctica FTNF002-00	3	0	3	OG_00637411	OG_00803071	OG_00804224
17020	Francisella tularensis subsp. holarctica LVS	4	0	4	OG_00637411	OG_00732074	OG_00803071	OG_00804224
17022	Francisella tularensis subsp. holarctica OSU18	5	0	5	OG_00485948	OG_00637411	OG_00732074	OG_00803071	OG_00804224
17023	Francisella tularensis subsp. mediasiatica FSC147	5	2	3	OG_00637411	OG_00803071	OG_00804224
17024	Francisella tularensis subsp. tularensis FSC198	4	1	3	OG_00637411	OG_00803071	OG_00804224
17661	Francisella tularensis subsp. tularensis NE061598	3	0	3	OG_00637411	OG_00803071	OG_00804224
17025	Francisella tularensis subsp. tularensis SCHU S4	4	1	3	OG_00637411	OG_00803071	OG_00804224
17026	Francisella tularensis subsp. tularensis WY96-3418	4	1	3	OG_00637411	OG_00803071	OG_00804224
17027	Frankia alni ACN14a	2	0	2	OG_00485948	OG_00688306
17028	Frankia sp. CcI3	2	1	1	OG_00485948
17029	Frankia sp. EAN1pec	2	1	1	OG_00763113
19893	Frankia sp. EuI1c	1	0	1	OG_00485948
17030	Fusobacterium nucleatum subsp. nucleatum ATCC 25586	7	0	7	OG_00637411	OG_00701205	OG_00732074	OG_00802543	OG_00802676	OG_00804224	OG_00871498
17031	Gardnerella vaginalis 409-05	19	10	9	OG_00085192	OG_00120621	OG_00486366	OG_00597137	OG_00605287	OG_00637411	OG_00803071	OG_00871498	OG_00871557
19895	Gardnerella vaginalis ATCC 14019	11	1	10	OG_00085192	OG_00120621	OG_00486366	OG_00597137	OG_00605287	OG_00637411	OG_00721630	OG_00803071	OG_00871498	OG_00871557
17032	Gemmatimonas aurantiaca T-27	5	0	5	OG_00486321	OG_00486357	OG_00636131	OG_00779047	OG_00804278
17033	Geobacillus kaustophilus HTA426	1	1	0
19897	Geobacillus sp. Y4.1MC1	1	1	0
17037	Geobacillus thermodenitrificans NG80-2	1	1	0
17038	Geobacter bemidjiensis Bem	3	0	3	OG_00486269	OG_00601994	OG_00779047
17039	Geobacter lovleyi SZ	2	0	2	OG_00486269	OG_00601994
17040	Geobacter metallireducens GS-15	2	0	2	OG_00486269	OG_00601994
17041	Geobacter sp. FRC-32	2	0	2	OG_00486269	OG_00601994
17042	Geobacter sp. M21	2	0	2	OG_00486269	OG_00601994
19898	Geobacter sulfurreducens KN400	3	1	2	OG_00486269	OG_00601994
17043	Geobacter sulfurreducens PCA	5	3	2	OG_00486269	OG_00601994
17044	Geobacter uraniireducens Rf4	3	1	2	OG_00486269	OG_00601994
17045	Gloeobacter violaceus PCC 7421	3	1	2	OG_00700252	OG_00701205
17046	Gluconacetobacter diazotrophicus PAl 5	1	1	0
17047	Gluconacetobacter diazotrophicus PAl 5	1	1	0
17048	Gluconobacter oxydans 621H	1	1	0
17049	Gordonia bronchialis DSM 43247	1	1	0
19899	Gordonibacter pamelaeae 7-10-1-b	76	49	27	OG_00085192	OG_00120492	OG_00120621	OG_00309120	OG_00474144	OG_00485948	OG_00486027	OG_00486028	OG_00486141	OG_00486269	OG_00486357	OG_00486535	OG_00486823	OG_00487076	OG_00487105	OG_00487174	OG_00487309	OG_00499205	OG_00763245	OG_00778584	OG_00778648	OG_00802962	OG_00803686	OG_00803966	OG_00804544	OG_00828057	OG_00871578
17050	Gramella forsetii KT0803	1	0	1	OG_00586063
17051	Granulibacter bethesdensis CGDNIH1	3	2	1	OG_00486761
17052	Haemophilus ducreyi 35000HP	3	1	2	OG_00801347	OG_00871498
17054	Haemophilus influenzae PittEE	12	8	4	OG_00379159	OG_00698526	OG_00700252	OG_00792356
17055	Haemophilus influenzae PittGG	17	13	4	OG_00700252	OG_00763889	OG_00801347	OG_00871666
17056	Haemophilus influenzae Rd KW20	2	1	1	OG_00486238
19905	Halanaerobium praevalens DSM 2228	2	1	1	OG_00776156
19906	Halanaerobium sp. 'sapolanicus'	2	1	1	OG_00776156
17061	Haliangium ochraceum DSM 14365	2	1	1	OG_00486409
19909	Halomonas elongata DSM 2581	1	1	0
17071	Halothermothrix orenii H 168	2	1	1	OG_00721630
17073	Helicobacter acinonychis str. Sheeba	8	1	7	OG_00486269	OG_00497785	OG_00499205	OG_00763889	OG_00802959	OG_00802962	OG_00803028
19910	Helicobacter felis ATCC 49179	8	0	8	OG_00486269	OG_00497785	OG_00499205	OG_00763889	OG_00802959	OG_00802962	OG_00803028	OG_00804133
17074	Helicobacter hepaticus ATCC 51449	5	0	5	OG_00486269	OG_00499205	OG_00763889	OG_00802959	OG_00803028
19911	Helicobacter mustelae 12198	7	2	5	OG_00486269	OG_00497785	OG_00499205	OG_00763889	OG_00803028
17663	Helicobacter pylori	8	2	6	OG_00486222	OG_00486269	OG_00499205	OG_00763889	OG_00802962	OG_00803028
17075	Helicobacter pylori 26695	5	0	5	OG_00486269	OG_00499205	OG_00763889	OG_00802962	OG_00803028
19912	Helicobacter pylori 35A	5	0	5	OG_00486269	OG_00499205	OG_00763889	OG_00802962	OG_00803028
17664	Helicobacter pylori 51	5	0	5	OG_00486269	OG_00499205	OG_00763889	OG_00802962	OG_00803028
19913	Helicobacter pylori 908	7	0	7	OG_00485878	OG_00486269	OG_00487321	OG_00499205	OG_00763889	OG_00802962	OG_00803028
17076	Helicobacter pylori B38	5	0	5	OG_00486269	OG_00499205	OG_00763889	OG_00802962	OG_00803028
19914	Helicobacter pylori B8	6	1	5	OG_00486269	OG_00499205	OG_00763889	OG_00802962	OG_00803028
19915	Helicobacter pylori Cuz20	5	0	5	OG_00486269	OG_00499205	OG_00763889	OG_00802962	OG_00803028
17077	Helicobacter pylori G27	5	0	5	OG_00486269	OG_00499205	OG_00763889	OG_00802962	OG_00803028
17078	Helicobacter pylori HPAG1	5	0	5	OG_00486269	OG_00499205	OG_00763889	OG_00802962	OG_00803028
17079	Helicobacter pylori J99	5	0	5	OG_00486269	OG_00499205	OG_00763889	OG_00802962	OG_00803028
17080	Helicobacter pylori P12	6	0	6	OG_00486269	OG_00499205	OG_00763889	OG_00802959	OG_00802962	OG_00803028
19916	Helicobacter pylori PeCan4	5	0	5	OG_00486269	OG_00499205	OG_00763889	OG_00802962	OG_00803028
19918	Helicobacter pylori Sat464	5	0	5	OG_00486269	OG_00499205	OG_00763889	OG_00802962	OG_00803028
17081	Helicobacter pylori Shi470	5	0	5	OG_00486269	OG_00499205	OG_00763889	OG_00802962	OG_00803028
19917	Helicobacter pylori SJM180	5	0	5	OG_00486269	OG_00499205	OG_00763889	OG_00802962	OG_00803028
19919	Helicobacter pylori v225d	6	0	6	OG_00486269	OG_00499205	OG_00763889	OG_00802959	OG_00802962	OG_00803028
17082	Heliobacterium modesticaldum Ice1	7	5	2	OG_00743491	OG_00776156
19920	Herbaspirillum seropedicae SmR1	1	1	0
17083	Herminiimonas arsenicoxydans	1	0	1	OG_00279053
17084	Herpetosiphon aurantiacus ATCC 23779	4	2	2	OG_00487145	OG_00871557
19921	Hydrogenobacter thermophilus TK-6	7	0	7	OG_00084320	OG_00372429	OG_00487027	OG_00499205	OG_00687521	OG_00701205	OG_00763889
19922	Hydrogenobacter thermophilus TK-6	7	0	7	OG_00084320	OG_00372429	OG_00487027	OG_00499205	OG_00687521	OG_00701205	OG_00763889
17086	Hydrogenobaculum sp. Y04AAS1	6	0	6	OG_00084320	OG_00372429	OG_00687521	OG_00701205	OG_00763889	OG_00779047
19923	Hyphomicrobium denitrificans ATCC 51888	5	5	0
17089	Idiomarina loihiensis L2TR	1	1	0
19925	Ilyobacter polytropus DSM 2926	4	1	3	OG_00701205	OG_00802676	OG_00804224
19926	Intrasporangium calvum DSM 43043	1	1	0
17092	Janthinobacterium sp. Marseille	1	0	1	OG_00279053
17093	Jonesia denitrificans DSM 20603	1	0	1	OG_00688306
17094	Kangiella koreensis DSM 16069	1	0	1	OG_00372429
19927	Ketogulonicigenium vulgare Y25	6	2	4	OG_00084244	OG_00372429	OG_00487027	OG_00802487
17095	Kineococcus radiotolerans SRS30216	1	1	0
17096	Klebsiella pneumoniae 342	3	3	0
19928	Klebsiella pneumoniae NTUH-K2044	1	1	0
17098	Klebsiella pneumoniae subsp. pneumoniae MGH 78578	1	1	0
19929	Klebsiella variicola At-22	1	1	0
17099	Kocuria rhizophila DC2201	3	0	3	OG_00688306	OG_00803071	OG_00804224
17100	Kosmotoga olearia TBF 19.5.1	9	0	9	OG_00084244	OG_00601994	OG_00605287	OG_00701205	OG_00721630	OG_00776156	OG_00802794	OG_00803677	OG_00804133
17101	Kribbella flavida DSM 17836	1	1	0
17102	Kytococcus sedentarius DSM 20547	1	1	0
17103	Lactobacillus acidophilus NCFM	7	1	6	OG_00597137	OG_00721630	OG_00762512	OG_00764199	OG_00778584	OG_00802959
19930	Lactobacillus amylovorus GRL 1112	8	3	5	OG_00597137	OG_00721630	OG_00762512	OG_00764199	OG_00778584
17104	Lactobacillus brevis ATCC 367	8	2	6	OG_00485983	OG_00497785	OG_00637411	OG_00732074	OG_00762512	OG_00764199
17105	Lactobacillus casei ATCC 334	4	3	1	OG_00764199
17106	Lactobacillus casei BL23	3	2	1	OG_00764199
19931	Lactobacillus casei str. Zhang	4	3	1	OG_00764199
19932	Lactobacillus crispatus ST1	7	2	5	OG_00597137	OG_00721630	OG_00762512	OG_00764199	OG_00778584
17107	Lactobacillus delbrueckii subsp. bulgaricus ATCC 11842	7	3	4	OG_00637411	OG_00762512	OG_00764199	OG_00871498
17108	Lactobacillus delbrueckii subsp. bulgaricus ATCC BAA-365	8	3	5	OG_00637411	OG_00762512	OG_00764199	OG_00778584	OG_00871498
19933	Lactobacillus delbrueckii subsp. bulgaricus ND02	8		8	OG_00762512	OG_00764199	OG_00778584	OG_00802959	OG_00871498
19934	Lactobacillus fermentum CECT 5716	87	63	24	OG_00086231	OG_00237963	OG_00483928	OG_00486028	OG_00486222	OG_00486321	OG_00486357	OG_00486423	OG_00487083	OG_00487145	OG_00497785	OG_00499304	OG_00721630	OG_00762512	OG_00764199	OG_00775806	OG_00802794	OG_00802959	OG_00802962	OG_00802986	OG_00804133	OG_00804286	OG_00804698	OG_00828057
17109	Lactobacillus fermentum IFO 3956	6	1	5	OG_00487145	OG_00721630	OG_00762512	OG_00764199	OG_00803249
17110	Lactobacillus gasseri ATCC 33323	8	2	6	OG_00597137	OG_00637411	OG_00721630	OG_00762512	OG_00764199	OG_00778584
17111	Lactobacillus helveticus DPC 4571	11	5	6	OG_00485818	OG_00486357	OG_00721630	OG_00762512	OG_00764199	OG_00778584
19935	Lactobacillus johnsonii FI9785	7	2	5	OG_00597137	OG_00721630	OG_00762512	OG_00764199	OG_00778584
17113	Lactobacillus johnsonii NCC 533	8	1	7	OG_00597137	OG_00637411	OG_00721630	OG_00732074	OG_00762512	OG_00764199	OG_00778584
17114	Lactobacillus plantarum JDM1	2	0	2	OG_00762512	OG_00764199
19936	Lactobacillus plantarum subsp. plantarum ST-III	2	0	2	OG_00762512	OG_00764199
17115	Lactobacillus plantarum WCFS1	3	1	2	OG_00762512	OG_00764199
17116	Lactobacillus reuteri DSM 20016	5	0	5	OG_00474462	OG_00486359	OG_00582023	OG_00762512	OG_00764199
17117	Lactobacillus reuteri JCM 1112	4	1	3	OG_00582023	OG_00762512	OG_00764199
17118	Lactobacillus rhamnosus GG	2	1	1	OG_00764199
19937	Lactobacillus rhamnosus GG	2	1	1	OG_00764199
17119	Lactobacillus rhamnosus Lc 705	3	2	1	OG_00764199
17120	Lactobacillus sakei subsp. sakei 23K	4	1	3	OG_00637411	OG_00732074	OG_00764199
19938	Lactobacillus salivarius CECT 5713	43	34	9	OG_00086231	OG_00762512	OG_00764199	OG_00802794	OG_00802959	OG_00802986	OG_00804018	OG_00804286	OG_00804698
17121	Lactobacillus salivarius UCC118	5	3	2	OG_00762512	OG_00764199
17122	Lactococcus lactis subsp. cremoris MG1363	1	0	1	OG_00085192
19939	Lactococcus lactis subsp. cremoris NZ9000	1	0	1	OG_00085192
17123	Lactococcus lactis subsp. cremoris SK11	4	3	1	OG_00085192
17124	Lactococcus lactis subsp. lactis Il1403	1	0	1	OG_00085192
17125	Lactococcus lactis subsp. lactis KF147	1	0	1	OG_00085192
17126	Laribacter hongkongensis HLHK9	2	1	1	OG_00499205
17127	Lawsonia intracellularis PHE/MN1-00	15	9	6	OG_00487020	OG_00582023	OG_00763889	OG_00776156	OG_00802959	OG_00803028
19940	Leadbetterella byssophila DSM 17132	5	1	4	OG_00485948	OG_00486028	OG_00586063	OG_00803966
19942	Legionella pneumophila 130b	2	2	0
17131	Legionella pneumophila subsp. pneumophila str. Philadelphia 1	2	2	0
17132	Leifsonia xyli subsp. xyli str. CTCB07	3	0	3	OG_00487145	OG_00637411	OG_00871433
17133	Leptospira biflexa serovar Patoc strain 'Patoc 1 (Ames)'	10	0	10	OG_00084366	OG_00120492	OG_00486027	OG_00486028	OG_00486957	OG_00601994	OG_00764224	OG_00779047	OG_00803686	OG_00871557
17134	Leptospira biflexa serovar Patoc strain 'Patoc 1 (Paris)'	10	0	10	OG_00084366	OG_00120492	OG_00486027	OG_00486028	OG_00486957	OG_00601994	OG_00779047	OG_00802959	OG_00803686	OG_00871557
17135	Leptospira borgpetersenii serovar Hardjo-bovis JB197	9	1	8	OG_00084366	OG_00120492	OG_00486027	OG_00486028	OG_00486957	OG_00601994	OG_00779047	OG_00803686
17136	Leptospira borgpetersenii serovar Hardjo-bovis L550	9	1	8	OG_00084366	OG_00120492	OG_00486027	OG_00486028	OG_00486957	OG_00601994	OG_00779047	OG_00803686
17137	Leptospira interrogans serovar Copenhageni str. Fiocruz L1-130	12	2	10	OG_00084366	OG_00120492	OG_00486027	OG_00486028	OG_00486957	OG_00601994	OG_00764076	OG_00775806	OG_00779047	OG_00803686
17138	Leptospira interrogans serovar Lai str. 56601	9	1	8	OG_00084366	OG_00120492	OG_00486027	OG_00486028	OG_00486957	OG_00601994	OG_00779047	OG_00803686
17139	Leptothrix cholodnii SP-6	1	0	1	OG_00279053
17140	Leptotrichia buccalis C-1013-b	1	1	0
17141	Leuconostoc citreum KM20	5	1	4	OG_00120621	OG_00487145	OG_00762512	OG_00764199
19944	Leuconostoc gasicomitatum LMG 18811	6	1	5	OG_00120621	OG_00487145	OG_00762512	OG_00764199	OG_00828262
19945	Leuconostoc kimchii IMSNU 11154	6	1	5	OG_00120621	OG_00487145	OG_00762512	OG_00764199	OG_00828262
17142	Leuconostoc mesenteroides subsp. mesenteroides ATCC 8293	8	3	5	OG_00120621	OG_00487145	OG_00762512	OG_00764199	OG_00828262
17150	Lysinibacillus sphaericus C3-41	5	2	3	OG_00372429	OG_00486948	OG_00487008
17151	Macrococcus caseolyticus JCSC5402	7	7	0
17152	Magnetococcus sp. MC-1	1	0	1	OG_00601994
17153	Magnetospirillum magneticum AMB-1	3	3	0
17154	Mannheimia succiniciproducens MBEL55E	1	1	0
19948	Maribacter sp. HTCC2170	3	2	1	OG_00586063
17155	Maricaulis maris MCS10	1	0	1	OG_00499205
19949	Marivirga tractuosa DSM 4126	3	1	2	OG_00486028	OG_00586063
19950	Megamonas hypermegale	41	31	10	OG_00086231	OG_00483928	OG_00486222	OG_00486357	OG_00586063	OG_00701205	OG_00779047	OG_00802410	OG_00802510	OG_00803265
19951	Meiothermus ruber DSM 1279	12	0	12	OG_00485987	OG_00487149	OG_00586063	OG_00763113	OG_00763889	OG_00778648	OG_00802794	OG_00803686	OG_00804224	OG_00804278	OG_00871557	OG_00871589
19952	Meiothermus silvanus DSM 9946	11	0	11	OG_00485987	OG_00487149	OG_00586063	OG_00763113	OG_00778648	OG_00802794	OG_00803686	OG_00804224	OG_00804278	OG_00871557	OG_00871589
17158	Mesoplasma florum L1	47	0	47	OG_00006771	OG_00085192	OG_00342722	OG_00483928	OG_00485810	OG_00485948	OG_00486087	OG_00486141	OG_00486238	OG_00486366	OG_00486423	OG_00486525	OG_00486948	OG_00487008	OG_00487014	OG_00487083	OG_00487145	OG_00487208	OG_00487272	OG_00497785	OG_00499434	OG_00582020	OG_00582023	OG_00597137	OG_00605287	OG_00637411	OG_00721630	OG_00732074	OG_00743491	OG_00762512	OG_00763113	OG_00763822	OG_00764199	OG_00776156	OG_00778648	OG_00802510	OG_00802794	OG_00803071	OG_00803183	OG_00803677	OG_00803966	OG_00804224	OG_00804286	OG_00828057	OG_00828262
17159	Mesorhizobium loti MAFF303099	4	4	0
17184	Methylacidiphilum infernorum V4	7	1	6	OG_00084244	OG_00486141	OG_00486321	OG_00486357	OG_00636131	OG_00779047
17185	Methylibium petroleiphilum PM1	2	2	0
17187	Methylobacterium chloromethanicum CM4	5	5	0
17188	Methylobacterium extorquens AM1	5	5	0
17189	Methylobacterium extorquens DM4	5	5	0
17190	Methylobacterium extorquens PA1	5	5	0
17191	Methylobacterium nodulans ORS 2060	5	5	0
17192	Methylobacterium populi BJ001	5	5	0
17193	Methylobacterium radiotolerans JCM 2831	6	6	0
17194	Methylobacterium sp. 4-46	5	5	0
17195	Methylocella silvestris BL2	5	5	0
17196	Methylococcus capsulatus str. Bath	1	1	0
17199	Micrococcus luteus NCTC 2665	2	0	2	OG_00688306	OG_00804224
17200	Microcystis aeruginosa NIES-843	3	2	1	OG_00701205
19966	Mobiluncus curtisii ATCC 43063	7	1	6	OG_00085192	OG_00487145	OG_00497785	OG_00597137	OG_00637411	OG_00802543
17201	Moorella thermoacetica ATCC 39073	7	3	4	OG_00372429	OG_00687521	OG_00743491	OG_00804286
19967	Moraxella catarrhalis RH4	1	0	1	OG_00499205
17202	Mycobacterium abscessus ATCC 19977	1	1	0
17203	Mycobacterium avium 104	5	5	0
17204	Mycobacterium avium subsp. paratuberculosis K-10	2	2	0
17205	Mycobacterium bovis AF2122/97	1	1	0
17206	Mycobacterium bovis BCG str. Pasteur 1173P2	1	1	0
17207	Mycobacterium bovis BCG str. Tokyo 172	1	1	0
17208	Mycobacterium gilvum PYR-GCK	1	1	0
17209	Mycobacterium leprae Br4923	6	2	4	OG_00486141	OG_00743491	OG_00762512	OG_00763113
17210	Mycobacterium leprae TN	6	2	4	OG_00486141	OG_00743491	OG_00762512	OG_00763113
17211	Mycobacterium marinum M	1	1	0
17212	Mycobacterium smegmatis str. MC2 155	1	1	0
17213	Mycobacterium sp. JLS	1	1	0
17214	Mycobacterium sp. KMS	1	1	0
17215	Mycobacterium sp. MCS	1	1	0
19968	Mycobacterium sp. Spyr1	1	1	0
17216	Mycobacterium tuberculosis CDC1551	2	2	0
17217	Mycobacterium tuberculosis F11	1	1	0
17218	Mycobacterium tuberculosis H37Ra	1	1	0
17219	Mycobacterium tuberculosis H37Rv	1	1	0
17220	Mycobacterium tuberculosis KZN 1435	1	1	0
17221	Mycobacterium ulcerans Agy99	4	4	0
17222	Mycobacterium vanbaalenii PYR-1	1	1	0
17223	Mycoplasma agalactiae PG2	51	1	50	OG_00006771	OG_00085192	OG_00136158	OG_00342722	OG_00474144	OG_00485948	OG_00486087	OG_00486141	OG_00486197	OG_00486366	OG_00486423	OG_00486525	OG_00486948	OG_00487008	OG_00487014	OG_00487020	OG_00487145	OG_00487208	OG_00487272	OG_00497785	OG_00499434	OG_00582020	OG_00582023	OG_00597137	OG_00605287	OG_00637411	OG_00701205	OG_00721630	OG_00732074	OG_00762512	OG_00763113	OG_00763822	OG_00764199	OG_00775806	OG_00776156	OG_00778648	OG_00801347	OG_00802510	OG_00802794	OG_00803071	OG_00803199	OG_00803249	OG_00803677	OG_00803686	OG_00803966
17224	Mycoplasma arthritidis 158L3-1	51	0	51	OG_00006771	OG_00085192	OG_00136158	OG_00309120	OG_00342722	OG_00485948	OG_00486087	OG_00486141	OG_00486197	OG_00486238	OG_00486366	OG_00486423	OG_00486823	OG_00486948	OG_00487008	OG_00487014	OG_00487020	OG_00487083	OG_00487145	OG_00487208	OG_00487272	OG_00497785	OG_00499434	OG_00582020	OG_00582023	OG_00586063	OG_00597137	OG_00605287	OG_00637411	OG_00701205	OG_00721630	OG_00732074	OG_00762512	OG_00763113	OG_00764199	OG_00775806	OG_00776156	OG_00801347	OG_00802510	OG_00802794	OG_00803071	OG_00803199	OG_00803249	OG_00803677	OG_00803686
19969	Mycoplasma bovis PG45	49	0	49	OG_00006771	OG_00085192	OG_00136158	OG_00342722	OG_00474144	OG_00485948	OG_00486087	OG_00486141	OG_00486197	OG_00486366	OG_00486423	OG_00486948	OG_00487008	OG_00487014	OG_00487020	OG_00487145	OG_00487208	OG_00487272	OG_00497785	OG_00499434	OG_00582020	OG_00582023	OG_00597137	OG_00605287	OG_00637411	OG_00701205	OG_00721630	OG_00732074	OG_00762512	OG_00763113	OG_00763822	OG_00764199	OG_00775806	OG_00776156	OG_00778648	OG_00801347	OG_00802510	OG_00802794	OG_00803071	OG_00803199	OG_00803249	OG_00803677	OG_00803686	OG_00803966	OG_00804224
17225	Mycoplasma capricolum subsp. capricolum ATCC 27343	48	0	48	OG_00006771	OG_00084320	OG_00085192	OG_00342722	OG_00483928	OG_00485810	OG_00485948	OG_00486087	OG_00486141	OG_00486197	OG_00486366	OG_00486423	OG_00486525	OG_00486948	OG_00487008	OG_00487014	OG_00487145	OG_00487208	OG_00487272	OG_00497785	OG_00499434	OG_00582020	OG_00582023	OG_00586063	OG_00605287	OG_00721630	OG_00732074	OG_00743491	OG_00762512	OG_00763113	OG_00763822	OG_00764199	OG_00776156	OG_00778584	OG_00778648	OG_00801347	OG_00802510	OG_00802794	OG_00803071	OG_00803249	OG_00803677	OG_00803966	OG_00804224	OG_00804286	OG_00804361
17226	Mycoplasma conjunctivae HRC/581	56	0	56	OG_00085192	OG_00279053	OG_00309120	OG_00342722	OG_00474144	OG_00485948	OG_00486087	OG_00486141	OG_00486197	OG_00486238	OG_00486366	OG_00486423	OG_00486525	OG_00486535	OG_00486732	OG_00486823	OG_00486948	OG_00487008	OG_00487014	OG_00487020	OG_00487105	OG_00487145	OG_00487174	OG_00487208	OG_00487272	OG_00497785	OG_00499434	OG_00582020	OG_00586063	OG_00597137	OG_00605287	OG_00637411	OG_00701205	OG_00721630	OG_00732074	OG_00762512	OG_00763113	OG_00764199	OG_00775806	OG_00776156	OG_00801347	OG_00802510	OG_00802690	OG_00802794	OG_00802959
19970	Mycoplasma crocodyli MP145	57	3	54	OG_00006771	OG_00085192	OG_00136158	OG_00342722	OG_00474144	OG_00485948	OG_00486087	OG_00486141	OG_00486197	OG_00486366	OG_00486423	OG_00486525	OG_00486637	OG_00486948	OG_00486996	OG_00487008	OG_00487014	OG_00487020	OG_00487145	OG_00487208	OG_00487272	OG_00487321	OG_00497785	OG_00499434	OG_00582020	OG_00582023	OG_00586063	OG_00597137	OG_00605287	OG_00637411	OG_00701205	OG_00721630	OG_00732074	OG_00762512	OG_00763113	OG_00763822	OG_00764199	OG_00775806	OG_00776156	OG_00778648	OG_00801347	OG_00802510	OG_00802794	OG_00803071	OG_00803199
19971	Mycoplasma fermentans JER	53	2	51	OG_00006771	OG_00085192	OG_00342722	OG_00474144	OG_00485948	OG_00486087	OG_00486141	OG_00486197	OG_00486269	OG_00486366	OG_00486423	OG_00486525	OG_00486948	OG_00487008	OG_00487014	OG_00487020	OG_00487145	OG_00487208	OG_00487272	OG_00497785	OG_00499434	OG_00582020	OG_00582023	OG_00597137	OG_00605287	OG_00637411	OG_00701205	OG_00721630	OG_00732074	OG_00762512	OG_00763113	OG_00763822	OG_00764199	OG_00775806	OG_00776156	OG_00778648	OG_00801347	OG_00802510	OG_00802794	OG_00803071	OG_00803199	OG_00803249	OG_00803677	OG_00803686	OG_00803966
19972	Mycoplasma fermentans PG18	52	1	51	OG_00006771	OG_00085192	OG_00342722	OG_00474144	OG_00485948	OG_00486087	OG_00486141	OG_00486197	OG_00486269	OG_00486366	OG_00486423	OG_00486525	OG_00486948	OG_00487008	OG_00487014	OG_00487020	OG_00487145	OG_00487208	OG_00487272	OG_00497785	OG_00499434	OG_00582020	OG_00582023	OG_00597137	OG_00605287	OG_00637411	OG_00701205	OG_00721630	OG_00732074	OG_00762512	OG_00763113	OG_00763822	OG_00764199	OG_00775806	OG_00776156	OG_00778648	OG_00801347	OG_00802510	OG_00802794	OG_00803071	OG_00803199	OG_00803249	OG_00803677	OG_00803686	OG_00803966
17667	Mycoplasma gallisepticum str. F	46	0	46	OG_00084366	OG_00085192	OG_00309120	OG_00342722	OG_00474144	OG_00483928	OG_00485948	OG_00486028	OG_00486087	OG_00486141	OG_00486197	OG_00486357	OG_00486366	OG_00486423	OG_00486869	OG_00486948	OG_00487008	OG_00487020	OG_00487083	OG_00487145	OG_00487272	OG_00487322	OG_00497785	OG_00499304	OG_00499434	OG_00582020	OG_00597137	OG_00605287	OG_00637411	OG_00721630	OG_00732074	OG_00763113	OG_00763822	OG_00764199	OG_00776156	OG_00778584	OG_00801347	OG_00802510	OG_00803071	OG_00803677	OG_00803966	OG_00804224	OG_00804286	OG_00828057	OG_00844379
17668	Mycoplasma gallisepticum str. R(high)	46	0	46	OG_00084366	OG_00085192	OG_00309120	OG_00342722	OG_00474144	OG_00483928	OG_00485948	OG_00486028	OG_00486087	OG_00486141	OG_00486197	OG_00486357	OG_00486366	OG_00486423	OG_00486869	OG_00486948	OG_00487008	OG_00487020	OG_00487083	OG_00487145	OG_00487272	OG_00487322	OG_00497785	OG_00499304	OG_00499434	OG_00582020	OG_00597137	OG_00605287	OG_00637411	OG_00721630	OG_00732074	OG_00763113	OG_00763822	OG_00764199	OG_00776156	OG_00778584	OG_00801347	OG_00802510	OG_00803071	OG_00803677	OG_00803966	OG_00804224	OG_00804286	OG_00828057	OG_00844379
17227	Mycoplasma gallisepticum str. R(low)	46	0	46	OG_00084366	OG_00085192	OG_00309120	OG_00342722	OG_00474144	OG_00483928	OG_00485948	OG_00486028	OG_00486087	OG_00486141	OG_00486197	OG_00486357	OG_00486366	OG_00486423	OG_00486869	OG_00486948	OG_00487008	OG_00487020	OG_00487083	OG_00487145	OG_00487272	OG_00487322	OG_00497785	OG_00499304	OG_00499434	OG_00582020	OG_00597137	OG_00605287	OG_00637411	OG_00721630	OG_00732074	OG_00763113	OG_00763822	OG_00764199	OG_00776156	OG_00778584	OG_00801347	OG_00802510	OG_00803071	OG_00803677	OG_00803966	OG_00804224	OG_00804286	OG_00828057	OG_00844379
17228	Mycoplasma genitalium G37	53	0	53	OG_00006771	OG_00084366	OG_00085192	OG_00120492	OG_00309120	OG_00342722	OG_00485948	OG_00486028	OG_00486087	OG_00486141	OG_00486197	OG_00486269	OG_00486357	OG_00486366	OG_00486423	OG_00486948	OG_00487008	OG_00487020	OG_00487083	OG_00487145	OG_00487208	OG_00487272	OG_00487322	OG_00497785	OG_00499304	OG_00499434	OG_00582020	OG_00582023	OG_00597137	OG_00605287	OG_00637411	OG_00701205	OG_00721630	OG_00732074	OG_00762512	OG_00763113	OG_00764199	OG_00776156	OG_00778584	OG_00801347	OG_00802510	OG_00802543	OG_00802962	OG_00803071	OG_00803249
17229	Mycoplasma hominis	53	0	53	OG_00006771	OG_00085192	OG_00120492	OG_00136158	OG_00309120	OG_00342722	OG_00485948	OG_00486087	OG_00486141	OG_00486197	OG_00486238	OG_00486366	OG_00486423	OG_00486823	OG_00486948	OG_00487008	OG_00487014	OG_00487020	OG_00487083	OG_00487145	OG_00487208	OG_00487272	OG_00497785	OG_00499434	OG_00582020	OG_00582023	OG_00597137	OG_00605287	OG_00637411	OG_00701205	OG_00721630	OG_00732074	OG_00762512	OG_00763113	OG_00763822	OG_00764199	OG_00775806	OG_00776156	OG_00801347	OG_00802510	OG_00802543	OG_00802794	OG_00803071	OG_00803199	OG_00803249
19973	Mycoplasma hyopneumoniae 168	49	0	49	OG_00085192	OG_00136158	OG_00309120	OG_00342722	OG_00474144	OG_00485948	OG_00486087	OG_00486141	OG_00486197	OG_00486366	OG_00486423	OG_00486948	OG_00487008	OG_00487014	OG_00487020	OG_00487083	OG_00487105	OG_00487145	OG_00487208	OG_00487272	OG_00487322	OG_00497785	OG_00499434	OG_00582020	OG_00597137	OG_00605287	OG_00637411	OG_00701205	OG_00721630	OG_00732074	OG_00762512	OG_00763113	OG_00764199	OG_00775806	OG_00776156	OG_00802510	OG_00802794	OG_00803071	OG_00803199	OG_00803249	OG_00803677	OG_00803686	OG_00803966	OG_00804224	OG_00804286
17230	Mycoplasma hyopneumoniae 232	49	0	49	OG_00085192	OG_00136158	OG_00309120	OG_00342722	OG_00474144	OG_00485948	OG_00486087	OG_00486141	OG_00486197	OG_00486366	OG_00486423	OG_00486948	OG_00487008	OG_00487014	OG_00487020	OG_00487083	OG_00487105	OG_00487145	OG_00487208	OG_00487272	OG_00487322	OG_00497785	OG_00499434	OG_00582020	OG_00597137	OG_00605287	OG_00637411	OG_00701205	OG_00721630	OG_00732074	OG_00762512	OG_00763113	OG_00764199	OG_00775806	OG_00776156	OG_00802510	OG_00802794	OG_00803071	OG_00803199	OG_00803249	OG_00803677	OG_00803686	OG_00803966	OG_00804224	OG_00804286
17231	Mycoplasma hyopneumoniae 7448	49	0	49	OG_00085192	OG_00136158	OG_00309120	OG_00342722	OG_00474144	OG_00485948	OG_00486087	OG_00486141	OG_00486197	OG_00486366	OG_00486423	OG_00486948	OG_00487008	OG_00487014	OG_00487020	OG_00487083	OG_00487105	OG_00487145	OG_00487208	OG_00487272	OG_00487322	OG_00497785	OG_00499434	OG_00582020	OG_00597137	OG_00605287	OG_00637411	OG_00701205	OG_00721630	OG_00732074	OG_00762512	OG_00763113	OG_00764199	OG_00775806	OG_00776156	OG_00802510	OG_00802794	OG_00803071	OG_00803199	OG_00803249	OG_00803677	OG_00803686	OG_00803966	OG_00804224	OG_00804286
17232	Mycoplasma hyopneumoniae J	49	0	49	OG_00085192	OG_00136158	OG_00309120	OG_00342722	OG_00474144	OG_00485948	OG_00486087	OG_00486141	OG_00486197	OG_00486366	OG_00486423	OG_00486948	OG_00487008	OG_00487014	OG_00487020	OG_00487083	OG_00487105	OG_00487145	OG_00487208	OG_00487272	OG_00487322	OG_00497785	OG_00499434	OG_00582020	OG_00597137	OG_00605287	OG_00637411	OG_00701205	OG_00721630	OG_00732074	OG_00762512	OG_00763113	OG_00764199	OG_00775806	OG_00776156	OG_00802510	OG_00802794	OG_00803071	OG_00803199	OG_00803249	OG_00803677	OG_00803686	OG_00803966	OG_00804224	OG_00804286
19974	Mycoplasma hyorhinis HUB-1	55	0	55	OG_00006771	OG_00085192	OG_00136158	OG_00309120	OG_00342722	OG_00474144	OG_00485948	OG_00486087	OG_00486141	OG_00486197	OG_00486366	OG_00486423	OG_00486525	OG_00486823	OG_00486948	OG_00487008	OG_00487014	OG_00487020	OG_00487053	OG_00487083	OG_00487145	OG_00487208	OG_00487272	OG_00497785	OG_00499434	OG_00582020	OG_00586063	OG_00597137	OG_00605287	OG_00637411	OG_00701205	OG_00721630	OG_00732074	OG_00762512	OG_00763113	OG_00763822	OG_00764199	OG_00775806	OG_00776156	OG_00778648	OG_00801347	OG_00802510	OG_00802794	OG_00803071	OG_00803199
19975	Mycoplasma leachii PG50	46	0	46	OG_00006771	OG_00085192	OG_00342722	OG_00483928	OG_00485810	OG_00485948	OG_00486087	OG_00486141	OG_00486197	OG_00486366	OG_00486423	OG_00486525	OG_00486948	OG_00487008	OG_00487014	OG_00487145	OG_00487208	OG_00487272	OG_00497785	OG_00499434	OG_00582020	OG_00582023	OG_00586063	OG_00605287	OG_00721630	OG_00732074	OG_00743491	OG_00762512	OG_00763113	OG_00763822	OG_00764199	OG_00776156	OG_00778584	OG_00778648	OG_00801347	OG_00802510	OG_00802794	OG_00803071	OG_00803249	OG_00803677	OG_00803966	OG_00804224	OG_00804286	OG_00828057	OG_00828262
17233	Mycoplasma mobile 163K	49	1	48	OG_00006771	OG_00085192	OG_00136158	OG_00342722	OG_00474144	OG_00485948	OG_00486087	OG_00486141	OG_00486197	OG_00486366	OG_00486423	OG_00486948	OG_00487008	OG_00487014	OG_00487020	OG_00487145	OG_00487208	OG_00487272	OG_00497785	OG_00499434	OG_00582020	OG_00582023	OG_00597137	OG_00605287	OG_00637411	OG_00700773	OG_00701205	OG_00721630	OG_00732074	OG_00743491	OG_00762512	OG_00763113	OG_00764199	OG_00775806	OG_00776156	OG_00802510	OG_00802794	OG_00803071	OG_00803199	OG_00803249	OG_00803677	OG_00803686	OG_00803966	OG_00804224	OG_00804286
13579	Mycoplasma mycoides subsp. capri str. GM12 (deltatypeIIIres clone)	48	0	48	OG_00006771	OG_00085192	OG_00342722	OG_00483928	OG_00485810	OG_00485948	OG_00486087	OG_00486141	OG_00486197	OG_00486366	OG_00486423	OG_00486525	OG_00486948	OG_00487008	OG_00487014	OG_00487145	OG_00487208	OG_00487272	OG_00497785	OG_00499434	OG_00582020	OG_00582023	OG_00586063	OG_00605287	OG_00701205	OG_00721630	OG_00732074	OG_00743491	OG_00762512	OG_00763113	OG_00763822	OG_00764199	OG_00776156	OG_00778584	OG_00778648	OG_00801347	OG_00802510	OG_00802794	OG_00803071	OG_00803249	OG_00803677	OG_00803966	OG_00804224	OG_00804286	OG_00804361
13578	Mycoplasma mycoides subsp. capri str. GM12 (tetM-lacZ clone)	48	0	48	OG_00006771	OG_00085192	OG_00342722	OG_00483928	OG_00485810	OG_00485948	OG_00486087	OG_00486141	OG_00486197	OG_00486366	OG_00486423	OG_00486525	OG_00486948	OG_00487008	OG_00487014	OG_00487145	OG_00487208	OG_00487272	OG_00497785	OG_00499434	OG_00582020	OG_00582023	OG_00586063	OG_00605287	OG_00701205	OG_00721630	OG_00732074	OG_00743491	OG_00762512	OG_00763113	OG_00763822	OG_00764199	OG_00776156	OG_00778584	OG_00778648	OG_00801347	OG_00802510	OG_00802794	OG_00803071	OG_00803249	OG_00803677	OG_00803966	OG_00804224	OG_00804286	OG_00804361
19976	Mycoplasma mycoides subsp. mycoides SC str. Gladysdale	48	0	48	OG_00006771	OG_00085192	OG_00342722	OG_00483928	OG_00485810	OG_00485948	OG_00486087	OG_00486141	OG_00486197	OG_00486366	OG_00486423	OG_00486525	OG_00486948	OG_00487008	OG_00487014	OG_00487145	OG_00487208	OG_00487272	OG_00497785	OG_00499434	OG_00582020	OG_00582023	OG_00586063	OG_00605287	OG_00701205	OG_00721630	OG_00732074	OG_00743491	OG_00762512	OG_00763113	OG_00763822	OG_00764199	OG_00776156	OG_00778584	OG_00778648	OG_00801347	OG_00802510	OG_00802794	OG_00803071	OG_00803249	OG_00803677	OG_00803966	OG_00804224	OG_00804286	OG_00804361
17234	Mycoplasma mycoides subsp. mycoides SC str. PG1	50	1	49	OG_00006771	OG_00085192	OG_00342722	OG_00483928	OG_00485810	OG_00485948	OG_00486087	OG_00486141	OG_00486197	OG_00486366	OG_00486423	OG_00486525	OG_00486948	OG_00487008	OG_00487014	OG_00487145	OG_00487208	OG_00487272	OG_00497785	OG_00499434	OG_00582020	OG_00582023	OG_00586063	OG_00605287	OG_00701205	OG_00721630	OG_00732074	OG_00743491	OG_00762512	OG_00763113	OG_00763822	OG_00764199	OG_00776156	OG_00778584	OG_00778648	OG_00801347	OG_00802510	OG_00802794	OG_00802959	OG_00803071	OG_00803249	OG_00803677	OG_00803966	OG_00804224	OG_00804286
17235	Mycoplasma penetrans HF-2	47	1	46	OG_00006771	OG_00084366	OG_00085192	OG_00120492	OG_00342722	OG_00485948	OG_00485983	OG_00486028	OG_00486087	OG_00486141	OG_00486197	OG_00486357	OG_00486366	OG_00486423	OG_00486525	OG_00487008	OG_00487020	OG_00487145	OG_00487272	OG_00487322	OG_00497785	OG_00582020	OG_00582023	OG_00597137	OG_00605287	OG_00637411	OG_00701205	OG_00721630	OG_00732074	OG_00743491	OG_00763113	OG_00763822	OG_00764199	OG_00776156	OG_00802510	OG_00802794	OG_00803071	OG_00803199	OG_00803966	OG_00804224	OG_00804286	OG_00804797	OG_00828057	OG_00828262	OG_00844379
19977	Mycoplasma pneumoniae FH	59	2	57	OG_00006771	OG_00084366	OG_00085192	OG_00120492	OG_00309120	OG_00342722	OG_00485948	OG_00486028	OG_00486087	OG_00486141	OG_00486197	OG_00486238	OG_00486269	OG_00486357	OG_00486366	OG_00486423	OG_00486823	OG_00486948	OG_00487008	OG_00487020	OG_00487083	OG_00487145	OG_00487208	OG_00487272	OG_00487322	OG_00497785	OG_00499304	OG_00499434	OG_00582020	OG_00582023	OG_00586063	OG_00597137	OG_00605287	OG_00637411	OG_00701205	OG_00721630	OG_00732074	OG_00762512	OG_00763113	OG_00764199	OG_00776156	OG_00778584	OG_00801347	OG_00802510	OG_00802543
17236	Mycoplasma pneumoniae M129	53	0	53	OG_00006771	OG_00084366	OG_00085192	OG_00120492	OG_00309120	OG_00342722	OG_00485948	OG_00486028	OG_00486087	OG_00486141	OG_00486197	OG_00486269	OG_00486357	OG_00486366	OG_00486423	OG_00486948	OG_00487008	OG_00487020	OG_00487083	OG_00487145	OG_00487208	OG_00487272	OG_00487322	OG_00497785	OG_00499304	OG_00499434	OG_00582020	OG_00582023	OG_00586063	OG_00597137	OG_00605287	OG_00637411	OG_00701205	OG_00721630	OG_00732074	OG_00762512	OG_00763113	OG_00764199	OG_00776156	OG_00778584	OG_00801347	OG_00802510	OG_00802543	OG_00802962	OG_00803071
17237	Mycoplasma pulmonis UAB CTIP	48	0	48	OG_00085192	OG_00136158	OG_00309120	OG_00342722	OG_00485948	OG_00486087	OG_00486141	OG_00486197	OG_00486366	OG_00486423	OG_00486525	OG_00486637	OG_00486948	OG_00487008	OG_00487014	OG_00487020	OG_00487145	OG_00487208	OG_00487272	OG_00497785	OG_00499434	OG_00582020	OG_00597137	OG_00605287	OG_00637411	OG_00701205	OG_00721630	OG_00732074	OG_00762512	OG_00763113	OG_00763822	OG_00764199	OG_00775806	OG_00776156	OG_00801347	OG_00802510	OG_00802794	OG_00803071	OG_00803199	OG_00803249	OG_00803677	OG_00803686	OG_00803966	OG_00804224	OG_00804286
17238	Mycoplasma synoviae 53	54	0	54	OG_00085192	OG_00136158	OG_00309120	OG_00342722	OG_00474144	OG_00485948	OG_00486087	OG_00486141	OG_00486197	OG_00486238	OG_00486366	OG_00486423	OG_00486525	OG_00486637	OG_00486948	OG_00487008	OG_00487014	OG_00487020	OG_00487145	OG_00487208	OG_00487272	OG_00487322	OG_00497785	OG_00499434	OG_00582020	OG_00582023	OG_00597137	OG_00605287	OG_00701205	OG_00721630	OG_00732074	OG_00762512	OG_00763113	OG_00763822	OG_00764199	OG_00775806	OG_00776156	OG_00778648	OG_00801347	OG_00802510	OG_00802543	OG_00802794	OG_00803071	OG_00803199	OG_00803249
17239	Myxococcus xanthus DK 1622	1	0	1	OG_00486357
17242	Natranaerobius thermophilus JW/NM-WN-LF	2	1	1	OG_00743491
17244	Nautilia profundicola AmH	6	1	5	OG_00486269	OG_00743491	OG_00763889	OG_00803028	OG_00871756
17245	Neisseria gonorrhoeae FA 1090	2	2	0
17246	Neisseria gonorrhoeae NCCP11945	10	10	0
18592	Neisseria lactamica ST-640	1	0	1
17247	Neisseria meningitidis 053442	1	1	0
19979	Neisseria meningitidis 8013	1	1	0
17251	Neisseria meningitidis alpha14	1	1	0
19980	Neisseria meningitidis alpha710	2	1	1	OG_00486869
17248	Neisseria meningitidis FAM18	1	1	0
17249	Neisseria meningitidis MC58	1	1	0
17250	Neisseria meningitidis Z2491	2	2	0
17252	Neorickettsia risticii str. Illinois	24	0	24	OG_00084366	OG_00085192	OG_00120492	OG_00136158	OG_00342722	OG_00372429	OG_00379159	OG_00485948	OG_00486141	OG_00486197	OG_00486423	OG_00487008	OG_00487272	OG_00497785	OG_00499205	OG_00511719	OG_00636131	OG_00732074	OG_00762512	OG_00763889	OG_00779674	OG_00802794	OG_00803265	OG_00803966
17253	Neorickettsia sennetsu str. Miyayama	24	0	24	OG_00084366	OG_00085192	OG_00120492	OG_00136158	OG_00342722	OG_00372429	OG_00379159	OG_00485948	OG_00486141	OG_00486197	OG_00486423	OG_00487008	OG_00487272	OG_00497785	OG_00499205	OG_00511719	OG_00636131	OG_00732074	OG_00762512	OG_00763889	OG_00779674	OG_00802794	OG_00803265	OG_00803966
17254	Nitratiruptor sp. SB155-2	4	0	4	OG_00486269	OG_00743491	OG_00763889	OG_00803028
17255	Nitrobacter hamburgensis X14	6	6	0
17256	Nitrobacter winogradskyi Nb-255	6	6	0
17258	Nitrosomonas europaea ATCC 19718	2	1	1	OG_00804133
17259	Nitrosomonas eutropha C91	4	3	1	OG_00804133
17261	Nitrosospira multiformis ATCC 25196	1	1	0
17263	Nocardioides sp. JS614	1	1	0
19737	'Nostoc azollae' 0708	4	2	2	OG_00701205	OG_00802676
17264	Nostoc punctiforme PCC 73102	1	0	1	OG_00701205
19984	Oceanithermus profundus DSM 14977	11	0	11	OG_00485987	OG_00487149	OG_00586063	OG_00763113	OG_00778648	OG_00802794	OG_00803686	OG_00804224	OG_00804278	OG_00871557	OG_00871589
17268	Ochrobactrum anthropi ATCC 49188	4	4	0
17269	Oenococcus oeni PSU-1	8	1	7	OG_00120621	OG_00487145	OG_00721630	OG_00762512	OG_00764199	OG_00802510	OG_00828262
17270	Oligotropha carboxidovorans OM5	6	6	0
19985	Olsenella uli DSM 7084	6	2	4	OG_00120492	OG_00486141	OG_00778584	OG_00871498
17271	Onion yellows phytoplasma OY-M	50	1	49	OG_00006771	OG_00084320	OG_00309120	OG_00342722	OG_00483928	OG_00485948	OG_00485987	OG_00486087	OG_00486136	OG_00486141	OG_00486366	OG_00486409	OG_00486423	OG_00486637	OG_00487008	OG_00487020	OG_00487083	OG_00487145	OG_00487149	OG_00487174	OG_00487272	OG_00497785	OG_00499434	OG_00586063	OG_00597137	OG_00605287	OG_00637411	OG_00687521	OG_00700773	OG_00701205	OG_00721630	OG_00732074	OG_00762512	OG_00763113	OG_00778584	OG_00778648	OG_00801347	OG_00802510	OG_00802794	OG_00803071	OG_00803249	OG_00803677	OG_00803686	OG_00803966	OG_00804133
17272	Opitutus terrae PB90-1	6	0	6	OG_00084244	OG_00279053	OG_00486321	OG_00487321	OG_00636131	OG_00779047
17273	Orientia tsutsugamushi str. Boryong	25	2	23	OG_00084366	OG_00085192	OG_00237963	OG_00372429	OG_00379159	OG_00483928	OG_00486136	OG_00486637	OG_00487020	OG_00487083	OG_00487174	OG_00487272	OG_00497785	OG_00499205	OG_00582023	OG_00763113	OG_00763889	OG_00801347	OG_00802543	OG_00803249	OG_00803265	OG_00803677	OG_00828262
17274	Orientia tsutsugamushi str. Ikeda	23	1	22	OG_00084366	OG_00085192	OG_00237963	OG_00372429	OG_00379159	OG_00483928	OG_00486136	OG_00486637	OG_00487020	OG_00487083	OG_00487272	OG_00497785	OG_00499205	OG_00582023	OG_00763113	OG_00763889	OG_00801347	OG_00802543	OG_00803249	OG_00803265	OG_00803677	OG_00828262
19986	Paenibacillus polymyxa E681	1	0	1	OG_00802959
17275	Paenibacillus sp. JDR-2	1	1	0
17035	Paenibacillus sp. Y412MC10	1	1	0
19988	Paludibacter propionicigenes WB4	2	1	1	OG_00586063
17276	Parabacteroides distasonis ATCC 8503	5	3	2	OG_00487272	OG_00586063
17277	Paracoccus denitrificans PD1222	1	1	0
17278	Parvibaculum lavamentivorans DS-1	6	5	1	OG_00804361
19992	Parvularcula bermudensis HTCC2503	1	0	1	OG_00499205
17282	Pectobacterium wasabiae WPP163	1	1	0
17283	Pediococcus pentosaceus ATCC 25745	8	2	6	OG_00487145	OG_00497785	OG_00721630	OG_00762512	OG_00764199	OG_00802487
17284	Pedobacter heparinus DSM 2366	2	1	1	OG_00586063
17285	Pelobacter carbinolicus DSM 2380	2	0	2	OG_00486269	OG_00601994
17286	Pelobacter propionicus DSM 2379	2	0	2	OG_00486269	OG_00601994
17287	Pelodictyon phaeoclathratiforme BU-1	2	1	1	OG_00499205
17288	Pelotomaculum thermopropionicum SI	8	5	3	OG_00743491	OG_00776156	OG_00802959
17289	Persephonella marina EX-H1	2	0	2	OG_00486409	OG_00701205
17290	Petrotoga mobilis SJ95	10	1	9	OG_00084244	OG_00486087	OG_00601994	OG_00605287	OG_00701205	OG_00721630	OG_00776156	OG_00802794	OG_00804133
17292	Photobacterium profundum SS9	1	1	0
17293	Photorhabdus asymbiotica	1	1	0
17296	Pirellula staleyi DSM 6068	10	0	10	OG_00006771	OG_00342722	OG_00485948	OG_00486141	OG_00486321	OG_00486423	OG_00487008	OG_00779047	OG_00803966	OG_00804361
19993	Planctomyces limnophilus DSM 3776	5	0	5	OG_00006771	OG_00486141	OG_00636131	OG_00779047	OG_00804361
17297	Polaromonas naphthalenivorans CJ2	1	1	0
17298	Polaromonas sp. JS666	1	0	1	OG_00279053
17299	Polynucleobacter necessarius subsp. asymbioticus QLW-P1DMWA-1	1	0	1	OG_00279053
17300	Polynucleobacter necessarius subsp. necessarius STIR1	3	2	1	OG_00486269
17301	Porphyromonas gingivalis ATCC 33277	10	2	8	OG_00485987	OG_00487149	OG_00487272	OG_00499205	OG_00586063	OG_00778648	OG_00802794	OG_00871589
17302	Porphyromonas gingivalis W83	14	6	8	OG_00485987	OG_00487149	OG_00487272	OG_00499205	OG_00586063	OG_00778648	OG_00802794	OG_00871589
19994	Prevotella melaninogenica ATCC 25845	4	2	2	OG_00486321	OG_00586063
19995	Prevotella ruminicola 23	3	2	1	OG_00586063
17303	Prochlorococcus marinus str. AS9601	5	3	2	OG_00487027	OG_00701205
17304	Prochlorococcus marinus str. MIT 9211	2	1	1	OG_00701205
17305	Prochlorococcus marinus str. MIT 9215	5	3	2	OG_00487027	OG_00701205
17306	Prochlorococcus marinus str. MIT 9301	5	3	2	OG_00487027	OG_00701205
17307	Prochlorococcus marinus str. MIT 9303	3	1	2	OG_00486409	OG_00701205
17308	Prochlorococcus marinus str. MIT 9312	5	3	2	OG_00487027	OG_00701205
17309	Prochlorococcus marinus str. MIT 9313	3	1	2	OG_00486409	OG_00701205
17310	Prochlorococcus marinus str. MIT 9515	5	3	2	OG_00487027	OG_00701205
17311	Prochlorococcus marinus str. NATL1A	4	3	1	OG_00701205
17312	Prochlorococcus marinus str. NATL2A	4	3	1	OG_00701205
17313	Prochlorococcus marinus subsp. marinus str. CCMP1375	3	2	1	OG_00701205
17314	Prochlorococcus marinus subsp. pastoris str. CCMP1986	5	3	2	OG_00487027	OG_00701205
17315	Propionibacterium acnes KPA171202	1	1	0
19996	Propionibacterium acnes SK137	1	1	0
19997	Propionibacterium freudenreichii subsp. shermanii CIP 103027	3	1	2	OG_00120492	OG_00803071
17316	Prosthecochloris aestuarii DSM 271	2	1	1	OG_00499205
17331	Pseudomonas putida KT2440	4	4	0
17333	Pseudomonas stutzeri A1501	1	1	0
17337	Psychrobacter arcticus 273-4	1	0	1	OG_00499205
17338	Psychrobacter cryohalolentis K5	1	0	1	OG_00499205
17339	Psychrobacter sp. PRwf-1	1	0	1	OG_00499205
17348	Ralstonia eutropha H16	1	0	1	OG_00279053
17349	Ralstonia eutropha JMP134	2	2	0
17351	Ralstonia pickettii 12D	2	2	0
17352	Ralstonia pickettii 12J	1	1	0
17353	Ralstonia solanacearum GMI1000	1	0	1	OG_00279053
17354	Renibacterium salmoninarum ATCC 33209	2	2	0
17355	Rhizobium etli CFN 42	6	5	1	OG_00597137
17356	Rhizobium etli CIAT 652	6	6	0
17357	Rhizobium leguminosarum bv. trifolii WSM1325	4	4	0
17358	Rhizobium leguminosarum bv. trifolii WSM2304	6	6	0
17359	Rhizobium leguminosarum bv. viciae 3841	4	4	0
17368	Rhodoferax ferrireducens T118	1	1	0
20004	Rhodomicrobium vannielii ATCC 17100	5	5	0
17369	Rhodopirellula baltica SH 1	8	0	8	OG_00342722	OG_00485948	OG_00486141	OG_00486321	OG_00486423	OG_00487008	OG_00779047	OG_00803966
17370	Rhodopseudomonas palustris BisA53	6	6	0
17371	Rhodopseudomonas palustris BisB18	6	5	1	OG_00486238
17372	Rhodopseudomonas palustris BisB5	6	6	0
17373	Rhodopseudomonas palustris CGA009	6	6	0
20005	Rhodopseudomonas palustris DX-1	6	5	1	OG_00486238
17374	Rhodopseudomonas palustris HaA2	6	6	0
17375	Rhodopseudomonas palustris TIE-1	6	6	0
17378	Rhodothermus marinus DSM 4252	4	2	2	OG_00120492	OG_00486269
17379	Rickettsia africae ESF-5	18	0	18	OG_00085192	OG_00136158	OG_00372429	OG_00474462	OG_00483928	OG_00486136	OG_00486359	OG_00486996	OG_00487083	OG_00487272	OG_00497785	OG_00499205	OG_00582023	OG_00763113	OG_00763889	OG_00801347	OG_00803249	OG_00803677
17380	Rickettsia akari str. Hartford	19	0	19	OG_00085192	OG_00136158	OG_00372429	OG_00474462	OG_00483928	OG_00486136	OG_00486359	OG_00486996	OG_00487083	OG_00487272	OG_00497785	OG_00499205	OG_00582023	OG_00763113	OG_00763889	OG_00801347	OG_00802543	OG_00803249	OG_00803677
17381	Rickettsia bellii OSU 85-389	21	1	20	OG_00085192	OG_00136158	OG_00372429	OG_00474462	OG_00483928	OG_00486136	OG_00486359	OG_00486996	OG_00487083	OG_00487272	OG_00497785	OG_00499205	OG_00582023	OG_00763113	OG_00763889	OG_00792356	OG_00801347	OG_00803028	OG_00803249	OG_00803677
17382	Rickettsia bellii RML369-C	18	0	18	OG_00085192	OG_00136158	OG_00372429	OG_00474462	OG_00483928	OG_00486136	OG_00486359	OG_00486996	OG_00487083	OG_00487272	OG_00497785	OG_00499205	OG_00582023	OG_00763113	OG_00763889	OG_00801347	OG_00803249	OG_00803677
17383	Rickettsia canadensis str. McKiel	20	0	20	OG_00085192	OG_00136158	OG_00372429	OG_00474462	OG_00483928	OG_00486136	OG_00486359	OG_00486996	OG_00487083	OG_00487272	OG_00497785	OG_00499205	OG_00582023	OG_00636131	OG_00763113	OG_00763889	OG_00801347	OG_00802543	OG_00803249	OG_00803677
17384	Rickettsia conorii str. Malish 7	18	0	18	OG_00085192	OG_00136158	OG_00372429	OG_00474462	OG_00483928	OG_00486136	OG_00486359	OG_00486996	OG_00487083	OG_00487272	OG_00497785	OG_00499205	OG_00582023	OG_00763113	OG_00763889	OG_00801347	OG_00803249	OG_00803677
17385	Rickettsia felis URRWXCal2	18	0	18	OG_00085192	OG_00136158	OG_00372429	OG_00474462	OG_00483928	OG_00486136	OG_00486359	OG_00486996	OG_00487083	OG_00487272	OG_00497785	OG_00499205	OG_00582023	OG_00763113	OG_00763889	OG_00801347	OG_00803249	OG_00803677
17386	Rickettsia massiliae MTU5	18	0	18	OG_00085192	OG_00136158	OG_00372429	OG_00474462	OG_00483928	OG_00486136	OG_00486359	OG_00486996	OG_00487083	OG_00487272	OG_00497785	OG_00499205	OG_00582023	OG_00763113	OG_00763889	OG_00801347	OG_00803249	OG_00803677
17387	Rickettsia peacockii str. Rustic	19	0	19	OG_00085192	OG_00136158	OG_00372429	OG_00474462	OG_00483928	OG_00486136	OG_00486359	OG_00486996	OG_00487083	OG_00487272	OG_00497785	OG_00499205	OG_00582023	OG_00762512	OG_00763113	OG_00763889	OG_00801347	OG_00803249	OG_00803677
20006	Rickettsia prowazekii Rp22	18	0	18	OG_00085192	OG_00136158	OG_00372429	OG_00474462	OG_00483928	OG_00486136	OG_00486359	OG_00486996	OG_00487083	OG_00487272	OG_00497785	OG_00499205	OG_00582023	OG_00763113	OG_00763889	OG_00801347	OG_00803249	OG_00803677
17388	Rickettsia prowazekii str. Madrid E	18	0	18	OG_00085192	OG_00136158	OG_00372429	OG_00474462	OG_00483928	OG_00486136	OG_00486359	OG_00486996	OG_00487083	OG_00487272	OG_00497785	OG_00499205	OG_00582023	OG_00763113	OG_00763889	OG_00801347	OG_00803249	OG_00803677
17390	Rickettsia rickettsii str. Iowa	19	1	18	OG_00085192	OG_00136158	OG_00372429	OG_00474462	OG_00483928	OG_00486136	OG_00486359	OG_00486996	OG_00487083	OG_00487272	OG_00497785	OG_00499205	OG_00582023	OG_00763113	OG_00763889	OG_00801347	OG_00803249	OG_00803677
17389	Rickettsia rickettsii str. 'Sheila Smith'	19	1	18	OG_00085192	OG_00136158	OG_00372429	OG_00474462	OG_00483928	OG_00486136	OG_00486359	OG_00486996	OG_00487083	OG_00487272	OG_00497785	OG_00499205	OG_00582023	OG_00763113	OG_00763889	OG_00801347	OG_00803249	OG_00803677
17391	Rickettsia typhi str. Wilmington	18	0	18	OG_00085192	OG_00136158	OG_00372429	OG_00474462	OG_00483928	OG_00486136	OG_00486359	OG_00486996	OG_00487083	OG_00487272	OG_00497785	OG_00499205	OG_00582023	OG_00763113	OG_00763889	OG_00801347	OG_00803249	OG_00803677
20007	Riemerella anatipestifer DSM 15868	4	1	3	OG_00497785	OG_00586063	OG_00801347
17392	Robiginitalea biformata HTCC2501	1	0	1	OG_00586063
20008	Roseburia intestinalis	24	18	6	OG_00095538	OG_00486225	OG_00486357	OG_00776156	OG_00804698	OG_00871666
20009	Roseburia intestinalis XB6B4	25	21	4	OG_00486225	OG_00776156	OG_00802959	OG_00805761
17393	Roseiflexus castenholzii DSM 13941	3	3	0
17394	Roseiflexus sp. RS-1	3	3	0
17395	Roseobacter denitrificans OCh 114	2	2	0
20010	Rothia dentocariosa ATCC 17931	3	1	2	OG_00497785	OG_00804224
17396	Rothia mucilaginosa	13	11	2	OG_00497785	OG_00804224
17397	Rubrobacter xylanophilus DSM 9941	2	1	1	OG_00762512
20011	Ruminococcus albus 7	8	5	3	OG_00095538	OG_00721630	OG_00871433
20012	Ruminococcus bromii	34	24	10	OG_00485987	OG_00487020	OG_00487149	OG_00743491	OG_00776156	OG_00778648	OG_00802794	OG_00802959	OG_00804698	OG_00871589
20013	Ruminococcus obeum	28	20	8	OG_00485818	OG_00486225	OG_00486357	OG_00776156	OG_00804544	OG_00804698	OG_00871498	OG_00871666
20014	Ruminococcus sp.	29	20	9	OG_00095538	OG_00485818	OG_00486225	OG_00486357	OG_00776156	OG_00802410	OG_00804544	OG_00804698	OG_00871498
20015	Ruminococcus sp. 18P13	27	20	7	OG_00095538	OG_00483928	OG_00487020	OG_00487174	OG_00776156	OG_00777384	OG_00871666
20016	Ruminococcus torques	20	14	6	OG_00485818	OG_00486225	OG_00486356	OG_00486357	OG_00776156	OG_00804698
17400	Saccharomonospora viridis DSM 43017	1	1	0
17403	Salinibacter ruber DSM 13855	6	3	3	OG_00486366	OG_00700252	OG_00802962
17406	Salmonella enterica subsp. arizonae serovar 62:z4,z23:-- str. RSK2980	3	3	0
17407	Salmonella enterica subsp. enterica serovar Agona str. SL483	2	2	0
17408	Salmonella enterica subsp. enterica serovar Choleraesuis str. SC-B67	1	1	0
17409	Salmonella enterica subsp. enterica serovar Dublin str. CT_02021853	2	2	0
17412	Salmonella enterica subsp. enterica serovar Heidelberg str. SL476	2	2	0
17413	Salmonella enterica subsp. enterica serovar Newport str. SL254	1	1	0
17416	Salmonella enterica subsp. enterica serovar Paratyphi B str. SPB7	3	3	0
17418	Salmonella enterica subsp. enterica serovar Schwarzengrund str. CVM19633	2	2	0
18594	Salmonella enterica subsp. enterica serovar Typhimurium DT104 NCTC 13348	1	1	0
20019	Sanguibacter keddieii DSM 10542	1	1	0
17422	Sebaldella termitidis ATCC 33386	1	1	0
20020	Segniliparus rotundus DSM 44985	1	0	1	OG_00120492
17433	Shewanella oneidensis MR-1	4	4	0
17438	Shewanella sp. ANA-3	1	1	0
17443	Shigella boydii CDC 3083-94	1	0	1	OG_00487027
17444	Shigella boydii Sb227	1	0	1	OG_00778648
17447	Shigella flexneri 2a str. 301	1	1	0
17448	Shigella flexneri 5 str. 8401	3	3	0
17360	Sinorhizobium fredii NGR234	9	9	0
17450	Sinorhizobium medicae WSM419	5	5	0
17451	Sinorhizobium meliloti 1021	5	5	0
17452	Slackia heliotrinireducens DSM 20476	7	1	6	OG_00085192	OG_00120492	OG_00486141	OG_00499205	OG_00743491	OG_00778584
17453	Sodalis glossinidius str. 'morsitans'	1	1	0
17454	Sorangium cellulosum 'So ce 56'	2	0	2	OG_00486141	OG_00802962
17455	Sphaerobacter thermophilus DSM 20745	4	0	4	OG_00372429	OG_00486409	OG_00586063	OG_00779047
17456	Sphingomonas wittichii RW1	2	1	1	OG_00006771
20025	Spirochaeta smaragdinae DSM 11293	11	1	10	OG_00084366	OG_00483928	OG_00485987	OG_00487043	OG_00487149	OG_00601994	OG_00778648	OG_00802794	OG_00871578	OG_00871589
20026	Spirochaeta thermophila DSM 6192	12	2	10	OG_00483928	OG_00485987	OG_00487043	OG_00487149	OG_00601994	OG_00778584	OG_00778648	OG_00802794	OG_00871578	OG_00871589
17458	Spirosoma linguale DSM 74	3	1	2	OG_00486028	OG_00586063
20027	Stackebrandtia nassauensis DSM 44728	1	0	1	OG_00778584
17459	Staphylococcus aureus RF122	2	2	0
17470	Staphylococcus aureus subsp. aureus NCTC 8325	1	1	0
20034	Staphylococcus aureus subsp. aureus str. JKD6008	1	0	1	OG_00779047
17472	Staphylococcus aureus subsp. aureus USA300_TCH1516	18	17	1	OG_00485983
20037	Starkeya novella DSM 506	5	5	0
20038	Stigmatella aurantiaca DW4/3-1	1	0	1	OG_00486357
17482	Streptobacillus moniliformis DSM 12112	6	1	5	OG_00487272	OG_00597137	OG_00721630	OG_00804224	OG_00871498
17483	Streptococcus agalactiae 2603V/R	1	0	1	OG_00637411
17484	Streptococcus agalactiae A909	1	0	1	OG_00637411
17485	Streptococcus agalactiae NEM316	1	0	1	OG_00637411
17486	Streptococcus dysgalactiae subsp. equisimilis GGS_124	1	0	1	OG_00637411
17487	Streptococcus equi subsp. equi 4047	1	0	1	OG_00637411
17488	Streptococcus equi subsp. zooepidemicus	1	0	1	OG_00637411
17489	Streptococcus equi subsp. zooepidemicus MGCS10565	2	1	1	OG_00637411
17490	Streptococcus gordonii str. Challis substr. CH1	1	1	0
17491	Streptococcus mutans UA159	2	0	2	OG_00486197	OG_00803943
20044	Streptococcus pneumoniae INV104	1	1	0
17499	Streptococcus pneumoniae P1031	1	1	0
17501	Streptococcus pneumoniae TIGR4	2	2	0
17503	Streptococcus pyogenes M1 GAS	3	1	2	OG_00637411	OG_00732074
17504	Streptococcus pyogenes MGAS10270	2	0	2	OG_00637411	OG_00732074
17505	Streptococcus pyogenes MGAS10394	2	0	2	OG_00637411	OG_00732074
17506	Streptococcus pyogenes MGAS10750	2	0	2	OG_00637411	OG_00732074
17507	Streptococcus pyogenes MGAS2096	2	0	2	OG_00637411	OG_00732074
17508	Streptococcus pyogenes MGAS315	2	0	2	OG_00637411	OG_00732074
17509	Streptococcus pyogenes MGAS5005	2	0	2	OG_00637411	OG_00732074
17510	Streptococcus pyogenes MGAS6180	2	0	2	OG_00637411	OG_00732074
17511	Streptococcus pyogenes MGAS8232	2	0	2	OG_00637411	OG_00732074
17512	Streptococcus pyogenes MGAS9429	2	0	2	OG_00637411	OG_00732074
17513	Streptococcus pyogenes NZ131	2	0	2	OG_00637411	OG_00732074
17514	Streptococcus pyogenes SSI-1	2	0	2	OG_00637411	OG_00732074
17515	Streptococcus pyogenes str. Manfredo	2	0	2	OG_00637411	OG_00732074
17519	Streptococcus suis BM407	1	1	0
17523	Streptococcus thermophilus LMD-9	1	1	0
20056	Streptomyces bingchenggensis BCW-1	3	1	2	OG_00487043	OG_00763113
20058	Sulfuricurvum kujiense DSM 16994	3	0	3	OG_00486269	OG_00743491	OG_00763889
17540	Sulfurihydrogenibium azorense Az-Fu1	3	0	3	OG_00486409	OG_00499205	OG_00701205
17541	Sulfurihydrogenibium sp. YO3AOP1	2	0	2	OG_00486409	OG_00701205
20059	Sulfurimonas autotrophica DSM 16294	4	0	4	OG_00486269	OG_00499205	OG_00763889	OG_00804224
17542	Sulfurimonas denitrificans DSM 1251	3	0	3	OG_00486269	OG_00499205	OG_00763889
17543	Sulfurospirillum deleyianum DSM 6946	3	0	3	OG_00486269	OG_00763889	OG_00803028
17544	Sulfurovum sp. NBC37-1	3	0	3	OG_00486269	OG_00763889	OG_00803028
17545	Symbiobacterium thermophilum IAM 14863	5	4	1	OG_00586063
17546	Synechococcus elongatus PCC 6301	2	1	1	OG_00701205
17547	Synechococcus elongatus PCC 7942	2	1	1	OG_00701205
17548	Synechococcus sp. CC9311	2	1	1	OG_00701205
17549	Synechococcus sp. CC9605	2	1	1	OG_00701205
17550	Synechococcus sp. CC9902	2	1	1	OG_00701205
17551	Synechococcus sp. JA-2-3B'a(2-13)	2	1	1	OG_00701205
17552	Synechococcus sp. JA-3-3Ab	2	1	1	OG_00701205
17553	Synechococcus sp. PCC 7002	3	1	2	OG_00486409	OG_00701205
17554	Synechococcus sp. RCC307	2	1	1	OG_00701205
17555	Synechococcus sp. WH 7803	2	1	1	OG_00701205
17556	Synechococcus sp. WH 8102	2	1	1	OG_00701205
17557	Synechocystis sp. PCC 6803	3	1	2	OG_00486409	OG_00701205
20060	Synergistetes bacterium SGP1	68	31	37	OG_00086231	OG_00237963	OG_00279053	OG_00483928	OG_00485793	OG_00485818	OG_00485977	OG_00485987	OG_00486028	OG_00486087	OG_00486136	OG_00486238	OG_00486659	OG_00487020	OG_00487083	OG_00487145	OG_00487149	OG_00487321	OG_00636131	OG_00637411	OG_00721630	OG_00763113	OG_00763245	OG_00764199	OG_00764224	OG_00775806	OG_00778584	OG_00778648	OG_00779047	OG_00802410	OG_00802794	OG_00804133	OG_00804224	OG_00804698	OG_00828057	OG_00871578	OG_00871589
17558	Syntrophobacter fumaroxidans MPOB	2	0	2	OG_00084244	OG_00601994
17559	Syntrophomonas wolfei subsp. wolfei str. Goettingen	10	8	2	OG_00372429	OG_00776156
20061	Syntrophothermus lipocalidus DSM 12680	7	5	2	OG_00372429	OG_00776156
17560	Syntrophus aciditrophicus SB	1	1	0
17561	Teredinibacter turnerae T7901	1	1	0
17562	Thauera sp. MZ1T	1	1	0
20062	Thermaerobacter marianensis DSM 12885	8	5	3	OG_00372429	OG_00586063	OG_00743491
17563	Thermanaerovibrio acidaminovorans DSM 6589	12	1	11	OG_00483928	OG_00485987	OG_00487145	OG_00487149	OG_00605287	OG_00637411	OG_00776156	OG_00778648	OG_00802794	OG_00828262	OG_00871589
20063	Thermincola potens JR	8	5	3	OG_00372429	OG_00743491	OG_00776156
20064	Thermoanaerobacter italicus Ab9	5	2	3	OG_00687521	OG_00743491	OG_00804286
20065	Thermoanaerobacter mathranii subsp. mathranii str. A3	14	3	11	OG_00486478	OG_00486751	OG_00487322	OG_00511719	OG_00687521	OG_00743491	OG_00779674	OG_00804068	OG_00804286	OG_00804698	OG_00871789
17564	Thermoanaerobacter pseudethanolicus ATCC 33223	12	4	8	OG_00485987	OG_00487149	OG_00743491	OG_00778584	OG_00778648	OG_00802794	OG_00804286	OG_00871589
20066	Thermoanaerobacter sp. X513	11	4	7	OG_00485987	OG_00487149	OG_00743491	OG_00778648	OG_00802794	OG_00804286	OG_00871589
17565	Thermoanaerobacter sp. X514	12	5	7	OG_00485987	OG_00487149	OG_00743491	OG_00778648	OG_00802794	OG_00804286	OG_00871589
17566	Thermoanaerobacter tengcongensis MB4	7	4	3	OG_00721630	OG_00743491	OG_00804286
20067	Thermoanaerobacterium thermosaccharolyticum DSM 571	6	5	1	OG_00743491
17567	Thermobaculum terrenum ATCC BAA-798	7	0	7	OG_00372429	OG_00487027	OG_00487145	OG_00637411	OG_00763113	OG_00779047	OG_00828057
20070	Thermocrinis albus DSM 14484	8	0	8	OG_00084244	OG_00084320	OG_00372429	OG_00487027	OG_00499205	OG_00687521	OG_00701205	OG_00763889
17573	Thermodesulfovibrio yellowstonii DSM 11347	4	1	3	OG_00601994	OG_00762512	OG_00804278
17575	Thermomicrobium roseum DSM 5159	7	0	7	OG_00372429	OG_00486409	OG_00486423	OG_00487145	OG_00586063	OG_00779047	OG_00802959
20071	Thermosediminibacter oceani DSM 16646	9	3	6	OG_00372429	OG_00586063	OG_00687521	OG_00743491	OG_00779047	OG_00804286
17580	Thermosipho africanus TCF52B	8	0	8	OG_00084244	OG_00486087	OG_00601994	OG_00605287	OG_00701205	OG_00776156	OG_00802794	OG_00804133
17581	Thermosipho melanesiensis BI429	8	0	8	OG_00084244	OG_00486087	OG_00601994	OG_00605287	OG_00701205	OG_00776156	OG_00802794	OG_00804133
17582	Thermosynechococcus elongatus BP-1	3	0	3	OG_00700252	OG_00701205	OG_00804278
17583	Thermotoga lettingae TMO	9	0	9	OG_00084244	OG_00084366	OG_00486087	OG_00601994	OG_00605287	OG_00701205	OG_00721630	OG_00802794	OG_00804133
17584	Thermotoga maritima MSB8	11	2	9	OG_00084244	OG_00486087	OG_00601994	OG_00605287	OG_00701205	OG_00721630	OG_00776156	OG_00802794	OG_00804133
17585	Thermotoga naphthophila RKU-10	11	1	10	OG_00084244	OG_00486087	OG_00601994	OG_00605287	OG_00701205	OG_00721630	OG_00776156	OG_00802510	OG_00802794	OG_00804133
17586	Thermotoga neapolitana DSM 4359	10	0	10	OG_00084244	OG_00084366	OG_00486087	OG_00601994	OG_00605287	OG_00701205	OG_00721630	OG_00776156	OG_00802794	OG_00804133
17587	Thermotoga petrophila RKU-1	10	0	10	OG_00084244	OG_00084366	OG_00486087	OG_00601994	OG_00605287	OG_00701205	OG_00721630	OG_00776156	OG_00802794	OG_00804133
17588	Thermotoga sp. RQ2	10	1	9	OG_00084244	OG_00486087	OG_00601994	OG_00605287	OG_00701205	OG_00721630	OG_00776156	OG_00802794	OG_00804133
17589	Thermus thermophilus HB27	13	2	11	OG_00485987	OG_00487149	OG_00586063	OG_00763113	OG_00763889	OG_00778648	OG_00802794	OG_00803686	OG_00804278	OG_00871557	OG_00871589
17590	Thermus thermophilus HB8	13	1	12	OG_00485987	OG_00487149	OG_00586063	OG_00763113	OG_00763889	OG_00778648	OG_00802794	OG_00803686	OG_00804224	OG_00804278	OG_00871557	OG_00871589
17591	Thioalkalivibrio sp. HL-EbGR7	2	2	0
20074	Thiomonas intermedia K12	2	1	1	OG_00279053
17595	Treponema denticola ATCC 35405	13	0	13	OG_00084366	OG_00485987	OG_00487043	OG_00487149	OG_00487272	OG_00601994	OG_00637411	OG_00732074	OG_00778648	OG_00802794	OG_00871557	OG_00871578	OG_00871589
17596	Treponema pallidum subsp. pallidum SS14	24	1	23	OG_00006771	OG_00084366	OG_00120621	OG_00136158	OG_00309120	OG_00483928	OG_00485987	OG_00487043	OG_00487149	OG_00487208	OG_00499205	OG_00582023	OG_00597137	OG_00601994	OG_00637411	OG_00732074	OG_00778648	OG_00802794	OG_00803249	OG_00803677	OG_00871557	OG_00871578	OG_00871589
20075	Treponema pallidum subsp. pallidum str. Chicago	29	5	24	OG_00006771	OG_00084366	OG_00120621	OG_00136158	OG_00309120	OG_00483928	OG_00485987	OG_00486357	OG_00487043	OG_00487149	OG_00487208	OG_00499205	OG_00582023	OG_00597137	OG_00601994	OG_00637411	OG_00732074	OG_00778648	OG_00802794	OG_00803249	OG_00803677	OG_00871557	OG_00871578	OG_00871589
17597	Treponema pallidum subsp. pallidum str. Nichols	23	0	23	OG_00006771	OG_00084366	OG_00120621	OG_00136158	OG_00309120	OG_00483928	OG_00485987	OG_00487043	OG_00487149	OG_00487208	OG_00499205	OG_00582023	OG_00597137	OG_00601994	OG_00637411	OG_00732074	OG_00778648	OG_00802794	OG_00803249	OG_00803677	OG_00871557	OG_00871578	OG_00871589
17598	Trichodesmium erythraeum IMS101	2	0	2	OG_00700252	OG_00701205
17600	Tropheryma whipplei str. Twist	14	0	14	OG_00084366	OG_00309120	OG_00486141	OG_00486409	OG_00487145	OG_00497785	OG_00605287	OG_00636131	OG_00637411	OG_00688306	OG_00743491	OG_00762512	OG_00804286	OG_00871433
17599	Tropheryma whipplei TW08/27	14	0	14	OG_00084366	OG_00309120	OG_00486141	OG_00486409	OG_00487145	OG_00497785	OG_00605287	OG_00636131	OG_00637411	OG_00688306	OG_00743491	OG_00762512	OG_00804286	OG_00871433
20076	Truepera radiovictrix DSM 17093	10	0	10	OG_00485987	OG_00487149	OG_00586063	OG_00763113	OG_00778648	OG_00802794	OG_00804224	OG_00804278	OG_00871557	OG_00871589
17654	uncultured Termite group 1 bacterium phylotype Rs-D17	14	0	14	OG_00084366	OG_00136158	OG_00486027	OG_00486957	OG_00497785	OG_00721630	OG_00743491	OG_00775806	OG_00778584	OG_00779047	OG_00802510	OG_00802676	OG_00802794	OG_00804224
17601	Ureaplasma parvum serovar 3 str. ATCC 27815	52	0	52	OG_00006771	OG_00084366	OG_00085192	OG_00120492	OG_00309120	OG_00342722	OG_00372429	OG_00485818	OG_00485948	OG_00486028	OG_00486087	OG_00486141	OG_00486197	OG_00486357	OG_00486366	OG_00486423	OG_00486525	OG_00486948	OG_00487008	OG_00487014	OG_00487020	OG_00487083	OG_00487145	OG_00487208	OG_00487272	OG_00487322	OG_00497785	OG_00499434	OG_00582020	OG_00597137	OG_00605287	OG_00637411	OG_00700773	OG_00701205	OG_00721630	OG_00732074	OG_00763113	OG_00763822	OG_00764199	OG_00776156	OG_00801347	OG_00802510	OG_00803071	OG_00803199	OG_00803249
17602	Ureaplasma parvum serovar 3 str. ATCC 700970	52	0	52	OG_00006771	OG_00084366	OG_00085192	OG_00120492	OG_00309120	OG_00342722	OG_00372429	OG_00485818	OG_00485948	OG_00486028	OG_00486087	OG_00486141	OG_00486197	OG_00486357	OG_00486366	OG_00486423	OG_00486525	OG_00486948	OG_00487008	OG_00487014	OG_00487020	OG_00487083	OG_00487145	OG_00487208	OG_00487272	OG_00487322	OG_00497785	OG_00499434	OG_00582020	OG_00597137	OG_00605287	OG_00637411	OG_00700773	OG_00701205	OG_00721630	OG_00732074	OG_00763113	OG_00763822	OG_00764199	OG_00776156	OG_00801347	OG_00802510	OG_00803071	OG_00803199	OG_00803249
17603	Ureaplasma urealyticum serovar 10 str. ATCC 33699	53	0	53	OG_00006771	OG_00084366	OG_00085192	OG_00120492	OG_00309120	OG_00342722	OG_00372429	OG_00485818	OG_00485948	OG_00486028	OG_00486087	OG_00486141	OG_00486197	OG_00486357	OG_00486366	OG_00486423	OG_00486525	OG_00486948	OG_00487008	OG_00487014	OG_00487020	OG_00487083	OG_00487145	OG_00487208	OG_00487272	OG_00487322	OG_00497785	OG_00499434	OG_00582020	OG_00582023	OG_00597137	OG_00605287	OG_00637411	OG_00700773	OG_00701205	OG_00721630	OG_00732074	OG_00763113	OG_00763822	OG_00764199	OG_00776156	OG_00801347	OG_00802510	OG_00803071	OG_00803199
20078	Variovorax paradoxus EPS	1	1	0
17604	Variovorax paradoxus S110	1	1	0
17605	Veillonella parvula DSM 2008	4	2	2	OG_00586063	OG_00804544
17606	Verminephrobacter eiseniae EF01-2	1	0	1	OG_00279053
20084	Vibrio furnissii NCTC 11218	2	1	1	OG_00487053
17613	Vibrio harveyi ATCC BAA-1116	2	2	0
17614	Vibrio parahaemolyticus RIMD 2210633	1	1	0
17616	Vibrio splendidus LGP32	1	0	1	OG_00486359
20086	Waddlia chondrophila WSU 86-1044	4	0	4	OG_00486357	OG_00487083	OG_00636131	OG_00779047
17619	Wigglesworthia glossinidia endosymbiont of Glossina brevipalpis	18	2	16	OG_00084320	OG_00084366	OG_00136158	OG_00279053	OG_00379159	OG_00486141	OG_00486637	OG_00582023	OG_00636131	OG_00687521	OG_00743491	OG_00779047	OG_00802676	OG_00803265	OG_00804133	OG_00828057
17620	Wolbachia endosymbiont of Culex quinquefasciatus Pel	13	1	12	OG_00084366	OG_00136158	OG_00372429	OG_00486197	OG_00497785	OG_00499205	OG_00582023	OG_00636131	OG_00738990	OG_00762512	OG_00763889	OG_00801347
17621	Wolbachia endosymbiont of Drosophila melanogaster	13	1	12	OG_00084366	OG_00136158	OG_00372429	OG_00486197	OG_00497785	OG_00499205	OG_00582023	OG_00636131	OG_00738990	OG_00762512	OG_00763889	OG_00801347
17622	Wolbachia endosymbiont strain TRS of Brugia malayi	17	2	15	OG_00084366	OG_00136158	OG_00237963	OG_00372429	OG_00486141	OG_00486197	OG_00497785	OG_00499205	OG_00582023	OG_00636131	OG_00738990	OG_00762512	OG_00763889	OG_00778584	OG_00801347
17623	Wolbachia sp. wRi	13	1	12	OG_00084366	OG_00136158	OG_00372429	OG_00486197	OG_00497785	OG_00499205	OG_00582023	OG_00636131	OG_00738990	OG_00762512	OG_00763889	OG_00801347
17624	Wolinella succinogenes DSM 1740	8	2	6	OG_00486269	OG_00499205	OG_00763889	OG_00776156	OG_00802959	OG_00803028
17625	Xanthobacter autotrophicus Py2	5	5	0
17631	Xanthomonas oryzae pv. oryzae KACC10331	6	6	0
17634	Xylanimonas cellulosilytica DSM 15894	1	1	0
20088	Xylella fastidiosa subsp. fastidiosa GB514	6	4	2	OG_00486238	OG_00486269
17640	Yersinia pestis Angola	1	1	0
17674	Yersinia pestis D106004	12	11	1	OG_00802986
17675	Yersinia pestis D182038	15	13	2	OG_00486761	OG_00802986
17643	Yersinia pestis KIM 10	3	3	0
20089	Yersinia pestis Z176003	12	11	1	OG_00802986
20090	Zunongwangia profunda SM-A87	4	3	1	OG_00586063
17651	Zymomonas mobilis subsp. mobilis NCIMB 11163	1	1	0
17652	Zymomonas mobilis subsp. mobilis ZM4	1	1	0
[truncated: 106 more columns]

## Sheet: genomes missing core OG-count
	Total:	9039	2382
	Percentage of OG for which a good hit was found (PROMER):		0.263525
		missing core OGs	found good hits in sequence	could not find a
xBASE genome_id	genome name	(based on annotation)	(six-frame PROMER)	good PROMER hit	List of OGs with no xBASE orthologue and no good PROMER hit
16820	Candidatus Hodgkinia cicadicola Dsem	151	0	151	OG_00006771	OG_00084244	OG_00084320	OG_00084366	OG_00085192	OG_00086231	OG_00095538	OG_00120492	OG_00120621	OG_00136158	OG_00177296	OG_00237963	OG_00279053	OG_00309120	OG_00342722	OG_00372429	OG_00379159	OG_00439379	OG_00474144	OG_00474462	OG_00483928	OG_00485816	OG_00485818	OG_00485899	OG_00485948	OG_00485977	OG_00485983	OG_00485987	OG_00486027	OG_00486028	OG_00486087	OG_00486136	OG_00486141	OG_00486197	OG_00486238	OG_00486269	OG_00486321	OG_00486356	OG_00486357	OG_00486359	OG_00486366	OG_00486423	OG_00486525	OG_00486535	OG_00486637
16817	Candidatus Carsonella ruddii PV	131	0	131	OG_00006771	OG_00084244	OG_00084320	OG_00084366	OG_00085192	OG_00086231	OG_00095538	OG_00120492	OG_00136158	OG_00177296	OG_00279053	OG_00309120	OG_00342722	OG_00372429	OG_00379159	OG_00483928	OG_00485878	OG_00485899	OG_00485948	OG_00485977	OG_00486027	OG_00486028	OG_00486087	OG_00486136	OG_00486141	OG_00486197	OG_00486269	OG_00486321	OG_00486356	OG_00486357	OG_00486359	OG_00486409	OG_00486423	OG_00486535	OG_00486637	OG_00486823	OG_00486957	OG_00486990	OG_00486996	OG_00487008	OG_00487020	OG_00487027	OG_00487043	OG_00487061	OG_00487076
19814	Candidatus Zinderia insecticola CARI	119	0	119	OG_00006771	OG_00084244	OG_00084320	OG_00084366	OG_00085192	OG_00095538	OG_00120492	OG_00136158	OG_00177296	OG_00237963	OG_00279053	OG_00309120	OG_00342722	OG_00372429	OG_00379159	OG_00439379	OG_00474462	OG_00483928	OG_00485878	OG_00485899	OG_00485948	OG_00485983	OG_00485987	OG_00486027	OG_00486028	OG_00486066	OG_00486087	OG_00486136	OG_00486141	OG_00486197	OG_00486269	OG_00486356	OG_00486357	OG_00486359	OG_00486366	OG_00486409	OG_00486423	OG_00486535	OG_00486637	OG_00486694	OG_00486957	OG_00486996	OG_00487008	OG_00487020	OG_00487027
19813	Candidatus Sulcia muelleri DMIN	103	1	102	OG_00084244	OG_00084320	OG_00084366	OG_00095538	OG_00120492	OG_00136158	OG_00177296	OG_00279053	OG_00309120	OG_00342722	OG_00372429	OG_00379159	OG_00439379	OG_00474144	OG_00483928	OG_00485816	OG_00485899	OG_00485948	OG_00485983	OG_00486027	OG_00486028	OG_00486087	OG_00486136	OG_00486141	OG_00486197	OG_00486238	OG_00486269	OG_00486356	OG_00486359	OG_00486409	OG_00486423	OG_00486535	OG_00486637	OG_00486694	OG_00486957	OG_00486996	OG_00487008	OG_00487020	OG_00487027	OG_00487043	OG_00487061	OG_00487083	OG_00487105	OG_00487145	OG_00487174
16831	Candidatus Sulcia muelleri GWSS	101	0	101	OG_00084244	OG_00084320	OG_00084366	OG_00095538	OG_00120492	OG_00136158	OG_00177296	OG_00279053	OG_00309120	OG_00342722	OG_00372429	OG_00379159	OG_00439379	OG_00474144	OG_00483928	OG_00485816	OG_00485899	OG_00485948	OG_00485983	OG_00486027	OG_00486087	OG_00486136	OG_00486141	OG_00486197	OG_00486238	OG_00486269	OG_00486356	OG_00486359	OG_00486409	OG_00486423	OG_00486535	OG_00486637	OG_00486694	OG_00486957	OG_00486996	OG_00487008	OG_00487020	OG_00487027	OG_00487043	OG_00487061	OG_00487083	OG_00487105	OG_00487145	OG_00487174	OG_00487208
16832	Candidatus Sulcia muelleri SMDSEM	97	0	97	OG_00084244	OG_00084320	OG_00084366	OG_00085192	OG_00095538	OG_00120492	OG_00136158	OG_00177296	OG_00279053	OG_00309120	OG_00342722	OG_00372429	OG_00379159	OG_00439379	OG_00474144	OG_00483928	OG_00485818	OG_00485899	OG_00485948	OG_00486027	OG_00486028	OG_00486087	OG_00486136	OG_00486141	OG_00486197	OG_00486269	OG_00486356	OG_00486359	OG_00486366	OG_00486423	OG_00486535	OG_00486637	OG_00486694	OG_00486957	OG_00486996	OG_00487008	OG_00487020	OG_00487027	OG_00487043	OG_00487083	OG_00487145	OG_00487174	OG_00487208	OG_00487272	OG_00487309
19812	Candidatus Sulcia muelleri CARI	88	2	86	OG_00084320	OG_00095538	OG_00120492	OG_00136158	OG_00177296	OG_00279053	OG_00309120	OG_00342722	OG_00372429	OG_00379159	OG_00439379	OG_00483928	OG_00485899	OG_00485948	OG_00486027	OG_00486028	OG_00486087	OG_00486136	OG_00486141	OG_00486197	OG_00486269	OG_00486356	OG_00486359	OG_00486409	OG_00486423	OG_00486535	OG_00486637	OG_00486694	OG_00486957	OG_00486996	OG_00487008	OG_00487020	OG_00487027	OG_00487043	OG_00487083	OG_00487145	OG_00487174	OG_00487208	OG_00487272	OG_00487309	OG_00487322	OG_00497785	OG_00499205	OG_00499304	OG_00499434
16774	Buchnera aphidicola str. Cc (Cinara cedri)	68	4	64	OG_00006771	OG_00084320	OG_00085192	OG_00086231	OG_00136158	OG_00279053	OG_00309120	OG_00342722	OG_00379159	OG_00483928	OG_00485818	OG_00485948	OG_00485977	OG_00485983	OG_00485987	OG_00486087	OG_00486141	OG_00486269	OG_00486321	OG_00486423	OG_00486637	OG_00486694	OG_00487008	OG_00487020	OG_00487043	OG_00487083	OG_00487145	OG_00487149	OG_00487272	OG_00487309	OG_00497785	OG_00499434	OG_00582020	OG_00586063	OG_00601994	OG_00636131	OG_00687521	OG_00701205	OG_00743491	OG_00763113	OG_00764224	OG_00778584	OG_00778648	OG_00779047	OG_00779674
19977	Mycoplasma pneumoniae FH	59	2	57	OG_00006771	OG_00084366	OG_00085192	OG_00120492	OG_00309120	OG_00342722	OG_00485948	OG_00486028	OG_00486087	OG_00486141	OG_00486197	OG_00486238	OG_00486269	OG_00486357	OG_00486366	OG_00486423	OG_00486823	OG_00486948	OG_00487008	OG_00487020	OG_00487083	OG_00487145	OG_00487208	OG_00487272	OG_00487322	OG_00497785	OG_00499304	OG_00499434	OG_00582020	OG_00582023	OG_00586063	OG_00597137	OG_00605287	OG_00637411	OG_00701205	OG_00721630	OG_00732074	OG_00762512	OG_00763113	OG_00764199	OG_00776156	OG_00778584	OG_00801347	OG_00802510	OG_00802543
17226	Mycoplasma conjunctivae HRC/581	56	0	56	OG_00085192	OG_00279053	OG_00309120	OG_00342722	OG_00474144	OG_00485948	OG_00486087	OG_00486141	OG_00486197	OG_00486238	OG_00486366	OG_00486423	OG_00486525	OG_00486535	OG_00486732	OG_00486823	OG_00486948	OG_00487008	OG_00487014	OG_00487020	OG_00487105	OG_00487145	OG_00487174	OG_00487208	OG_00487272	OG_00497785	OG_00499434	OG_00582020	OG_00586063	OG_00597137	OG_00605287	OG_00637411	OG_00701205	OG_00721630	OG_00732074	OG_00762512	OG_00763113	OG_00764199	OG_00775806	OG_00776156	OG_00801347	OG_00802510	OG_00802690	OG_00802794	OG_00802959
19974	Mycoplasma hyorhinis HUB-1	55	0	55	OG_00006771	OG_00085192	OG_00136158	OG_00309120	OG_00342722	OG_00474144	OG_00485948	OG_00486087	OG_00486141	OG_00486197	OG_00486366	OG_00486423	OG_00486525	OG_00486823	OG_00486948	OG_00487008	OG_00487014	OG_00487020	OG_00487053	OG_00487083	OG_00487145	OG_00487208	OG_00487272	OG_00497785	OG_00499434	OG_00582020	OG_00586063	OG_00597137	OG_00605287	OG_00637411	OG_00701205	OG_00721630	OG_00732074	OG_00762512	OG_00763113	OG_00763822	OG_00764199	OG_00775806	OG_00776156	OG_00778648	OG_00801347	OG_00802510	OG_00802794	OG_00803071	OG_00803199
20091	butyrate-producing bacterium SM4/1	102	48	54	OG_00084244	OG_00084320	OG_00136158	OG_00485810	OG_00485816	OG_00485818	OG_00486027	OG_00486028	OG_00486087	OG_00486136	OG_00486269	OG_00486357	OG_00486478	OG_00486535	OG_00486823	OG_00486948	OG_00486996	OG_00487008	OG_00487027	OG_00487043	OG_00487053	OG_00487061	OG_00487105	OG_00487168	OG_00487208	OG_00487309	OG_00487322	OG_00499434	OG_00687521	OG_00698526	OG_00762512	OG_00763948	OG_00764224	OG_00776156	OG_00780165	OG_00793487	OG_00802410	OG_00802487	OG_00802543	OG_00802794	OG_00803071	OG_00803130	OG_00803265	OG_00803966	OG_00804068
19970	Mycoplasma crocodyli MP145	57	3	54	OG_00006771	OG_00085192	OG_00136158	OG_00342722	OG_00474144	OG_00485948	OG_00486087	OG_00486141	OG_00486197	OG_00486366	OG_00486423	OG_00486525	OG_00486637	OG_00486948	OG_00486996	OG_00487008	OG_00487014	OG_00487020	OG_00487145	OG_00487208	OG_00487272	OG_00487321	OG_00497785	OG_00499434	OG_00582020	OG_00582023	OG_00586063	OG_00597137	OG_00605287	OG_00637411	OG_00701205	OG_00721630	OG_00732074	OG_00762512	OG_00763113	OG_00763822	OG_00764199	OG_00775806	OG_00776156	OG_00778648	OG_00801347	OG_00802510	OG_00802794	OG_00803071	OG_00803199
17238	Mycoplasma synoviae 53	54	0	54	OG_00085192	OG_00136158	OG_00309120	OG_00342722	OG_00474144	OG_00485948	OG_00486087	OG_00486141	OG_00486197	OG_00486238	OG_00486366	OG_00486423	OG_00486525	OG_00486637	OG_00486948	OG_00487008	OG_00487014	OG_00487020	OG_00487145	OG_00487208	OG_00487272	OG_00487322	OG_00497785	OG_00499434	OG_00582020	OG_00582023	OG_00597137	OG_00605287	OG_00701205	OG_00721630	OG_00732074	OG_00762512	OG_00763113	OG_00763822	OG_00764199	OG_00775806	OG_00776156	OG_00778648	OG_00801347	OG_00802510	OG_00802543	OG_00802794	OG_00803071	OG_00803199	OG_00803249
17228	Mycoplasma genitalium G37	53	0	53	OG_00006771	OG_00084366	OG_00085192	OG_00120492	OG_00309120	OG_00342722	OG_00485948	OG_00486028	OG_00486087	OG_00486141	OG_00486197	OG_00486269	OG_00486357	OG_00486366	OG_00486423	OG_00486948	OG_00487008	OG_00487020	OG_00487083	OG_00487145	OG_00487208	OG_00487272	OG_00487322	OG_00497785	OG_00499304	OG_00499434	OG_00582020	OG_00582023	OG_00597137	OG_00605287	OG_00637411	OG_00701205	OG_00721630	OG_00732074	OG_00762512	OG_00763113	OG_00764199	OG_00776156	OG_00778584	OG_00801347	OG_00802510	OG_00802543	OG_00802962	OG_00803071	OG_00803249
17229	Mycoplasma hominis	53	0	53	OG_00006771	OG_00085192	OG_00120492	OG_00136158	OG_00309120	OG_00342722	OG_00485948	OG_00486087	OG_00486141	OG_00486197	OG_00486238	OG_00486366	OG_00486423	OG_00486823	OG_00486948	OG_00487008	OG_00487014	OG_00487020	OG_00487083	OG_00487145	OG_00487208	OG_00487272	OG_00497785	OG_00499434	OG_00582020	OG_00582023	OG_00597137	OG_00605287	OG_00637411	OG_00701205	OG_00721630	OG_00732074	OG_00762512	OG_00763113	OG_00763822	OG_00764199	OG_00775806	OG_00776156	OG_00801347	OG_00802510	OG_00802543	OG_00802794	OG_00803071	OG_00803199	OG_00803249
17236	Mycoplasma pneumoniae M129	53	0	53	OG_00006771	OG_00084366	OG_00085192	OG_00120492	OG_00309120	OG_00342722	OG_00485948	OG_00486028	OG_00486087	OG_00486141	OG_00486197	OG_00486269	OG_00486357	OG_00486366	OG_00486423	OG_00486948	OG_00487008	OG_00487020	OG_00487083	OG_00487145	OG_00487208	OG_00487272	OG_00487322	OG_00497785	OG_00499304	OG_00499434	OG_00582020	OG_00582023	OG_00586063	OG_00597137	OG_00605287	OG_00637411	OG_00701205	OG_00721630	OG_00732074	OG_00762512	OG_00763113	OG_00764199	OG_00776156	OG_00778584	OG_00801347	OG_00802510	OG_00802543	OG_00802962	OG_00803071
17603	Ureaplasma urealyticum serovar 10 str. ATCC 33699	53	0	53	OG_00006771	OG_00084366	OG_00085192	OG_00120492	OG_00309120	OG_00342722	OG_00372429	OG_00485818	OG_00485948	OG_00486028	OG_00486087	OG_00486141	OG_00486197	OG_00486357	OG_00486366	OG_00486423	OG_00486525	OG_00486948	OG_00487008	OG_00487014	OG_00487020	OG_00487083	OG_00487145	OG_00487208	OG_00487272	OG_00487322	OG_00497785	OG_00499434	OG_00582020	OG_00582023	OG_00597137	OG_00605287	OG_00637411	OG_00700773	OG_00701205	OG_00721630	OG_00732074	OG_00763113	OG_00763822	OG_00764199	OG_00776156	OG_00801347	OG_00802510	OG_00803071	OG_00803199
16827	Candidatus Phytoplasma mali	53	1	52	OG_00006771	OG_00309120	OG_00342722	OG_00379159	OG_00474462	OG_00483928	OG_00485948	OG_00485987	OG_00486087	OG_00486136	OG_00486141	OG_00486359	OG_00486366	OG_00486409	OG_00486423	OG_00486637	OG_00487008	OG_00487020	OG_00487083	OG_00487145	OG_00487149	OG_00487174	OG_00487272	OG_00497785	OG_00499205	OG_00499434	OG_00586063	OG_00597137	OG_00605287	OG_00636131	OG_00637411	OG_00700773	OG_00701205	OG_00721630	OG_00732074	OG_00762512	OG_00763113	OG_00778584	OG_00778648	OG_00801347	OG_00802510	OG_00802794	OG_00803071	OG_00803249	OG_00803265
17601	Ureaplasma parvum serovar 3 str. ATCC 27815	52	0	52	OG_00006771	OG_00084366	OG_00085192	OG_00120492	OG_00309120	OG_00342722	OG_00372429	OG_00485818	OG_00485948	OG_00486028	OG_00486087	OG_00486141	OG_00486197	OG_00486357	OG_00486366	OG_00486423	OG_00486525	OG_00486948	OG_00487008	OG_00487014	OG_00487020	OG_00487083	OG_00487145	OG_00487208	OG_00487272	OG_00487322	OG_00497785	OG_00499434	OG_00582020	OG_00597137	OG_00605287	OG_00637411	OG_00700773	OG_00701205	OG_00721630	OG_00732074	OG_00763113	OG_00763822	OG_00764199	OG_00776156	OG_00801347	OG_00802510	OG_00803071	OG_00803199	OG_00803249
17602	Ureaplasma parvum serovar 3 str. ATCC 700970	52	0	52	OG_00006771	OG_00084366	OG_00085192	OG_00120492	OG_00309120	OG_00342722	OG_00372429	OG_00485818	OG_00485948	OG_00486028	OG_00486087	OG_00486141	OG_00486197	OG_00486357	OG_00486366	OG_00486423	OG_00486525	OG_00486948	OG_00487008	OG_00487014	OG_00487020	OG_00487083	OG_00487145	OG_00487208	OG_00487272	OG_00487322	OG_00497785	OG_00499434	OG_00582020	OG_00597137	OG_00605287	OG_00637411	OG_00700773	OG_00701205	OG_00721630	OG_00732074	OG_00763113	OG_00763822	OG_00764199	OG_00776156	OG_00801347	OG_00802510	OG_00803071	OG_00803199	OG_00803249
19971	Mycoplasma fermentans JER	53	2	51	OG_00006771	OG_00085192	OG_00342722	OG_00474144	OG_00485948	OG_00486087	OG_00486141	OG_00486197	OG_00486269	OG_00486366	OG_00486423	OG_00486525	OG_00486948	OG_00487008	OG_00487014	OG_00487020	OG_00487145	OG_00487208	OG_00487272	OG_00497785	OG_00499434	OG_00582020	OG_00582023	OG_00597137	OG_00605287	OG_00637411	OG_00701205	OG_00721630	OG_00732074	OG_00762512	OG_00763113	OG_00763822	OG_00764199	OG_00775806	OG_00776156	OG_00778648	OG_00801347	OG_00802510	OG_00802794	OG_00803071	OG_00803199	OG_00803249	OG_00803677	OG_00803686	OG_00803966
19972	Mycoplasma fermentans PG18	52	1	51	OG_00006771	OG_00085192	OG_00342722	OG_00474144	OG_00485948	OG_00486087	OG_00486141	OG_00486197	OG_00486269	OG_00486366	OG_00486423	OG_00486525	OG_00486948	OG_00487008	OG_00487014	OG_00487020	OG_00487145	OG_00487208	OG_00487272	OG_00497785	OG_00499434	OG_00582020	OG_00582023	OG_00597137	OG_00605287	OG_00637411	OG_00701205	OG_00721630	OG_00732074	OG_00762512	OG_00763113	OG_00763822	OG_00764199	OG_00775806	OG_00776156	OG_00778648	OG_00801347	OG_00802510	OG_00802794	OG_00803071	OG_00803199	OG_00803249	OG_00803677	OG_00803686	OG_00803966
17224	Mycoplasma arthritidis 158L3-1	51	0	51	OG_00006771	OG_00085192	OG_00136158	OG_00309120	OG_00342722	OG_00485948	OG_00486087	OG_00486141	OG_00486197	OG_00486238	OG_00486366	OG_00486423	OG_00486823	OG_00486948	OG_00487008	OG_00487014	OG_00487020	OG_00487083	OG_00487145	OG_00487208	OG_00487272	OG_00497785	OG_00499434	OG_00582020	OG_00582023	OG_00586063	OG_00597137	OG_00605287	OG_00637411	OG_00701205	OG_00721630	OG_00732074	OG_00762512	OG_00763113	OG_00764199	OG_00775806	OG_00776156	OG_00801347	OG_00802510	OG_00802794	OG_00803071	OG_00803199	OG_00803249	OG_00803677	OG_00803686
17223	Mycoplasma agalactiae PG2	51	1	50	OG_00006771	OG_00085192	OG_00136158	OG_00342722	OG_00474144	OG_00485948	OG_00486087	OG_00486141	OG_00486197	OG_00486366	OG_00486423	OG_00486525	OG_00486948	OG_00487008	OG_00487014	OG_00487020	OG_00487145	OG_00487208	OG_00487272	OG_00497785	OG_00499434	OG_00582020	OG_00582023	OG_00597137	OG_00605287	OG_00637411	OG_00701205	OG_00721630	OG_00732074	OG_00762512	OG_00763113	OG_00763822	OG_00764199	OG_00775806	OG_00776156	OG_00778648	OG_00801347	OG_00802510	OG_00802794	OG_00803071	OG_00803199	OG_00803249	OG_00803677	OG_00803686	OG_00803966
16689	Aster yellows witches'-broom phytoplasma AYWB	50	0	50	OG_00006771	OG_00084320	OG_00309120	OG_00342722	OG_00483928	OG_00485948	OG_00485987	OG_00486087	OG_00486136	OG_00486141	OG_00486366	OG_00486409	OG_00486423	OG_00486637	OG_00486694	OG_00487008	OG_00487020	OG_00487083	OG_00487145	OG_00487149	OG_00487174	OG_00487272	OG_00497785	OG_00499434	OG_00586063	OG_00597137	OG_00605287	OG_00637411	OG_00687521	OG_00700773	OG_00701205	OG_00721630	OG_00732074	OG_00762512	OG_00763113	OG_00778584	OG_00778648	OG_00801347	OG_00802510	OG_00802794	OG_00803071	OG_00803249	OG_00803677	OG_00803686	OG_00803966
17234	Mycoplasma mycoides subsp. mycoides SC str. PG1	50	1	49	OG_00006771	OG_00085192	OG_00342722	OG_00483928	OG_00485810	OG_00485948	OG_00486087	OG_00486141	OG_00486197	OG_00486366	OG_00486423	OG_00486525	OG_00486948	OG_00487008	OG_00487014	OG_00487145	OG_00487208	OG_00487272	OG_00497785	OG_00499434	OG_00582020	OG_00582023	OG_00586063	OG_00605287	OG_00701205	OG_00721630	OG_00732074	OG_00743491	OG_00762512	OG_00763113	OG_00763822	OG_00764199	OG_00776156	OG_00778584	OG_00778648	OG_00801347	OG_00802510	OG_00802794	OG_00802959	OG_00803071	OG_00803249	OG_00803677	OG_00803966	OG_00804224	OG_00804286
17271	Onion yellows phytoplasma OY-M	50	1	49	OG_00006771	OG_00084320	OG_00309120	OG_00342722	OG_00483928	OG_00485948	OG_00485987	OG_00486087	OG_00486136	OG_00486141	OG_00486366	OG_00486409	OG_00486423	OG_00486637	OG_00487008	OG_00487020	OG_00487083	OG_00487145	OG_00487149	OG_00487174	OG_00487272	OG_00497785	OG_00499434	OG_00586063	OG_00597137	OG_00605287	OG_00637411	OG_00687521	OG_00700773	OG_00701205	OG_00721630	OG_00732074	OG_00762512	OG_00763113	OG_00778584	OG_00778648	OG_00801347	OG_00802510	OG_00802794	OG_00803071	OG_00803249	OG_00803677	OG_00803686	OG_00803966	OG_00804133
16826	Candidatus Phytoplasma australiense	49	0	49	OG_00006771	OG_00084320	OG_00309120	OG_00342722	OG_00485948	OG_00485987	OG_00486087	OG_00486136	OG_00486141	OG_00486366	OG_00486409	OG_00486423	OG_00486637	OG_00486694	OG_00487008	OG_00487020	OG_00487083	OG_00487145	OG_00487149	OG_00487174	OG_00487272	OG_00497785	OG_00499434	OG_00586063	OG_00597137	OG_00605287	OG_00637411	OG_00687521	OG_00700773	OG_00701205	OG_00721630	OG_00732074	OG_00762512	OG_00763113	OG_00778584	OG_00778648	OG_00801347	OG_00802510	OG_00802794	OG_00803071	OG_00803249	OG_00803677	OG_00803686	OG_00803966	OG_00804133
19969	Mycoplasma bovis PG45	49	0	49	OG_00006771	OG_00085192	OG_00136158	OG_00342722	OG_00474144	OG_00485948	OG_00486087	OG_00486141	OG_00486197	OG_00486366	OG_00486423	OG_00486948	OG_00487008	OG_00487014	OG_00487020	OG_00487145	OG_00487208	OG_00487272	OG_00497785	OG_00499434	OG_00582020	OG_00582023	OG_00597137	OG_00605287	OG_00637411	OG_00701205	OG_00721630	OG_00732074	OG_00762512	OG_00763113	OG_00763822	OG_00764199	OG_00775806	OG_00776156	OG_00778648	OG_00801347	OG_00802510	OG_00802794	OG_00803071	OG_00803199	OG_00803249	OG_00803677	OG_00803686	OG_00803966	OG_00804224
19973	Mycoplasma hyopneumoniae 168	49	0	49	OG_00085192	OG_00136158	OG_00309120	OG_00342722	OG_00474144	OG_00485948	OG_00486087	OG_00486141	OG_00486197	OG_00486366	OG_00486423	OG_00486948	OG_00487008	OG_00487014	OG_00487020	OG_00487083	OG_00487105	OG_00487145	OG_00487208	OG_00487272	OG_00487322	OG_00497785	OG_00499434	OG_00582020	OG_00597137	OG_00605287	OG_00637411	OG_00701205	OG_00721630	OG_00732074	OG_00762512	OG_00763113	OG_00764199	OG_00775806	OG_00776156	OG_00802510	OG_00802794	OG_00803071	OG_00803199	OG_00803249	OG_00803677	OG_00803686	OG_00803966	OG_00804224	OG_00804286
17230	Mycoplasma hyopneumoniae 232	49	0	49	OG_00085192	OG_00136158	OG_00309120	OG_00342722	OG_00474144	OG_00485948	OG_00486087	OG_00486141	OG_00486197	OG_00486366	OG_00486423	OG_00486948	OG_00487008	OG_00487014	OG_00487020	OG_00487083	OG_00487105	OG_00487145	OG_00487208	OG_00487272	OG_00487322	OG_00497785	OG_00499434	OG_00582020	OG_00597137	OG_00605287	OG_00637411	OG_00701205	OG_00721630	OG_00732074	OG_00762512	OG_00763113	OG_00764199	OG_00775806	OG_00776156	OG_00802510	OG_00802794	OG_00803071	OG_00803199	OG_00803249	OG_00803677	OG_00803686	OG_00803966	OG_00804224	OG_00804286
17231	Mycoplasma hyopneumoniae 7448	49	0	49	OG_00085192	OG_00136158	OG_00309120	OG_00342722	OG_00474144	OG_00485948	OG_00486087	OG_00486141	OG_00486197	OG_00486366	OG_00486423	OG_00486948	OG_00487008	OG_00487014	OG_00487020	OG_00487083	OG_00487105	OG_00487145	OG_00487208	OG_00487272	OG_00487322	OG_00497785	OG_00499434	OG_00582020	OG_00597137	OG_00605287	OG_00637411	OG_00701205	OG_00721630	OG_00732074	OG_00762512	OG_00763113	OG_00764199	OG_00775806	OG_00776156	OG_00802510	OG_00802794	OG_00803071	OG_00803199	OG_00803249	OG_00803677	OG_00803686	OG_00803966	OG_00804224	OG_00804286
17232	Mycoplasma hyopneumoniae J	49	0	49	OG_00085192	OG_00136158	OG_00309120	OG_00342722	OG_00474144	OG_00485948	OG_00486087	OG_00486141	OG_00486197	OG_00486366	OG_00486423	OG_00486948	OG_00487008	OG_00487014	OG_00487020	OG_00487083	OG_00487105	OG_00487145	OG_00487208	OG_00487272	OG_00487322	OG_00497785	OG_00499434	OG_00582020	OG_00597137	OG_00605287	OG_00637411	OG_00701205	OG_00721630	OG_00732074	OG_00762512	OG_00763113	OG_00764199	OG_00775806	OG_00776156	OG_00802510	OG_00802794	OG_00803071	OG_00803199	OG_00803249	OG_00803677	OG_00803686	OG_00803966	OG_00804224	OG_00804286
17233	Mycoplasma mobile 163K	49	1	48	OG_00006771	OG_00085192	OG_00136158	OG_00342722	OG_00474144	OG_00485948	OG_00486087	OG_00486141	OG_00486197	OG_00486366	OG_00486423	OG_00486948	OG_00487008	OG_00487014	OG_00487020	OG_00487145	OG_00487208	OG_00487272	OG_00497785	OG_00499434	OG_00582020	OG_00582023	OG_00597137	OG_00605287	OG_00637411	OG_00700773	OG_00701205	OG_00721630	OG_00732074	OG_00743491	OG_00762512	OG_00763113	OG_00764199	OG_00775806	OG_00776156	OG_00802510	OG_00802794	OG_00803071	OG_00803199	OG_00803249	OG_00803677	OG_00803686	OG_00803966	OG_00804224	OG_00804286
17225	Mycoplasma capricolum subsp. capricolum ATCC 27343	48	0	48	OG_00006771	OG_00084320	OG_00085192	OG_00342722	OG_00483928	OG_00485810	OG_00485948	OG_00486087	OG_00486141	OG_00486197	OG_00486366	OG_00486423	OG_00486525	OG_00486948	OG_00487008	OG_00487014	OG_00487145	OG_00487208	OG_00487272	OG_00497785	OG_00499434	OG_00582020	OG_00582023	OG_00586063	OG_00605287	OG_00721630	OG_00732074	OG_00743491	OG_00762512	OG_00763113	OG_00763822	OG_00764199	OG_00776156	OG_00778584	OG_00778648	OG_00801347	OG_00802510	OG_00802794	OG_00803071	OG_00803249	OG_00803677	OG_00803966	OG_00804224	OG_00804286	OG_00804361
13579	Mycoplasma mycoides subsp. capri str. GM12 (deltatypeIIIres clone)	48	0	48	OG_00006771	OG_00085192	OG_00342722	OG_00483928	OG_00485810	OG_00485948	OG_00486087	OG_00486141	OG_00486197	OG_00486366	OG_00486423	OG_00486525	OG_00486948	OG_00487008	OG_00487014	OG_00487145	OG_00487208	OG_00487272	OG_00497785	OG_00499434	OG_00582020	OG_00582023	OG_00586063	OG_00605287	OG_00701205	OG_00721630	OG_00732074	OG_00743491	OG_00762512	OG_00763113	OG_00763822	OG_00764199	OG_00776156	OG_00778584	OG_00778648	OG_00801347	OG_00802510	OG_00802794	OG_00803071	OG_00803249	OG_00803677	OG_00803966	OG_00804224	OG_00804286	OG_00804361
13578	Mycoplasma mycoides subsp. capri str. GM12 (tetM-lacZ clone)	48	0	48	OG_00006771	OG_00085192	OG_00342722	OG_00483928	OG_00485810	OG_00485948	OG_00486087	OG_00486141	OG_00486197	OG_00486366	OG_00486423	OG_00486525	OG_00486948	OG_00487008	OG_00487014	OG_00487145	OG_00487208	OG_00487272	OG_00497785	OG_00499434	OG_00582020	OG_00582023	OG_00586063	OG_00605287	OG_00701205	OG_00721630	OG_00732074	OG_00743491	OG_00762512	OG_00763113	OG_00763822	OG_00764199	OG_00776156	OG_00778584	OG_00778648	OG_00801347	OG_00802510	OG_00802794	OG_00803071	OG_00803249	OG_00803677	OG_00803966	OG_00804224	OG_00804286	OG_00804361
19976	Mycoplasma mycoides subsp. mycoides SC str. Gladysdale	48	0	48	OG_00006771	OG_00085192	OG_00342722	OG_00483928	OG_00485810	OG_00485948	OG_00486087	OG_00486141	OG_00486197	OG_00486366	OG_00486423	OG_00486525	OG_00486948	OG_00487008	OG_00487014	OG_00487145	OG_00487208	OG_00487272	OG_00497785	OG_00499434	OG_00582020	OG_00582023	OG_00586063	OG_00605287	OG_00701205	OG_00721630	OG_00732074	OG_00743491	OG_00762512	OG_00763113	OG_00763822	OG_00764199	OG_00776156	OG_00778584	OG_00778648	OG_00801347	OG_00802510	OG_00802794	OG_00803071	OG_00803249	OG_00803677	OG_00803966	OG_00804224	OG_00804286	OG_00804361
17237	Mycoplasma pulmonis UAB CTIP	48	0	48	OG_00085192	OG_00136158	OG_00309120	OG_00342722	OG_00485948	OG_00486087	OG_00486141	OG_00486197	OG_00486366	OG_00486423	OG_00486525	OG_00486637	OG_00486948	OG_00487008	OG_00487014	OG_00487020	OG_00487145	OG_00487208	OG_00487272	OG_00497785	OG_00499434	OG_00582020	OG_00597137	OG_00605287	OG_00637411	OG_00701205	OG_00721630	OG_00732074	OG_00762512	OG_00763113	OG_00763822	OG_00764199	OG_00775806	OG_00776156	OG_00801347	OG_00802510	OG_00802794	OG_00803071	OG_00803199	OG_00803249	OG_00803677	OG_00803686	OG_00803966	OG_00804224	OG_00804286
17158	Mesoplasma florum L1	47	0	47	OG_00006771	OG_00085192	OG_00342722	OG_00483928	OG_00485810	OG_00485948	OG_00486087	OG_00486141	OG_00486238	OG_00486366	OG_00486423	OG_00486525	OG_00486948	OG_00487008	OG_00487014	OG_00487083	OG_00487145	OG_00487208	OG_00487272	OG_00497785	OG_00499434	OG_00582020	OG_00582023	OG_00597137	OG_00605287	OG_00637411	OG_00721630	OG_00732074	OG_00743491	OG_00762512	OG_00763113	OG_00763822	OG_00764199	OG_00776156	OG_00778648	OG_00802510	OG_00802794	OG_00803071	OG_00803183	OG_00803677	OG_00803966	OG_00804224	OG_00804286	OG_00828057	OG_00828262
17235	Mycoplasma penetrans HF-2	47	1	46	OG_00006771	OG_00084366	OG_00085192	OG_00120492	OG_00342722	OG_00485948	OG_00485983	OG_00486028	OG_00486087	OG_00486141	OG_00486197	OG_00486357	OG_00486366	OG_00486423	OG_00486525	OG_00487008	OG_00487020	OG_00487145	OG_00487272	OG_00487322	OG_00497785	OG_00582020	OG_00582023	OG_00597137	OG_00605287	OG_00637411	OG_00701205	OG_00721630	OG_00732074	OG_00743491	OG_00763113	OG_00763822	OG_00764199	OG_00776156	OG_00802510	OG_00802794	OG_00803071	OG_00803199	OG_00803966	OG_00804224	OG_00804286	OG_00804797	OG_00828057	OG_00828262	OG_00844379
17667	Mycoplasma gallisepticum str. F	46	0	46	OG_00084366	OG_00085192	OG_00309120	OG_00342722	OG_00474144	OG_00483928	OG_00485948	OG_00486028	OG_00486087	OG_00486141	OG_00486197	OG_00486357	OG_00486366	OG_00486423	OG_00486869	OG_00486948	OG_00487008	OG_00487020	OG_00487083	OG_00487145	OG_00487272	OG_00487322	OG_00497785	OG_00499304	OG_00499434	OG_00582020	OG_00597137	OG_00605287	OG_00637411	OG_00721630	OG_00732074	OG_00763113	OG_00763822	OG_00764199	OG_00776156	OG_00778584	OG_00801347	OG_00802510	OG_00803071	OG_00803677	OG_00803966	OG_00804224	OG_00804286	OG_00828057	OG_00844379
17668	Mycoplasma gallisepticum str. R(high)	46	0	46	OG_00084366	OG_00085192	OG_00309120	OG_00342722	OG_00474144	OG_00483928	OG_00485948	OG_00486028	OG_00486087	OG_00486141	OG_00486197	OG_00486357	OG_00486366	OG_00486423	OG_00486869	OG_00486948	OG_00487008	OG_00487020	OG_00487083	OG_00487145	OG_00487272	OG_00487322	OG_00497785	OG_00499304	OG_00499434	OG_00582020	OG_00597137	OG_00605287	OG_00637411	OG_00721630	OG_00732074	OG_00763113	OG_00763822	OG_00764199	OG_00776156	OG_00778584	OG_00801347	OG_00802510	OG_00803071	OG_00803677	OG_00803966	OG_00804224	OG_00804286	OG_00828057	OG_00844379
17227	Mycoplasma gallisepticum str. R(low)	46	0	46	OG_00084366	OG_00085192	OG_00309120	OG_00342722	OG_00474144	OG_00483928	OG_00485948	OG_00486028	OG_00486087	OG_00486141	OG_00486197	OG_00486357	OG_00486366	OG_00486423	OG_00486869	OG_00486948	OG_00487008	OG_00487020	OG_00487083	OG_00487145	OG_00487272	OG_00487322	OG_00497785	OG_00499304	OG_00499434	OG_00582020	OG_00597137	OG_00605287	OG_00637411	OG_00721630	OG_00732074	OG_00763113	OG_00763822	OG_00764199	OG_00776156	OG_00778584	OG_00801347	OG_00802510	OG_00803071	OG_00803677	OG_00803966	OG_00804224	OG_00804286	OG_00828057	OG_00844379
19975	Mycoplasma leachii PG50	46	0	46	OG_00006771	OG_00085192	OG_00342722	OG_00483928	OG_00485810	OG_00485948	OG_00486087	OG_00486141	OG_00486197	OG_00486366	OG_00486423	OG_00486525	OG_00486948	OG_00487008	OG_00487014	OG_00487145	OG_00487208	OG_00487272	OG_00497785	OG_00499434	OG_00582020	OG_00582023	OG_00586063	OG_00605287	OG_00721630	OG_00732074	OG_00743491	OG_00762512	OG_00763113	OG_00763822	OG_00764199	OG_00776156	OG_00778584	OG_00778648	OG_00801347	OG_00802510	OG_00802794	OG_00803071	OG_00803249	OG_00803677	OG_00803966	OG_00804224	OG_00804286	OG_00828057	OG_00828262
19791	Buchnera aphidicola str. JF98 (Acyrthosiphon pisum)	58	18	40	OG_00084320	OG_00136158	OG_00309120	OG_00379159	OG_00474144	OG_00486087	OG_00486141	OG_00486222	OG_00486238	OG_00486321	OG_00486356	OG_00486409	OG_00486637	OG_00486694	OG_00487061	OG_00487105	OG_00487168	OG_00487322	OG_00586063	OG_00636131	OG_00687521	OG_00701205	OG_00732074	OG_00762959	OG_00763245	OG_00776156	OG_00792356	OG_00795347	OG_00801347	OG_00803071	OG_00803249	OG_00803265	OG_00803544	OG_00803677	OG_00804068	OG_00804133	OG_00804286	OG_00804361	OG_00828057	OG_00871666
19882	Eubacterium cylindroides T2-87	52	14	38	OG_00095538	OG_00474144	OG_00485818	OG_00486087	OG_00486141	OG_00486209	OG_00486222	OG_00486238	OG_00486321	OG_00486366	OG_00486423	OG_00486659	OG_00486663	OG_00486754	OG_00487027	OG_00487043	OG_00487053	OG_00487083	OG_00487208	OG_00499205	OG_00586063	OG_00601994	OG_00636131	OG_00637411	OG_00698526	OG_00732074	OG_00778584	OG_00802410	OG_00802510	OG_00803130	OG_00803183	OG_00803686	OG_00804133	OG_00804278	OG_00804286	OG_00828057	OG_00844379	OG_00871433
20060	Synergistetes bacterium SGP1	68	31	37	OG_00086231	OG_00237963	OG_00279053	OG_00483928	OG_00485793	OG_00485818	OG_00485977	OG_00485987	OG_00486028	OG_00486087	OG_00486136	OG_00486238	OG_00486659	OG_00487020	OG_00487083	OG_00487145	OG_00487149	OG_00487321	OG_00636131	OG_00637411	OG_00721630	OG_00763113	OG_00763245	OG_00764199	OG_00764224	OG_00775806	OG_00778584	OG_00778648	OG_00779047	OG_00802410	OG_00802794	OG_00804133	OG_00804224	OG_00804698	OG_00828057	OG_00871578	OG_00871589
16773	Buchnera aphidicola str. Bp (Baizongia pistaciae)	36	2	34	OG_00084320	OG_00136158	OG_00279053	OG_00309120	OG_00379159	OG_00483928	OG_00485983	OG_00486141	OG_00486321	OG_00486637	OG_00486694	OG_00487020	OG_00487083	OG_00497785	OG_00586063	OG_00636131	OG_00687521	OG_00701205	OG_00763113	OG_00763245	OG_00764076	OG_00764224	OG_00778584	OG_00801347	OG_00802487	OG_00803028	OG_00803071	OG_00803249	OG_00803265	OG_00803677	OG_00804133	OG_00804361	OG_00804544	OG_00828057
19811	Candidatus Riesia pediculicola USDA	31	2	29	OG_00084320	OG_00084366	OG_00120492	OG_00136158	OG_00279053	OG_00379159	OG_00485987	OG_00486141	OG_00486637	OG_00487149	OG_00497785	OG_00601994	OG_00636131	OG_00687521	OG_00701205	OG_00762512	OG_00764224	OG_00778584	OG_00778648	OG_00779047	OG_00801347	OG_00802410	OG_00802676	OG_00802794	OG_00802962	OG_00803071	OG_00803265	OG_00804133	OG_00871589
19899	Gordonibacter pamelaeae 7-10-1-b	76	49	27	OG_00085192	OG_00120492	OG_00120621	OG_00309120	OG_00474144	OG_00485948	OG_00486027	OG_00486028	OG_00486141	OG_00486269	OG_00486357	OG_00486535	OG_00486823	OG_00487076	OG_00487105	OG_00487174	OG_00487309	OG_00499205	OG_00763245	OG_00778584	OG_00778648	OG_00802962	OG_00803686	OG_00803966	OG_00804544	OG_00828057	OG_00871578
19934	Lactobacillus fermentum CECT 5716	87	63	24	OG_00086231	OG_00237963	OG_00483928	OG_00486028	OG_00486222	OG_00486321	OG_00486357	OG_00486423	OG_00487083	OG_00487145	OG_00497785	OG_00499304	OG_00721630	OG_00762512	OG_00764199	OG_00775806	OG_00802794	OG_00802959	OG_00802962	OG_00802986	OG_00804133	OG_00804286	OG_00804698	OG_00828057
20075	Treponema pallidum subsp. pallidum str. Chicago	29	5	24	OG_00006771	OG_00084366	OG_00120621	OG_00136158	OG_00309120	OG_00483928	OG_00485987	OG_00486357	OG_00487043	OG_00487149	OG_00487208	OG_00499205	OG_00582023	OG_00597137	OG_00601994	OG_00637411	OG_00732074	OG_00778648	OG_00802794	OG_00803249	OG_00803677	OG_00871557	OG_00871578	OG_00871589
16815	Candidatus Blochmannia floridanus	24	0	24	OG_00084244	OG_00084320	OG_00084366	OG_00120492	OG_00136158	OG_00279053	OG_00379159	OG_00486141	OG_00486694	OG_00487020	OG_00487083	OG_00487272	OG_00636131	OG_00687521	OG_00762512	OG_00763113	OG_00764224	OG_00778584	OG_00779047	OG_00801347	OG_00802676	OG_00803265	OG_00804133	OG_00828057
17252	Neorickettsia risticii str. Illinois	24	0	24	OG_00084366	OG_00085192	OG_00120492	OG_00136158	OG_00342722	OG_00372429	OG_00379159	OG_00485948	OG_00486141	OG_00486197	OG_00486423	OG_00487008	OG_00487272	OG_00497785	OG_00499205	OG_00511719	OG_00636131	OG_00732074	OG_00762512	OG_00763889	OG_00779674	OG_00802794	OG_00803265	OG_00803966
17253	Neorickettsia sennetsu str. Miyayama	24	0	24	OG_00084366	OG_00085192	OG_00120492	OG_00136158	OG_00342722	OG_00372429	OG_00379159	OG_00485948	OG_00486141	OG_00486197	OG_00486423	OG_00487008	OG_00487272	OG_00497785	OG_00499205	OG_00511719	OG_00636131	OG_00732074	OG_00762512	OG_00763889	OG_00779674	OG_00802794	OG_00803265	OG_00803966
17273	Orientia tsutsugamushi str. Boryong	25	2	23	OG_00084366	OG_00085192	OG_00237963	OG_00372429	OG_00379159	OG_00483928	OG_00486136	OG_00486637	OG_00487020	OG_00487083	OG_00487174	OG_00487272	OG_00497785	OG_00499205	OG_00582023	OG_00763113	OG_00763889	OG_00801347	OG_00802543	OG_00803249	OG_00803265	OG_00803677	OG_00828262
17596	Treponema pallidum subsp. pallidum SS14	24	1	23	OG_00006771	OG_00084366	OG_00120621	OG_00136158	OG_00309120	OG_00483928	OG_00485987	OG_00487043	OG_00487149	OG_00487208	OG_00499205	OG_00582023	OG_00597137	OG_00601994	OG_00637411	OG_00732074	OG_00778648	OG_00802794	OG_00803249	OG_00803677	OG_00871557	OG_00871578	OG_00871589
17597	Treponema pallidum subsp. pallidum str. Nichols	23	0	23	OG_00006771	OG_00084366	OG_00120621	OG_00136158	OG_00309120	OG_00483928	OG_00485987	OG_00487043	OG_00487149	OG_00487208	OG_00499205	OG_00582023	OG_00597137	OG_00601994	OG_00637411	OG_00732074	OG_00778648	OG_00802794	OG_00803249	OG_00803677	OG_00871557	OG_00871578	OG_00871589
19794	Buchnera aphidicola str. TLW03 (Acyrthosiphon pisum)	25	3	22	OG_00084320	OG_00136158	OG_00309120	OG_00379159	OG_00486141	OG_00486321	OG_00486637	OG_00486694	OG_00487272	OG_00586063	OG_00636131	OG_00687521	OG_00701205	OG_00778648	OG_00801347	OG_00803071	OG_00803249	OG_00803265	OG_00803677	OG_00804133	OG_00804361	OG_00871578
19793	Buchnera aphidicola str. LL01 (Acyrthosiphon pisum)	24	2	22	OG_00084320	OG_00136158	OG_00309120	OG_00379159	OG_00486141	OG_00486321	OG_00486637	OG_00486694	OG_00486957	OG_00487272	OG_00586063	OG_00636131	OG_00687521	OG_00701205	OG_00801347	OG_00803071	OG_00803249	OG_00803265	OG_00803677	OG_00804133	OG_00804361	OG_00828262
17274	Orientia tsutsugamushi str. Ikeda	23	1	22	OG_00084366	OG_00085192	OG_00237963	OG_00372429	OG_00379159	OG_00483928	OG_00486136	OG_00486637	OG_00487020	OG_00487083	OG_00487272	OG_00497785	OG_00499205	OG_00582023	OG_00763113	OG_00763889	OG_00801347	OG_00802543	OG_00803249	OG_00803265	OG_00803677	OG_00828262
16813	Candidatus Amoebophilus asiaticus 5a2	22	0	22	OG_00136158	OG_00372429	OG_00483928	OG_00485899	OG_00486028	OG_00486136	OG_00487020	OG_00487043	OG_00487083	OG_00487145	OG_00497785	OG_00586063	OG_00743491	OG_00763113	OG_00763245	OG_00778584	OG_00801347	OG_00802543	OG_00803249	OG_00803677	OG_00803686	OG_00804361
16775	Buchnera aphidicola str. Sg (Schizaphis graminum)	27	6	21	OG_00084320	OG_00136158	OG_00309120	OG_00379159	OG_00486141	OG_00486321	OG_00486637	OG_00486694	OG_00487208	OG_00497785	OG_00586063	OG_00636131	OG_00687521	OG_00701205	OG_00801347	OG_00803071	OG_00803249	OG_00803265	OG_00803677	OG_00804133	OG_00804361
19792	Buchnera aphidicola str. JF99 (Acyrthosiphon pisum)	23	2	21	OG_00084320	OG_00136158	OG_00309120	OG_00379159	OG_00486141	OG_00486321	OG_00486637	OG_00486694	OG_00487272	OG_00586063	OG_00636131	OG_00687521	OG_00701205	OG_00763889	OG_00801347	OG_00803071	OG_00803249	OG_00803265	OG_00803677	OG_00804133	OG_00804361
16749	Borrelia burgdorferi ZS7	22	1	21	OG_00084366	OG_00483928	OG_00485987	OG_00486136	OG_00486141	OG_00487043	OG_00487149	OG_00487272	OG_00497785	OG_00597137	OG_00601994	OG_00637411	OG_00732074	OG_00764224	OG_00778648	OG_00801347	OG_00802794	OG_00804133	OG_00871557	OG_00871578	OG_00871589
16679	Anaplasma phagocytophilum HZ	21	0	21	OG_00084366	OG_00085192	OG_00136158	OG_00342722	OG_00372429	OG_00485948	OG_00486087	OG_00486141	OG_00486197	OG_00486423	OG_00487008	OG_00487272	OG_00497785	OG_00499205	OG_00499434	OG_00636131	OG_00637411	OG_00732074	OG_00762512	OG_00763889	OG_00803966
16816	Candidatus Blochmannia pennsylvanicus str. BPEN	21	0	21	OG_00084244	OG_00084320	OG_00084366	OG_00120492	OG_00136158	OG_00279053	OG_00379159	OG_00486141	OG_00486694	OG_00487272	OG_00636131	OG_00687521	OG_00762512	OG_00764224	OG_00778584	OG_00779047	OG_00801347	OG_00802676	OG_00803265	OG_00804133	OG_00828057
16967	Ehrlichia canis str. Jake	21	0	21	OG_00084366	OG_00085192	OG_00136158	OG_00342722	OG_00372429	OG_00379159	OG_00485948	OG_00486087	OG_00486197	OG_00486423	OG_00487008	OG_00487272	OG_00497785	OG_00499205	OG_00499434	OG_00582020	OG_00636131	OG_00762512	OG_00763889	OG_00803265	OG_00803966
16968	Ehrlichia chaffeensis str. Arkansas	21	0	21	OG_00084366	OG_00085192	OG_00136158	OG_00342722	OG_00372429	OG_00379159	OG_00485948	OG_00486087	OG_00486197	OG_00486423	OG_00487008	OG_00487272	OG_00497785	OG_00499205	OG_00499434	OG_00582020	OG_00636131	OG_00762512	OG_00763889	OG_00803265	OG_00803966
16969	Ehrlichia ruminantium str. Gardel	21	0	21	OG_00084366	OG_00085192	OG_00136158	OG_00342722	OG_00372429	OG_00379159	OG_00485948	OG_00486087	OG_00486197	OG_00486423	OG_00487008	OG_00487272	OG_00497785	OG_00499205	OG_00499434	OG_00582020	OG_00636131	OG_00762512	OG_00763889	OG_00803265	OG_00803966
16970	Ehrlichia ruminantium str. Welgevonden	21	0	21	OG_00084366	OG_00085192	OG_00136158	OG_00342722	OG_00372429	OG_00379159	OG_00485948	OG_00486087	OG_00486197	OG_00486423	OG_00487008	OG_00487272	OG_00497785	OG_00499205	OG_00499434	OG_00582020	OG_00636131	OG_00762512	OG_00763889	OG_00803265	OG_00803966
16971	Ehrlichia ruminantium str. Welgevonden	21	0	21	OG_00084366	OG_00085192	OG_00136158	OG_00342722	OG_00372429	OG_00379159	OG_00485948	OG_00486087	OG_00486197	OG_00486423	OG_00487008	OG_00487272	OG_00497785	OG_00499205	OG_00499434	OG_00582020	OG_00636131	OG_00762512	OG_00763889	OG_00803265	OG_00803966
16776	Buchnera aphidicola str. Tuc7 (Acyrthosiphon pisum)	21	1	20	OG_00084320	OG_00136158	OG_00309120	OG_00379159	OG_00486141	OG_00486321	OG_00486637	OG_00486694	OG_00497785	OG_00586063	OG_00636131	OG_00687521	OG_00701205	OG_00801347	OG_00803071	OG_00803249	OG_00803265	OG_00803677	OG_00804133	OG_00804361
16930	Dehalococcoides sp. BAV1	21	1	20	OG_00120492	OG_00342722	OG_00372429	OG_00485948	OG_00486027	OG_00486087	OG_00486321	OG_00486366	OG_00486423	OG_00486957	OG_00487008	OG_00499205	OG_00586063	OG_00721630	OG_00763113	OG_00778584	OG_00779047	OG_00802510	OG_00803966	OG_00871666
17381	Rickettsia bellii OSU 85-389	21	1	20	OG_00085192	OG_00136158	OG_00372429	OG_00474462	OG_00483928	OG_00486136	OG_00486359	OG_00486996	OG_00487083	OG_00487272	OG_00497785	OG_00499205	OG_00582023	OG_00763113	OG_00763889	OG_00792356	OG_00801347	OG_00803028	OG_00803249	OG_00803677
19784	Borrelia afzelii PKo	20	0	20	OG_00084366	OG_00483928	OG_00485987	OG_00486136	OG_00486141	OG_00487043	OG_00487149	OG_00487272	OG_00497785	OG_00597137	OG_00601994	OG_00637411	OG_00732074	OG_00778648	OG_00801347	OG_00802794	OG_00804133	OG_00871557	OG_00871578	OG_00871589
16748	Borrelia burgdorferi B31	20	0	20	OG_00084366	OG_00483928	OG_00485987	OG_00486136	OG_00486141	OG_00487043	OG_00487149	OG_00487272	OG_00497785	OG_00597137	OG_00601994	OG_00637411	OG_00732074	OG_00778648	OG_00801347	OG_00802794	OG_00804133	OG_00871557	OG_00871578	OG_00871589
19785	Borrelia burgdorferi JD1	20	0	20	OG_00084366	OG_00483928	OG_00485987	OG_00486136	OG_00486141	OG_00487043	OG_00487149	OG_00487272	OG_00497785	OG_00597137	OG_00601994	OG_00637411	OG_00732074	OG_00778648	OG_00801347	OG_00802794	OG_00804133	OG_00871557	OG_00871578	OG_00871589
19786	Borrelia burgdorferi N40	20	0	20	OG_00084366	OG_00483928	OG_00485987	OG_00486136	OG_00486141	OG_00487043	OG_00487149	OG_00487272	OG_00497785	OG_00597137	OG_00601994	OG_00637411	OG_00732074	OG_00778648	OG_00801347	OG_00802794	OG_00804133	OG_00871557	OG_00871578	OG_00871589
18608	Borrelia garinii PBi	20	0	20	OG_00084366	OG_00483928	OG_00485987	OG_00486136	OG_00486141	OG_00487043	OG_00487149	OG_00487272	OG_00497785	OG_00597137	OG_00601994	OG_00637411	OG_00732074	OG_00778648	OG_00801347	OG_00802794	OG_00804133	OG_00871557	OG_00871578	OG_00871589
19787	Borrelia hermsii DAH	20	0	20	OG_00084366	OG_00483928	OG_00485987	OG_00486136	OG_00487043	OG_00487149	OG_00487272	OG_00497785	OG_00597137	OG_00601994	OG_00637411	OG_00732074	OG_00778648	OG_00801347	OG_00802794	OG_00803249	OG_00803677	OG_00871557	OG_00871578	OG_00871589
16754	Borrelia turicatae 91E135	20	0	20	OG_00084366	OG_00483928	OG_00485987	OG_00486136	OG_00487043	OG_00487149	OG_00487272	OG_00497785	OG_00597137	OG_00601994	OG_00637411	OG_00732074	OG_00778648	OG_00801347	OG_00802794	OG_00803249	OG_00803677	OG_00871557	OG_00871578	OG_00871589
16771	Buchnera aphidicola str. 5A (Acyrthosiphon pisum)	20	0	20	OG_00084320	OG_00136158	OG_00309120	OG_00379159	OG_00486141	OG_00486321	OG_00486637	OG_00486694	OG_00497785	OG_00586063	OG_00636131	OG_00687521	OG_00701205	OG_00801347	OG_00803071	OG_00803249	OG_00803265	OG_00803677	OG_00804133	OG_00804361
16772	Buchnera aphidicola str. APS (Acyrthosiphon pisum)	20	0	20	OG_00084320	OG_00136158	OG_00309120	OG_00379159	OG_00486141	OG_00486321	OG_00486637	OG_00486694	OG_00497785	OG_00586063	OG_00636131	OG_00687521	OG_00701205	OG_00801347	OG_00803071	OG_00803249	OG_00803265	OG_00803677	OG_00804133	OG_00804361
17383	Rickettsia canadensis str. McKiel	20	0	20	OG_00085192	OG_00136158	OG_00372429	OG_00474462	OG_00483928	OG_00486136	OG_00486359	OG_00486996	OG_00487083	OG_00487272	OG_00497785	OG_00499205	OG_00582023	OG_00636131	OG_00763113	OG_00763889	OG_00801347	OG_00802543	OG_00803249	OG_00803677
16903	Coprothermobacter proteolyticus DSM 5265	22	3	19	OG_00084366	OG_00279053	OG_00372429	OG_00486087	OG_00486197	OG_00487020	OG_00487149	OG_00487167	OG_00586063	OG_00605287	OG_00637411	OG_00687521	OG_00721630	OG_00763113	OG_00776156	OG_00804278	OG_00804286	OG_00828057	OG_00871557
19852	Dehalococcoides sp. GT	21	2	19	OG_00120492	OG_00342722	OG_00372429	OG_00485948	OG_00486027	OG_00486087	OG_00486321	OG_00486366	OG_00486423	OG_00486957	OG_00487008	OG_00499205	OG_00586063	OG_00721630	OG_00763113	OG_00778584	OG_00779047	OG_00802510	OG_00803966
16932	Dehalococcoides sp. VS	21	2	19	OG_00120492	OG_00342722	OG_00372429	OG_00485948	OG_00486027	OG_00486087	OG_00486321	OG_00486366	OG_00486423	OG_00486957	OG_00487008	OG_00499205	OG_00586063	OG_00721630	OG_00763113	OG_00778584	OG_00779047	OG_00802510	OG_00803966
16753	Borrelia recurrentis A1	20	1	19	OG_00084366	OG_00483928	OG_00485987	OG_00486136	OG_00486141	OG_00487043	OG_00487149	OG_00487272	OG_00497785	OG_00597137	OG_00601994	OG_00637411	OG_00732074	OG_00778648	OG_00801347	OG_00802794	OG_00871557	OG_00871578	OG_00871589
16929	Dehalococcoides ethenogenes 195	20	1	19	OG_00120492	OG_00342722	OG_00372429	OG_00485948	OG_00486027	OG_00486087	OG_00486321	OG_00486366	OG_00486423	OG_00486957	OG_00487008	OG_00499205	OG_00586063	OG_00721630	OG_00763113	OG_00778584	OG_00779047	OG_00802510	OG_00803966
16931	Dehalococcoides sp. CBDB1	20	1	19	OG_00120492	OG_00342722	OG_00372429	OG_00485948	OG_00486027	OG_00486087	OG_00486321	OG_00486366	OG_00486423	OG_00486957	OG_00487008	OG_00499205	OG_00586063	OG_00721630	OG_00763113	OG_00778584	OG_00779047	OG_00802510	OG_00803966
16750	Borrelia duttonii Ly	19	0	19	OG_00084366	OG_00483928	OG_00485987	OG_00486136	OG_00486141	OG_00487043	OG_00487149	OG_00487272	OG_00497785	OG_00597137	OG_00601994	OG_00637411	OG_00732074	OG_00778648	OG_00801347	OG_00802794	OG_00871557	OG_00871578	OG_00871589
17380	Rickettsia akari str. Hartford	19	0	19	OG_00085192	OG_00136158	OG_00372429	OG_00474462	OG_00483928	OG_00486136	OG_00486359	OG_00486996	OG_00487083	OG_00487272	OG_00497785	OG_00499205	OG_00582023	OG_00763113	OG_00763889	OG_00801347	OG_00802543	OG_00803249	OG_00803677
17387	Rickettsia peacockii str. Rustic	19	0	19	OG_00085192	OG_00136158	OG_00372429	OG_00474462	OG_00483928	OG_00486136	OG_00486359	OG_00486996	OG_00487083	OG_00487272	OG_00497785	OG_00499205	OG_00582023	OG_00762512	OG_00763113	OG_00763889	OG_00801347	OG_00803249	OG_00803677
19843	Coprococcus sp. ART55/1	49	31	18	OG_00085192	OG_00237963	OG_00486027	OG_00486028	OG_00486066	OG_00486366	OG_00486754	OG_00487083	OG_00487096	OG_00487167	OG_00762959	OG_00763822	OG_00776156	OG_00803071	OG_00804018	OG_00804544	OG_00804698	OG_00871666
19817	Chlamydia trachomatis D-EC	20	2	18	OG_00136158	OG_00485987	OG_00486321	OG_00486357	OG_00487083	OG_00487149	OG_00636131	OG_00763113	OG_00778584	OG_00778648	OG_00779047	OG_00801347	OG_00802794	OG_00803249	OG_00803677	OG_00803686	OG_00871557	OG_00871589
19818	Chlamydia trachomatis D-LC	20	2	18	OG_00136158	OG_00485987	OG_00486321	OG_00486357	OG_00487083	OG_00487149	OG_00636131	OG_00763113	OG_00778584	OG_00778648	OG_00779047	OG_00801347	OG_00802794	OG_00803249	OG_00803677	OG_00803686	OG_00871557	OG_00871589
19853	Dehalogenimonas lykanthroporepellens BL-DC-9	20	2	18	OG_00120492	OG_00342722	OG_00372429	OG_00485948	OG_00486027	OG_00486087	OG_00486321	OG_00486366	OG_00486423	OG_00486957	OG_00487008	OG_00586063	OG_00763113	OG_00778584	OG_00779047	OG_00802510	OG_00803966	OG_00804224
16630	Acholeplasma laidlawii PG-8A	19	1	18	OG_00006771	OG_00342722	OG_00485948	OG_00486087	OG_00486141	OG_00486366	OG_00486423	OG_00487008	OG_00487020	OG_00487272	OG_00497785	OG_00802794	OG_00803249	OG_00803677	OG_00803686	OG_00803966	OG_00804224	OG_00844379
17390	Rickettsia rickettsii str. Iowa	19	1	18	OG_00085192	OG_00136158	OG_00372429	OG_00474462	OG_00483928	OG_00486136	OG_00486359	OG_00486996	OG_00487083	OG_00487272	OG_00497785	OG_00499205	OG_00582023	OG_00763113	OG_00763889	OG_00801347	OG_00803249	OG_00803677
17389	Rickettsia rickettsii str. 'Sheila Smith'	19	1	18	OG_00085192	OG_00136158	OG_00372429	OG_00474462	OG_00483928	OG_00486136	OG_00486359	OG_00486996	OG_00487083	OG_00487272	OG_00497785	OG_00499205	OG_00582023	OG_00763113	OG_00763889	OG_00801347	OG_00803249	OG_00803677
16740	Blattabacterium sp. (Blattella germanica) str. Bge	18	0	18	OG_00136158	OG_00309120	OG_00372429	OG_00379159	OG_00486028	OG_00486141	OG_00497785	OG_00499205	OG_00586063	OG_00762512	OG_00763113	OG_00764224	OG_00778584	OG_00802676	OG_00803265	OG_00804133	OG_00828057	OG_00871498
16741	Blattabacterium sp. (Periplaneta americana) str. BPLAN	18	0	18	OG_00136158	OG_00309120	OG_00372429	OG_00379159	OG_00486028	OG_00486141	OG_00497785	OG_00499205	OG_00586063	OG_00762512	OG_00763113	OG_00764224	OG_00778584	OG_00802676	OG_00803265	OG_00804133	OG_00828057	OG_00871498
17379	Rickettsia africae ESF-5	18	0	18	OG_00085192	OG_00136158	OG_00372429	OG_00474462	OG_00483928	OG_00486136	OG_00486359	OG_00486996	OG_00487083	OG_00487272	OG_00497785	OG_00499205	OG_00582023	OG_00763113	OG_00763889	OG_00801347	OG_00803249	OG_00803677
17382	Rickettsia bellii RML369-C	18	0	18	OG_00085192	OG_00136158	OG_00372429	OG_00474462	OG_00483928	OG_00486136	OG_00486359	OG_00486996	OG_00487083	OG_00487272	OG_00497785	OG_00499205	OG_00582023	OG_00763113	OG_00763889	OG_00801347	OG_00803249	OG_00803677
17384	Rickettsia conorii str. Malish 7	18	0	18	OG_00085192	OG_00136158	OG_00372429	OG_00474462	OG_00483928	OG_00486136	OG_00486359	OG_00486996	OG_00487083	OG_00487272	OG_00497785	OG_00499205	OG_00582023	OG_00763113	OG_00763889	OG_00801347	OG_00803249	OG_00803677
17385	Rickettsia felis URRWXCal2	18	0	18	OG_00085192	OG_00136158	OG_00372429	OG_00474462	OG_00483928	OG_00486136	OG_00486359	OG_00486996	OG_00487083	OG_00487272	OG_00497785	OG_00499205	OG_00582023	OG_00763113	OG_00763889	OG_00801347	OG_00803249	OG_00803677
17386	Rickettsia massiliae MTU5	18	0	18	OG_00085192	OG_00136158	OG_00372429	OG_00474462	OG_00483928	OG_00486136	OG_00486359	OG_00486996	OG_00487083	OG_00487272	OG_00497785	OG_00499205	OG_00582023	OG_00763113	OG_00763889	OG_00801347	OG_00803249	OG_00803677
20006	Rickettsia prowazekii Rp22	18	0	18	OG_00085192	OG_00136158	OG_00372429	OG_00474462	OG_00483928	OG_00486136	OG_00486359	OG_00486996	OG_00487083	OG_00487272	OG_00497785	OG_00499205	OG_00582023	OG_00763113	OG_00763889	OG_00801347	OG_00803249	OG_00803677
17388	Rickettsia prowazekii str. Madrid E	18	0	18	OG_00085192	OG_00136158	OG_00372429	OG_00474462	OG_00483928	OG_00486136	OG_00486359	OG_00486996	OG_00487083	OG_00487272	OG_00497785	OG_00499205	OG_00582023	OG_00763113	OG_00763889	OG_00801347	OG_00803249	OG_00803677
17391	Rickettsia typhi str. Wilmington	18	0	18	OG_00085192	OG_00136158	OG_00372429	OG_00474462	OG_00483928	OG_00486136	OG_00486359	OG_00486996	OG_00487083	OG_00487272	OG_00497785	OG_00499205	OG_00582023	OG_00763113	OG_00763889	OG_00801347	OG_00803249	OG_00803677
17657	Chlamydophila pneumoniae LPCoLN	18	1	17	OG_00136158	OG_00485987	OG_00486321	OG_00486357	OG_00487083	OG_00487149	OG_00636131	OG_00763113	OG_00778584	OG_00778648	OG_00779047	OG_00801347	OG_00802794	OG_00803249	OG_00803677	OG_00803686	OG_00871589
16844	Chlamydia trachomatis 434/Bu	17	0	17	OG_00136158	OG_00485987	OG_00486321	OG_00486357	OG_00487083	OG_00487149	OG_00636131	OG_00763113	OG_00778584	OG_00778648	OG_00779047	OG_00801347	OG_00802794	OG_00803249	OG_00803677	OG_00803686	OG_00871589
16845	Chlamydia trachomatis A/HAR-13	17	0	17	OG_00136158	OG_00485987	OG_00486321	OG_00486357	OG_00487083	OG_00487149	OG_00636131	OG_00763113	OG_00778584	OG_00778648	OG_00779047	OG_00801347	OG_00802794	OG_00803249	OG_00803677	OG_00803686	OG_00871589
16846	Chlamydia trachomatis B/Jali20/OT	17	0	17	OG_00136158	OG_00485987	OG_00486321	OG_00486357	OG_00487083	OG_00487149	OG_00636131	OG_00763113	OG_00778584	OG_00778648	OG_00779047	OG_00801347	OG_00802794	OG_00803249	OG_00803677	OG_00803686	OG_00871589
16847	Chlamydia trachomatis B/TZ1A828/OT	17	0	17	OG_00136158	OG_00485987	OG_00486321	OG_00486357	OG_00487083	OG_00487149	OG_00636131	OG_00763113	OG_00778584	OG_00778648	OG_00779047	OG_00801347	OG_00802794	OG_00803249	OG_00803677	OG_00803686	OG_00871589
16848	Chlamydia trachomatis D/UW-3/CX	17	0	17	OG_00136158	OG_00485987	OG_00486321	OG_00486357	OG_00487083	OG_00487149	OG_00636131	OG_00763113	OG_00778584	OG_00778648	OG_00779047	OG_00801347	OG_00802794	OG_00803249	OG_00803677	OG_00803686	OG_00871589
19819	Chlamydia trachomatis E/11023	17	0	17	OG_00136158	OG_00485987	OG_00486321	OG_00486357	OG_00487083	OG_00487149	OG_00636131	OG_00763113	OG_00778584	OG_00778648	OG_00779047	OG_00801347	OG_00802794	OG_00803249	OG_00803677	OG_00803686	OG_00871589
19820	Chlamydia trachomatis E/150	17	0	17	OG_00136158	OG_00485987	OG_00486321	OG_00486357	OG_00487083	OG_00487149	OG_00636131	OG_00763113	OG_00778584	OG_00778648	OG_00779047	OG_00801347	OG_00802794	OG_00803249	OG_00803677	OG_00803686	OG_00871589
19821	Chlamydia trachomatis G/11074	17	0	17	OG_00136158	OG_00485987	OG_00486321	OG_00486357	OG_00487083	OG_00487149	OG_00636131	OG_00763113	OG_00778584	OG_00778648	OG_00779047	OG_00801347	OG_00802794	OG_00803249	OG_00803677	OG_00803686	OG_00871589
19822	Chlamydia trachomatis G/11222	17	0	17	OG_00136158	OG_00485987	OG_00486321	OG_00486357	OG_00487083	OG_00487149	OG_00636131	OG_00763113	OG_00778584	OG_00778648	OG_00779047	OG_00801347	OG_00802794	OG_00803249	OG_00803677	OG_00803686	OG_00871589
19823	Chlamydia trachomatis G/9301	17	0	17	OG_00136158	OG_00485987	OG_00486321	OG_00486357	OG_00487083	OG_00487149	OG_00636131	OG_00763113	OG_00778584	OG_00778648	OG_00779047	OG_00801347	OG_00802794	OG_00803249	OG_00803677	OG_00803686	OG_00871589
19824	Chlamydia trachomatis G/9768	17	0	17	OG_00136158	OG_00485987	OG_00486321	OG_00486357	OG_00487083	OG_00487149	OG_00636131	OG_00763113	OG_00778584	OG_00778648	OG_00779047	OG_00801347	OG_00802794	OG_00803249	OG_00803677	OG_00803686	OG_00871589
16849	Chlamydia trachomatis L2b/UCH-1/proctitis	17	0	17	OG_00136158	OG_00485987	OG_00486321	OG_00486357	OG_00487083	OG_00487149	OG_00636131	OG_00763113	OG_00778584	OG_00778648	OG_00779047	OG_00801347	OG_00802794	OG_00803249	OG_00803677	OG_00803686	OG_00871589
19825	Chlamydia trachomatis Sweden2	17	0	17	OG_00136158	OG_00485987	OG_00486321	OG_00486357	OG_00487083	OG_00487149	OG_00636131	OG_00763113	OG_00778584	OG_00778648	OG_00779047	OG_00801347	OG_00802794	OG_00803249	OG_00803677	OG_00803686	OG_00871589
16850	Chlamydophila abortus S26/3	17	0	17	OG_00136158	OG_00485987	OG_00486321	OG_00486357	OG_00487083	OG_00487149	OG_00636131	OG_00763113	OG_00778584	OG_00778648	OG_00779047	OG_00801347	OG_00802794	OG_00803249	OG_00803677	OG_00803686	OG_00871589
16843	Chlamydia muridarum Nigg	19	3	16	OG_00136158	OG_00237963	OG_00485987	OG_00486321	OG_00486357	OG_00487083	OG_00487149	OG_00636131	OG_00763113	OG_00778584	OG_00778648	OG_00779047	OG_00801347	OG_00802794	OG_00803686	OG_00871589
17619	Wigglesworthia glossinidia endosymbiont of Glossina brevipalpis	18	2	16	OG_00084320	OG_00084366	OG_00136158	OG_00279053	OG_00379159	OG_00486141	OG_00486637	OG_00582023	OG_00636131	OG_00687521	OG_00743491	OG_00779047	OG_00802676	OG_00803265	OG_00804133	OG_00828057
19826	Chlamydophila pneumoniae AR39	16	0	16	OG_00136158	OG_00485987	OG_00486321	OG_00486357	OG_00487083	OG_00487149	OG_00636131	OG_00763113	OG_00778584	OG_00778648	OG_00779047	OG_00801347	OG_00802794	OG_00803677	OG_00803686	OG_00871589
16851	Chlamydophila caviae GPIC	19	4	15	OG_00136158	OG_00485987	OG_00486321	OG_00486357	OG_00487083	OG_00487149	OG_00636131	OG_00763113	OG_00778584	OG_00778648	OG_00779047	OG_00801347	OG_00802794	OG_00803686	OG_00871589
17622	Wolbachia endosymbiont strain TRS of Brugia malayi	17	2	15	OG_00084366	OG_00136158	OG_00237963	OG_00372429	OG_00486141	OG_00486197	OG_00497785	OG_00499205	OG_00582023	OG_00636131	OG_00738990	OG_00762512	OG_00763889	OG_00778584	OG_00801347
16852	Chlamydophila felis Fe/C-56	15	0	15	OG_00136158	OG_00485987	OG_00486321	OG_00486357	OG_00487083	OG_00487149	OG_00636131	OG_00763113	OG_00778584	OG_00778648	OG_00779047	OG_00801347	OG_00802794	OG_00803686	OG_00871589
16854	Chlamydophila pneumoniae CWL029	15	0	15	OG_00136158	OG_00485987	OG_00486321	OG_00486357	OG_00487083	OG_00487149	OG_00636131	OG_00763113	OG_00778584	OG_00778648	OG_00779047	OG_00801347	OG_00802794	OG_00803686	OG_00871589
16855	Chlamydophila pneumoniae J138	15	0	15	OG_00136158	OG_00485987	OG_00486321	OG_00486357	OG_00487083	OG_00487149	OG_00636131	OG_00763113	OG_00778584	OG_00778648	OG_00779047	OG_00801347	OG_00802794	OG_00803686	OG_00871589
16856	Chlamydophila pneumoniae TW-183	15	0	15	OG_00136158	OG_00485987	OG_00486321	OG_00486357	OG_00487083	OG_00487149	OG_00636131	OG_00763113	OG_00778584	OG_00778648	OG_00779047	OG_00801347	OG_00802794	OG_00803686	OG_00871589
16728	Baumannia cicadellinicola str. Hc (Homalodisca coagulata)	16	2	14	OG_00084366	OG_00136158	OG_00379159	OG_00486028	OG_00486141	OG_00487145	OG_00636131	OG_00637411	OG_00732074	OG_00743491	OG_00778584	OG_00802676	OG_00803265	OG_00804133
17600	Tropheryma whipplei str. Twist	14	0	14	OG_00084366	OG_00309120	OG_00486141	OG_00486409	OG_00487145	OG_00497785	OG_00605287	OG_00636131	OG_00637411	OG_00688306	OG_00743491	OG_00762512	OG_00804286	OG_00871433
17599	Tropheryma whipplei TW08/27	14	0	14	OG_00084366	OG_00309120	OG_00486141	OG_00486409	OG_00487145	OG_00497785	OG_00605287	OG_00636131	OG_00637411	OG_00688306	OG_00743491	OG_00762512	OG_00804286	OG_00871433
17654	uncultured Termite group 1 bacterium phylotype Rs-D17	14	0	14	OG_00084366	OG_00136158	OG_00486027	OG_00486957	OG_00497785	OG_00721630	OG_00743491	OG_00775806	OG_00778584	OG_00779047	OG_00802510	OG_00802676	OG_00802794	OG_00804224
17595	Treponema denticola ATCC 35405	13	0	13	OG_00084366	OG_00485987	OG_00487043	OG_00487149	OG_00487272	OG_00601994	OG_00637411	OG_00732074	OG_00778648	OG_00802794	OG_00871557	OG_00871578	OG_00871589
19892	Fibrobacter succinogenes subsp. succinogenes S85	22	10	12	OG_00279053	OG_00485987	OG_00486357	OG_00487149	OG_00487174	OG_00499205	OG_00687521	OG_00778648	OG_00779047	OG_00802794	OG_00804224	OG_00871589
16671	Anaerococcus prevotii DSM 20548	16	4	12	OG_00485987	OG_00487149	OG_00597137	OG_00637411	OG_00721630	OG_00732074	OG_00776156	OG_00778584	OG_00778648	OG_00802543	OG_00802794	OG_00871589
18605	cyanobacterium UCYN-A	13	1	12	OG_00095538	OG_00309120	OG_00485977	OG_00486409	OG_00487145	OG_00487174	OG_00487208	OG_00701205	OG_00762512	OG_00778584	OG_00801347	OG_00802676
17590	Thermus thermophilus HB8	13	1	12	OG_00485987	OG_00487149	OG_00586063	OG_00763113	OG_00763889	OG_00778648	OG_00802794	OG_00803686	OG_00804224	OG_00804278	OG_00871557	OG_00871589
17620	Wolbachia endosymbiont of Culex quinquefasciatus Pel	13	1	12	OG_00084366	OG_00136158	OG_00372429	OG_00486197	OG_00497785	OG_00499205	OG_00582023	OG_00636131	OG_00738990	OG_00762512	OG_00763889	OG_00801347
17621	Wolbachia endosymbiont of Drosophila melanogaster	13	1	12	OG_00084366	OG_00136158	OG_00372429	OG_00486197	OG_00497785	OG_00499205	OG_00582023	OG_00636131	OG_00738990	OG_00762512	OG_00763889	OG_00801347
17623	Wolbachia sp. wRi	13	1	12	OG_00084366	OG_00136158	OG_00372429	OG_00486197	OG_00497785	OG_00499205	OG_00582023	OG_00636131	OG_00738990	OG_00762512	OG_00763889	OG_00801347
16825	Candidatus Pelagibacter ubique HTCC1062	12	0	12	OG_00084320	OG_00084366	OG_00485899	OG_00486141	OG_00486637	OG_00499205	OG_00687521	OG_00743491	OG_00762512	OG_00779047	OG_00802487	OG_00802962
16934	Deinococcus geothermalis DSM 11300	12	0	12	OG_00485987	OG_00487149	OG_00586063	OG_00637411	OG_00763113	OG_00778648	OG_00802794	OG_00803686	OG_00804224	OG_00804278	OG_00871557	OG_00871589
16935	Deinococcus radiodurans R1	12	0	12	OG_00485987	OG_00487149	OG_00586063	OG_00637411	OG_00763113	OG_00778648	OG_00802794	OG_00803686	OG_00804224	OG_00804278	OG_00871557	OG_00871589
19951	Meiothermus ruber DSM 1279	12	0	12	OG_00485987	OG_00487149	OG_00586063	OG_00763113	OG_00763889	OG_00778648	OG_00802794	OG_00803686	OG_00804224	OG_00804278	OG_00871557	OG_00871589
20065	Thermoanaerobacter mathranii subsp. mathranii str. A3	14	3	11	OG_00486478	OG_00486751	OG_00487322	OG_00511719	OG_00687521	OG_00743491	OG_00779674	OG_00804068	OG_00804286	OG_00804698	OG_00871789
17589	Thermus thermophilus HB27	13	2	11	OG_00485987	OG_00487149	OG_00586063	OG_00763113	OG_00763889	OG_00778648	OG_00802794	OG_00803686	OG_00804278	OG_00871557	OG_00871589
17563	Thermanaerovibrio acidaminovorans DSM 6589	12	1	11	OG_00483928	OG_00485987	OG_00487145	OG_00487149	OG_00605287	OG_00637411	OG_00776156	OG_00778648	OG_00802794	OG_00828262	OG_00871589
19952	Meiothermus silvanus DSM 9946	11	0	11	OG_00485987	OG_00487149	OG_00586063	OG_00763113	OG_00778648	OG_00802794	OG_00803686	OG_00804224	OG_00804278	OG_00871557	OG_00871589
19984	Oceanithermus profundus DSM 14977	11	0	11	OG_00485987	OG_00487149	OG_00586063	OG_00763113	OG_00778648	OG_00802794	OG_00803686	OG_00804224	OG_00804278	OG_00871557	OG_00871589
19950	Megamonas hypermegale	41	31	10	OG_00086231	OG_00483928	OG_00486222	OG_00486357	OG_00586063	OG_00701205	OG_00779047	OG_00802410	OG_00802510	OG_00803265
19751	Alistipes shahii WAL 8301	37	27	10	OG_00095538	OG_00485818	OG_00485987	OG_00486225	OG_00487149	OG_00586063	OG_00778648	OG_00802794	OG_00804278	OG_00871589
20012	Ruminococcus bromii	34	24	10	OG_00485987	OG_00487020	OG_00487149	OG_00743491	OG_00776156	OG_00778648	OG_00802794	OG_00802959	OG_00804698	OG_00871589
16898	Clostridium tetani E88	30	20	10	OG_00485987	OG_00487149	OG_00743491	OG_00776156	OG_00778648	OG_00802543	OG_00802794	OG_00802959	OG_00871498	OG_00871589
16933	Deinococcus deserti VCD115	12	2	10	OG_00485987	OG_00487149	OG_00586063	OG_00763113	OG_00778648	OG_00802794	OG_00803686	OG_00804278	OG_00871557	OG_00871589
17137	Leptospira interrogans serovar Copenhageni str. Fiocruz L1-130	12	2	10	OG_00084366	OG_00120492	OG_00486027	OG_00486028	OG_00486957	OG_00601994	OG_00764076	OG_00775806	OG_00779047	OG_00803686
20026	Spirochaeta thermophila DSM 6192	12	2	10	OG_00483928	OG_00485987	OG_00487043	OG_00487149	OG_00601994	OG_00778584	OG_00778648	OG_00802794	OG_00871578	OG_00871589
19895	Gardnerella vaginalis ATCC 14019	11	1	10	OG_00085192	OG_00120621	OG_00486366	OG_00597137	OG_00605287	OG_00637411	OG_00721630	OG_00803071	OG_00871498	OG_00871557
20025	Spirochaeta smaragdinae DSM 11293	11	1	10	OG_00084366	OG_00483928	OG_00485987	OG_00487043	OG_00487149	OG_00601994	OG_00778648	OG_00802794	OG_00871578	OG_00871589
17585	Thermotoga naphthophila RKU-10	11	1	10	OG_00084244	OG_00486087	OG_00601994	OG_00605287	OG_00701205	OG_00721630	OG_00776156	OG_00802510	OG_00802794	OG_00804133
16676	Anaplasma centrale str. Israel	10	0	10	OG_00084366	OG_00085192	OG_00136158	OG_00372429	OG_00486197	OG_00497785	OG_00499205	OG_00636131	OG_00762512	OG_00763889
16677	Anaplasma marginale str. Florida	10	0	10	OG_00084366	OG_00085192	OG_00136158	OG_00372429	OG_00486197	OG_00497785	OG_00499205	OG_00636131	OG_00762512	OG_00763889
16678	Anaplasma marginale str. St. Maries	10	0	10	OG_00084366	OG_00085192	OG_00136158	OG_00372429	OG_00486197	OG_00497785	OG_00499205	OG_00636131	OG_00762512	OG_00763889
16972	Elusimicrobium minutum Pei191	10	0	10	OG_00084366	OG_00486027	OG_00486366	OG_00486957	OG_00582023	OG_00601994	OG_00721630	OG_00775806	OG_00802487	OG_00804224
17013	Fibrobacter succinogenes subsp. succinogenes S85	10	0	10	OG_00279053	OG_00485987	OG_00486357	OG_00487149	OG_00499205	OG_00778648	OG_00779047	OG_00802794	OG_00804224	OG_00871589
17133	Leptospira biflexa serovar Patoc strain 'Patoc 1 (Ames)'	10	0	10	OG_00084366	OG_00120492	OG_00486027	OG_00486028	OG_00486957	OG_00601994	OG_00764224	OG_00779047	OG_00803686	OG_00871557
17134	Leptospira biflexa serovar Patoc strain 'Patoc 1 (Paris)'	10	0	10	OG_00084366	OG_00120492	OG_00486027	OG_00486028	OG_00486957	OG_00601994	OG_00779047	OG_00802959	OG_00803686	OG_00871557
17296	Pirellula staleyi DSM 6068	10	0	10	OG_00006771	OG_00342722	OG_00485948	OG_00486141	OG_00486321	OG_00486423	OG_00487008	OG_00779047	OG_00803966	OG_00804361
17586	Thermotoga neapolitana DSM 4359	10	0	10	OG_00084244	OG_00084366	OG_00486087	OG_00601994	OG_00605287	OG_00701205	OG_00721630	OG_00776156	OG_00802794	OG_00804133
17587	Thermotoga petrophila RKU-1	10	0	10	OG_00084244	OG_00084366	OG_00486087	OG_00601994	OG_00605287	OG_00701205	OG_00721630	OG_00776156	OG_00802794	OG_00804133
20076	Truepera radiovictrix DSM 17093	10	0	10	OG_00485987	OG_00487149	OG_00586063	OG_00763113	OG_00778648	OG_00802794	OG_00804224	OG_00804278	OG_00871557	OG_00871589
19938	Lactobacillus salivarius CECT 5713	43	34	9	OG_00086231	OG_00762512	OG_00764199	OG_00802794	OG_00802959	OG_00802986	OG_00804018	OG_00804286	OG_00804698
20014	Ruminococcus sp.	29	20	9	OG_00095538	OG_00485818	OG_00486225	OG_00486357	OG_00776156	OG_00802410	OG_00804544	OG_00804698	OG_00871498
19842	Coprococcus catus GD/7	26	17	9	OG_00085192	OG_00095538	OG_00485818	OG_00486357	OG_00776156	OG_00803071	OG_00803966	OG_00804698	OG_00871666
17031	Gardnerella vaginalis 409-05	19	10	9	OG_00085192	OG_00120621	OG_00486366	OG_00597137	OG_00605287	OG_00637411	OG_00803071	OG_00871498	OG_00871557
16944	Desulfotalea psychrophila LSv54	11	2	9	OG_00084320	OG_00084366	OG_00485977	OG_00486761	OG_00601994	OG_00687521	OG_00732074	OG_00803028	OG_00804133
17584	Thermotoga maritima MSB8	11	2	9	OG_00084244	OG_00486087	OG_00601994	OG_00605287	OG_00701205	OG_00721630	OG_00776156	OG_00802794	OG_00804133
17012	Fervidobacterium nodosum Rt17-B1	10	1	9	OG_00084244	OG_00486087	OG_00601994	OG_00605287	OG_00701205	OG_00721630	OG_00776156	OG_00802794	OG_00804133
17290	Petrotoga mobilis SJ95	10	1	9	OG_00084244	OG_00486087	OG_00601994	OG_00605287	OG_00701205	OG_00721630	OG_00776156	OG_00802794	OG_00804133
17588	Thermotoga sp. RQ2	10	1	9	OG_00084244	OG_00486087	OG_00601994	OG_00605287	OG_00701205	OG_00721630	OG_00776156	OG_00802794	OG_00804133
19753	Aminobacterium colombiense DSM 12261	9	0	9	OG_00279053	OG_00483928	OG_00485987	OG_00487145	OG_00487149	OG_00605287	OG_00778648	OG_00802794	OG_00871589
16829	Candidatus Ruthia magnifica str. Cm (Calyptogena magnifica)	9	0	9	OG_00084320	OG_00309120	OG_00486141	OG_00486694	OG_00687521	OG_00762512	OG_00778584	OG_00804133	OG_00804224
17100	Kosmotoga olearia TBF 19.5.1	9	0	9	OG_00084244	OG_00601994	OG_00605287	OG_00701205	OG_00721630	OG_00776156	OG_00802794	OG_00803677	OG_00804133
17583	Thermotoga lettingae TMO	9	0	9	OG_00084244	OG_00084366	OG_00486087	OG_00601994	OG_00605287	OG_00701205	OG_00721630	OG_00802794	OG_00804133
19887	Eubacterium siraeum V10Sc8a	32	24	8	OG_00483928	OG_00485818	OG_00486087	OG_00486357	OG_00721630	OG_00776156	OG_00803071	OG_00803265
19886	Eubacterium siraeum	29	21	8	OG_00095538	OG_00483928	OG_00485818	OG_00486087	OG_00486357	OG_00721630	OG_00776156	OG_00803071
20013	Ruminococcus obeum	28	20	8	OG_00485818	OG_00486225	OG_00486357	OG_00776156	OG_00804544	OG_00804698	OG_00871498	OG_00871666
16823	Candidatus Liberibacter asiaticus str. psy62	16	8	8	OG_00136158	OG_00372429	OG_00487208	OG_00497785	OG_00743491	OG_00801347	OG_00802962	OG_00804224
19827	Clostridiales genomosp. BVAB3 str. UPII9-5	14	6	8	OG_00485977	OG_00487272	OG_00497785	OG_00597137	OG_00637411	OG_00776156	OG_00802543	OG_00871498
17302	Porphyromonas gingivalis W83	14	6	8	OG_00485987	OG_00487149	OG_00487272	OG_00499205	OG_00586063	OG_00778648	OG_00802794	OG_00871589
17014	Finegoldia magna ATCC 29328	13	5	8	OG_00485987	OG_00487149	OG_00637411	OG_00721630	OG_00776156	OG_00778648	OG_00802794	OG_00871589
19881	Ethanoligenens harbinense YUAN-3	12	4	8	OG_00095538	OG_00485987	OG_00487149	OG_00764199	OG_00776156	OG_00778648	OG_00802794	OG_00871589
17564	Thermoanaerobacter pseudethanolicus ATCC 33223	12	4	8	OG_00485987	OG_00487149	OG_00743491	OG_00778584	OG_00778648	OG_00802794	OG_00804286	OG_00871589
17301	Porphyromonas gingivalis ATCC 33277	10	2	8	OG_00485987	OG_00487149	OG_00487272	OG_00499205	OG_00586063	OG_00778648	OG_00802794	OG_00871589
19756	Arcanobacterium haemolyticum DSM 20595	9	1	8	OG_00085192	OG_00120621	OG_00597137	OG_00605287	OG_00637411	OG_00732074	OG_00802543	OG_00803265
17135	Leptospira borgpetersenii serovar Hardjo-bovis JB197	9	1	8	OG_00084366	OG_00120492	OG_00486027	OG_00486028	OG_00486957	OG_00601994	OG_00779047	OG_00803686
17136	Leptospira borgpetersenii serovar Hardjo-bovis L550	9	1	8	OG_00084366	OG_00120492	OG_00486027	OG_00486028	OG_00486957	OG_00601994	OG_00779047	OG_00803686
17138	Leptospira interrogans serovar Lai str. 56601	9	1	8	OG_00084366	OG_00120492	OG_00486027	OG_00486028	OG_00486957	OG_00601994	OG_00779047	OG_00803686
16681	Aquifex aeolicus VF5	8	0	8	OG_00084320	OG_00372429	OG_00486028	OG_00486409	OG_00499205	OG_00687521	OG_00701205	OG_00763889
16828	Candidatus Protochlamydia amoebophila UWE25	8	0	8	OG_00136158	OG_00486321	OG_00486357	OG_00487083	OG_00636131	OG_00779047	OG_00803249	OG_00803677
16833	Candidatus Vesicomyosocius okutanii HA	8	0	8	OG_00309120	OG_00379159	OG_00486141	OG_00486694	OG_00636131	OG_00803265	OG_00804133	OG_00804224
19910	Helicobacter felis ATCC 49179	8	0	8	OG_00486269	OG_00497785	OG_00499205	OG_00763889	OG_00802959	OG_00802962	OG_00803028	OG_00804133
17369	Rhodopirellula baltica SH 1	8	0	8	OG_00342722	OG_00485948	OG_00486141	OG_00486321	OG_00486423	OG_00487008	OG_00779047	OG_00803966
20070	Thermocrinis albus DSM 14484	8	0	8	OG_00084244	OG_00084320	OG_00372429	OG_00487027	OG_00499205	OG_00687521	OG_00701205	OG_00763889
17580	Thermosipho africanus TCF52B	8	0	8	OG_00084244	OG_00486087	OG_00601994	OG_00605287	OG_00701205	OG_00776156	OG_00802794	OG_00804133
17581	Thermosipho melanesiensis BI429	8	0	8	OG_00084244	OG_00486087	OG_00601994	OG_00605287	OG_00701205	OG_00776156	OG_00802794	OG_00804133
19933	Lactobacillus delbrueckii subsp. bulgaricus ND02	8		8	OG_00762512	OG_00764199	OG_00778584	OG_00802959	OG_00871498
19782	Bifidobacterium longum subsp. longum F8	47	40	7	OG_00085192	OG_00120621	OG_00597137	OG_00605287	OG_00802962	OG_00803071	OG_00871557
19805	Campylobacter jejuni subsp. jejuni ICDCCJ07001	32	25	7	OG_00486197	OG_00486269	OG_00763889	OG_00776156	OG_00802959	OG_00803028	OG_00871666
20015	Ruminococcus sp. 18P13	27	20	7	OG_00095538	OG_00483928	OG_00487020	OG_00487174	OG_00776156	OG_00777384	OG_00871666
16802	Campylobacter concisus 13826	20	13	7	OG_00486269	OG_00487008	OG_00763889	OG_00776156	OG_00803028	OG_00804544	OG_00871578
19808	Candidatus Liberibacter solanacearum CLso-ZC1	14	7	7	OG_00136158	OG_00372429	OG_00497785	OG_00743491	OG_00801347	OG_00802962	OG_00804224
17565	Thermoanaerobacter sp. X514	12	5	7	OG_00485987	OG_00487149	OG_00743491	OG_00778648	OG_00802794	OG_00804286	OG_00871589
19883	Eubacterium limosum KIST612	11	4	7	OG_00095538	OG_00485987	OG_00487149	OG_00776156	OG_00778648	OG_00802794	OG_00871589
20066	Thermoanaerobacter sp. X513	11	4	7	OG_00485987	OG_00487149	OG_00743491	OG_00778648	OG_00802794	OG_00804286	OG_00871589
16733	Bifidobacterium animalis subsp. lactis AD011	10	3	7	OG_00085192	OG_00120621	OG_00597137	OG_00605287	OG_00803071	OG_00871498	OG_00871557
19777	Bifidobacterium animalis subsp. lactis BB-12	9	2	7	OG_00085192	OG_00120621	OG_00597137	OG_00605287	OG_00803071	OG_00871498	OG_00871557
19779	Bifidobacterium bifidum PRL2010	9	2	7	OG_00085192	OG_00120621	OG_00597137	OG_00605287	OG_00803071	OG_00871498	OG_00871557
19780	Bifidobacterium bifidum S17	9	2	7	OG_00085192	OG_00120621	OG_00597137	OG_00605287	OG_00803071	OG_00871498	OG_00871557
19781	Bifidobacterium longum subsp. longum BBMN68	9	2	7	OG_00085192	OG_00120621	OG_00237963	OG_00597137	OG_00605287	OG_00803071	OG_00871557
16734	Bifidobacterium animalis subsp. lactis Bl-04	8	1	7	OG_00085192	OG_00120621	OG_00597137	OG_00605287	OG_00803071	OG_00871498	OG_00871557
16735	Bifidobacterium animalis subsp. lactis DSM 10140	8	1	7	OG_00085192	OG_00120621	OG_00597137	OG_00605287	OG_00803071	OG_00871498	OG_00871557
19778	Bifidobacterium animalis subsp. lactis V9	8	1	7	OG_00085192	OG_00120621	OG_00597137	OG_00605287	OG_00803071	OG_00871498	OG_00871557
16756	Brachyspira hyodysenteriae WA1	8	1	7	OG_00120492	OG_00136158	OG_00779047	OG_00802794	OG_00802959	OG_00802986	OG_00871557
17073	Helicobacter acinonychis str. Sheeba	8	1	7	OG_00486269	OG_00497785	OG_00499205	OG_00763889	OG_00802959	OG_00802962	OG_00803028
17113	Lactobacillus johnsonii NCC 533	8	1	7	OG_00597137	OG_00637411	OG_00721630	OG_00732074	OG_00762512	OG_00764199	OG_00778584
17269	Oenococcus oeni PSU-1	8	1	7	OG_00120621	OG_00487145	OG_00721630	OG_00762512	OG_00764199	OG_00802510	OG_00828262
17030	Fusobacterium nucleatum subsp. nucleatum ATCC 25586	7	0	7	OG_00637411	OG_00701205	OG_00732074	OG_00802543	OG_00802676	OG_00804224	OG_00871498
19913	Helicobacter pylori 908	7	0	7	OG_00485878	OG_00486269	OG_00487321	OG_00499205	OG_00763889	OG_00802962	OG_00803028
19921	Hydrogenobacter thermophilus TK-6	7	0	7	OG_00084320	OG_00372429	OG_00487027	OG_00499205	OG_00687521	OG_00701205	OG_00763889
19922	Hydrogenobacter thermophilus TK-6	7	0	7	OG_00084320	OG_00372429	OG_00487027	OG_00499205	OG_00687521	OG_00701205	OG_00763889
17567	Thermobaculum terrenum ATCC BAA-798	7	0	7	OG_00372429	OG_00487027	OG_00487145	OG_00637411	OG_00763113	OG_00779047	OG_00828057
17575	Thermomicrobium roseum DSM 5159	7	0	7	OG_00372429	OG_00486409	OG_00486423	OG_00487145	OG_00586063	OG_00779047	OG_00802959
19863	Enterococcus sp. 7L76	34	28	6	OG_00085192	OG_00086231	OG_00372429	OG_00485818	OG_00487096	OG_00871666
20008	Roseburia intestinalis	24	18	6	OG_00095538	OG_00486225	OG_00486357	OG_00776156	OG_00804698	OG_00871666
19830	Clostridium cf. saccharolyticum K10	23	17	6	OG_00084244	OG_00485818	OG_00803071	OG_00804698	OG_00871498	OG_00871666
20016	Ruminococcus torques	20	14	6	OG_00485818	OG_00486225	OG_00486356	OG_00486357	OG_00776156	OG_00804698
17127	Lawsonia intracellularis PHE/MN1-00	15	9	6	OG_00487020	OG_00582023	OG_00763889	OG_00776156	OG_00802959	OG_00803028
16732	Bifidobacterium adolescentis ATCC 15703	12	6	6	OG_00085192	OG_00120621	OG_00597137	OG_00605287	OG_00803071	OG_00871557
17111	Lactobacillus helveticus DPC 4571	11	5	6	OG_00485818	OG_00486357	OG_00721630	OG_00762512	OG_00764199	OG_00778584
16814	Candidatus Azobacteroides pseudotrichonymphae genomovar. CFP2	9	3	6	OG_00120492	OG_00486028	OG_00499205	OG_00586063	OG_00743491	OG_00778584
20071	Thermosediminibacter oceani DSM 16646	9	3	6	OG_00372429	OG_00586063	OG_00687521	OG_00743491	OG_00779047	OG_00804286
16737	Bifidobacterium longum DJO10A	8	2	6	OG_00085192	OG_00120621	OG_00597137	OG_00605287	OG_00803071	OG_00871557
16738	Bifidobacterium longum NCC2705	8	2	6	OG_00085192	OG_00120621	OG_00597137	OG_00605287	OG_00803071	OG_00871557
16739	Bifidobacterium longum subsp. infantis ATCC 15697	8	2	6	OG_00085192	OG_00120621	OG_00597137	OG_00605287	OG_00803071	OG_00871557
19783	Bifidobacterium longum subsp. longum JDM301	8	2	6	OG_00085192	OG_00120621	OG_00597137	OG_00605287	OG_00803071	OG_00871557
17663	Helicobacter pylori	8	2	6	OG_00486222	OG_00486269	OG_00499205	OG_00763889	OG_00802962	OG_00803028
17104	Lactobacillus brevis ATCC 367	8	2	6	OG_00485983	OG_00497785	OG_00637411	OG_00732074	OG_00762512	OG_00764199
17110	Lactobacillus gasseri ATCC 33323	8	2	6	OG_00597137	OG_00637411	OG_00721630	OG_00762512	OG_00764199	OG_00778584
17283	Pediococcus pentosaceus ATCC 25745	8	2	6	OG_00487145	OG_00497785	OG_00721630	OG_00762512	OG_00764199	OG_00802487
17624	Wolinella succinogenes DSM 1740	8	2	6	OG_00486269	OG_00499205	OG_00763889	OG_00776156	OG_00802959	OG_00803028
16690	Atopobium parvulum DSM 20469	7	1	6	OG_00120492	OG_00486141	OG_00497785	OG_00597137	OG_00778584	OG_00871498
16736	Bifidobacterium dentium Bd1	7	1	6	OG_00085192	OG_00120621	OG_00597137	OG_00605287	OG_00803071	OG_00871557
19789	Brachyspira pilosicoli 95/1000	7	1	6	OG_00120492	OG_00136158	OG_00779047	OG_00802794	OG_00802986	OG_00871557
17103	Lactobacillus acidophilus NCFM	7	1	6	OG_00597137	OG_00721630	OG_00762512	OG_00764199	OG_00778584	OG_00802959
17184	Methylacidiphilum infernorum V4	7	1	6	OG_00084244	OG_00486141	OG_00486321	OG_00486357	OG_00636131	OG_00779047
19966	Mobiluncus curtisii ATCC 43063	7	1	6	OG_00085192	OG_00487145	OG_00497785	OG_00597137	OG_00637411	OG_00802543
17452	Slackia heliotrinireducens DSM 20476	7	1	6	OG_00085192	OG_00120492	OG_00486141	OG_00499205	OG_00743491	OG_00778584
19774	Bacteriovorax marinus SJ	6	0	6	OG_00486269	OG_00487321	OG_00636131	OG_00763113	OG_00871557	OG_00871666
19788	Brachyspira murdochii DSM 12563	6	0	6	OG_00120492	OG_00136158	OG_00779047	OG_00802794	OG_00802986	OG_00871557
17080	Helicobacter pylori P12	6	0	6	OG_00486269	OG_00499205	OG_00763889	OG_00802959	OG_00802962	OG_00803028
19919	Helicobacter pylori v225d	6	0	6	OG_00486269	OG_00499205	OG_00763889	OG_00802959	OG_00802962	OG_00803028
17086	Hydrogenobaculum sp. Y04AAS1	6	0	6	OG_00084320	OG_00372429	OG_00687521	OG_00701205	OG_00763889	OG_00779047
17272	Opitutus terrae PB90-1	6	0	6	OG_00084244	OG_00279053	OG_00486321	OG_00487321	OG_00636131	OG_00779047
20092	butyrate-producing bacterium SS3/4	24	19	5	OG_00279053	OG_00485818	OG_00487008	OG_00804698	OG_00871498
20093	butyrate-producing bacterium SSC/2	24	19	5	OG_00486222	OG_00486225	OG_00776156	OG_00777384	OG_00804544
19889	Faecalibacterium prausnitzii L2-6	19	14	5	OG_00095538	OG_00487208	OG_00691449	OG_00871433	OG_00871498
19797	Butyrivibrio fibrisolvens	18	13	5	OG_00095538	OG_00487083	OG_00776156	OG_00803071	OG_00804698
19802	Caldicellulosiruptor obsidiansis OB47	9	4	5	OG_00372429	OG_00687521	OG_00721630	OG_00743491	OG_00804286
19803	Caldicellulosiruptor owensensis OL	9	4	5	OG_00372429	OG_00687521	OG_00721630	OG_00743491	OG_00804286
16818	Candidatus Desulforudis audaxviator MP104C	9	4	5	OG_00372429	OG_00487145	OG_00586063	OG_00762512	OG_00776156
19930	Lactobacillus amylovorus GRL 1112	8	3	5	OG_00597137	OG_00721630	OG_00762512	OG_00764199	OG_00778584
17108	Lactobacillus delbrueckii subsp. bulgaricus ATCC BAA-365	8	3	5	OG_00637411	OG_00762512	OG_00764199	OG_00778584	OG_00871498
17142	Leuconostoc mesenteroides subsp. mesenteroides ATCC 8293	8	3	5	OG_00120621	OG_00487145	OG_00762512	OG_00764199	OG_00828262
16807	Campylobacter jejuni subsp. doylei 269.97	7	2	5	OG_00486269	OG_00497785	OG_00763889	OG_00776156	OG_00803028
19911	Helicobacter mustelae 12198	7	2	5	OG_00486269	OG_00497785	OG_00499205	OG_00763889	OG_00803028
19932	Lactobacillus crispatus ST1	7	2	5	OG_00597137	OG_00721630	OG_00762512	OG_00764199	OG_00778584
19935	Lactobacillus johnsonii FI9785	7	2	5	OG_00597137	OG_00721630	OG_00762512	OG_00764199	OG_00778584
19914	Helicobacter pylori B8	6	1	5	OG_00486269	OG_00499205	OG_00763889	OG_00802962	OG_00803028
17109	Lactobacillus fermentum IFO 3956	6	1	5	OG_00487145	OG_00721630	OG_00762512	OG_00764199	OG_00803249
19944	Leuconostoc gasicomitatum LMG 18811	6	1	5	OG_00120621	OG_00487145	OG_00762512	OG_00764199	OG_00828262
19945	Leuconostoc kimchii IMSNU 11154	6	1	5	OG_00120621	OG_00487145	OG_00762512	OG_00764199	OG_00828262
17244	Nautilia profundicola AmH	6	1	5	OG_00486269	OG_00743491	OG_00763889	OG_00803028	OG_00871756
17482	Streptobacillus moniliformis DSM 12112	6	1	5	OG_00487272	OG_00597137	OG_00721630	OG_00804224	OG_00871498
16660	Akkermansia muciniphila ATCC BAA-835	5	0	5	OG_00279053	OG_00486141	OG_00487272	OG_00636131	OG_00779047
16667	Alteromonas macleodii 'Deep ecotype'	5	0	5	OG_00085192	OG_00474144	OG_00586063	OG_00764224	OG_00779674
16811	Campylobacter lari RM2100	5	0	5	OG_00486269	OG_00497785	OG_00763889	OG_00776156	OG_00803028
17022	Francisella tularensis subsp. holarctica OSU18	5	0	5	OG_00485948	OG_00637411	OG_00732074	OG_00803071	OG_00804224
17032	Gemmatimonas aurantiaca T-27	5	0	5	OG_00486321	OG_00486357	OG_00636131	OG_00779047	OG_00804278
17074	Helicobacter hepaticus ATCC 51449	5	0	5	OG_00486269	OG_00499205	OG_00763889	OG_00802959	OG_00803028
17075	Helicobacter pylori 26695	5	0	5	OG_00486269	OG_00499205	OG_00763889	OG_00802962	OG_00803028
19912	Helicobacter pylori 35A	5	0	5	OG_00486269	OG_00499205	OG_00763889	OG_00802962	OG_00803028
17664	Helicobacter pylori 51	5	0	5	OG_00486269	OG_00499205	OG_00763889	OG_00802962	OG_00803028
17076	Helicobacter pylori B38	5	0	5	OG_00486269	OG_00499205	OG_00763889	OG_00802962	OG_00803028
19915	Helicobacter pylori Cuz20	5	0	5	OG_00486269	OG_00499205	OG_00763889	OG_00802962	OG_00803028
17077	Helicobacter pylori G27	5	0	5	OG_00486269	OG_00499205	OG_00763889	OG_00802962	OG_00803028
17078	Helicobacter pylori HPAG1	5	0	5	OG_00486269	OG_00499205	OG_00763889	OG_00802962	OG_00803028
17079	Helicobacter pylori J99	5	0	5	OG_00486269	OG_00499205	OG_00763889	OG_00802962	OG_00803028
19916	Helicobacter pylori PeCan4	5	0	5	OG_00486269	OG_00499205	OG_00763889	OG_00802962	OG_00803028
19918	Helicobacter pylori Sat464	5	0	5	OG_00486269	OG_00499205	OG_00763889	OG_00802962	OG_00803028
17081	Helicobacter pylori Shi470	5	0	5	OG_00486269	OG_00499205	OG_00763889	OG_00802962	OG_00803028
19917	Helicobacter pylori SJM180	5	0	5	OG_00486269	OG_00499205	OG_00763889	OG_00802962	OG_00803028
17116	Lactobacillus reuteri DSM 20016	5	0	5	OG_00474462	OG_00486359	OG_00582023	OG_00762512	OG_00764199
19993	Planctomyces limnophilus DSM 3776	5	0	5	OG_00006771	OG_00486141	OG_00636131	OG_00779047	OG_00804361
20009	Roseburia intestinalis XB6B4	25	21	4	OG_00486225	OG_00776156	OG_00802959	OG_00805761
19885	Eubacterium rectale M104/1	21	17	4	OG_00486225	OG_00486357	OG_00776156	OG_00804698
19884	Eubacterium rectale DSM 17629	20	16	4	OG_00486225	OG_00486357	OG_00776156	OG_00804698
17055	Haemophilus influenzae PittGG	17	13	4	OG_00700252	OG_00763889	OG_00801347	OG_00871666
16803	Campylobacter curvus 525.92	14	10	4	OG_00486269	OG_00763889	OG_00776156	OG_00803028
17054	Haemophilus influenzae PittEE	12	8	4	OG_00379159	OG_00698526	OG_00700252	OG_00792356
16723	Bartonella bacilliformis KC583	9	5	4	OG_00499205	OG_00499434	OG_00743491	OG_00803071
16670	Caldicellulosiruptor bescii DSM 6725	9	5	4	OG_00372429	OG_00687521	OG_00743491	OG_00804286
19799	Caldicellulosiruptor hydrothermalis 108	8	4	4	OG_00372429	OG_00687521	OG_00743491	OG_00804286
19800	Caldicellulosiruptor kristjanssonii 177R1B	8	4	4	OG_00372429	OG_00687521	OG_00743491	OG_00804286
19801	Caldicellulosiruptor kronotskyensis 2002	8	4	4	OG_00372429	OG_00687521	OG_00743491	OG_00804286
16800	Caldicellulosiruptor saccharolyticus DSM 8903	8	4	4	OG_00372429	OG_00687521	OG_00743491	OG_00804286
16668	Ammonifex degensii KC4	7	3	4	OG_00586063	OG_00687521	OG_00743491	OG_00804286
17107	Lactobacillus delbrueckii subsp. bulgaricus ATCC 11842	7	3	4	OG_00637411	OG_00762512	OG_00764199	OG_00871498
17201	Moorella thermoacetica ATCC 39073	7	3	4	OG_00372429	OG_00687521	OG_00743491	OG_00804286
19927	Ketogulonicigenium vulgare Y25	6	2	4	OG_00084244	OG_00372429	OG_00487027	OG_00802487
17209	Mycobacterium leprae Br4923	6	2	4	OG_00486141	OG_00743491	OG_00762512	OG_00763113
17210	Mycobacterium leprae TN	6	2	4	OG_00486141	OG_00743491	OG_00762512	OG_00763113
19985	Olsenella uli DSM 7084	6	2	4	OG_00120492	OG_00486141	OG_00778584	OG_00871498
16632	Acidimicrobium ferrooxidans DSM 10331	5	1	4	OG_00120492	OG_00486141	OG_00802794	OG_00828057
16805	Campylobacter hominis ATCC BAA-381	5	1	4	OG_00486269	OG_00763889	OG_00776156	OG_00803028
16920	Cryptobacterium curtum DSM 15641	5	1	4	OG_00085192	OG_00120492	OG_00486141	OG_00499205
19940	Leadbetterella byssophila DSM 17132	5	1	4	OG_00485948	OG_00486028	OG_00586063	OG_00803966
17141	Leuconostoc citreum KM20	5	1	4	OG_00120621	OG_00487145	OG_00762512	OG_00764199
16729	Bdellovibrio bacteriovorus HD100	4	0	4	OG_00601994	OG_00777384	OG_00802959	OG_00871557
16804	Campylobacter fetus subsp. fetus 82-40	4	0	4	OG_00486269	OG_00763889	OG_00776156	OG_00803028
16806	Campylobacter jejuni RM1221	4	0	4	OG_00486269	OG_00763889	OG_00776156	OG_00803028
16809	Campylobacter jejuni subsp. jejuni 81116	4	0	4	OG_00486269	OG_00763889	OG_00776156	OG_00803028
16808	Campylobacter jejuni subsp. jejuni 81-176	4	0	4	OG_00486269	OG_00763889	OG_00776156	OG_00803028
17656	Campylobacter jejuni subsp. jejuni IA3902	4	0	4	OG_00486269	OG_00763889	OG_00776156	OG_00803028
19806	Campylobacter jejuni subsp. jejuni M1	4	0	4	OG_00486269	OG_00763889	OG_00776156	OG_00803028
16810	Campylobacter jejuni subsp. jejuni NCTC 11168	4	0	4	OG_00486269	OG_00763889	OG_00776156	OG_00803028
19807	Campylobacter jejuni subsp. jejuni S3	4	0	4	OG_00486269	OG_00763889	OG_00776156	OG_00803028
16904	Corynebacterium aurimucosum ATCC 700975	4	0	4	OG_00085192	OG_00120492	OG_00597137	OG_00802543
16905	Corynebacterium diphtheriae NCTC 13129	4	0	4	OG_00085192	OG_00120492	OG_00597137	OG_00802543
19845	Corynebacterium pseudotuberculosis 1002	4	0	4	OG_00085192	OG_00120492	OG_00597137	OG_00802543
19846	Corynebacterium pseudotuberculosis C231	4	0	4	OG_00085192	OG_00120492	OG_00597137	OG_00802543
19847	Corynebacterium pseudotuberculosis FRC41	4	0	4	OG_00085192	OG_00120492	OG_00597137	OG_00802543
19848	Corynebacterium pseudotuberculosis I19	4	0	4	OG_00085192	OG_00120492	OG_00597137	OG_00802543
16940	Desulfobacterium autotrophicum HRM2	4	0	4	OG_00084244	OG_00601994	OG_00803028	OG_00804278
16951	Desulfovibrio vulgaris DP4	4	0	4	OG_00084244	OG_00487020	OG_00763889	OG_00803028
16952	Desulfovibrio vulgaris str. 'Miyazaki F'	4	0	4	OG_00084244	OG_00487020	OG_00763889	OG_00803028
16960	Dictyoglomus thermophilum H-6-12	4	0	4	OG_00372429	OG_00487027	OG_00605287	OG_00721630
16961	Dictyoglomus turgidum DSM 6724	4	0	4	OG_00372429	OG_00487027	OG_00605287	OG_00721630
17020	Francisella tularensis subsp. holarctica LVS	4	0	4	OG_00637411	OG_00732074	OG_00803071	OG_00804224
17254	Nitratiruptor sp. SB155-2	4	0	4	OG_00486269	OG_00743491	OG_00763889	OG_00803028
17455	Sphaerobacter thermophilus DSM 20745	4	0	4	OG_00372429	OG_00486409	OG_00586063	OG_00779047
20059	Sulfurimonas autotrophica DSM 16294	4	0	4	OG_00486269	OG_00499205	OG_00763889	OG_00804224
20086	Waddlia chondrophila WSU 86-1044	4	0	4	OG_00486357	OG_00487083	OG_00636131	OG_00779047
19862	Enterobacter cloacae subsp. cloacae NCTC 9394	25	22	3	OG_00474144	OG_00486659	OG_00871433
19828	Clostridium botulinum F str. 230613	10	7	3	OG_00764199	OG_00776156	OG_00803966
16726	Bartonella quintana str. Toulouse	8	5	3	OG_00499205	OG_00499434	OG_00743491
17288	Pelotomaculum thermopropionicum SI	8	5	3	OG_00743491	OG_00776156	OG_00802959
20011	Ruminococcus albus 7	8	5	3	OG_00095538	OG_00721630	OG_00871433
20062	Thermaerobacter marianensis DSM 12885	8	5	3	OG_00372429	OG_00586063	OG_00743491
20063	Thermincola potens JR	8	5	3	OG_00372429	OG_00743491	OG_00776156
16643	Acinetobacter baumannii ATCC 17978	7	4	3	OG_00483928	OG_00499205	OG_00871557
17566	Thermoanaerobacter tengcongensis MB4	7	4	3	OG_00721630	OG_00743491	OG_00804286
16835	Carboxydothermus hydrogenoformans Z-2901	6	3	3	OG_00586063	OG_00743491	OG_00804286
17403	Salinibacter ruber DSM 13855	6	3	3	OG_00486366	OG_00700252	OG_00802962
16755	Brachybacterium faecium DSM 4810	5	2	3	OG_00120492	OG_00486141	OG_00605287
16947	Desulfovibrio desulfuricans subsp. desulfuricans str. ATCC 27774	5	2	3	OG_00486122	OG_00487020	OG_00763889
16966	Eggerthella lenta DSM 2243	5	2	3	OG_00085192	OG_00120492	OG_00486141
16985	Escherichia coli CFT073	5	2	3	OG_00802676	OG_00804544	OG_00871578
17023	Francisella tularensis subsp. mediasiatica FSC147	5	2	3	OG_00637411	OG_00803071	OG_00804224
17150	Lysinibacillus sphaericus C3-41	5	2	3	OG_00372429	OG_00486948	OG_00487008
20064	Thermoanaerobacter italicus Ab9	5	2	3	OG_00687521	OG_00743491	OG_00804286
19809	Candidatus Nitrospira defluvii	4	1	3	OG_00372429	OG_00779674	OG_00871578
16911	Corynebacterium kroppenstedtii DSM 44385	4	1	3	OG_00085192	OG_00120492	OG_00486141
16948	Desulfovibrio desulfuricans subsp. desulfuricans str. G20	4	1	3	OG_00487020	OG_00763889	OG_00803028
16949	Desulfovibrio magneticus RS-1	4	1	3	OG_00487020	OG_00763889	OG_00803028
19856	Desulfovibrio vulgaris RCH1	4	1	3	OG_00487020	OG_00763889	OG_00803028
16953	Desulfovibrio vulgaris str. Hildenborough	4	1	3	OG_00487020	OG_00763889	OG_00803028
17024	Francisella tularensis subsp. tularensis FSC198	4	1	3	OG_00637411	OG_00803071	OG_00804224
17025	Francisella tularensis subsp. tularensis SCHU S4	4	1	3	OG_00637411	OG_00803071	OG_00804224
17026	Francisella tularensis subsp. tularensis WY96-3418	4	1	3	OG_00637411	OG_00803071	OG_00804224
19925	Ilyobacter polytropus DSM 2926	4	1	3	OG_00701205	OG_00802676	OG_00804224
17117	Lactobacillus reuteri JCM 1112	4	1	3	OG_00582023	OG_00762512	OG_00764199
17120	Lactobacillus sakei subsp. sakei 23K	4	1	3	OG_00637411	OG_00732074	OG_00764199
20007	Riemerella anatipestifer DSM 15868	4	1	3	OG_00497785	OG_00586063	OG_00801347
17573	Thermodesulfovibrio yellowstonii DSM 11347	4	1	3	OG_00601994	OG_00762512	OG_00804278
16912	Corynebacterium urealyticum DSM 7109	3	0	3	OG_00120492	OG_00597137	OG_00802543
17021	Francisella tularensis subsp. holarctica FTNF002-00	3	0	3	OG_00637411	OG_00803071	OG_00804224
17661	Francisella tularensis subsp. tularensis NE061598	3	0	3	OG_00637411	OG_00803071	OG_00804224
17038	Geobacter bemidjiensis Bem	3	0	3	OG_00486269	OG_00601994	OG_00779047
17099	Kocuria rhizophila DC2201	3	0	3	OG_00688306	OG_00803071	OG_00804224
17132	Leifsonia xyli subsp. xyli str. CTCB07	3	0	3	OG_00487145	OG_00637411	OG_00871433
20058	Sulfuricurvum kujiense DSM 16994	3	0	3	OG_00486269	OG_00743491	OG_00763889
17540	Sulfurihydrogenibium azorense Az-Fu1	3	0	3	OG_00486409	OG_00499205	OG_00701205
17542	Sulfurimonas denitrificans DSM 1251	3	0	3	OG_00486269	OG_00499205	OG_00763889
17543	Sulfurospirillum deleyianum DSM 6946	3	0	3	OG_00486269	OG_00763889	OG_00803028
17544	Sulfurovum sp. NBC37-1	3	0	3	OG_00486269	OG_00763889	OG_00803028
17582	Thermosynechococcus elongatus BP-1	3	0	3	OG_00700252	OG_00701205	OG_00804278
19888	Faecalibacterium prausnitzii	17	15	2	OG_00095538	OG_00871433
19776	Bacteroides xylanisolvens XB1A	16	14	2	OG_00586063	OG_00795347
17675	Yersinia pestis D182038	15	13	2	OG_00486761	OG_00802986
17396	Rothia mucilaginosa	13	11	2	OG_00497785	OG_00804224
17559	Syntrophomonas wolfei subsp. wolfei str. Goettingen	10	8	2	OG_00372429	OG_00776156
17009	Eubacterium rectale ATCC 33656	9	7	2	OG_00776156	OG_00802959
16666	Alkaliphilus oremlandii OhILAs	8	6	2	OG_00372429	OG_00802543
16724	Bartonella grahamii as4aup	8	6	2	OG_00499434	OG_00743491
17008	Eubacterium eligens ATCC 27750	8	6	2	OG_00486222	OG_00776156
16725	Bartonella henselae str. Houston-1	7	5	2	OG_00499434	OG_00743491
16727	Bartonella tribocorum CIP 105476	7	5	2	OG_00499434	OG_00743491
17082	Heliobacterium modesticaldum Ice1	7	5	2	OG_00743491	OG_00776156
20061	Syntrophothermus lipocalidus DSM 12680	7	5	2	OG_00372429	OG_00776156
19798	Butyrivibrio proteoclasticus B316	6	4	2	OG_00721630	OG_00776156
16894	Clostridium perfringens ATCC 13124	6	4	2	OG_00486222	OG_00776156
16897	Clostridium phytofermentans ISDg	6	4	2	OG_00487043	OG_00776156
19839	Clostridium sticklandii DSM 519	6	4	2	OG_00605287	OG_00802543
16899	Clostridium thermocellum ATCC 27405	6	4	2	OG_00499205	OG_00776156
19840	Clostridium thermocellum DSM 1313	6	4	2	OG_00499205	OG_00776156
19844	Coraliomargarita akajimensis DSM 45221	6	4	2	OG_00279053	OG_00803028
20088	Xylella fastidiosa subsp. fastidiosa GB514	6	4	2	OG_00486238	OG_00486269
16641	Acinetobacter baumannii AB307-0294	5	3	2	OG_00487008	OG_00499205
17043	Geobacter sulfurreducens PCA	5	3	2	OG_00486269	OG_00601994
17121	Lactobacillus salivarius UCC118	5	3	2	OG_00762512	OG_00764199
17276	Parabacteroides distasonis ATCC 8503	5	3	2	OG_00487272	OG_00586063
17303	Prochlorococcus marinus str. AS9601	5	3	2	OG_00487027	OG_00701205
17305	Prochlorococcus marinus str. MIT 9215	5	3	2	OG_00487027	OG_00701205
17306	Prochlorococcus marinus str. MIT 9301	5	3	2	OG_00487027	OG_00701205
17308	Prochlorococcus marinus str. MIT 9312	5	3	2	OG_00487027	OG_00701205
17310	Prochlorococcus marinus str. MIT 9515	5	3	2	OG_00487027	OG_00701205
17314	Prochlorococcus marinus subsp. pastoris str. CCMP1986	5	3	2	OG_00487027	OG_00701205
16675	Anaeromyxobacter sp. K	4	2	2	OG_00486357	OG_00802962
16719	Bacteroides fragilis NCTC 9343	4	2	2	OG_00487272	OG_00586063
16924	Cyanothece sp. PCC 7425	4	2	2	OG_00486141	OG_00701205
16937	Desulfatibacillum alkenivorans AK-01	4	2	2	OG_00601994	OG_00803028
19857	Desulfurivibrio alkaliphilus AHT2	4	2	2	OG_00084244	OG_00601994
17084	Herpetosiphon aurantiacus ATCC 23779	4	2	2	OG_00487145	OG_00871557
19737	'Nostoc azollae' 0708	4	2	2	OG_00701205	OG_00802676
19994	Prevotella melaninogenica ATCC 25845	4	2	2	OG_00486321	OG_00586063
17378	Rhodothermus marinus DSM 4252	4	2	2	OG_00120492	OG_00486269
17605	Veillonella parvula DSM 2008	4	2	2	OG_00586063	OG_00804544
16645	Acinetobacter baumannii SDF	3	1	2	OG_00485818	OG_00499205
16672	Anaeromyxobacter dehalogenans 2CP-1	3	1	2	OG_00486357	OG_00802962
16704	Bacillus cereus ATCC 14579	3	1	2	OG_00486996	OG_00803071
16873	Clavibacter michiganensis subsp. michiganensis NCPPB 382	3	1	2	OG_00487145	OG_00871433
16874	Clavibacter michiganensis subsp. sepedonicus	3	1	2	OG_00487145	OG_00871433
16910	Corynebacterium jeikeium K411	3	1	2	OG_00120492	OG_00597137
16927	Cytophaga hutchinsonii ATCC 33406	3	1	2	OG_00486028	OG_00586063
16941	Desulfococcus oleovorans Hxd3	3	1	2	OG_00084244	OG_00601994
16942	Desulfohalobium retbaense DSM 5692	3	1	2	OG_00487020	OG_00803028
16943	Desulfomicrobium baculatum DSM 4028	3	1	2	OG_00487020	OG_00803028
16950	Desulfovibrio salexigens DSM 2638	3	1	2	OG_00487020	OG_00803028
16963	Dyadobacter fermentans DSM 18053	3	1	2	OG_00486028	OG_00586063
19898	Geobacter sulfurreducens KN400	3	1	2	OG_00486269	OG_00601994
17044	Geobacter uraniireducens Rf4	3	1	2	OG_00486269	OG_00601994
17045	Gloeobacter violaceus PCC 7421	3	1	2	OG_00700252	OG_00701205
17052	Haemophilus ducreyi 35000HP	3	1	2	OG_00801347	OG_00871498
17115	Lactobacillus plantarum WCFS1	3	1	2	OG_00762512	OG_00764199
19949	Marivirga tractuosa DSM 4126	3	1	2	OG_00486028	OG_00586063
17307	Prochlorococcus marinus str. MIT 9303	3	1	2	OG_00486409	OG_00701205
17309	Prochlorococcus marinus str. MIT 9313	3	1	2	OG_00486409	OG_00701205
19997	Propionibacterium freudenreichii subsp. shermanii CIP 103027	3	1	2	OG_00120492	OG_00803071
20010	Rothia dentocariosa ATCC 17931	3	1	2	OG_00497785	OG_00804224
17458	Spirosoma linguale DSM 74	3	1	2	OG_00486028	OG_00586063
17503	Streptococcus pyogenes M1 GAS	3	1	2	OG_00637411	OG_00732074
20056	Streptomyces bingchenggensis BCW-1	3	1	2	OG_00487043	OG_00763113
17553	Synechococcus sp. PCC 7002	3	1	2	OG_00486409	OG_00701205
17557	Synechocystis sp. PCC 6803	3	1	2	OG_00486409	OG_00701205
16634	Acidithiobacillus ferrooxidans ATCC 23270	2	0	2	OG_00701205	OG_00763889
16673	Anaeromyxobacter dehalogenans 2CP-C	2	0	2	OG_00486357	OG_00802962
16674	Anaeromyxobacter sp. Fw109-5	2	0	2	OG_00486357	OG_00802962
16684	Arcobacter butzleri RM4018	2	0	2	OG_00486269	OG_00763889
19757	Arcobacter nitrofigilis DSM 7299	2	0	2	OG_00486269	OG_00763889
16819	Candidatus Hamiltonella defensa 5AT (Acyrthosiphon pisum)	2	0	2	OG_00486409	OG_00801347
16859	Chlorobium limicola DSM 245	2	0	2	OG_00499205	OG_00778648
16861	Chlorobium phaeobacteroides BS1	2	0	2	OG_00486222	OG_00499205
16906	Corynebacterium efficiens YS-314	2	0	2	OG_00120492	OG_00597137
16907	Corynebacterium glutamicum ATCC 13032	2	0	2	OG_00120492	OG_00597137
16908	Corynebacterium glutamicum ATCC 13032	2	0	2	OG_00120492	OG_00597137
16909	Corynebacterium glutamicum R	2	0	2	OG_00120492	OG_00597137
16922	Cyanothece sp. ATCC 51142	2	0	2	OG_00486409	OG_00701205
19850	Cyanothece sp. PCC 7822	2	0	2	OG_00700252	OG_00701205
17018	Francisella novicida U112	2	0	2	OG_00803071	OG_00804224
17019	Francisella philomiragia subsp. philomiragia ATCC 25017	2	0	2	OG_00803071	OG_00804224
17027	Frankia alni ACN14a	2	0	2	OG_00485948	OG_00688306
17039	Geobacter lovleyi SZ	2	0	2	OG_00486269	OG_00601994
17040	Geobacter metallireducens GS-15	2	0	2	OG_00486269	OG_00601994
17041	Geobacter sp. FRC-32	2	0	2	OG_00486269	OG_00601994
17042	Geobacter sp. M21	2	0	2	OG_00486269	OG_00601994
17114	Lactobacillus plantarum JDM1	2	0	2	OG_00762512	OG_00764199
19936	Lactobacillus plantarum subsp. plantarum ST-III	2	0	2	OG_00762512	OG_00764199
17199	Micrococcus luteus NCTC 2665	2	0	2	OG_00688306	OG_00804224
17285	Pelobacter carbinolicus DSM 2380	2	0	2	OG_00486269	OG_00601994
17286	Pelobacter propionicus DSM 2379	2	0	2	OG_00486269	OG_00601994
17289	Persephonella marina EX-H1	2	0	2	OG_00486409	OG_00701205
17454	Sorangium cellulosum 'So ce 56'	2	0	2	OG_00486141	OG_00802962
17491	Streptococcus mutans UA159	2	0	2	OG_00486197	OG_00803943
17504	Streptococcus pyogenes MGAS10270	2	0	2	OG_00637411	OG_00732074
17505	Streptococcus pyogenes MGAS10394	2	0	2	OG_00637411	OG_00732074
17506	Streptococcus pyogenes MGAS10750	2	0	2	OG_00637411	OG_00732074
17507	Streptococcus pyogenes MGAS2096	2	0	2	OG_00637411	OG_00732074
17508	Streptococcus pyogenes MGAS315	2	0	2	OG_00637411	OG_00732074
17509	Streptococcus pyogenes MGAS5005	2	0	2	OG_00637411	OG_00732074
17510	Streptococcus pyogenes MGAS6180	2	0	2	OG_00637411	OG_00732074
17511	Streptococcus pyogenes MGAS8232	2	0	2	OG_00637411	OG_00732074
17512	Streptococcus pyogenes MGAS9429	2	0	2	OG_00637411	OG_00732074
17513	Streptococcus pyogenes NZ131	2	0	2	OG_00637411	OG_00732074
17514	Streptococcus pyogenes SSI-1	2	0	2	OG_00637411	OG_00732074
17515	Streptococcus pyogenes str. Manfredo	2	0	2	OG_00637411	OG_00732074
17541	Sulfurihydrogenibium sp. YO3AOP1	2	0	2	OG_00486409	OG_00701205
17558	Syntrophobacter fumaroxidans MPOB	2	0	2	OG_00084244	OG_00601994
17598	Trichodesmium erythraeum IMS101	2	0	2	OG_00700252	OG_00701205
17472	Staphylococcus aureus subsp. aureus USA300_TCH1516	18	17	1	OG_00485983
17674	Yersinia pestis D106004	12	11	1	OG_00802986
20089	Yersinia pestis Z176003	12	11	1	OG_00802986
16665	Alkaliphilus metalliredigens QYMF	6	5	1	OG_00605287
16758	Bradyrhizobium sp. BTAi1	6	5	1	OG_00486238
16876	Clostridium beijerinckii NCIMB 8052	6	5	1	OG_00776156
16887	Clostridium cellulolyticum H10	6	5	1	OG_00776156
16888	Clostridium difficile 630	6	5	1	OG_00802543
16890	Clostridium difficile R20291	6	5	1	OG_00802543
19837	Clostridium perfringens SM101	6	5	1	OG_00486222
16896	Clostridium perfringens str. 13	6	5	1	OG_00776156
16946	Desulfotomaculum reducens MI-1	6	5	1	OG_00776156
17278	Parvibaculum lavamentivorans DS-1	6	5	1	OG_00804361
17355	Rhizobium etli CFN 42	6	5	1	OG_00597137
17371	Rhodopseudomonas palustris BisB18	6	5	1	OG_00486238
20005	Rhodopseudomonas palustris DX-1	6	5	1	OG_00486238
20067	Thermoanaerobacterium thermosaccharolyticum DSM 571	6	5	1	OG_00743491
16722	Bacteroides vulgatus ATCC 8482	5	4	1	OG_00586063
19815	Caulobacter segnis ATCC 21756	5	4	1	OG_00871578
16880	Clostridium botulinum A2 str. Kyoto	5	4	1	OG_00776156
16881	Clostridium botulinum A3 str. Loch Maree	5	4	1	OG_00776156
16882	Clostridium botulinum B str. Eklund 17B	5	4	1	OG_00776156
16884	Clostridium botulinum Ba4 str. 657	5	4	1	OG_00776156
16885	Clostridium botulinum E3 str. Alaska E43	5	4	1	OG_00776156
16886	Clostridium botulinum F str. Langeland	5	4	1	OG_00776156
16889	Clostridium difficile CD196	5	4	1	OG_00802543
16945	Desulfotomaculum acetoxidans DSM 771	5	4	1	OG_00776156
17545	Symbiobacterium thermophilum IAM 14863	5	4	1	OG_00586063
16648	Actinobacillus pleuropneumoniae serovar 3 str. JL03	4	3	1	OG_00687521
16686	Arthrobacter aurescens TC1	4	3	1	OG_00804224
16865	Chloroflexus aggregans DSM 9485	4	3	1	OG_00802959
16866	Chloroflexus aurantiacus J-10-fl	4	3	1	OG_00486366
19838	Clostridium saccharolyticum WM1	4	3	1	OG_00095538
19867	Erwinia pyrifoliae DSM 12163	4	3	1	OG_00487053
17105	Lactobacillus casei ATCC 334	4	3	1	OG_00764199
19931	Lactobacillus casei str. Zhang	4	3	1	OG_00764199
17123	Lactococcus lactis subsp. cremoris SK11	4	3	1	OG_00085192
17259	Nitrosomonas eutropha C91	4	3	1	OG_00804133
17311	Prochlorococcus marinus str. NATL1A	4	3	1	OG_00701205
17312	Prochlorococcus marinus str. NATL2A	4	3	1	OG_00701205
20090	Zunongwangia profunda SM-A87	4	3	1	OG_00586063
16631	Acidaminococcus fermentans DSM 20731	3	2	1	OG_00586063
16714	Bacillus pumilus SAFR-032	3	2	1	OG_00486482
19775	Bacteroides fragilis 638R	3	2	1	OG_00586063
16720	Bacteroides fragilis YCH46	3	2	1	OG_00586063
16721	Bacteroides thetaiotaomicron VPI-5482	3	2	1	OG_00586063
16781	Burkholderia cenocepacia J2315	3	2	1	OG_00279053
16793	Burkholderia pseudomallei 1710b	3	2	1	OG_00279053
16857	Chlorobaculum parvum NCIB 8327	3	2	1	OG_00499205
16902	Conexibacter woesei DSM 14684	3	2	1	OG_00279053
16956	Dichelobacter nodosus VCS1703A	3	2	1	OG_00801347
17051	Granulibacter bethesdensis CGDNIH1	3	2	1	OG_00486761
17106	Lactobacillus casei BL23	3	2	1	OG_00764199
17119	Lactobacillus rhamnosus Lc 705	3	2	1	OG_00764199
19948	Maribacter sp. HTCC2170	3	2	1	OG_00586063
17200	Microcystis aeruginosa NIES-843	3	2	1	OG_00701205
17300	Polynucleobacter necessarius subsp. necessarius STIR1	3	2	1	OG_00486269
19995	Prevotella ruminicola 23	3	2	1	OG_00586063
17313	Prochlorococcus marinus subsp. marinus str. CCMP1375	3	2	1	OG_00701205
16628	Acaryochloris marina MBIC11017	2	1	1	OG_00701205
19745	Acetohalobium arabaticum DSM 5501	2	1	1	OG_00802962
19746	Achromobacter xylosoxidans A8	2	1	1	OG_00279053
16637	Acidothermus cellulolyticus 11B	2	1	1	OG_00763113
19749	Acinetobacter sp. DR1	2	1	1	OG_00499205
19758	Arthrobacter arilaitensis Re117	2	1	1	OG_00804224
16687	Arthrobacter chlorophenolicus A6	2	1	1	OG_00804224
16688	Arthrobacter sp. FB24	2	1	1	OG_00804224
19759	Arthrospira platensis NIES-39	2	1	1	OG_00701205
19769	Bacillus selenitireducens MLS10	2	1	1	OG_00743491
16743	Bordetella bronchiseptica RB50	2	1	1	OG_00279053
16785	Burkholderia mallei NCTC 10229	2	1	1	OG_00279053
16792	Burkholderia pseudomallei 1106a	2	1	1	OG_00279053
16794	Burkholderia pseudomallei 668	2	1	1	OG_00279053
16795	Burkholderia pseudomallei K96243	2	1	1	OG_00279053
16822	Candidatus Koribacter versatilis Ellin345	2	1	1	OG_00486141
16842	Chitinophaga pinensis DSM 2588	2	1	1	OG_00586063
16860	Chlorobium luteolum DSM 273	2	1	1	OG_00499205
16864	Chlorobium tepidum TLS	2	1	1	OG_00499205
19849	Croceibacter atlanticus HTCC2559	2	1	1	OG_00586063
16923	Cyanothece sp. PCC 7424	2	1	1	OG_00701205
16925	Cyanothece sp. PCC 8801	2	1	1	OG_00701205
16926	Cyanothece sp. PCC 8802	2	1	1	OG_00701205
17017	Flavobacterium psychrophilum JIP02/86	2	1	1	OG_00586063
17028	Frankia sp. CcI3	2	1	1	OG_00485948
17029	Frankia sp. EAN1pec	2	1	1	OG_00763113
17056	Haemophilus influenzae Rd KW20	2	1	1	OG_00486238
19905	Halanaerobium praevalens DSM 2228	2	1	1	OG_00776156
19906	Halanaerobium sp. 'sapolanicus'	2	1	1	OG_00776156
17061	Haliangium ochraceum DSM 14365	2	1	1	OG_00486409
17071	Halothermothrix orenii H 168	2	1	1	OG_00721630
17118	Lactobacillus rhamnosus GG	2	1	1	OG_00764199
19937	Lactobacillus rhamnosus GG	2	1	1	OG_00764199
17126	Laribacter hongkongensis HLHK9	2	1	1	OG_00499205
17242	Natranaerobius thermophilus JW/NM-WN-LF	2	1	1	OG_00743491
19980	Neisseria meningitidis alpha710	2	1	1	OG_00486869
17258	Nitrosomonas europaea ATCC 19718	2	1	1	OG_00804133
19988	Paludibacter propionicigenes WB4	2	1	1	OG_00586063
17284	Pedobacter heparinus DSM 2366	2	1	1	OG_00586063
17287	Pelodictyon phaeoclathratiforme BU-1	2	1	1	OG_00499205
17304	Prochlorococcus marinus str. MIT 9211	2	1	1	OG_00701205
17316	Prosthecochloris aestuarii DSM 271	2	1	1	OG_00499205
17397	Rubrobacter xylanophilus DSM 9941	2	1	1	OG_00762512
17456	Sphingomonas wittichii RW1	2	1	1	OG_00006771
17489	Streptococcus equi subsp. zooepidemicus MGCS10565	2	1	1	OG_00637411
17546	Synechococcus elongatus PCC 6301	2	1	1	OG_00701205
17547	Synechococcus elongatus PCC 7942	2	1	1	OG_00701205
17548	Synechococcus sp. CC9311	2	1	1	OG_00701205
17549	Synechococcus sp. CC9605	2	1	1	OG_00701205
17550	Synechococcus sp. CC9902	2	1	1	OG_00701205
17551	Synechococcus sp. JA-2-3B'a(2-13)	2	1	1	OG_00701205
17552	Synechococcus sp. JA-3-3Ab	2	1	1	OG_00701205
17554	Synechococcus sp. RCC307	2	1	1	OG_00701205
17555	Synechococcus sp. WH 7803	2	1	1	OG_00701205
17556	Synechococcus sp. WH 8102	2	1	1	OG_00701205
20074	Thiomonas intermedia K12	2	1	1	OG_00279053
20084	Vibrio furnissii NCTC 11218	2	1	1	OG_00487053
16635	Acidithiobacillus ferrooxidans ATCC 53993	1	0	1	OG_00763889
16636	Acidobacterium capsulatum ATCC 51196	1	0	1	OG_00486141
16640	Acinetobacter baumannii AB0057	1	0	1	OG_00499205
16642	Acinetobacter baumannii ACICU	1	0	1	OG_00499205
16644	Acinetobacter baumannii AYE	1	0	1	OG_00499205
16646	Acinetobacter baylyi ADP1	1	0	1	OG_00499205
20795	Acinetobacter calcoaceticus PHEA-2	1	0	1	OG_00499205
16662	Alicyclobacillus acidocaldarius subsp. acidocaldarius DSM 446	1	0	1	OG_00743491
16711	Bacillus halodurans C-125	1	0	1	OG_00743491
16777	Burkholderia ambifaria AMMD	1	0	1	OG_00279053
16778	Burkholderia ambifaria MC40-6	1	0	1	OG_00279053
16782	Burkholderia cenocepacia MC0-3	1	0	1	OG_00279053
16784	Burkholderia mallei ATCC 23344	1	0	1	OG_00279053
16786	Burkholderia mallei NCTC 10247	1	0	1	OG_00279053
16787	Burkholderia mallei SAVP1	1	0	1	OG_00279053
16791	Burkholderia phytofirmans PsJN	1	0	1	OG_00279053
16796	Burkholderia sp. 383	1	0	1	OG_00279053
16797	Burkholderia thailandensis E264	1	0	1	OG_00279053
16799	Burkholderia xenovorans LB400	1	0	1	OG_00279053
19804	Calditerrivibrio nitroreducens DSM 19672	1	0	1	OG_00601994
16834	Capnocytophaga ochracea DSM 7271	1	0	1	OG_00586063
16858	Chlorobium chlorochromatii CaD3	1	0	1	OG_00499205
16862	Chlorobium phaeobacteroides DSM 266	1	0	1	OG_00499205
16863	Chlorobium phaeovibrioides DSM 265	1	0	1	OG_00499205
19841	Comamonas testosteroni CNB-1	1	0	1	OG_00279053
19851	Deferribacter desulfuricans SSM1	1	0	1	OG_00601994
19854	Denitrovibrio acetiphilus DSM 12809	1	0	1	OG_00601994
19855	Desulfarculus baarsii DSM 2075	1	0	1	OG_00084244
16978	Escherichia coli 536	1	0	1	OG_00792356
19879	Escherichia coli UM146	1	0	1	OG_00871756
17015	Flavobacteriaceae bacterium 3519-10	1	0	1	OG_00586063
17016	Flavobacterium johnsoniae UW101	1	0	1	OG_00586063
19893	Frankia sp. EuI1c	1	0	1	OG_00485948
17050	Gramella forsetii KT0803	1	0	1	OG_00586063
17083	Herminiimonas arsenicoxydans	1	0	1	OG_00279053
17092	Janthinobacterium sp. Marseille	1	0	1	OG_00279053
17093	Jonesia denitrificans DSM 20603	1	0	1	OG_00688306
17094	Kangiella koreensis DSM 16069	1	0	1	OG_00372429
17122	Lactococcus lactis subsp. cremoris MG1363	1	0	1	OG_00085192
19939	Lactococcus lactis subsp. cremoris NZ9000	1	0	1	OG_00085192
17124	Lactococcus lactis subsp. lactis Il1403	1	0	1	OG_00085192
17125	Lactococcus lactis subsp. lactis KF147	1	0	1	OG_00085192
17139	Leptothrix cholodnii SP-6	1	0	1	OG_00279053
17152	Magnetococcus sp. MC-1	1	0	1	OG_00601994
17155	Maricaulis maris MCS10	1	0	1	OG_00499205
19967	Moraxella catarrhalis RH4	1	0	1	OG_00499205
17239	Myxococcus xanthus DK 1622	1	0	1	OG_00486357
18592	Neisseria lactamica ST-640	1	0	1
17264	Nostoc punctiforme PCC 73102	1	0	1	OG_00701205
19986	Paenibacillus polymyxa E681	1	0	1	OG_00802959
19992	Parvularcula bermudensis HTCC2503	1	0	1	OG_00499205
17298	Polaromonas sp. JS666	1	0	1	OG_00279053
17299	Polynucleobacter necessarius subsp. asymbioticus QLW-P1DMWA-1	1	0	1	OG_00279053
17337	Psychrobacter arcticus 273-4	1	0	1	OG_00499205
17338	Psychrobacter cryohalolentis K5	1	0	1	OG_00499205
17339	Psychrobacter sp. PRwf-1	1	0	1	OG_00499205
17348	Ralstonia eutropha H16	1	0	1	OG_00279053
17353	Ralstonia solanacearum GMI1000	1	0	1	OG_00279053
17392	Robiginitalea biformata HTCC2501	1	0	1	OG_00586063
20020	Segniliparus rotundus DSM 44985	1	0	1	OG_00120492
17443	Shigella boydii CDC 3083-94	1	0	1	OG_00487027
17444	Shigella boydii Sb227	1	0	1	OG_00778648
20027	Stackebrandtia nassauensis DSM 44728	1	0	1	OG_00778584
20034	Staphylococcus aureus subsp. aureus str. JKD6008	1	0	1	OG_00779047
20038	Stigmatella aurantiaca DW4/3-1	1	0	1	OG_00486357
17483	Streptococcus agalactiae 2603V/R	1	0	1	OG_00637411
17484	Streptococcus agalactiae A909	1	0	1	OG_00637411
17485	Streptococcus agalactiae NEM316	1	0	1	OG_00637411
17486	Streptococcus dysgalactiae subsp. equisimilis GGS_124	1	0	1	OG_00637411
17487	Streptococcus equi subsp. equi 4047	1	0	1	OG_00637411
17488	Streptococcus equi subsp. zooepidemicus	1	0	1	OG_00637411
17606	Verminephrobacter eiseniae EF01-2	1	0	1	OG_00279053
17616	Vibrio splendidus LGP32	1	0	1	OG_00486359
16980	Escherichia coli APEC O1	10	10	0
17246	Neisseria gonorrhoeae NCCP11945	10	10	0
17360	Sinorhizobium fredii NGR234	9	9	0
17004	Escherichia coli str. K-12 substr. DH10B	7	7	0
17151	Macrococcus caseolyticus JCSC5402	7	7	0
16657	Agrobacterium radiobacter K84	6	6	0
16658	Agrobacterium tumefaciens str. C58	6	6	0
16659	Agrobacterium vitis S4	6	6	0
16692	Azorhizobium caulinodans ORS 571	6	6	0
16763	Brucella canis ATCC 23365	6	6	0
16765	Brucella melitensis biovar Abortus 2308	6	6	0
16770	Brucella suis ATCC 23445	6	6	0
16877	Clostridium botulinum A str. ATCC 19397	6	6	0
16974	Enterococcus faecalis V583	6	6	0
17193	Methylobacterium radiotolerans JCM 2831	6	6	0
17255	Nitrobacter hamburgensis X14	6	6	0
17256	Nitrobacter winogradskyi Nb-255	6	6	0
17270	Oligotropha carboxidovorans OM5	6	6	0
17356	Rhizobium etli CIAT 652	6	6	0
17358	Rhizobium leguminosarum bv. trifolii WSM2304	6	6	0
17370	Rhodopseudomonas palustris BisA53	6	6	0
17372	Rhodopseudomonas palustris BisB5	6	6	0
17373	Rhodopseudomonas palustris CGA009	6	6	0
17374	Rhodopseudomonas palustris HaA2	6	6	0
17375	Rhodopseudomonas palustris TIE-1	6	6	0
17631	Xanthomonas oryzae pv. oryzae KACC10331	6	6	0
19772	Bacillus thuringiensis BMB171	5	5	0
16730	Beijerinckia indica subsp. indica ATCC 9039	5	5	0
16757	Bradyrhizobium japonicum USDA 110	5	5	0
16759	Bradyrhizobium sp. ORS278	5	5	0
16762	Brucella abortus bv. 1 str. 9-941	5	5	0
16761	Brucella abortus S19	5	5	0
16764	Brucella melitensis ATCC 23457	5	5	0
16766	Brucella melitensis bv. 1 str. 16M	5	5	0
16767	Brucella microti CCM 4915	5	5	0
16768	Brucella ovis ATCC 25840	5	5	0
16769	Brucella suis 1330	5	5	0
16871	Citrobacter koseri ATCC BAA-895	5	5	0
16878	Clostridium botulinum A str. ATCC 3502	5	5	0
16879	Clostridium botulinum A str. Hall	5	5	0
16883	Clostridium botulinum B1 str. Okra	5	5	0
16918	Cronobacter sakazakii ATCC BAA-894	5	5	0
19923	Hyphomicrobium denitrificans ATCC 51888	5	5	0
17187	Methylobacterium chloromethanicum CM4	5	5	0
17188	Methylobacterium extorquens AM1	5	5	0
17189	Methylobacterium extorquens DM4	5	5	0
17190	Methylobacterium extorquens PA1	5	5	0
17191	Methylobacterium nodulans ORS 2060	5	5	0
17192	Methylobacterium populi BJ001	5	5	0
17194	Methylobacterium sp. 4-46	5	5	0
17195	Methylocella silvestris BL2	5	5	0
17203	Mycobacterium avium 104	5	5	0
20004	Rhodomicrobium vannielii ATCC 17100	5	5	0
17450	Sinorhizobium medicae WSM419	5	5	0
17451	Sinorhizobium meliloti 1021	5	5	0
20037	Starkeya novella DSM 506	5	5	0
17625	Xanthobacter autotrophicus Py2	5	5	0
16695	Bacillus anthracis str. 'Ames Ancestor'	4	4	0
19770	Bacillus subtilis subsp. natto BEST195	4	4	0
16841	Chelativorans sp. BNC1	4	4	0
19829	Clostridium cellulovorans 743B	4	4	0
16891	Clostridium kluyveri DSM 555	4	4	0
16892	Clostridium kluyveri NBRC 12016	4	4	0
19836	Clostridium ljungdahlii DSM 13528	4	4	0
16893	Clostridium novyi NT	4	4	0
16939	Desulfitobacterium hafniense Y51	4	4	0
16964	Edwardsiella ictaluri 93-146	4	4	0
17159	Mesorhizobium loti MAFF303099	4	4	0
17221	Mycobacterium ulcerans Agy99	4	4	0
17268	Ochrobactrum anthropi ATCC 49188	4	4	0
17331	Pseudomonas putida KT2440	4	4	0
17357	Rhizobium leguminosarum bv. trifolii WSM1325	4	4	0
17359	Rhizobium leguminosarum bv. viciae 3841	4	4	0
17433	Shewanella oneidensis MR-1	4	4	0
19750	Aggregatibacter actinomycetemcomitans D11S-1	3	3	0
16867	Chloroflexus sp. Y-400-fl	3	3	0
16875	Clostridium acetobutylicum ATCC 824	3	3	0
16938	Desulfitobacterium hafniense DCB-2	3	3	0
16965	Edwardsiella tarda EIB202	3	3	0
17096	Klebsiella pneumoniae 342	3	3	0
17153	Magnetospirillum magneticum AMB-1	3	3	0
17393	Roseiflexus castenholzii DSM 13941	3	3	0
17394	Roseiflexus sp. RS-1	3	3	0
17406	Salmonella enterica subsp. arizonae serovar 62:z4,z23:-- str. RSK2980	3	3	0
17416	Salmonella enterica subsp. enterica serovar Paratyphi B str. SPB7	3	3	0
17448	Shigella flexneri 5 str. 8401	3	3	0
17643	Yersinia pestis KIM 10	3	3	0
16647	Actinobacillus pleuropneumoniae serovar 5b str. L20	2	2	0
16656	Aggregatibacter aphrophilus NJ8700	2	2	0
16663	Aliivibrio salmonicida LFI1238	2	2	0
16708	Bacillus cereus Q1	2	2	0
16742	Bordetella avium 197N	2	2	0
16744	Bordetella parapertussis 12822	2	2	0
16745	Bordetella pertussis Tohama I	2	2	0
16746	Bordetella petrii DSM 12804	2	2	0
19816	Cellulomonas flavigena DSM 20109	2	2	0
16914	Coxiella burnetii CbuK_Q154	2	2	0
19868	Erwinia pyrifoliae Ep1/96	2	2	0
19871	Escherichia coli ABU 83972	2	2	0
16986	Escherichia coli E24377A	2	2	0
19942	Legionella pneumophila 130b	2	2	0
17131	Legionella pneumophila subsp. pneumophila str. Philadelphia 1	2	2	0
17185	Methylibium petroleiphilum PM1	2	2	0
17204	Mycobacterium avium subsp. paratuberculosis K-10	2	2	0
17216	Mycobacterium tuberculosis CDC1551	2	2	0
17245	Neisseria gonorrhoeae FA 1090	2	2	0
17250	Neisseria meningitidis Z2491	2	2	0
17349	Ralstonia eutropha JMP134	2	2	0
17351	Ralstonia pickettii 12D	2	2	0
17354	Renibacterium salmoninarum ATCC 33209	2	2	0
17395	Roseobacter denitrificans OCh 114	2	2	0
17407	Salmonella enterica subsp. enterica serovar Agona str. SL483	2	2	0
17409	Salmonella enterica subsp. enterica serovar Dublin str. CT_02021853	2	2	0
17412	Salmonella enterica subsp. enterica serovar Heidelberg str. SL476	2	2	0
17418	Salmonella enterica subsp. enterica serovar Schwarzengrund str. CVM19633	2	2	0
17459	Staphylococcus aureus RF122	2	2	0
17501	Streptococcus pneumoniae TIGR4	2	2	0
17591	Thioalkalivibrio sp. HL-EbGR7	2	2	0
17613	Vibrio harveyi ATCC BAA-1116	2	2	0
16629	Acetobacter pasteurianus IFO 3283-01	1	1	0
19738	Acetobacter pasteurianus IFO 3283-01-42C	1	1	0
19739	Acetobacter pasteurianus IFO 3283-03	1	1	0
19740	Acetobacter pasteurianus IFO 3283-07	1	1	0
19741	Acetobacter pasteurianus IFO 3283-12	1	1	0
19742	Acetobacter pasteurianus IFO 3283-22	1	1	0
19743	Acetobacter pasteurianus IFO 3283-26	1	1	0
19744	Acetobacter pasteurianus IFO 3283-32	1	1	0
16633	Acidiphilium cryptum JF-5	1	1	0
16638	Acidovorax citrulli AAC00-1	1	1	0
16955	Acidovorax ebreus TPSY	1	1	0
16639	Acidovorax sp. JS42	1	1	0
16653	Aeromonas salmonicida subsp. salmonicida A449	1	1	0
16685	Aromatoleum aromaticum EbN1	1	1	0
16691	Azoarcus sp. BH72	1	1	0
16696	Bacillus anthracis str. A0248	1	1	0
16702	Bacillus cereus AH820	1	1	0
16717	Bacillus thuringiensis str. Al Hakam	1	1	0
16731	Beutenbergia cavernae DSM 12333	1	1	0
16779	Burkholderia cenocepacia AU 1054	1	1	0
16780	Burkholderia cenocepacia HI2424	1	1	0
16783	Burkholderia glumae BGR1	1	1	0
16788	Burkholderia multivorans ATCC 17616	1	1	0
16789	Burkholderia multivorans ATCC 17616	1	1	0
16790	Burkholderia phymatum STM815	1	1	0
19795	Burkholderia sp. CCGE1002	1	1	0
19796	Burkholderia sp. CCGE1003	1	1	0
16798	Burkholderia vietnamiensis G4	1	1	0
16812	Candidatus Accumulibacter phosphatis clade IIA str. UW-1	1	1	0
16837	Caulobacter crescentus CB15	1	1	0
16869	Chromobacterium violaceum ATCC 12472	1	1	0
16913	Coxiella burnetii CbuG_Q212	1	1	0
17350	Cupriavidus metallidurans CH34	1	1	0
16921	Cupriavidus taiwanensis	1	1	0
16928	Dechloromonas aromatica RCB	1	1	0
16936	Delftia acidovorans SPH-1	1	1	0
19869	Erwinia sp. Ejp617	1	1	0
16976	Erwinia tasmaniensis Et1/99	1	1	0
19870	Escherichia coli 042	1	1	0
16979	Escherichia coli 55989	1	1	0
16982	Escherichia coli B str. REL606	1	1	0
16987	Escherichia coli ED1a	1	1	0
16989	Escherichia coli IAI1	1	1	0
16990	Escherichia coli IAI39	1	1	0
16995	Escherichia coli O157:H7 str. EC4115	1	1	0
16999	Escherichia coli S88	1	1	0
17002	Escherichia coli UMN026	1	1	0
17007	Escherichia fergusonii ATCC 35469	1	1	0
17033	Geobacillus kaustophilus HTA426	1	1	0
19897	Geobacillus sp. Y4.1MC1	1	1	0
17037	Geobacillus thermodenitrificans NG80-2	1	1	0
17046	Gluconacetobacter diazotrophicus PAl 5	1	1	0
17047	Gluconacetobacter diazotrophicus PAl 5	1	1	0
17048	Gluconobacter oxydans 621H	1	1	0
17049	Gordonia bronchialis DSM 43247	1	1	0
19909	Halomonas elongata DSM 2581	1	1	0
19920	Herbaspirillum seropedicae SmR1	1	1	0
17089	Idiomarina loihiensis L2TR	1	1	0
19926	Intrasporangium calvum DSM 43043	1	1	0
17095	Kineococcus radiotolerans SRS30216	1	1	0
19928	Klebsiella pneumoniae NTUH-K2044	1	1	0
17098	Klebsiella pneumoniae subsp. pneumoniae MGH 78578	1	1	0
19929	Klebsiella variicola At-22	1	1	0
17101	Kribbella flavida DSM 17836	1	1	0
17102	Kytococcus sedentarius DSM 20547	1	1	0
17140	Leptotrichia buccalis C-1013-b	1	1	0
17154	Mannheimia succiniciproducens MBEL55E	1	1	0
17196	Methylococcus capsulatus str. Bath	1	1	0
17202	Mycobacterium abscessus ATCC 19977	1	1	0
17205	Mycobacterium bovis AF2122/97	1	1	0
17206	Mycobacterium bovis BCG str. Pasteur 1173P2	1	1	0
17207	Mycobacterium bovis BCG str. Tokyo 172	1	1	0
17208	Mycobacterium gilvum PYR-GCK	1	1	0
17211	Mycobacterium marinum M	1	1	0
17212	Mycobacterium smegmatis str. MC2 155	1	1	0
17213	Mycobacterium sp. JLS	1	1	0
17214	Mycobacterium sp. KMS	1	1	0
17215	Mycobacterium sp. MCS	1	1	0
19968	Mycobacterium sp. Spyr1	1	1	0
17217	Mycobacterium tuberculosis F11	1	1	0
17218	Mycobacterium tuberculosis H37Ra	1	1	0
17219	Mycobacterium tuberculosis H37Rv	1	1	0
17220	Mycobacterium tuberculosis KZN 1435	1	1	0
17222	Mycobacterium vanbaalenii PYR-1	1	1	0
17247	Neisseria meningitidis 053442	1	1	0
19979	Neisseria meningitidis 8013	1	1	0
17251	Neisseria meningitidis alpha14	1	1	0
17248	Neisseria meningitidis FAM18	1	1	0
17249	Neisseria meningitidis MC58	1	1	0
17261	Nitrosospira multiformis ATCC 25196	1	1	0
17263	Nocardioides sp. JS614	1	1	0
17275	Paenibacillus sp. JDR-2	1	1	0
17035	Paenibacillus sp. Y412MC10	1	1	0
17277	Paracoccus denitrificans PD1222	1	1	0
17282	Pectobacterium wasabiae WPP163	1	1	0
17292	Photobacterium profundum SS9	1	1	0
17293	Photorhabdus asymbiotica	1	1	0
17297	Polaromonas naphthalenivorans CJ2	1	1	0
17315	Propionibacterium acnes KPA171202	1	1	0
19996	Propionibacterium acnes SK137	1	1	0
17333	Pseudomonas stutzeri A1501	1	1	0
17352	Ralstonia pickettii 12J	1	1	0
17368	Rhodoferax ferrireducens T118	1	1	0
17400	Saccharomonospora viridis DSM 43017	1	1	0
17408	Salmonella enterica subsp. enterica serovar Choleraesuis str. SC-B67	1	1	0
17413	Salmonella enterica subsp. enterica serovar Newport str. SL254	1	1	0
18594	Salmonella enterica subsp. enterica serovar Typhimurium DT104 NCTC 13348	1	1	0
20019	Sanguibacter keddieii DSM 10542	1	1	0
17422	Sebaldella termitidis ATCC 33386	1	1	0
17438	Shewanella sp. ANA-3	1	1	0
17447	Shigella flexneri 2a str. 301	1	1	0
17453	Sodalis glossinidius str. 'morsitans'	1	1	0
17470	Staphylococcus aureus subsp. aureus NCTC 8325	1	1	0
17490	Streptococcus gordonii str. Challis substr. CH1	1	1	0
20044	Streptococcus pneumoniae INV104	1	1	0
17499	Streptococcus pneumoniae P1031	1	1	0
17519	Streptococcus suis BM407	1	1	0
17523	Streptococcus thermophilus LMD-9	1	1	0
17560	Syntrophus aciditrophicus SB	1	1	0
17561	Teredinibacter turnerae T7901	1	1	0
17562	Thauera sp. MZ1T	1	1	0
20078	Variovorax paradoxus EPS	1	1	0
17604	Variovorax paradoxus S110	1	1	0
17614	Vibrio parahaemolyticus RIMD 2210633	1	1	0
17634	Xylanimonas cellulosilytica DSM 15894	1	1	0
17640	Yersinia pestis Angola	1	1	0
17651	Zymomonas mobilis subsp. mobilis NCIMB 11163	1	1	0
17652	Zymomonas mobilis subsp. mobilis ZM4	1	1	0
[truncated: 106 more columns]

## Sheet: six-frame PROMER by genome
	target					query
OG_id	genome_id	name	start	end	acc#	que_locus	name	% simil	% que_cov
OG_00700252	16628	Acaryochloris marina MBIC11017	5409160	5407841	NC_009925	Acfer_0044	Acidaminococcus fermentans DSM 20731	65.99	99.5495
OG_00701205	16628	Acaryochloris marina MBIC11017	-	-	-	-	-	-	-
OG_00372429	16629	Acetobacter pasteurianus IFO 3283-01	2508026	2510851	NC_013209	Rpdx1_1717	Rhodopseudomonas palustris DX-1	68.45	99.6845
OG_00372429	19738	Acetobacter pasteurianus IFO 3283-01-42C	2415772	2418597	AP011163	Rpdx1_1717	Rhodopseudomonas palustris DX-1	68.45	99.6845
OG_00372429	19739	Acetobacter pasteurianus IFO 3283-03	2509233	2512058	AP011128	Rpdx1_1717	Rhodopseudomonas palustris DX-1	68.45	99.6845
OG_00372429	19740	Acetobacter pasteurianus IFO 3283-07	2506575	2509400	AP011135	Rpdx1_1717	Rhodopseudomonas palustris DX-1	68.45	99.6845
OG_00372429	19741	Acetobacter pasteurianus IFO 3283-12	2506570	2509395	AP011170	Rpdx1_1717	Rhodopseudomonas palustris DX-1	68.45	99.6845
OG_00372429	19742	Acetobacter pasteurianus IFO 3283-22	2509213	2512038	AP011142	Rpdx1_1717	Rhodopseudomonas palustris DX-1	68.45	99.6845
OG_00372429	19743	Acetobacter pasteurianus IFO 3283-26	2509255	2512080	AP011149	Rpdx1_1717	Rhodopseudomonas palustris DX-1	68.45	99.6845
OG_00372429	19744	Acetobacter pasteurianus IFO 3283-32	2506588	2509413	AP011156	Rpdx1_1717	Rhodopseudomonas palustris DX-1	68.45	99.6845
OG_00486222	19745	Acetohalobium arabaticum DSM 5501	1975431	1972702	CP002105	DEFDS_0888	Deferribacter desulfuricans SSM1	69.72	99.3569
OG_00802962	19745	Acetohalobium arabaticum DSM 5501	-	-	-	-	-	-	-
OG_00006771	16630	Acholeplasma laidlawii PG-8A	-	-	-	-	-	-	-
OG_00342722	16630	Acholeplasma laidlawii PG-8A	-	-	-	-	-	-	-
OG_00485948	16630	Acholeplasma laidlawii PG-8A	-	-	-	-	-	-	-
OG_00486087	16630	Acholeplasma laidlawii PG-8A	-	-	-	-	-	-	-
OG_00486141	16630	Acholeplasma laidlawii PG-8A	-	-	-	-	-	-	-
OG_00486366	16630	Acholeplasma laidlawii PG-8A	-	-	-	-	-	-	-
OG_00486423	16630	Acholeplasma laidlawii PG-8A	-	-	-	-	-	-	-
OG_00487008	16630	Acholeplasma laidlawii PG-8A	-	-	-	-	-	-	-
OG_00487020	16630	Acholeplasma laidlawii PG-8A	423876	424250	NC_010163	Hprae_1469	Halanaerobium praevalens DSM 2228	74.4	38.2263
OG_00487272	16630	Acholeplasma laidlawii PG-8A	-	-	-	-	-	-	-
OG_00497785	16630	Acholeplasma laidlawii PG-8A	-	-	-	-	-	-	-
OG_00582020	16630	Acholeplasma laidlawii PG-8A	1269598	1268765	NC_010163	PAM_192	Onion yellows phytoplasma OY-M	63.67	94.7761
OG_00802794	16630	Acholeplasma laidlawii PG-8A	-	-	-	-	-	-	-
OG_00803249	16630	Acholeplasma laidlawii PG-8A	-	-	-	-	-	-	-
[truncated: 9,013 more rows]

## Sheet: six-frame PROMER by OG
	target					query
OG_id	genome_id	name	start	end	acc#	que_locus	name	% simil	% que_cov
[truncated: 9,040 more rows]
